# Supplementary material for: COVID-19 mortality prediction using ensemble learning and grey wolf optimization
Source: PeerJ journal article supplement (doi:10.7717/peerj-cs.1209), 2023-02-24
Supplement: code_r1.zip [file code_r1.zip]

## Sheet: Sheet1
Derivation cohort	LOS_Y	LOS	Death	Age	Severity	Black	White	Asian	Latino	MI	PVD	CHF	CVD	DEMENT	COPD	DM Complicated	DM Simple	Renal Disease	All CNS	Pure CNS	Stroke	Seizure	OldSyncope	OldOtherNeuro	OtherBrnLsn	Age	AgeScore	O2SatsYes	OsSats	O2 Sat < 94	TempYes	Temp	Temp > 38	MapYes	MAP	MAP < 70	DDimerYes	Ddimer	D-Dimer > 3	PltsYes	Plts	PltsScore	INRYes	INR	INR > 1.2	BUNYes	BUN	BUN > 30	CrtnYes
1	1	1	0	>80	3	0	0	0	0	0	0	0	0	0	0	0	0	0	0	0	0	0	0	0	0	89	3	1	95	0	1	36.8889	0	1	102.667	0	1	0.63	0	1	205	0	1	1.1	0	1	16	0	1
1	1	2	1	>60	7	0	1	0	0	0	1	0	0	0	0	0	0	0	0	0	0	0	0	0	0	67	1	1	89	1	1	36.3333	0	1	86	0	1	2.86	0	1	254	0	1	1.4	0	1	206	1	1
1	1	2	1	>80	7	0	1	0	0	0	1	1	1	1	1	0	0	1	0	0	0	0	0	0	0	94	3	1	99	0	1	39.2222	1	1	67.3333	0	1	2.78	0	1	137	1	1	1	0	1	85	1	1
1	1	15	0	>70	9	1	0	0	0	1	0	0	0	1	0	0	1	0	1	1	0	0	0	0	0	72	2	1	86	1	1	38.8889	1	1	102.667	0	1	3.02	1	1	223	0	1	1.3	1	0	0	0	1
1	1	9	0	>70	7	1	0	0	0	0	0	0	0	0	0	0	0	0	0	0	0	0	0	0	0	71	2	1	93	1	1	38.0556	1	1	104.333	0	1	1.65	0	1	125	1	1	1	0	0	0	0	1
1	1	14	1	>70	5	0	1	0	0	0	0	0	1	0	0	1	1	1	0	0	0	0	0	0	0	74	2	1	92	1	1	38.7778	1	1	50.6667	1	0	0	0	1	158	0	1	1.8	0	1	23	0	1
1	1	4	0	>70	2	1	0	0	0	0	0	0	0	1	0	0	0	0	0	0	0	0	0	0	0	71	2	1	96	0	1	37.0556	0	1	96.6667	0	1	2.11	0	1	258	0	1	0.9	0	1	14	0	1
1	1	3	0	>60	3	0	1	0	0	0	0	0	0	0	0	0	0	0	0	0	0	0	0	0	0	66	1	1	99	0	1	36.9444	0	1	62.3333	0	1	0.81	0	1	130	1	1	1.2	0	0	0	0	1
1	1	9	0	>60	5	0	1	0	1	0	0	0	0	0	0	0	0	0	0	0	0	0	0	0	0	66	1	1	94	0	1	38.3889	1	1	84.6667	0	1	3.14	1	1	241	0	1	1.1	1	1	27	0	1
1	1	3	0	>80	6	1	0	0	0	0	0	0	0	0	0	0	0	0	0	0	0	0	0	0	0	84	3	1	95	0	1	36.6667	0	1	82.3333	0	1	4.25	1	1	364	0	1	1.1	1	1	20	0	1
1	1	6	1	>80	5	0	1	0	0	0	0	0	0	0	0	0	0	0	0	0	0	0	0	0	0	92	3	1	92	1	1	37.9444	0	1	106.333	0	1	1.26	0	1	209	0	1	1.1	0	1	13	0	1
1	1	6	1	>80	7	1	0	0	0	0	0	0	1	0	0	0	0	0	0	0	0	0	0	0	0	89	3	1	90	1	1	37.2222	0	1	106	0	0	0	0	1	162	0	1	1.1	0	1	35	1	1
1	1	6	0	>60	4	0	1	0	0	0	0	0	0	0	0	0	0	0	0	0	0	0	0	0	0	64	1	1	88	1	1	37.3333	0	1	87	0	1	1.52	0	1	248	0	1	0.9	0	1	9	0	1
1	1	1	1	>80	6	1	0	0	0	0	0	1	0	1	0	0	0	0	0	0	0	0	0	0	0	88	3	1	91	1	1	37.7222	0	1	101.333	0	0	0	0	1	168	0	1	1.1	0	1	82	1	1
1	1	7	0	>80	3	0	0	0	1	0	0	0	0	0	0	0	0	1	0	0	0	0	0	0	0	97	3	1	100	0	1	37.6111	0	1	97.6667	0	0	0	0	1	195	0	1	1.2	0	1	16	0	1
1	1	11	0	>80	7	0	1	0	0	1	1	1	1	1	0	0	1	1	0	0	0	0	0	0	0	87	3	1	82	1	1	37.2778	0	1	86	0	1	2.18	0	1	126	1	1	1.1	0	1	11	0	1
1	1	10	1	>80	4	0	1	0	0	0	0	0	0	0	0	0	0	0	1	0	1	0	0	0	0	85	3	1	96	0	1	38.0556	1	1	90.3333	0	1	1.95	0	1	272	0	1	1.1	0	1	55	1	1
1	1	1	0	>60	2	1	0	0	0	0	1	1	0	0	1	1	1	1	0	0	0	0	0	0	0	66	1	1	92	1	1	36.1111	0	1	94	0	1	0.32	0	1	293	0	1	0.9	0	1	15	0	1
1	1	7	1	>80	5	0	0	0	0	0	0	0	1	1	0	0	0	0	0	0	0	0	0	0	0	87	3	1	100	0	1	37.8889	0	1	86.6667	0	0	0	0	1	143	1	1	1.2	0	1	19	0	1
1	1	3	0	>70	5	1	0	0	0	0	0	0	0	0	0	0	0	0	0	0	0	0	0	0	0	73	2	1	100	0	1	36.7222	0	1	94.6667	0	1	1.57	0	1	487	0	1	1	0	1	44	1	1
1	1	5	0	>60	2	0	1	0	0	0	0	1	0	0	0	0	0	0	0	0	0	0	0	0	0	61	1	1	93	1	1	37.3333	0	1	104.333	0	1	0.26999	0	1	154	0	1	0.9	0	1	14	0	1
1	1	25	1	0-60	2	0	1	0	0	0	1	0	1	1	0	0	0	0	1	1	0	0	0	0	0	54	0	1	95	0	1	36.7222	0	1	34	1	1	1.93	0	1	223	0	1	1	0	1	16	0	1
1	1	14	0	0-60	3	0	0	0	1	0	0	0	0	0	0	0	0	0	0	0	0	0	0	0	0	48	0	1	92	1	1	38.6667	1	1	69.6667	0	1	1.29	0	1	170	0	1	0.9	0	1	9	0	1
1	1	13	0	>70	5	0	1	0	0	0	0	0	1	0	0	0	0	0	0	0	0	0	0	0	0	72	2	1	91	1	1	37	0	1	87	0	1	1.36	0	1	130	1	1	1.2	0	1	33	1	1
1	1	5	1	>60	4	0	1	0	0	0	0	0	0	1	0	0	0	1	0	0	0	0	0	0	0	69	1	1	90	1	1	37	0	1	76.6667	0	1	20	1	1	224	0	1	1.2	1	1	21	0	1
1	1	3	0	>60	3	0	0	0	1	1	1	1	1	1	0	0	1	1	0	0	0	0	0	0	0	65	1	1	99	0	1	37	0	1	90.3333	0	1	0.8	0	1	348	0	1	1.1	0	1	5	0	1
1	1	15	1	>70	6	0	1	0	0	0	0	0	0	0	0	0	0	0	0	0	0	0	0	0	0	73	2	1	100	0	1	36.6667	0	1	60.3333	0	1	1.64	0	1	217	0	1	1	0	0	0	0	1
1	1	4	0	0-60	0	0	0	0	1	0	0	0	0	1	0	0	0	0	0	0	0	0	0	0	0	35	0	1	94	0	1	38.7222	1	1	88	0	1	0.32	0	1	204	0	1	1	0	1	8	0	1
1	1	17	0	0-60	1	1	0	0	0	0	0	1	0	0	0	0	0	1	0	0	0	0	0	0	0	35	0	1	95	0	1	36.7778	0	1	102.333	0	1	2.13	0	1	100	1	1	1	0	0	0	0	1
1	1	2	1	0-60	4	0	0	0	0	0	0	0	0	1	0	0	0	1	0	0	0	0	0	0	0	58	0	1	86	1	1	37	0	1	87.6667	0	1	3.4	1	1	188	0	1	1.1	1	1	21	0	1
1	1	26	0	>60	3	0	1	0	0	1	1	1	1	1	0	1	1	1	0	0	0	0	0	0	0	62	1	1	82	1	1	37.5	0	1	77.3333	0	1	1.15	0	1	161	0	1	1.1	0	0	0	0	1
1	1	3	0	0-60	2	0	1	0	0	0	1	0	0	0	0	0	0	0	0	0	0	0	0	0	0	48	0	1	90	1	1	37.5556	0	1	111	0	1	1.27	0	1	223	0	1	0.9	0	1	9	0	1
1	1	3	0	>70	2	1	0	0	0	0	0	0	1	1	0	0	0	1	1	1	0	0	0	1	0	79	2	1	95	0	1	38.2778	1	1	75	0	0	0	0	1	165	0	1	1.1	0	1	20	0	1
1	1	11	1	0-60	4	0	0	0	1	0	0	0	1	0	0	0	0	0	1	0	1	0	0	0	0	57	0	1	74	1	1	38.5556	1	1	76	0	1	3.16	1	1	176	0	1	1.2	1	1	12	0	1
1	1	7	0	0-60	5	1	0	0	0	0	0	0	0	0	0	0	0	0	0	0	0	0	0	0	0	59	0	1	80	1	1	36.1667	0	1	109.667	0	1	3.21	1	1	442	0	1	0.9	1	0	0	0	1
1	1	4	0	>70	3	0	0	0	1	0	0	0	0	0	0	0	0	0	0	0	0	0	0	0	0	71	2	1	94	0	1	39	1	1	78.6667	0	1	0.84	0	1	188	0	1	1.3	0	1	18	0	1
1	1	9	1	>60	4	1	0	0	0	0	0	0	0	0	0	0	0	1	0	0	0	0	0	0	0	61	1	1	94	0	1	36.8889	0	1	93.3333	0	1	20	1	1	239	0	1	1.4	1	0	0	0	1
1	1	4	0	>70	5	1	0	0	0	0	0	0	0	0	0	0	0	0	0	0	0	0	0	0	0	76	2	1	92	1	1	36.8889	0	1	79.6667	0	1	2.04	0	1	225	0	1	1.1	0	0	0	0	1
1	1	11	0	0-60	2	1	0	0	0	0	0	0	1	0	0	1	1	1	0	0	0	0	0	0	0	57	0	1	90	1	1	37.1667	0	1	94	0	1	1.59	0	1	410	0	1	1.1	0	1	14	0	1
1	0	0	0	>60	5	0	1	0	0	0	1	0	0	0	0	0	0	0	0	0	0	0	0	0	0	64	1	1	95	0	1	39.3889	1	1	87.3333	0	1	3.16	1	1	30	2	1	1.1	1	1	20	0	1
1	1	6	1	>80	7	1	0	0	0	0	0	0	1	0	0	0	0	0	0	0	0	0	0	0	0	90	3	1	87	1	1	39	1	1	102	0	0	0	0	1	92	2	1	1.8	0	1	12	0	1
1	1	1	1	>70	10	1	0	0	0	0	0	0	0	0	0	0	0	0	1	1	0	0	1	0	0	76	2	1	77	1	1	35.1667	0	1	54.6667	1	1	20	1	1	121	1	1	1.5	1	1	191	1	1
1	1	5	0	>60	3	0	1	0	0	0	1	0	0	0	0	0	0	0	0	0	0	0	0	0	0	62	1	0	94	0	0	37.2778	0	1	68.3333	0	1	0	0	1	0	2	1	0	0	0	0	0	0
1	0	0	0	>60	3	1	0	0	1	0	0	0	0	0	0	0	0	0	0	0	0	0	0	0	0	69	1	1	89	1	1	38.4444	1	1	106.333	0	1	0.7	0	1	234	0	1	1.2	0	1	11	0	1
1	1	26	1	>80	8	0	1	0	0	0	0	0	0	0	0	0	0	0	0	0	0	0	0	0	0	82	3	1	100	0	1	36.8333	0	1	50	1	1	4.06	1	1	180	0	1	1.1	1	1	46	1	1
1	1	2	1	>80	9	0	1	0	0	0	0	0	1	0	0	0	0	0	1	0	0	0	0	0	1	89	3	1	94	0	1	37.1667	0	1	64	0	1	20	1	1	164	0	1	1.4	1	1	147	1	1
1	1	4	0	0-60	3	1	0	0	0	0	0	0	0	0	0	0	0	0	0	0	0	0	0	0	0	58	0	1	93	1	1	38.0556	1	1	118.333	0	1	0	0	1	152	0	1	1.1	0	1	24	0	1
1	1	2	1	>70	6	0	1	0	0	0	0	0	0	0	0	1	1	1	1	1	0	0	0	1	0	75	2	1	93	1	1	38.7778	1	1	80	0	1	3.88	1	1	177	0	1	1.1	1	1	17	0	1
1	1	5	0	>60	2	1	0	0	0	0	0	0	0	0	0	0	0	0	0	0	0	0	0	0	0	68	1	1	97	0	1	36.8889	0	1	94.6667	0	1	0.66	0	1	735	0	1	1	0	1	57	1	1
1	1	11	0	>60	5	1	0	0	0	0	0	0	0	0	0	0	0	1	0	0	0	0	0	0	0	67	1	1	100	0	1	36.2222	0	1	91	0	1	1.67	0	1	220	0	1	1.1	0	1	34	1	1
1	0	0	0	>70	5	1	0	0	0	1	0	0	0	0	0	0	1	0	0	0	0	0	0	0	0	74	2	1	94	0	1	36.8889	0	1	109.667	0	1	3.24	1	1	265	0	1	1.2	1	1	31	1	1
1	1	7	1	>80	7	0	1	0	0	0	0	1	0	0	0	1	1	1	0	0	0	0	0	0	0	90	3	1	96	0	1	36.3333	0	1	58	0	1	0.69	0	1	326	0	1	2.6	0	1	99	1	1
1	1	3	0	>70	7	1	0	0	0	1	1	1	1	0	0	1	1	1	0	0	0	0	0	0	0	77	2	1	96	0	1	38.1667	1	1	68.6667	0	1	2.83	0	1	140	1	1	1.8	0	1	24	0	1
1	1	8	0	>60	2	0	0	0	1	0	0	0	0	0	0	0	0	0	0	0	0	0	0	0	0	69	1	1	100	0	1	36.8889	0	1	68.6667	0	1	1.9	0	1	256	0	1	1	0	1	7	0	1
1	1	9	0	>60	1	1	0	0	0	0	0	0	0	0	0	1	1	1	0	0	0	0	0	0	0	70	1	1	97	0	1	37.2778	0	1	118.667	0	0	0	0	1	188	0	1	1	0	1	14	0	1
1	1	5	0	>70	3	1	0	0	0	1	0	1	1	0	0	1	1	1	0	0	0	0	0	0	0	80	2	1	91	1	1	38.4444	1	1	95.3333	0	1	1.68	0	1	150	0	0	0	0	1	30	0	1
1	1	4	1	0-60	7	1	0	0	0	0	0	0	0	1	0	0	0	1	0	0	0	0	0	0	0	49	0	1	91	1	1	39.5556	1	1	71.3333	0	1	3.59	1	1	57	2	1	1.5	1	1	60	1	1
1	1	9	1	>60	3	0	0	0	1	1	0	1	0	0	0	1	1	1	0	0	0	0	0	0	0	61	1	1	93	1	1	37.1111	0	1	66.6667	0	1	0.35	0	1	352	0	1	1	0	1	17	0	1
1	1	2	0	0-60	3	1	0	0	0	0	1	0	1	1	0	0	0	1	0	0	0	0	0	0	0	60	0	1	90	1	1	37.7778	0	1	71.3333	0	1	3.35	1	1	239	0	1	1	1	1	7	0	1
1	1	6	0	0-60	0	1	0	0	0	0	0	0	0	0	0	0	0	0	0	0	0	0	0	0	0	50	0	1	99	0	1	36.8889	0	1	105.333	0	1	0.91	0	1	219	0	1	1	0	1	11	0	1
1	1	14	0	>60	3	0	0	0	0	0	0	0	0	0	0	0	0	0	0	0	0	0	0	0	0	61	1	1	84	1	1	39.4444	1	1	80.3333	0	1	1.68	0	1	243	0	1	0.9	0	1	13	0	1
1	1	7	0	>70	4	0	0	0	0	0	1	1	1	0	1	1	1	0	0	0	0	0	0	0	0	74	2	1	92	1	1	37.0556	0	1	96.3333	0	1	0.75	0	1	286	0	1	1.1	0	1	13	0	1
1	1	12	1	>60	5	1	0	0	0	0	0	0	0	0	0	0	0	0	0	0	0	0	0	0	0	63	1	1	86	1	1	37.4444	0	1	72	0	1	3.97	1	1	307	0	1	1	1	1	61	1	1
1	1	5	0	0-60	3	1	0	0	0	1	1	1	0	0	0	1	1	1	0	0	0	0	0	0	0	36	0	1	91	1	1	38.9444	1	1	100.333	0	1	0.56	0	1	286	0	1	1.1	0	1	17	0	1
1	1	3	0	>60	3	0	0	0	1	0	0	0	0	0	0	0	0	0	0	0	0	0	0	0	0	61	1	1	93	1	1	36.8333	0	1	68.6667	0	1	0.82	0	1	438	0	1	1	0	1	13	0	1
1	1	6	0	>60	4	1	0	0	0	0	1	0	0	0	0	0	0	1	0	0	0	0	0	0	0	61	1	1	99	0	1	37.7222	0	1	72.3333	0	1	4.1	1	1	340	0	1	1.1	1	1	12	0	1
1	1	8	0	0-60	3	0	0	0	1	0	0	0	0	0	0	0	0	1	0	0	0	0	0	0	0	30	0	1	98	0	1	36.5556	0	1	78.6667	0	1	3.42	1	1	329	0	1	1.4	1	1	13	0	1
1	1	3	0	>60	4	1	0	0	0	0	0	1	0	1	0	1	1	1	1	0	1	0	0	0	0	69	1	1	99	0	1	37.2222	0	1	86	0	1	6.28	1	1	170	0	1	1	1	1	24	0	1
1	1	3	0	0-60	1	0	1	0	0	0	0	0	0	0	0	0	0	0	1	1	0	0	0	1	0	52	0	1	96	0	1	37.1667	0	1	100	0	1	0.89	0	1	967	0	1	1.2	0	1	15	0	1
1	1	9	1	>70	5	1	0	0	0	0	0	0	0	0	0	0	0	0	0	0	0	0	0	0	0	75	2	1	95	0	1	37.6111	0	1	75	0	1	5.17	1	1	346	0	1	1.2	1	1	26	0	1
1	0	0	0	0-60	0	0	0	0	1	0	0	0	0	0	0	0	0	0	0	0	0	0	0	0	0	29	0	1	98	0	1	37.4444	0	1	100.333	0	1	0.26999	0	1	267	0	1	1.1	0	1	13	0	1
1	1	9	0	0-60	4	0	0	0	1	0	0	0	1	0	1	0	0	0	0	0	0	0	0	0	0	57	0	1	87	1	1	36.7222	0	1	94.3333	0	1	4.54	1	1	453	0	1	1.1	1	0	0	0	1
1	1	3	0	0-60	1	1	0	0	0	0	0	0	0	0	0	0	0	0	0	0	0	0	0	0	0	58	0	0	0	1	0	0	0	0	0	0	1	0.34	0	1	356	0	1	1.1	0	1	20	0	1
1	1	10	0	0-60	2	0	0	0	0	1	0	1	0	1	0	0	1	1	0	0	0	0	0	0	0	30	0	1	96	0	1	38.3889	1	1	104.667	0	1	0	0	1	0	2	1	0	0	0	0	0	0
1	1	4	0	>70	3	0	0	0	1	0	1	0	1	0	0	0	0	1	1	1	0	0	1	0	0	80	2	1	98	0	1	36.6667	0	1	89.3333	0	1	10.45	1	1	507	0	1	1.1	1	1	26	0	1
1	1	4	0	>60	4	1	0	0	0	0	0	0	0	0	0	0	0	0	0	0	0	0	0	0	0	62	1	1	90	1	1	37.4444	0	1	90	0	1	1.84	0	1	191	0	1	1.1	0	1	21	0	1
1	1	6	1	>70	8	1	0	0	0	0	0	0	0	0	1	1	1	1	0	0	0	0	0	0	0	75	2	1	95	0	1	36.7222	0	1	58.3333	1	1	20	1	1	101	1	1	1.1	1	0	0	0	1
1	1	4	0	>70	3	1	0	0	0	1	1	0	1	1	0	1	1	1	0	0	0	0	0	0	0	77	2	1	96	0	1	36.7222	0	1	80	0	1	2.68	0	1	517	0	1	1.1	0	1	11	0	1
1	0	0	0	>60	6	1	0	0	0	0	0	0	0	0	0	0	0	0	0	0	0	0	0	0	0	68	1	1	97	0	1	36.7222	0	1	85	0	1	11.03	1	1	147	1	1	1.2	1	1	58	1	1
1	1	4	0	0-60	1	0	0	0	0	0	1	0	0	0	0	0	0	0	0	0	0	0	0	0	0	60	0	0	0	1	1	-17.7778	0	1	115.667	0	1	2.87	0	1	259	0	0	0	0	1	18	0	1
1	1	11	0	>80	5	0	0	0	1	0	0	0	0	0	1	1	1	1	1	1	0	0	0	0	0	82	3	1	90	1	1	36.8889	0	1	88.6667	0	1	6.8	1	1	150	0	1	1.1	1	1	43	1	1
1	1	9	0	>60	4	1	0	0	0	0	0	0	0	0	0	0	0	0	0	0	0	0	0	0	0	63	1	0	0	1	0	0	0	0	0	0	1	1	0	0	0	0	1	1	0	0	0	0	0
1	1	7	1	>60	1	1	0	0	0	0	0	0	0	0	0	1	1	0	1	1	0	0	0	1	0	63	1	1	98	0	1	37.6111	0	1	114	0	1	1.33	0	1	189	0	1	1	0	1	31	1	1
1	0	0	0	0-60	4	1	0	0	0	0	0	0	1	0	0	0	0	0	1	1	0	0	0	1	0	49	0	1	89	1	1	37.7222	0	1	90	0	1	10.51	1	1	248	0	1	1	1	0	0	0	1
1	1	8	0	>70	4	1	0	0	0	0	0	0	1	0	0	0	0	0	0	0	0	0	0	0	0	74	2	1	85	1	1	38	0	1	78	0	1	1.96	0	1	246	0	1	1.4	0	1	30	0	1
1	1	6	0	0-60	2	1	0	0	0	0	1	1	0	1	1	1	1	1	0	0	0	0	0	0	0	44	0	1	97	0	1	36.1111	0	0	0	0	0	0	0	1	143	1	1	1	0	1	18	0	1
1	1	7	0	>70	4	0	0	0	0	0	0	0	0	0	0	1	1	0	0	0	0	0	0	0	0	74	2	1	95	0	1	35.7222	0	1	102	0	1	2.39	0	1	185	0	1	1.2	0	1	51	1	1
1	1	14	0	0-60	3	0	0	0	1	0	1	0	0	0	1	0	0	0	0	0	0	0	0	0	0	49	0	1	90	1	1	38	0	1	72.3333	0	1	1.55	0	1	394	0	1	1.1	0	1	7	0	1
1	1	6	1	>80	6	0	1	0	0	0	0	0	1	0	1	0	0	1	0	0	0	0	0	0	0	91	3	1	90	1	1	38.2222	1	1	60.3333	0	1	2.06	0	1	150	0	1	1.2	0	1	15	0	1
1	1	3	1	>80	4	1	0	0	0	1	0	0	1	1	0	0	1	1	1	1	0	0	0	1	0	89	3	1	79	1	1	37.1111	0	1	72.3333	0	0	0	0	1	185	0	0	0	0	1	45	1	1
1	1	2	0	>70	5	0	1	0	0	1	0	1	0	0	1	1	1	1	1	1	0	0	1	0	0	77	2	1	95	0	1	37.6111	0	1	80.3333	0	1	16.07	1	1	52	2	1	1.1	1	1	18	0	1
1	1	26	0	0-60	2	1	0	0	0	0	0	0	0	0	0	0	0	0	0	0	0	0	0	0	0	56	0	1	100	0	1	37.3889	0	1	67.3333	0	1	3.1	1	1	398	0	1	1.1	1	1	15	0	1
1	1	3	0	0-60	0	0	1	0	0	0	0	0	0	0	0	0	0	0	0	0	0	0	0	0	0	38	0	1	98	0	1	37	0	1	79.3333	0	1	0.57	0	1	218	0	1	1.1	0	1	14	0	1
1	1	4	1	>70	10	0	1	0	0	0	0	1	0	0	1	0	0	0	0	0	0	0	0	0	0	76	2	1	77	1	1	36.4444	0	1	52.3333	1	1	4.15	1	1	91	2	1	1	1	1	83	1	1
1	1	5	0	0-60	0	1	0	0	0	0	0	0	1	0	0	0	0	0	0	0	0	0	0	0	0	50	0	1	98	0	1	36.6111	0	1	83.6667	0	1	0.27	0	1	198	0	1	1	0	1	6	0	1
1	1	1	0	>60	2	1	0	0	0	0	0	0	0	0	0	0	0	0	0	0	0	0	0	0	0	67	1	1	90	1	1	36.8889	0	1	75.3333	0	0	0	0	1	204	0	1	1	0	1	16	0	1
1	1	7	0	>70	7	1	0	0	0	0	0	0	0	0	0	0	0	0	0	0	0	0	0	0	0	77	2	1	91	1	1	37.5	0	1	85.3333	0	1	0.78	0	1	216	0	1	7.8	0	1	65	1	1
1	1	2	0	0-60	2	1	0	0	0	1	1	0	1	0	0	0	1	0	1	1	0	0	0	1	0	53	0	1	93	1	1	37.5	0	1	91.6667	0	0	0	0	1	254	0	1	1	0	1	8	0	1
1	1	8	0	>80	5	1	0	0	0	0	0	0	0	0	0	0	0	0	0	0	0	0	0	0	0	92	3	1	98	0	1	36.4444	0	1	104	0	1	15.2	1	1	634	0	1	1.1	1	1	91	1	1
1	1	29	0	>60	4	1	0	0	0	0	0	0	0	0	0	0	0	0	0	0	0	0	0	0	0	68	1	1	95	0	1	37.7222	0	1	76.6667	0	1	20	1	1	243	0	1	1	1	1	9	0	1
1	1	6	0	0-60	2	1	0	0	0	0	0	0	0	0	0	1	1	0	0	0	0	0	0	0	0	60	0	1	100	0	1	37.1667	0	1	79.6667	0	1	0.87	0	1	120	1	1	1.2	0	1	10	0	1
1	1	16	0	>60	4	0	0	0	1	0	0	0	0	0	0	0	0	0	0	0	0	0	0	0	0	62	1	1	90	1	1	37.3333	0	1	85	0	1	5	1	1	348	0	1	1.1	1	1	11	0	1
1	1	20	1	0-60	2	0	0	0	1	0	0	0	0	0	1	0	0	0	0	0	0	0	0	0	0	51	0	1	96	0	1	38.6111	1	1	85.6667	0	1	20	1	1	160	0	1	1	1	1	9	0	1
1	1	9	1	>80	6	1	0	0	0	0	0	0	0	0	0	0	0	0	0	0	0	0	0	0	0	81	3	1	92	1	1	38.3889	1	1	102	0	1	1.5	0	1	215	0	1	1	0	1	41	1	1
1	1	13	0	0-60	3	0	1	0	0	0	0	0	0	0	0	0	0	0	0	0	0	0	0	0	0	27	0	1	99	0	1	36.8333	0	1	62.6667	0	1	0.86	0	1	51	2	1	1.1	0	1	14	0	1
1	1	2	0	>60	2	0	1	0	0	0	0	0	0	0	0	0	0	0	0	0	0	0	0	0	0	65	1	1	99	0	1	36.7778	0	1	90.6667	0	1	1.23	0	1	352	0	1	1	0	1	15	0	1
1	1	12	0	>60	4	0	0	0	0	0	0	0	0	0	0	0	0	0	0	0	0	0	0	0	0	65	1	1	92	1	1	39.3333	1	1	89.6667	0	0	0	0	1	213	0	1	1.1	0	1	22	0	1
1	1	11	0	>80	6	0	1	0	1	1	0	0	0	0	1	1	1	0	0	0	0	0	0	0	0	89	3	1	91	1	1	37	0	1	79	0	1	2.8	0	1	252	0	1	1.1	0	1	66	1	1
1	1	2	1	>80	9	1	0	0	0	0	0	0	0	0	0	0	0	0	0	0	0	0	0	0	0	88	3	1	68	1	1	37.7778	0	1	51	1	1	6.4	1	1	211	0	1	1.2	1	1	130	1	1
1	1	7	0	>70	2	1	0	0	0	0	0	0	0	1	0	0	0	0	0	0	0	0	0	0	0	71	2	1	98	0	1	38.3333	1	1	100.333	0	1	1.14	0	1	259	0	0	0	0	1	22	0	1
1	1	3	0	0-60	0	1	0	0	0	0	0	0	0	0	0	0	0	0	0	0	0	0	0	0	0	26	0	1	97	0	1	0	0	0	0	0	0	0	0	1	156	0	0	0.9	0	0	0	0	0
1	1	3	0	>70	6	1	0	0	0	0	1	1	0	0	1	1	1	1	0	0	0	0	0	0	0	79	2	1	96	0	1	37.4444	0	1	77.3333	0	1	0.38	0	1	183	0	1	2.2	0	1	35	1	1
1	1	1	0	0-60	0	0	0	0	0	0	1	0	0	0	0	0	0	0	0	0	0	0	0	0	0	26	0	1	96	0	1	37.3333	0	1	104	0	0	0	0	1	248	0	1	1.1	0	1	11	0	1
1	1	5	0	0-60	1	0	0	0	0	0	1	1	0	0	0	1	1	1	0	0	0	0	0	0	0	56	0	1	94	0	1	38.2778	1	1	94	0	1	1.74	0	1	238	0	1	1.2	0	1	26	0	1
1	1	3	1	>80	7	0	1	0	0	0	0	0	0	1	0	0	0	1	1	1	0	0	0	1	0	85	3	1	90	1	1	37.6667	0	1	39.6667	1	1	1.06	0	1	123	1	1	1.2	0	0	0	0	1
1	1	2	0	0-60	0	1	0	0	0	0	1	1	0	0	1	1	1	1	0	0	0	0	0	0	0	47	0	1	98	0	1	38.0556	1	1	112.333	0	0	0	0	1	270	0	1	1	0	1	10	0	1
1	1	5	0	>60	4	1	0	0	0	1	0	1	0	0	0	1	1	1	0	0	0	0	0	0	0	68	1	1	94	0	1	36.5556	0	1	96.6667	0	1	3.93	1	1	137	1	1	1.1	1	1	18	0	1
1	1	3	1	>80	8	0	0	0	1	0	0	0	0	1	0	0	0	0	1	1	0	0	0	0	0	82	3	1	77	1	1	37.5556	0	1	64	0	1	7.96	1	1	254	0	1	1.2	1	1	29	0	1
1	1	4	0	0-60	1	0	0	0	0	1	0	1	1	0	0	0	1	0	0	0	0	0	0	0	0	26	0	0	0	1	0	0	0	0	0	0	0	0	0	1	220	0	0	0	0	1	6	0	1
1	1	1	0	>80	5	0	0	0	1	0	1	0	0	0	0	0	0	0	0	0	0	0	0	0	0	88	3	1	93	1	1	37.7778	0	1	93.6667	0	1	0.66	0	1	138	1	1	0.9	0	1	17	0	1
1	1	15	0	>80	4	1	0	0	0	1	0	0	0	0	0	1	1	1	0	0	0	0	0	0	0	88	3	1	98	0	1	36.5556	0	1	106.333	0	1	1.19	0	1	253	0	1	1.2	0	1	39	1	1
1	1	5	0	0-60	0	1	0	0	0	0	0	0	0	0	0	0	0	0	0	0	0	0	0	0	0	58	0	1	97	0	1	37.1111	0	1	94.6667	0	1	0.83	0	1	160	0	1	1	0	1	9	0	1
1	1	2	0	0-60	0	1	0	0	0	0	1	0	0	0	0	0	0	0	0	0	0	0	0	0	0	25	0	1	99	0	0	0	0	0	0	0	0	0	0	1	169	0	0	0	0	1	4.999	0	1
1	1	2	1	0-60	2	1	0	0	0	0	1	1	1	1	0	1	1	1	0	0	0	0	0	0	0	60	0	1	80	1	1	37.6667	0	1	72	0	0	0	0	1	170	0	1	1	0	1	29	0	1
1	1	1	0	>60	1	1	0	0	0	0	0	0	1	1	0	1	1	0	0	0	0	0	0	0	0	64	1	1	96	0	1	37.7222	0	1	80	0	1	1.46	0	1	230	0	1	1	0	1	8	0	1
1	1	4	0	>60	2	1	0	0	0	0	1	0	0	1	0	1	1	1	0	0	0	0	0	0	0	67	1	1	95	0	1	36.7222	0	1	102.333	0	1	0	0	1	253	0	1	1.2	0	1	22	0	1
1	1	4	0	>60	1	1	0	0	0	0	0	0	0	0	0	0	0	0	0	0	0	0	0	0	0	65	1	1	97	0	1	36.6667	0	1	96	0	1	0.47	0	1	338	0	0	0	0	1	14	0	1
1	1	4	0	0-60	2	0	0	0	1	0	0	0	0	0	0	0	0	0	0	0	0	0	0	0	0	59	0	1	95	0	1	37.8333	0	1	96.6667	0	1	1.31	0	1	383	0	1	1	0	1	16	0	1
1	1	5	0	0-60	1	1	0	0	0	0	0	0	0	0	0	0	0	0	0	0	0	0	0	0	0	55	0	1	89	1	1	38.1667	1	1	102.667	0	0	0	0	1	264	0	1	1	0	1	8	0	1
1	1	34	0	>60	4	1	0	0	0	0	1	1	1	1	0	1	1	0	0	0	0	0	0	0	0	68	1	1	79	1	1	36.6667	0	1	100	0	1	3.26	1	1	156	0	1	1.2	1	0	0	0	1
1	1	9	0	>60	4	0	0	0	1	0	0	0	0	0	0	0	0	0	0	0	0	0	0	0	0	70	1	1	97	0	1	37	0	1	77	0	1	3.12	1	1	261	0	1	1.1	1	1	19	0	1
1	1	5	1	>70	5	0	0	0	1	0	1	0	0	0	0	1	1	1	0	0	0	0	0	0	0	71	2	1	87	1	1	36.8889	0	1	72	0	1	8.08	1	1	277	0	1	1	1	1	11	0	1
1	1	16	0	>70	3	1	0	0	0	0	0	1	0	1	0	0	0	1	0	0	0	0	0	0	0	73	2	1	99	0	1	36.7778	0	1	114.667	0	1	0.39	0	1	355	0	1	0.8	0	1	35	1	1
1	1	2	0	0-60	1	1	0	0	0	0	0	0	0	1	0	0	0	0	0	0	0	0	0	0	0	58	0	1	96	0	1	38.3889	1	1	97.6667	0	1	0.78	0	1	189	0	1	1.1	0	1	19	0	1
1	1	1	0	0-60	0	1	0	0	0	1	1	1	1	0	1	1	1	1	0	0	0	0	0	0	0	42	0	1	100	0	1	36.9444	0	1	98.3333	0	1	0.49	0	1	345	0	1	1.1	0	1	8	0	1
1	1	4	0	>70	4	1	0	0	0	0	1	0	0	0	0	0	0	0	0	0	0	0	0	0	0	73	2	1	98	0	1	37.2222	0	1	87.6667	0	1	1.18	0	1	180	0	1	1.1	0	1	45	1	1
1	1	3	0	>70	3	1	0	0	0	0	0	0	0	0	0	0	0	1	1	0	0	1	0	0	0	74	2	1	98	0	1	37.6111	0	1	94	0	0	0	0	1	186	0	1	1	0	1	18	0	1
1	1	16	0	>60	4	1	0	0	0	0	0	0	0	0	0	1	1	1	0	0	0	0	0	0	0	63	1	1	88	1	1	36.5	0	1	85	0	1	5.18	1	1	194	0	1	1	1	0	0	0	1
1	1	8	0	>70	4	0	1	0	1	0	1	0	0	1	0	0	0	0	0	0	0	0	0	0	0	74	2	1	100	0	1	36.2222	0	1	78.6667	0	1	0.27	0	1	137	1	1	1.2	0	1	16	0	1
1	1	14	1	>60	3	0	0	0	1	0	0	1	0	1	0	1	1	0	0	0	0	0	0	0	0	69	1	1	85	1	1	36.9444	0	1	88.3333	0	1	0.69	0	1	388	0	1	2.9	0	1	37	1	1
1	1	3	1	>80	9	0	1	0	0	0	0	0	0	0	0	0	0	0	0	0	0	0	0	0	0	90	3	1	78	1	1	34.7778	0	1	71	0	1	0.94	0	1	128	1	1	17.0001	0	1	217	1	1
1	1	9	0	>60	2	1	0	0	0	0	1	0	1	0	1	1	1	1	1	1	0	0	0	0	0	66	1	0	0	1	0	0	0	0	0	0	0	0	0	0	0	0	0	0	0	0	0	0	0
1	1	10	0	>70	3	1	0	0	0	0	0	0	1	0	0	0	0	0	0	0	0	0	0	0	0	74	2	1	100	0	1	39	1	1	81.3333	0	1	0.9	0	1	229	0	1	1.1	0	1	28	0	1
1	1	4	0	>70	4	0	0	0	1	0	0	0	0	0	0	0	0	0	0	0	0	0	0	0	0	72	2	1	99	0	1	37.2778	0	1	80.3333	0	0	0	0	1	147	1	1	1	0	1	24	0	1
1	1	4	0	0-60	0	0	0	0	1	0	1	0	0	0	0	1	1	0	0	0	0	0	0	0	0	24	0	1	97	0	1	36.8889	0	1	86.3333	0	0	0	0	1	184	0	0	0	0	1	5	0	1
1	1	7	0	>60	4	0	1	0	0	0	1	0	0	0	0	0	0	1	0	0	0	0	0	0	0	65	1	0	0	1	0	0	0	0	0	0	1	2.04	0	1	184	0	1	1.1	0	1	16	0	1
1	1	3	1	0-60	4	0	1	0	0	1	1	1	1	1	0	1	1	1	0	0	0	0	0	0	0	31	0	1	93	1	1	38	0	1	95.6667	0	0	0	0	1	81	2	1	1	0	1	17	0	1
1	1	16	0	>80	5	1	0	0	0	0	0	0	0	0	0	0	0	0	0	0	0	0	0	0	0	82	3	1	98	0	1	36.8889	0	1	78.6667	0	1	1.21	0	1	397	0	1	1.1	0	1	57	1	1
1	1	2	0	>70	4	1	0	0	0	1	0	1	0	0	1	1	1	1	0	0	0	0	0	0	0	80	2	1	92	1	1	37.0556	0	1	69	0	1	2.24	0	1	177	0	1	1	0	1	32	1	1
1	1	3	1	0-60	5	1	0	0	0	0	0	0	1	0	0	0	0	1	0	0	0	0	0	0	0	54	0	1	99	0	0	0	0	0	0	0	1	8.74	1	1	166	0	1	1.4	1	1	57	1	1
1	1	8	0	>80	8	0	1	0	0	0	0	0	0	0	1	0	0	0	0	0	0	0	0	0	0	93	3	1	92	1	1	38.1667	1	1	116.667	0	1	20	1	1	199	0	0	0	1	1	93	1	1
1	1	28	1	>70	7	0	1	0	0	0	0	0	0	0	0	0	0	0	0	0	0	0	0	0	0	74	2	1	80	1	1	38	0	1	62	0	1	3.74	1	1	171	0	1	1.1	1	0	0	0	1
1	1	11	1	>80	8	0	0	0	0	0	0	1	0	0	1	0	0	0	0	0	0	0	0	0	0	91	3	1	85	1	1	39.8889	1	1	38.6667	1	1	2.77	0	1	198	0	1	1.2	0	1	52	1	1
1	1	3	0	>80	7	1	0	0	0	0	0	0	0	0	0	0	0	0	0	0	0	0	0	0	0	87	3	1	87	1	1	37.2778	0	1	86	0	1	5.86	1	1	187	0	1	1	1	1	75	1	1
1	1	3	0	>70	2	0	0	0	1	0	0	0	0	0	0	0	0	0	0	0	0	0	0	0	0	71	2	1	94	0	1	37.2222	0	1	71.3333	0	1	0.95	0	1	392	0	1	1.1	0	1	14	0	1
1	0	0	0	0-60	2	1	0	0	0	0	0	1	0	1	0	1	1	1	0	0	0	0	0	0	0	56	0	0	95	0	0	38.4444	0	1	75.6667	0	1	0	0	0	156	0	0	1	0	1	60	1	1
1	0	0	0	>70	6	0	0	0	1	0	1	0	0	0	0	0	0	0	0	0	0	0	0	0	0	78	2	1	92	1	1	37.5556	0	1	110.333	0	1	6.07	1	1	264	0	1	1.3	1	1	15	0	1
1	1	4	1	>60	2	0	0	0	1	0	0	0	0	0	0	0	0	0	0	0	0	0	0	0	0	66	1	1	95	0	1	38	0	1	102	0	1	1.74	0	1	290	0	1	1.2	0	1	46	1	1
1	1	8	0	0-60	2	1	0	0	0	0	0	0	0	0	0	0	0	0	0	0	0	0	0	0	0	57	0	1	96	0	1	38	0	1	83.3333	0	1	1.69	0	1	148	1	1	1	0	0	0	0	1
1	1	7	1	>70	3	0	0	0	1	0	0	0	0	0	0	0	0	0	0	0	0	0	0	0	0	77	2	1	98	0	1	39.1667	1	1	87.6667	0	1	1.05	0	1	270	0	1	1.3	0	1	24	0	1
1	1	13	1	>60	5	0	1	0	0	0	0	0	0	0	0	0	0	0	0	0	0	0	0	0	0	63	1	1	64	1	1	37.2778	0	1	72.3333	0	1	20	1	1	281	0	1	1	1	1	18	0	1
1	0	0	0	>70	7	1	0	0	0	0	0	0	0	0	0	0	0	0	0	0	0	0	0	0	0	71	2	1	98	0	1	34.5	0	1	95	0	1	15.56	1	1	183	0	1	1.6	1	1	92	1	1
1	1	7	0	>70	3	0	1	0	1	0	0	0	0	0	0	1	1	0	0	0	0	0	0	0	0	72	2	1	96	0	1	36.6667	0	1	91	0	1	0.35	0	1	243	0	1	2.3	0	1	21	0	1
1	1	3	0	>80	6	1	0	0	0	0	1	0	1	0	1	1	1	1	0	0	0	0	0	0	0	83	3	1	88	1	1	37.2778	0	1	88.6667	0	1	2.58	0	1	289	0	1	1.2	0	1	18	0	1
1	1	9	1	>70	5	0	0	0	0	0	1	0	0	0	0	0	0	0	1	1	0	0	0	0	0	71	2	1	95	0	1	36.6111	0	1	46.6667	1	1	2.6	0	1	228	0	1	1	0	1	27	0	1
1	1	9	0	0-60	1	0	0	0	1	1	0	0	0	0	0	0	1	0	0	0	0	0	0	0	0	50	0	0	0	1	0	0	0	0	0	0	1	0.55	0	1	196	0	1	1	0	1	10	0	1
1	1	13	0	>60	3	0	0	0	1	0	0	0	1	0	0	1	1	1	0	0	0	0	0	0	0	69	1	1	96	0	1	36.5	0	1	81	0	1	0.91	0	1	240	0	1	1	0	1	52	1	1
1	1	2	1	>80	8	0	1	0	0	0	0	0	0	0	0	0	0	0	0	0	0	0	0	0	0	82	3	1	93	1	1	36.6111	0	1	87	0	1	5.81	1	1	161	0	1	1.1	1	1	82	1	1
1	1	5	1	>60	5	0	1	0	0	0	0	0	1	0	0	0	0	0	0	0	0	0	0	0	0	67	1	1	97	0	1	38.6111	1	0	0	0	0	0	0	1	158	0	1	1.4	0	1	33	1	1
1	1	10	1	>80	7	0	1	0	0	0	0	1	0	1	1	1	1	1	1	1	0	0	0	0	0	88	3	1	63	1	1	38.0556	1	1	60.3333	0	1	14.97	1	1	210	0	1	1.1	1	1	22	0	1
1	1	25	0	0-60	0	0	1	0	1	0	0	0	0	0	0	0	0	0	0	0	0	0	0	0	0	56	0	1	100	0	1	37.9444	0	1	69	0	1	0.9	0	1	188	0	1	1	0	0	0	0	1
1	1	3	1	>70	9	0	1	0	0	0	1	1	0	0	0	1	1	1	1	1	0	0	0	0	0	77	2	1	93	1	1	36.6111	0	1	96.6667	0	1	20	1	1	200	0	1	1.4	1	1	169	1	1
1	0	0	0	>70	5	0	0	0	1	0	1	0	0	0	0	0	0	0	0	0	0	0	0	0	0	78	2	1	93	1	1	37.0556	0	1	91.3333	0	1	1.98	0	1	182	0	1	1	0	1	20	0	1
1	1	13	0	>80	7	1	0	0	0	0	0	0	0	0	0	0	0	0	0	0	0	0	0	0	0	87	3	1	88	1	1	37.3889	0	1	70.3333	0	1	1.92	0	1	168	0	1	1.1	0	1	51	1	1
1	1	2	0	0-60	1	0	0	0	0	0	1	0	0	0	0	0	0	0	0	0	0	0	0	0	0	58	0	1	96	0	1	36.7778	0	1	89.6667	0	1	1.09	0	1	217	0	1	1.1	0	1	17	0	1
1	0	0	0	>70	4	1	0	0	0	0	0	0	1	1	0	0	0	1	0	0	0	0	0	0	0	73	2	1	100	0	1	37.1111	0	1	79	0	1	2.1	0	1	408	0	1	1.4	0	1	22	0	1
1	1	8	1	>80	6	0	0	0	1	0	0	0	0	0	0	0	0	0	0	0	0	0	0	0	0	86	3	1	99	0	1	36.1111	0	1	100	0	1	3.42	1	1	387	0	1	1.2	1	1	205	1	1
1	1	5	0	>60	2	1	0	0	0	0	0	0	0	0	0	0	0	0	0	0	0	0	0	0	0	64	1	1	94	0	1	37.6667	0	1	94	0	1	0.3	0	1	228	0	1	1.1	0	1	10	0	1
1	1	22	0	>60	6	1	0	0	0	0	0	0	1	1	0	0	0	0	0	0	0	0	0	0	0	68	1	1	96	0	1	38.2222	1	1	78.6667	0	1	1.69	0	1	134	1	1	1.3	0	1	29	0	1
1	1	11	0	0-60	3	0	1	0	0	0	0	0	0	0	0	0	0	0	0	0	0	0	0	0	0	54	0	1	89	1	1	39.8889	1	1	110	0	1	2.06	0	1	172	0	0	0	0	1	11	0	1
1	1	1	0	0-60	0	0	0	0	0	0	0	0	0	0	1	0	0	0	0	0	0	0	0	0	0	44	0	1	100	0	1	37	0	1	92	0	1	0.44	0	1	223	0	1	0.9	0	1	11	0	1
1	1	3	0	0-60	1	1	0	0	0	0	0	0	0	0	0	0	0	0	0	0	0	0	0	0	0	55	0	1	97	0	1	36.8333	0	1	113.333	0	1	0.69	0	1	248	0	1	1.1	0	1	14	0	1
1	1	14	1	0-60	1	0	0	0	0	1	0	1	1	0	0	0	1	0	0	0	0	0	0	0	0	47	0	1	96	0	1	38.0556	1	1	78.6667	0	1	0.55	0	1	138	1	1	1.1	0	1	15	0	1
1	1	8	1	>80	9	0	1	0	0	0	0	0	0	0	0	0	0	0	0	0	0	0	0	0	0	92	3	1	84	1	1	37.3889	0	1	37.6667	1	1	1.53	0	1	375	0	1	1.1	0	1	55	1	1
1	1	3	1	>70	5	1	0	0	0	0	0	0	1	0	1	0	0	0	1	1	0	0	0	0	0	78	2	1	100	0	1	35.6111	0	1	70	0	0	0	0	1	249	0	1	1.1	0	1	51	1	1
1	1	3	1	>70	8	1	0	0	0	0	0	0	0	0	0	0	0	0	0	0	0	0	0	0	0	71	2	1	100	0	1	36.7778	0	1	35.3333	1	1	19.83	1	1	412	0	1	1.8	1	1	157	1	1
1	1	10	1	>60	8	0	0	0	1	0	0	0	1	0	0	0	0	1	1	1	0	0	0	0	0	66	1	1	91	1	1	36.7222	0	1	34	1	1	6.25	1	1	209	0	1	1.4	1	1	110	1	1
1	1	11	0	0-60	3	0	0	0	1	0	0	0	0	0	1	1	1	1	0	0	0	0	0	0	0	60	0	1	95	0	1	37.6111	0	1	104	0	0	0	0	1	137	1	1	1.4	0	1	13	0	1
1	1	5	0	0-60	1	0	1	0	0	0	1	0	0	0	0	0	0	1	0	0	0	0	0	0	0	35	0	1	97	0	1	36.2778	0	1	78.3333	0	1	1.49	0	1	134	1	1	1	0	1	4.999	0	1
1	1	9	0	0-60	1	0	1	0	1	0	1	0	0	0	0	0	0	0	0	0	0	0	0	0	0	50	0	0	0	1	1	-17.7778	0	1	122.333	0	0	0	0	0	0	0	0	0	0	0	0	0	0
1	1	11	0	0-60	3	1	0	0	0	0	0	0	1	0	0	1	1	1	0	0	0	0	0	0	0	33	0	1	97	0	1	36.9444	0	1	79.6667	0	1	4.5	1	1	673	0	1	1.7	1	1	8	0	1
1	1	8	0	>60	3	0	0	0	1	0	0	0	1	1	0	0	0	0	0	0	0	0	0	0	0	66	1	1	87	1	1	37.1111	0	1	103.333	0	1	0.53	0	1	247	0	1	1	0	1	14	0	1
1	1	18	0	0-60	4	1	0	0	0	0	0	0	0	0	0	1	1	1	0	0	0	0	0	0	0	32	0	1	95	0	1	37.0556	0	1	104	0	1	14.26	1	1	278	0	0	0	1	1	51	1	1
1	1	13	0	0-60	4	0	0	0	1	0	0	0	0	0	0	0	0	0	1	1	0	0	0	1	0	59	0	1	96	0	0	35.5556	0	1	81.3333	0	0	0	0	1	64	2	1	1.4	0	1	39	1	1
1	1	3	0	>60	3	0	0	0	1	0	0	0	0	0	0	0	0	0	0	0	0	0	0	0	0	62	1	1	86	1	1	37.2778	0	1	84.3333	0	0	0	0	1	194	0	1	1.1	0	1	18	0	1
1	1	31	0	>60	5	0	0	0	0	0	1	1	0	1	0	0	0	0	0	0	0	0	0	0	0	64	1	1	91	1	1	36.6111	0	1	79.6667	0	1	20	1	1	275	0	1	1.1	1	0	0	0	1
1	1	4	0	0-60	2	0	0	1	0	0	0	0	0	0	1	0	0	0	0	0	0	0	0	0	0	57	0	1	91	1	1	37.3333	0	1	90	0	1	2.71	0	1	354	0	1	1.1	0	1	12	0	1
1	1	4	0	>80	3	1	0	0	0	0	0	0	1	0	1	0	0	0	0	0	0	0	0	0	0	81	3	1	100	0	1	37.8333	0	1	89.6667	0	1	1.13	0	1	282	0	1	1.1	0	0	0	0	1
1	1	4	0	>70	3	0	0	0	1	0	0	0	0	0	0	0	0	0	0	0	0	0	0	0	0	77	2	1	94	0	1	37.2222	0	1	64	0	1	3.65	1	1	226	0	1	1.1	1	1	19	0	1
1	1	7	0	>60	2	1	0	0	0	0	1	1	1	1	0	1	1	1	0	0	0	0	0	0	0	63	1	1	91	1	1	37.5	0	1	78	0	1	0.92	0	1	207	0	1	1	0	1	14	0	1
1	1	9	0	>70	3	1	0	0	0	1	0	0	0	0	0	0	1	1	0	0	0	0	0	0	0	80	2	1	91	1	1	39.3889	1	1	84	0	1	0.76	0	1	177	0	1	1	0	0	0	0	1
1	1	10	0	0-60	0	1	0	0	0	0	0	1	0	0	0	0	0	0	0	0	0	0	0	0	0	49	0	1	99	0	1	37.8889	0	1	102.667	0	0	0	0	1	167	0	0	0	0	1	9	0	1
1	1	13	1	>70	5	1	0	0	0	0	1	0	0	1	1	0	0	1	1	1	0	0	1	0	0	72	2	1	96	0	1	36.8333	0	1	35.6667	1	1	0.7	0	1	116	1	1	1	0	1	29	0	1
1	0	0	0	>70	8	0	0	0	1	0	1	0	0	0	0	0	0	0	0	0	0	0	0	0	0	79	2	1	100	0	1	37.3333	0	1	100	0	1	2.05	0	1	25	2	1	1.3	0	1	70	1	1
1	1	3	0	>60	1	1	0	0	0	0	1	0	1	0	0	1	1	1	0	0	0	0	0	0	0	66	1	1	94	0	1	36.7778	0	1	91	0	1	1.06	0	1	185	0	1	1	0	1	14	0	1
1	1	16	1	0-60	6	1	0	0	0	0	0	0	1	0	0	0	0	0	0	0	0	0	0	0	0	55	0	1	81	1	1	37.1667	0	1	54	1	1	6.11	1	1	334	0	1	1.2	1	0	0	0	1
1	1	5	1	>70	8	1	0	0	0	0	1	1	0	0	0	0	0	1	0	0	0	0	0	0	0	73	2	1	69	1	1	35.9444	0	1	42	1	1	20	1	1	185	0	1	1.1	1	1	45	1	1
1	1	12	1	>60	6	0	0	0	1	0	0	0	1	0	0	0	0	0	0	0	0	0	0	0	0	64	1	1	94	0	1	38.5556	1	1	50.6667	1	1	1.56	0	1	97	2	1	1	0	1	8	0	1
1	1	2	0	0-60	0	0	0	0	1	0	0	0	1	1	0	0	0	0	0	0	0	0	0	0	0	39	0	1	95	0	1	35.1111	0	1	94.6667	0	1	0.53	0	1	213	0	1	1	0	1	9	0	1
1	1	5	0	0-60	1	1	0	0	0	0	1	0	0	0	0	0	0	0	0	0	0	0	0	0	0	46	0	1	96	0	1	38.3889	1	1	98.3333	0	1	1.44	0	1	203	0	1	1	0	1	25	0	1
1	1	17	1	>80	7	1	0	0	0	0	1	1	0	1	1	0	0	0	0	0	0	0	0	0	0	91	3	1	96	0	1	37.5	0	1	74.3333	0	1	20	1	1	114	1	0	0	1	1	34	1	1
1	1	12	0	0-60	1	0	1	0	0	0	0	0	0	0	0	0	0	0	0	0	0	0	0	0	0	40	0	1	98	0	1	37.0556	0	1	95.6667	0	1	0.35	0	1	246	0	1	0.9	0	1	9	0	1
1	1	4	0	>80	7	0	0	0	1	0	0	0	0	0	0	0	0	0	0	0	0	0	0	0	0	81	3	1	68	1	1	36.6667	0	1	74.3333	0	1	20	1	1	1068	0	1	1.1	1	1	30	0	1
1	1	1	0	0-60	2	0	0	0	1	0	1	0	0	0	0	0	0	0	0	0	0	0	0	0	0	56	0	1	96	0	1	38.0556	1	1	103.667	0	1	0.39	0	1	157	0	1	1.2	0	1	16	0	1
1	1	5	1	>80	6	0	0	0	0	0	0	1	1	0	0	0	0	1	0	0	0	0	0	0	0	83	3	1	90	1	1	38.8889	1	1	32.6667	1	1	2.93	0	1	193	0	1	1.1	0	1	36	1	1
1	1	8	1	>60	3	0	0	0	0	0	0	0	0	0	0	0	0	0	0	0	0	0	0	0	0	69	1	1	95	0	1	36.6111	0	1	75	0	1	20	1	1	324	0	1	1.1	1	1	16	0	1
1	1	1	1	>60	6	0	0	0	0	0	0	0	0	0	0	1	1	1	0	0	0	0	0	0	0	65	1	1	89	1	1	33.5	0	1	48	1	0	0	0	1	237	0	1	1.2	0	1	89	1	1
1	1	7	0	0-60	1	1	0	0	0	0	0	0	0	1	0	0	0	0	0	0	0	0	0	0	0	39	0	1	100	0	1	37.5	0	1	88.3333	0	0	0	0	1	204	0	1	0.9	0	1	13	0	1
1	1	4	0	0-60	0	1	0	0	0	0	0	0	0	0	0	1	1	1	0	0	0	0	0	0	0	58	0	1	96	0	1	36.8889	0	1	95	0	0	0	0	1	274	0	1	1	0	1	9	0	1
1	1	10	0	>80	4	0	0	0	1	0	0	0	0	0	0	1	1	1	0	0	0	0	0	0	0	81	3	1	95	0	1	37.6111	0	1	86.6667	0	0	0	0	1	111	1	1	1.1	0	1	15	0	1
1	1	15	0	>70	6	0	0	0	1	0	0	0	0	0	0	0	0	0	0	0	0	0	0	0	0	78	2	1	94	0	1	36.8333	0	1	78	0	1	3.41	1	1	253	0	1	1.9	1	1	46	1	1
1	1	16	0	>60	1	0	1	0	0	0	0	0	0	0	0	0	0	0	0	0	0	0	0	0	0	66	1	1	98	0	1	38.8889	1	1	94.3333	0	0	0	0	1	260	0	1	1.2	0	1	10	0	1
1	1	6	0	0-60	4	1	0	0	0	0	0	0	0	0	0	1	1	1	0	0	0	0	0	0	0	50	0	1	86	1	1	37.2778	0	1	110.333	0	1	4.28	1	1	399	0	1	1.1	1	0	0	0	1
1	1	4	0	>80	8	1	0	0	0	0	0	0	0	0	0	0	0	0	0	0	0	0	0	0	0	89	3	1	100	0	1	39.6667	1	1	88	0	1	4.31	1	1	115	1	1	0.9	1	0	0	0	1
1	1	8	0	>80	6	0	1	0	1	0	0	0	0	0	0	0	0	0	0	0	0	0	0	0	0	85	3	1	88	1	1	36.3333	0	1	100	0	1	1.69	0	1	416	0	1	1.8	0	1	50	1	1
1	1	1	1	>60	7	0	0	0	1	0	1	0	0	0	0	0	0	0	0	0	0	0	0	0	0	68	1	1	94	0	1	36.6667	0	1	53.3333	1	0	0	0	1	70	2	1	1.8	0	1	106	1	1
1	1	9	0	>70	8	1	0	0	0	1	0	0	0	0	0	0	1	0	0	0	0	0	0	0	0	73	2	1	92	1	1	39.4444	1	1	92.3333	0	1	1.78	0	1	131	1	1	1.1	0	1	87	1	1
1	1	6	0	>70	2	0	1	0	0	0	0	0	0	0	0	0	0	0	0	0	0	0	0	0	0	73	2	1	96	0	1	36.5	0	1	86.3333	0	1	0.38	0	1	180	0	1	1.1	0	1	17	0	1
1	1	5	0	>60	2	0	0	0	0	0	1	0	1	0	0	1	1	1	0	0	0	0	0	0	0	64	1	1	96	0	1	38.5556	1	1	95.3333	0	1	2.29	0	1	207	0	1	1.1	0	1	18	0	1
1	1	3	0	>70	3	1	0	0	0	0	0	0	0	0	0	0	0	0	1	0	0	1	0	0	0	77	2	1	93	1	1	36.4444	0	1	71.3333	0	1	2.74	0	1	261	0	1	1.1	0	1	13	0	1
1	1	3	0	>60	2	0	1	0	0	0	1	1	1	1	0	0	0	0	0	0	0	0	0	0	0	64	1	1	97	0	1	36.2778	0	1	104	0	1	1.01	0	1	221	0	1	1	0	1	28	0	1
1	1	12	1	0-60	6	1	0	0	0	0	1	0	0	0	0	0	0	1	0	0	0	0	0	0	0	54	0	1	100	0	1	36.8889	0	1	55.3333	1	1	10.23	1	1	337	0	1	1.1	1	0	0	0	1
1	1	3	1	>70	8	1	0	0	0	0	0	1	0	0	0	1	1	1	0	0	0	0	0	0	0	71	2	1	98	0	1	39.4444	1	1	107	0	1	20	1	1	137	1	1	1.5	1	1	62	1	1
1	1	32	0	0-60	2	1	0	0	0	0	0	0	0	0	0	0	0	0	0	0	0	0	0	0	0	60	0	1	94	0	1	37.0556	0	1	87.3333	0	1	1.76	0	1	177	0	1	1	0	0	0	0	1
1	1	2	0	>60	2	1	0	0	0	0	0	0	0	0	0	0	0	0	0	0	0	0	0	0	0	70	1	1	96	0	1	37	0	1	83.3333	0	1	1.96	0	1	179	0	1	1	0	1	16	0	1
1	1	9	0	0-60	3	1	0	0	0	0	0	1	0	0	1	0	0	1	1	1	0	0	1	0	0	46	0	1	99	0	1	36.8889	0	1	102.333	0	1	20	1	1	241	0	1	1.1	1	1	22	0	1
1	1	2	0	>60	3	0	1	0	0	0	0	0	0	1	0	0	0	0	0	0	0	0	0	0	0	62	1	1	92	1	1	38	0	1	77.3333	0	1	1.01	0	1	292	0	0	0	0	1	18	0	1
1	1	5	0	>60	4	1	0	0	0	0	0	0	1	0	1	1	1	1	0	0	0	0	0	0	0	66	1	1	96	0	1	37.1667	0	1	63.3333	0	1	1.36	0	1	260	0	1	1	0	1	129	1	1
1	1	14	0	0-60	4	1	0	0	0	0	0	0	0	0	0	0	0	0	1	1	0	0	1	0	0	51	0	1	98	0	1	36.2222	0	1	81.3333	0	1	3.93	1	1	459	0	1	1.3	1	1	108	1	1
1	1	3	0	0-60	1	1	0	0	0	0	0	0	0	0	0	0	0	0	0	0	0	0	0	0	0	51	0	1	96	0	1	37.3889	0	1	72.3333	0	1	0.56	0	1	148	1	1	1	0	1	13	0	1
1	1	3	0	0-60	1	0	0	0	1	0	0	0	0	0	0	0	0	0	0	0	0	0	0	0	0	58	0	1	99	0	1	37.4444	0	1	92.3333	0	0	0	0	1	228	0	1	1.3	0	1	11	0	1
1	1	6	0	0-60	1	1	0	0	0	1	0	0	1	0	0	0	1	0	0	0	0	0	0	0	0	30	0	1	94	0	1	37.2222	0	1	99.3333	0	1	1.96	0	1	256	0	0	0	0	1	14	0	1
1	1	4	0	>80	3	0	0	0	1	0	0	0	0	0	0	0	0	0	0	0	0	0	0	0	0	87	3	1	96	0	1	37.7778	0	1	81.3333	0	0	0	0	1	194	0	1	1.1	0	1	20	0	1
1	1	2	0	0-60	1	0	0	0	1	0	0	0	0	1	0	1	1	1	0	0	0	0	0	0	0	51	0	1	96	0	1	36.6111	0	1	96.6667	0	0	0	0	1	181	0	1	1	0	1	14	0	1
1	1	4	0	>80	7	0	0	0	1	0	0	0	0	0	0	0	0	0	0	0	0	0	0	0	0	86	3	1	93	1	1	36.7778	0	1	87.3333	0	1	0.91	0	1	305	0	1	1.3	0	1	100	1	1
1	1	11	0	>80	5	0	1	0	0	0	0	0	0	0	0	0	0	0	1	1	0	0	0	0	0	86	3	1	97	0	1	38.9444	1	1	96.6667	0	1	2.49	0	1	111	1	1	1.1	0	1	20	0	1
1	1	8	1	>80	7	0	0	1	0	0	0	0	0	0	0	0	0	0	0	0	0	0	0	0	0	83	3	1	100	0	1	38.3333	1	1	84	0	1	2.98	0	1	148	1	1	1.2	0	1	48	1	1
1	1	13	1	>60	5	1	0	0	0	0	0	0	0	0	0	1	1	1	1	1	0	0	0	0	0	69	1	1	100	0	1	37.3333	0	1	94	0	1	1.01	0	1	138	1	1	1.1	0	0	0	0	1
1	1	5	0	>80	3	1	0	0	0	0	0	0	0	0	0	0	0	0	0	0	0	0	0	0	0	91	3	1	99	0	1	36.3333	0	1	104	0	1	1.99	0	1	258	0	1	1.2	0	1	25	0	1
1	1	6	0	>60	2	0	0	0	1	0	2	0	1	0	0	0	0	0	0	0	0	0	0	0	0	69	1	1	94	0	1	37.1111	0	1	101.333	0	1	1.14	0	1	336	0	1	1	0	1	20	0	1
1	1	5	1	>70	8	0	1	0	0	0	1	0	1	0	0	0	0	1	0	0	0	0	0	0	0	73	2	1	87	1	1	37.4444	0	1	42.3333	1	1	8.49	1	1	103	1	1	1	1	1	22	0	1
1	1	4	0	>80	7	1	0	0	0	0	0	0	0	0	0	0	0	0	0	0	0	0	0	0	0	87	3	1	97	0	1	36.9444	0	1	88	0	1	2.11	0	1	105	1	1	1.3	0	0	0	0	1
1	0	0	0	>60	1	1	0	0	0	0	0	0	0	0	0	0	0	0	0	0	0	0	0	0	0	70	1	1	99	0	1	38.2778	1	1	92.3333	0	1	1.13	0	1	268	0	1	1	0	1	17	0	1
1	1	1	1	>60	6	0	0	0	1	0	0	0	0	0	0	0	0	0	0	0	0	0	0	0	0	67	1	1	92	1	1	37.8333	0	1	74.6667	0	1	0.99	0	1	80	2	1	1.8	0	0	0	0	1
1	1	6	0	>80	6	1	0	0	0	0	0	0	0	0	0	1	1	1	1	1	0	0	0	0	0	84	3	1	56	1	1	36.3333	0	1	56.6667	0	1	3.14	1	1	604	0	1	1.3	1	1	19	0	1
1	1	5	0	0-60	3	1	0	0	0	1	1	1	1	0	0	0	1	1	0	0	0	0	0	0	0	60	0	1	97	0	1	38.3333	1	1	86.6667	0	1	1.16	0	1	180	0	1	1.1	0	1	34	1	1
1	1	5	0	0-60	6	0	0	0	1	0	0	1	1	0	1	0	0	0	0	0	0	0	0	0	0	54	0	1	90	1	1	37.2222	0	1	102.667	0	1	2.76	0	1	105	1	1	1	0	1	60	1	1
1	0	0	0	>70	6	1	0	0	0	0	0	0	0	0	0	0	0	0	0	0	0	0	0	0	0	76	2	1	91	1	1	36.7778	0	1	99.6667	0	1	1.52	0	1	372	0	1	1.1	0	1	90	1	1
1	1	4	0	0-60	1	0	1	0	0	0	0	0	0	0	0	0	0	0	0	0	0	0	0	0	0	58	0	1	92	1	1	36.6111	0	1	68.3333	0	1	0.72	0	1	189	0	1	1.1	0	1	12	0	1
1	1	8	1	>60	7	0	0	0	1	0	0	0	1	1	0	1	1	1	0	0	0	0	0	0	0	68	1	1	98	0	1	39.5	1	1	69	0	1	4.33	1	1	188	0	1	1.4	1	1	59	1	1
1	1	7	1	>60	3	0	0	0	1	0	0	0	0	0	0	1	1	1	1	0	1	0	0	0	0	67	1	1	94	0	1	37.6111	0	1	81.3333	0	1	2.2	0	1	249	0	1	1	0	1	17	0	1
1	1	49	0	>60	6	0	0	0	1	0	0	0	1	1	0	0	0	1	1	1	0	0	0	1	0	64	1	1	100	0	1	36.7222	0	1	83.3333	0	1	0.54	0	1	9	2	1	1.2	0	1	38	1	1
1	1	11	1	>80	5	0	0	0	1	0	0	0	0	0	0	1	1	1	0	0	0	0	0	0	0	88	3	1	94	0	1	37	0	1	89	0	0	0	0	1	186	0	1	1.1	0	1	58	1	1
1	1	23	0	>60	4	0	0	0	0	0	0	0	0	0	0	0	0	0	0	0	0	0	0	0	0	61	1	1	93	1	1	39.6111	1	1	77.3333	0	1	9.1	1	1	166	0	1	1	1	1	18	0	1
1	1	6	0	>60	3	1	0	0	0	0	0	0	0	0	1	1	1	1	0	0	0	0	0	0	0	63	1	1	96	0	1	37.0556	0	1	95.6667	0	1	1.18	0	1	149	1	1	1.1	0	1	23	0	1
1	1	3	0	>60	2	0	0	0	1	0	1	1	0	0	0	0	0	0	0	0	0	0	0	0	0	68	1	1	95	0	1	37.2778	0	1	93	0	1	1.36	0	1	304	0	1	1.1	0	1	19	0	1
1	1	7	0	0-60	1	0	0	0	0	0	0	1	1	1	0	0	0	0	0	0	0	0	0	0	0	48	0	1	94	0	1	37.7222	0	1	91	0	1	0.72	0	1	182	0	1	1	0	1	10	0	1
1	1	9	0	0-60	3	0	0	0	1	0	1	0	0	0	0	0	0	0	0	0	0	0	0	0	0	38	0	1	100	0	1	37.1111	0	1	74	0	1	4.87	1	1	1181	0	1	1.4	1	1	21	0	1
1	1	6	0	0-60	4	1	0	0	0	0	0	0	0	1	0	1	1	1	0	0	0	0	0	0	0	60	0	1	91	1	1	38.5556	1	1	76.6667	0	0	0	0	1	148	1	1	1	0	1	16	0	1
1	1	5	0	0-60	0	1	0	0	0	0	1	0	0	1	0	0	0	0	1	1	0	0	0	1	0	52	0	1	94	0	1	39.3889	1	1	101	0	1	0.92	0	1	254	0	1	1.1	0	1	11	0	1
1	1	5	0	>70	4	1	0	0	1	0	1	0	0	1	0	1	1	1	0	0	0	0	0	0	0	80	2	1	88	1	1	37.0556	0	1	74.3333	0	1	2.69	0	1	244	0	1	1.2	0	1	24	0	1
1	0	0	0	>60	3	0	0	1	0	0	0	0	1	1	0	0	0	0	1	1	0	0	0	0	0	65	1	1	93	1	1	39.4444	1	1	98	0	1	0.67	0	1	150	0	1	1	0	1	17	0	1
1	0	0	0	0-60	2	1	0	0	0	0	1	0	1	0	0	0	0	0	0	0	0	0	0	0	0	57	0	1	91	1	1	37	0	1	95	0	1	1.9	0	1	157	0	1	1.2	0	1	31	1	1
1	1	6	0	>60	1	1	0	0	0	0	0	0	0	0	1	0	0	0	1	1	0	0	0	0	0	65	1	1	94	0	1	37.4444	0	1	108.333	0	0	0	0	1	407	0	1	1	0	1	11	0	1
1	1	2	1	>80	7	0	0	0	1	0	0	0	0	0	0	0	0	0	0	0	0	0	0	0	0	82	3	1	95	0	1	36.8889	0	1	93.3333	0	0	0	0	1	128	1	1	1.2	0	1	125	1	1
1	1	15	0	>60	2	1	0	0	0	0	0	1	0	1	1	1	1	1	0	0	0	0	0	0	0	65	1	1	94	0	1	36.7778	0	1	124.667	0	0	0	0	1	397	0	1	1	0	1	31	1	1
1	1	4	0	0-60	1	0	0	0	1	0	0	0	0	0	1	0	0	0	0	0	0	0	0	0	0	50	0	1	94	0	1	37.1667	0	1	82	0	1	0.88	0	1	358	0	1	1.1	0	1	13	0	1
1	1	7	1	>80	4	0	0	0	1	0	0	0	1	0	0	0	0	1	0	0	0	0	0	0	0	88	3	1	100	0	1	36.5	0	1	93.6667	0	1	0.26999	0	1	197	0	1	1	0	1	36	1	1
1	1	2	0	>70	2	0	1	0	0	0	0	0	0	0	0	0	0	0	0	0	0	0	0	0	0	74	2	1	100	0	1	36	0	1	92.6667	0	0	0	0	1	297	0	1	1.1	0	1	22	0	1
1	1	8	0	>60	8	0	0	0	1	0	0	1	0	1	0	1	1	1	0	0	0	0	0	0	0	68	1	1	88	1	1	37.5	0	1	103.333	0	1	20	1	1	285	0	1	1.4	1	1	69	1	1
1	1	2	0	>70	2	0	0	0	0	0	0	0	0	0	0	0	0	0	0	0	0	0	0	0	0	72	2	1	100	0	1	36.8333	0	1	99.6667	0	1	0.79	0	1	218	0	1	1	0	1	10	0	1
1	1	6	0	>80	7	0	0	1	1	0	1	1	1	1	0	0	0	0	1	1	0	0	0	0	0	83	3	1	93	1	1	37.8333	0	1	89.6667	0	1	20	1	1	212	0	1	1.1	1	1	32	1	1
1	1	4	0	>60	2	1	0	0	0	0	0	0	0	0	0	0	0	1	0	0	0	0	0	0	0	63	1	1	99	0	1	37.6111	0	1	78.3333	0	1	2.17	0	1	181	0	1	1.2	0	1	24	0	1
1	1	3	1	>80	5	0	1	0	1	0	0	0	1	0	0	0	0	0	0	0	0	0	0	0	0	86	3	1	82	1	1	36.9444	0	1	76.6667	0	1	0.7	0	1	240	0	1	1	0	1	59	1	1
1	1	26	0	>60	4	0	0	0	1	0	1	0	0	0	1	1	1	1	0	0	0	0	0	0	0	64	1	1	70	1	1	37.5	0	1	86.6667	0	1	0.79	0	1	125	1	1	1.2	0	0	0	0	1
1	1	3	0	>80	5	1	0	0	0	0	0	0	0	0	0	0	0	0	1	1	0	0	0	1	0	89	3	1	96	0	1	37.0556	0	1	114.333	0	0	0	0	1	209	0	1	1	0	1	22	0	1
1	1	17	0	>80	8	0	1	0	0	0	0	0	0	0	0	0	0	0	0	0	0	0	0	0	0	89	3	1	88	1	1	37.4444	0	1	110	0	1	9.56	1	1	279	0	1	1.2	1	1	109	1	1
1	1	11	1	>70	4	0	1	0	0	0	0	0	0	0	0	0	0	0	0	0	0	0	0	0	0	77	2	1	96	0	1	40.3333	1	1	53	0	0	0	0	1	151	0	1	1.3	0	1	30	0	1
1	1	1	1	>80	5	0	0	0	1	0	0	0	0	0	1	0	0	0	0	0	0	0	0	0	0	82	3	1	84	1	1	36.8889	0	1	85.6667	0	0	0	0	1	227	0	1	1.1	0	1	21	0	1
1	1	3	0	0-60	2	0	0	0	1	0	1	0	0	0	0	1	1	1	0	0	0	0	0	0	0	54	0	1	91	1	1	39.1667	1	1	89.3333	0	1	0.54	0	1	237	0	1	1.1	0	1	8	0	1
1	1	10	0	>60	3	1	0	0	0	0	0	0	0	0	1	0	0	0	0	0	0	0	0	0	0	64	1	1	91	1	1	36.9444	0	1	106.333	0	1	2.75	0	1	329	0	1	1	0	1	36	1	1
1	1	1	0	0-60	1	0	0	0	0	0	0	0	1	0	0	1	1	1	0	0	0	0	0	0	0	49	0	1	95	0	1	37.3889	0	1	89	0	1	0.3	0	1	180	0	1	1.1	0	1	15	0	1
1	1	5	0	>60	2	1	0	0	0	0	1	0	0	1	0	0	0	1	1	1	0	0	0	1	0	61	1	1	96	0	1	36.6667	0	1	121	0	1	2.75	0	1	268	0	1	1	0	1	38	1	1
1	1	6	0	>80	4	1	0	0	0	0	0	0	0	0	0	0	0	0	0	0	0	0	0	0	0	83	3	1	96	0	1	36.7778	0	1	92	0	1	2.23	0	1	276	0	1	1	0	1	11	0	1
1	1	7	1	>80	9	0	0	0	1	0	0	1	0	1	0	1	1	1	0	0	0	0	0	0	0	86	3	1	71	1	1	37.1111	0	1	81	0	1	7.92	1	1	251	0	1	2.9	1	1	35	1	1
1	1	3	0	0-60	3	0	0	0	1	0	0	0	0	1	1	0	0	0	0	0	0	0	0	0	0	52	0	1	100	0	1	37.1111	0	1	100	0	0	0	0	1	92	2	1	1.4	0	1	7	0	1
1	1	7	1	>70	7	0	0	0	1	0	0	0	0	0	0	0	0	0	0	0	0	0	0	0	0	75	2	1	84	1	1	36.7222	0	1	45.3333	1	1	20	1	1	150	0	1	1.4	1	0	0	0	1
1	1	36	0	0-60	0	1	0	0	0	0	1	0	0	0	0	0	0	0	0	0	0	0	0	0	0	30	0	1	100	0	1	36.6667	0	1	101.333	0	0	0	0	1	251	0	1	1	0	1	20	0	1
1	1	17	0	>70	6	1	0	0	0	0	0	1	0	1	0	1	1	1	0	0	0	0	0	0	0	76	2	1	91	1	1	36.8333	0	1	93.3333	0	1	1.66	0	1	133	1	0	0	0	1	20	0	1
1	1	1	0	0-60	1	0	1	0	0	0	0	1	0	0	1	0	0	0	1	1	0	0	0	0	0	55	0	0	0	1	0	0	0	0	0	0	0	0	0	0	0	0	0	0	0	0	0	0	0
1	1	3	1	0-60	6	1	0	0	0	0	1	0	1	1	0	0	0	0	0	0	0	0	0	0	0	59	0	1	22	1	1	37.7222	0	1	51	1	1	20	1	1	223	0	1	1.2	1	0	0	0	1
1	1	8	0	0-60	1	0	1	0	0	0	0	0	0	0	0	0	0	0	0	0	0	0	0	0	0	59	0	1	97	0	1	37.2222	0	1	78.6667	0	1	0.37	0	1	181	0	1	1.6	0	1	10	0	1
1	1	8	0	>60	3	0	0	0	1	0	0	0	0	0	0	0	0	0	0	0	0	0	0	0	0	68	1	1	95	0	1	37.1667	0	1	89.6667	0	1	0.9	0	1	142	1	1	1.1	0	1	14	0	1
1	1	7	1	>80	7	1	0	0	0	0	0	0	0	0	0	0	0	0	0	0	0	0	0	0	0	95	3	1	97	0	1	38.1111	1	1	51	1	1	3.51	1	1	309	0	1	1.2	1	1	101	1	1
1	1	5	0	>70	3	0	0	0	0	0	1	0	0	0	0	0	0	0	0	0	0	0	0	0	0	72	2	1	95	0	1	36.9444	0	1	86.3333	0	1	1.02	0	1	463	0	1	1.1	0	1	48	1	1
1	1	2	0	0-60	0	0	0	0	1	0	0	0	0	0	0	0	0	0	0	0	0	0	0	0	0	46	0	1	98	0	1	36.8889	0	1	86.6667	0	1	0.54	0	1	330	0	1	1.1	0	1	18	0	1
1	1	4	1	>70	7	0	0	0	1	0	0	0	1	1	0	0	0	1	0	0	0	0	0	0	0	71	2	1	85	1	1	38	0	1	73.6667	0	1	20	1	1	203	0	1	1.1	1	0	0	0	1
1	1	12	0	>60	2	1	0	0	0	0	0	0	1	1	0	0	0	0	1	0	1	0	0	0	0	67	1	1	96	0	1	37.2778	0	1	101.333	0	1	1.84	0	1	186	0	1	1	0	1	15	0	1
1	1	17	1	0-60	1	1	0	0	0	1	0	0	0	0	1	0	1	1	0	0	0	0	0	0	0	54	0	1	97	0	1	36.1111	0	1	44	1	1	1.04	0	1	263	0	1	0.9	0	0	0	0	1
1	0	0	0	>60	1	1	0	0	0	0	0	0	0	0	0	1	1	1	0	0	0	0	0	0	0	64	1	1	96	0	1	35.5556	0	1	90.6667	0	1	2.5	0	0	0	0	1	0.9	0	1	26	0	1
1	1	3	0	>70	3	0	1	0	0	0	0	0	0	0	0	0	0	0	0	0	0	0	0	0	0	72	2	1	95	0	1	37.4444	0	1	72.6667	0	1	1.67	0	1	197	0	1	2.3	0	1	21	0	1
1	1	13	0	0-60	2	0	1	0	1	0	0	0	0	1	0	1	1	0	0	0	0	0	0	0	0	54	0	1	94	0	1	37.2222	0	1	76.3333	0	0	0	0	1	134	1	1	1	0	1	11	0	1
1	1	9	1	>70	2	0	0	0	0	0	0	0	0	0	1	0	0	0	0	0	0	0	0	0	0	71	2	1	95	0	1	36.5556	0	1	69	0	0	0	0	1	213	0	1	1.1	0	1	28	0	1
1	1	8	0	0-60	4	0	0	0	1	0	0	0	0	0	0	0	0	0	0	0	0	0	0	0	0	60	0	1	84	1	1	36.8889	0	1	103	0	1	3.87	1	1	317	0	1	1.1	1	1	15	0	1
1	1	9	1	>70	9	0	0	0	1	0	0	0	0	0	0	0	0	0	0	0	0	0	0	0	0	71	2	1	88	1	1	39.0556	1	1	67	0	1	7.66	1	1	132	1	1	1.3	1	1	274	1	1
1	0	0	0	0-60	4	1	0	0	0	0	0	0	0	1	0	0	0	0	1	1	0	0	0	1	0	60	0	1	94	0	1	36.7778	0	1	93	0	1	4.98	1	1	164	0	1	1.3	1	1	14	0	1
1	1	4	0	>80	5	1	0	0	0	0	0	0	1	0	0	0	0	0	1	1	0	0	0	1	0	81	3	1	98	0	1	36.4444	0	1	95.3333	0	1	1.14	0	1	149	1	1	1.5	0	1	25	0	1
1	1	7	0	>70	3	1	0	0	0	1	1	0	0	0	0	0	1	1	1	1	0	0	1	0	0	72	2	1	95	0	1	36.5	0	1	86	0	1	0.34	0	1	121	1	1	1.1	0	1	19	0	1
1	1	16	0	>80	9	0	0	0	1	0	0	0	1	0	0	0	0	0	0	0	0	0	0	0	0	82	3	1	96	0	1	36.6667	0	1	81	0	1	1.57	0	1	120	1	1	1.3	0	1	42	1	1
1	1	4	0	>70	2	0	0	0	0	0	0	0	0	0	0	0	0	0	0	0	0	0	0	0	0	76	2	1	99	0	1	36.2778	0	1	87	0	1	2.07	0	1	257	0	1	1	0	1	13	0	1
1	1	6	0	>60	4	1	0	0	0	0	0	0	0	0	0	0	0	0	0	0	0	0	0	0	0	65	1	1	91	1	1	37.6111	0	1	80	0	1	0.51	0	1	292	0	1	1	0	1	8	0	1
1	1	7	0	>80	4	0	0	0	1	0	0	0	0	0	0	0	0	0	0	0	0	0	0	0	0	91	3	1	99	0	1	36.6667	0	1	101	0	1	1.19	0	1	302	0	1	1.6	0	1	15	0	1
1	1	14	0	0-60	6	0	0	0	0	0	0	1	1	0	0	0	0	0	1	1	0	0	0	0	0	56	0	1	84	1	1	36.6667	0	1	75.3333	0	1	7.48	1	1	167	0	1	1.4	1	1	219	1	1
1	1	6	1	>80	8	1	0	0	0	0	0	1	1	1	1	1	1	1	0	0	0	0	0	0	0	81	3	1	99	0	1	38.1111	1	1	60.6667	0	1	3.94	1	1	182	0	1	1.4	1	1	27	0	1
1	0	0	0	0-60	1	1	0	0	0	0	1	0	0	0	0	0	0	0	0	0	0	0	0	0	0	53	0	1	95	0	1	37.3333	0	1	88	0	1	20	1	1	326	0	1	1.2	1	1	11	0	1
1	1	11	0	>60	5	1	0	0	0	0	0	0	0	0	0	0	0	1	1	1	0	0	0	1	0	61	1	1	95	0	1	38.2222	1	1	70.6667	0	1	4.17	1	1	115	1	1	1	1	1	15	0	1
1	1	4	0	>80	7	1	0	0	0	0	1	1	1	1	0	1	1	1	0	0	0	0	0	0	0	85	3	1	97	0	1	36.9444	0	1	89.6667	0	1	7.26	1	1	304	0	1	0.9	1	1	71	1	1
1	1	3	0	>60	3	1	0	0	0	0	0	0	0	0	0	1	1	1	0	0	0	0	0	0	0	69	1	1	93	1	1	37.8889	0	1	94.3333	0	0	0	0	1	310	0	0	0	0	1	15	0	1
1	1	6	0	>60	1	0	0	0	0	0	0	0	0	0	0	0	0	0	0	0	0	0	0	0	0	65	1	1	95	0	1	37.5	0	1	82	0	1	0.83	0	1	170	0	1	1.1	0	1	18	0	1
1	1	2	0	0-60	0	0	0	0	0	0	0	0	0	0	0	0	0	0	0	0	0	0	0	0	0	53	0	1	98	0	1	38.3333	1	1	95	0	1	0.82	0	1	339	0	1	1	0	1	12	0	1
1	1	6	1	0-60	5	0	0	0	0	0	0	1	0	0	0	1	1	1	0	0	0	0	0	0	0	58	0	1	89	1	1	36.8889	0	1	89.3333	0	1	6.22	1	1	208	0	1	1.5	1	1	10	0	1
1	1	5	0	0-60	0	1	0	0	0	0	0	0	1	1	1	1	1	1	0	0	0	0	0	0	0	39	0	1	96	0	1	36.9444	0	1	104.333	0	0	0	0	1	207	0	0	0	0	1	16	0	1
1	1	2	0	>60	1	1	0	0	0	0	1	1	1	0	1	1	1	1	0	0	0	0	0	0	0	66	1	1	97	0	1	38.0556	1	1	86	0	1	0.86	0	1	206	0	1	0.9	0	1	11	0	1
1	1	4	0	0-60	1	0	0	0	1	0	0	0	0	0	0	0	0	1	0	0	0	0	0	0	0	37	0	1	99	0	1	36.7222	0	1	93.6667	0	0	0	0	1	176	0	0	0	0	1	26	0	1
1	0	0	0	0-60	0	0	0	0	1	0	1	0	0	0	0	0	0	0	0	0	0	0	0	0	0	59	0	1	99	0	1	36.8333	0	1	74.6667	0	1	0.62	0	1	287	0	1	0.8	0	1	20	0	1
1	1	1	0	>70	3	1	0	0	0	0	0	0	0	0	0	0	0	0	0	0	0	0	0	0	0	75	2	1	93	1	1	36.8889	0	1	87	0	0	0	0	1	195	0	0	0	0	1	24	0	1
1	1	3	0	>80	4	1	0	0	0	0	0	0	0	0	0	0	0	0	0	0	0	0	0	0	0	87	3	0	0	1	1	-17.7778	0	1	88.3333	0	1	0.68	0	1	208	0	0	0	0	1	32	1	1
1	1	6	1	>80	9	0	0	0	1	0	0	0	0	0	0	0	0	0	0	0	0	0	0	0	0	92	3	1	84	1	1	38.1111	1	1	47.6667	1	1	20	1	1	168	0	1	1.2	1	1	103	1	1
1	1	3	0	>60	3	1	0	0	0	0	1	0	1	0	1	0	0	0	0	0	0	0	0	0	0	67	1	1	95	0	1	37.3889	0	1	105.667	0	1	3.65	1	1	207	0	1	1	1	1	59	1	1
1	0	0	0	>80	6	0	1	0	0	0	1	1	1	1	0	0	0	0	0	0	0	0	0	0	0	86	3	1	92	1	1	36.3333	0	1	71	0	1	2.72	0	1	205	0	1	1.1	0	1	62	1	1
1	1	10	1	>80	9	0	0	0	1	1	0	1	1	0	0	0	1	1	1	1	0	0	1	0	0	94	3	1	99	0	1	36.6667	0	1	47.6667	1	0	0	0	1	142	1	1	1	0	1	62	1	1
1	1	11	0	>60	4	0	1	0	0	1	1	0	1	1	0	1	1	1	0	0	0	0	0	0	0	67	1	1	89	1	1	37.4444	0	1	86.3333	0	1	1.2	0	1	232	0	1	1	0	1	20	0	1
1	1	11	0	>70	4	0	0	0	1	0	0	0	0	1	0	0	0	0	0	0	0	0	0	0	0	72	2	1	100	0	1	36.7222	0	1	96.3333	0	0	0	0	1	234	0	1	1	0	1	46	1	1
1	0	0	0	>80	6	0	0	0	1	0	1	1	0	0	0	0	0	0	0	0	0	0	0	0	0	81	3	1	96	0	1	38.6111	1	1	85.3333	0	1	6.84	1	1	196	0	1	1.2	1	1	42	1	1
1	1	7	0	>70	5	0	1	0	0	0	1	0	0	0	0	0	0	0	0	0	0	0	0	0	0	77	2	1	87	1	1	38.5556	1	1	79	0	0	0	0	1	130	1	1	1.1	0	1	15	0	1
1	1	14	1	0-60	5	1	0	0	0	0	0	0	0	0	0	0	0	0	0	0	0	0	0	0	0	55	0	1	97	0	1	36.7222	0	1	78.6667	0	1	0.86	0	1	109	1	1	1.3	0	1	34	1	1
1	1	5	0	>60	4	1	0	0	0	0	0	0	0	0	0	0	0	1	0	0	0	0	0	0	0	66	1	1	93	1	1	39.5	1	1	98	0	1	0.78	0	1	253	0	1	1	0	1	48	1	1
1	0	0	0	>80	4	0	1	0	0	0	1	0	1	0	0	0	0	0	0	0	0	0	0	0	0	83	3	1	98	0	1	36.7222	0	1	99.3333	0	1	0.55	0	1	248	0	1	1.3	0	1	24	0	1
1	1	4	0	>70	5	0	0	0	0	0	0	0	1	0	0	0	0	0	0	0	0	0	0	0	0	74	2	1	97	0	1	38.1667	1	1	100.333	0	1	2.8	0	1	217	0	1	1.1	0	1	76	1	1
1	1	6	1	>70	9	1	0	0	0	0	0	0	0	0	0	0	0	1	0	0	0	0	0	0	0	71	2	1	69	1	1	37.3333	0	1	82.6667	0	1	3.44	1	1	63	2	1	1.2	1	1	35	1	1
1	1	2	0	>70	4	1	0	0	0	0	0	0	0	0	1	0	0	0	0	0	0	0	0	0	0	74	2	1	98	0	1	36.8889	0	1	94.6667	0	1	0.85	0	1	232	0	0	0	0	1	109	1	1
1	1	1	0	>80	3	0	1	0	0	0	0	0	0	0	0	0	0	0	1	1	0	0	1	0	0	87	3	1	96	0	1	36	0	1	88	0	1	0.45	0	1	210	0	1	1.2	0	1	13	0	1
1	1	7	0	>80	3	0	1	0	0	1	1	0	0	0	0	1	1	1	0	0	0	0	0	0	0	92	3	1	100	0	1	37.2222	0	1	82	0	1	1.97	0	1	153	0	0	0	0	1	11	0	1
1	1	10	0	0-60	1	1	0	0	0	0	0	0	1	0	0	0	0	0	1	1	0	0	0	1	0	59	0	1	97	0	1	36.2222	0	1	98.3333	0	1	1.42	0	1	222	0	1	1.2	0	0	0	0	1
1	1	3	0	0-60	4	0	0	0	1	0	2	0	1	0	0	0	0	0	0	0	0	0	0	0	0	57	0	1	98	0	1	37.1111	0	1	108.333	0	1	0.97	0	1	51	2	1	1.2	0	1	62	1	1
1	1	16	1	>70	6	0	0	0	1	0	0	0	0	0	0	0	0	0	0	0	0	0	0	0	0	78	2	1	91	1	1	36.7222	0	1	23.3333	1	1	0.93	0	1	167	0	1	1	0	0	0	0	1
1	1	3	0	0-60	2	0	0	0	1	0	0	0	0	0	0	0	0	0	0	0	0	0	0	0	0	58	0	1	94	0	1	36.8333	0	1	87.6667	0	1	0.49	0	1	260	0	1	1.2	0	1	8	0	1
1	1	9	0	0-60	4	0	1	0	1	0	0	0	0	0	0	0	0	0	0	0	0	0	0	0	0	57	0	1	94	0	1	36.6667	0	1	87	0	1	3.47	1	1	134	1	1	1.2	1	1	95	1	1
1	1	3	0	>70	4	1	0	0	0	0	0	0	1	0	0	0	0	0	0	0	0	0	0	0	0	77	2	1	96	0	1	36.3333	0	1	75.3333	0	0	0	0	1	310	0	1	1.1	0	1	33	1	1
1	1	13	0	>80	4	1	0	0	0	0	0	0	0	0	0	0	0	0	0	0	0	0	0	0	0	86	3	1	98	0	1	36.8333	0	1	95	0	1	0	0	1	250	0	1	1.7	0	1	27	0	1
1	1	8	1	>70	6	0	0	0	0	0	0	0	0	0	0	0	0	0	0	0	0	0	0	0	0	80	2	1	81	1	1	37.2222	0	1	75.3333	0	1	6.57	1	1	200	0	1	1.2	1	0	0	0	1
1	1	4	0	>80	5	1	0	0	0	0	0	1	1	0	1	1	1	1	0	0	0	0	0	0	0	83	3	1	98	0	1	36.8333	0	1	90.6667	0	1	1.95	0	1	181	0	1	1.1	0	0	0	0	1
1	0	0	0	>70	4	0	0	0	1	0	0	0	0	0	0	0	0	0	0	0	0	0	0	0	0	79	2	1	95	0	1	36.8333	0	1	69.3333	0	1	6.22	1	1	230	0	1	1.1	1	1	33	1	1
1	1	8	0	>70	3	0	0	0	1	0	0	0	0	0	0	0	0	0	0	0	0	0	0	0	0	76	2	1	96	0	1	37.1111	0	1	73	0	1	1.25	0	1	146	1	1	1.2	0	1	24	0	1
1	1	2	1	>70	5	0	1	0	0	1	1	0	0	0	0	0	1	1	0	0	0	0	0	0	0	76	2	1	81	1	1	37.6111	0	1	66.3333	0	0	0	0	1	118	1	1	1.8	0	1	16	0	1
1	1	9	0	>70	4	1	0	0	0	0	0	1	0	0	0	0	0	1	0	0	0	0	0	0	0	79	2	1	87	1	1	37.3333	0	1	66	0	1	0.64	0	1	188	0	1	1.1	0	1	13	0	1
1	1	3	0	0-60	0	0	0	0	1	0	0	1	1	0	1	1	1	1	0	0	0	0	0	0	0	42	0	1	99	0	1	38.1111	1	1	82	0	0	0	0	1	158	0	1	1.1	0	1	8	0	1
1	1	5	0	>70	6	0	0	0	1	0	0	1	0	1	0	0	0	0	0	0	0	0	0	0	0	72	2	1	99	0	1	36.2778	0	0	0	0	1	8.05	1	1	185	0	1	1.2	1	1	140	1	1
1	1	4	0	>60	1	1	0	0	0	0	0	0	0	1	0	1	1	1	0	0	0	0	0	0	0	67	1	1	99	0	1	37.2222	0	1	87.3333	0	0	0	0	0	0	0	0	0	0	0	0	0	0
1	1	32	0	0-60	6	1	0	0	0	0	0	0	0	0	0	0	0	1	0	0	0	0	0	0	0	42	0	1	99	0	1	38.2222	1	1	75	0	1	5.99	1	1	93	2	1	1.4	1	1	38	1	1
1	1	4	0	>60	2	1	0	0	0	0	0	0	0	0	0	1	1	1	0	0	0	0	0	0	0	69	1	1	96	0	1	38.3333	1	1	91	0	1	0.85	0	1	176	0	0	0	0	1	10	0	1
1	1	5	0	>60	2	0	0	0	1	0	0	0	0	0	0	0	0	0	0	0	0	0	0	0	0	67	1	1	95	0	1	37.8333	0	1	92.6667	0	1	0.74	0	1	188	0	1	1	0	1	16	0	1
1	1	8	0	0-60	6	0	0	0	1	0	0	0	0	0	0	1	1	1	0	0	0	0	0	0	0	59	0	1	94	0	1	36.6667	0	1	105.333	0	1	7.24	1	1	263	0	1	3.4	1	1	74	1	1
1	1	2	0	0-60	0	0	0	0	1	0	0	0	0	0	0	0	0	0	0	0	0	0	0	0	0	53	0	1	95	0	1	38.2778	1	1	109.667	0	1	0.51	0	1	223	0	1	0.9	0	1	13	0	1
1	1	2	0	0-60	0	0	0	0	1	0	1	0	0	0	0	0	0	0	0	0	0	0	0	0	0	60	0	1	97	0	1	36.6111	0	1	83.3333	0	1	0.5	0	1	169	0	1	1.2	0	1	14	0	1
1	1	8	0	>60	4	0	0	0	0	0	0	0	0	0	0	0	0	0	0	0	0	0	0	0	0	63	1	1	97	0	1	36.5	0	1	93.6667	0	1	5.58	1	1	430	0	1	1.5	1	1	38	1	1
1	1	3	0	0-60	2	0	0	1	0	0	0	0	0	1	0	0	0	0	0	0	0	0	0	0	0	57	0	0	0	1	0	0	0	0	0	0	1	0.83	0	0	0	0	0	0	0	0	0	0	0
1	1	8	0	>70	3	1	0	0	0	0	1	0	0	0	0	1	1	1	0	0	0	0	0	0	0	77	2	1	95	0	1	36.7222	0	1	106.667	0	1	2.46	0	1	194	0	1	1.1	0	1	10	0	1
1	1	5	0	>60	2	1	0	0	0	0	0	0	0	0	0	0	0	0	0	0	0	0	0	0	0	65	1	1	95	0	1	38.7778	1	1	96.6667	0	1	1.49	0	1	278	0	1	1	0	1	10	0	1
1	1	11	1	0-60	4	1	0	0	0	0	1	1	1	0	1	0	0	1	0	0	0	0	0	0	0	33	0	1	92	1	1	36.4444	0	1	75	0	0	0	0	1	182	0	1	1	0	1	68	1	1
1	1	3	0	0-60	0	1	0	0	0	0	0	0	0	1	0	0	0	0	0	0	0	0	0	0	0	45	0	1	96	0	1	37.7222	0	1	80	0	1	0.29	0	1	299	0	1	1.1	0	1	8	0	1
1	1	4	0	>80	3	0	0	0	1	0	1	0	1	0	0	1	1	1	1	1	0	0	0	1	0	88	3	1	96	0	1	36.5556	0	1	94.3333	0	0	0	0	1	404	0	1	1.1	0	1	26	0	1
1	1	16	1	>80	9	0	0	0	1	1	0	1	1	0	0	0	1	1	1	1	0	0	0	1	0	82	3	1	98	0	1	37.0556	0	1	52.3333	1	1	1.87	0	1	417	0	1	1.4	0	1	24	0	1
1	1	6	1	>80	4	1	0	0	0	0	0	0	0	1	0	1	1	1	1	1	0	0	0	0	0	85	3	1	95	0	1	35.8889	0	1	67.3333	0	1	1.19	0	1	380	0	0	0	0	1	127	1	1
1	1	5	0	>70	4	1	0	0	0	0	0	1	0	0	0	0	0	1	0	0	0	0	0	0	0	79	2	1	98	0	1	36.7778	0	1	84	0	1	8.5	1	1	276	0	1	1.2	1	0	0	0	1
1	1	8	0	>80	7	1	0	0	0	0	1	0	0	0	0	0	0	0	1	1	0	0	0	0	0	83	3	1	96	0	1	36.7778	0	1	85	0	1	20	1	1	216	0	1	1.2	1	1	88	1	1
1	1	10	0	>80	6	0	0	0	1	0	0	0	0	1	0	0	0	0	0	0	0	0	0	0	0	90	3	1	95	0	1	37.1111	0	1	91.6667	0	1	2.14	0	1	175	0	1	1.1	0	1	122	1	1
1	1	3	0	>60	2	1	0	0	0	1	0	1	1	0	0	0	1	1	1	1	0	0	1	0	0	69	1	1	92	1	1	39.4444	1	1	97.3333	0	0	0	0	1	339	0	1	1	0	1	15	0	1
1	1	8	1	0-60	5	0	0	0	1	0	0	0	0	0	0	0	0	1	0	0	0	0	0	0	0	47	0	1	84	1	1	38.4444	1	1	58.6667	1	1	1.13	0	1	169	0	1	1.2	0	0	0	0	1
1	1	4	1	>60	7	1	0	0	0	1	1	1	0	1	0	0	1	1	0	0	0	0	0	0	0	65	1	1	86	1	1	36.8889	0	1	82.6667	0	0	0	0	1	146	1	1	1.3	0	1	56	1	1
1	0	0	0	>60	4	0	0	0	1	0	0	0	0	0	0	0	0	0	0	0	0	0	0	0	0	69	1	1	93	1	1	37.2778	0	1	71.3333	0	1	1.39	0	1	233	0	1	1	0	1	15	0	1
1	1	3	1	>70	4	1	0	0	1	0	0	0	0	0	0	0	0	0	0	0	0	0	0	0	0	80	2	1	97	0	1	39	1	1	88.3333	0	1	3.43	1	1	330	0	1	1.2	1	1	24	0	1
1	1	23	0	>60	4	1	0	0	1	0	0	1	1	0	0	0	0	1	0	0	0	0	0	0	0	68	1	1	93	1	1	36.8889	0	1	107.333	0	1	1.84	0	1	200	0	1	1	0	0	0	0	1
1	1	5	1	>80	9	0	0	0	0	0	0	0	1	0	0	0	0	1	0	0	0	0	0	0	0	82	3	1	90	1	1	37.4444	0	1	50	1	1	6.11	1	1	238	0	1	1.2	1	1	55	1	1
1	1	5	1	>70	3	1	0	0	0	0	0	0	0	0	0	1	1	1	0	0	0	0	0	0	0	80	2	1	95	0	1	37.2778	0	1	109.667	0	0	0	0	1	230	0	1	1.1	0	1	13	0	1
1	1	2	0	0-60	1	0	0	0	1	0	0	0	1	0	0	0	0	0	0	0	0	0	0	0	0	55	0	1	95	0	1	37.6667	0	1	92.3333	0	1	0.84	0	1	208	0	1	1.2	0	1	30	0	1
1	1	3	0	0-60	0	1	0	0	0	0	0	0	0	0	0	0	0	0	0	0	0	0	0	0	0	57	0	1	97	0	1	37	0	1	103.333	0	1	0.63	0	1	261	0	1	0.9	0	1	11	0	1
1	0	0	0	0-60	2	1	0	0	0	0	0	0	0	0	1	0	0	0	0	0	0	0	0	0	0	28	0	1	84	1	1	37	0	1	86	0	1	0.46	0	1	168	0	1	1.2	0	1	17	0	1
1	1	1	0	0-60	0	1	0	0	0	0	0	0	0	0	0	0	0	0	0	0	0	0	0	0	0	55	0	1	100	0	1	38.8333	1	1	92	0	1	0.57	0	1	169	0	1	1	0	1	6	0	1
1	1	1	0	0-60	0	0	0	0	1	0	0	0	0	0	0	0	0	0	0	0	0	0	0	0	0	42	0	1	95	0	1	39.1667	1	1	100	0	1	0.77	0	1	279	0	1	1	0	1	11	0	1
1	1	6	0	>80	6	1	0	0	0	0	0	0	0	0	0	0	0	0	0	0	0	0	0	0	0	81	3	1	100	0	1	37.0556	0	1	83.3333	0	1	1.18	0	1	174	0	1	1.3	0	1	90	1	1
1	1	3	0	>70	4	0	1	0	0	0	0	0	1	0	0	0	0	1	0	0	0	0	0	0	0	75	2	1	92	1	1	36.4444	0	1	74.3333	0	0	0	0	1	226	0	1	1.1	0	1	35	1	1
1	1	3	0	0-60	0	0	0	0	1	0	0	0	0	0	0	0	0	1	0	0	0	0	0	0	0	50	0	1	96	0	1	37.0556	0	1	72.3333	0	0	0	0	1	470	0	1	1	0	1	8	0	1
1	1	21	0	>70	5	0	0	0	1	0	1	0	0	0	0	0	0	0	0	0	0	0	0	0	0	72	2	1	86	1	1	37.6111	0	1	84.3333	0	1	1.2	0	1	166	0	1	1	0	1	14	0	1
1	1	1	0	>60	3	0	0	0	1	0	1	0	0	0	0	0	0	0	0	0	0	0	0	0	0	69	1	1	96	0	1	36.8333	0	1	86.3333	0	1	0.41	0	1	93	2	1	1.1	0	1	25	0	1
1	1	10	1	>70	3	0	0	0	1	0	1	0	1	1	1	0	0	1	0	0	0	0	0	0	0	73	2	1	99	0	1	36.5	0	0	0	0	0	0	0	1	380	0	1	1.3	0	1	24	0	1
1	1	7	0	0-60	3	0	0	0	0	0	0	1	1	1	0	1	1	1	0	0	0	0	0	0	0	57	0	1	97	0	1	38.0556	1	1	92.6667	0	1	1.51	0	1	113	1	1	1.1	0	1	9	0	1
1	1	3	1	>80	8	0	0	0	1	0	0	0	0	0	0	0	0	0	1	1	0	0	0	1	0	86	3	1	95	0	1	39	1	1	95	0	0	0	0	1	96	2	1	1	0	1	32	1	1
1	0	0	0	>80	6	1	0	0	0	0	0	0	0	0	0	0	0	0	1	1	0	0	0	0	0	81	3	1	99	0	1	37.0556	0	1	77	0	0	0	0	1	284	0	1	17.0001	0	1	28	0	1
1	1	6	0	>60	2	0	0	0	1	0	0	0	0	0	0	0	0	0	1	1	0	0	1	0	0	67	1	0	0	1	0	0	0	0	0	0	0	0	0	1	150	0	1	1.1	0	1	18	0	1
1	1	12	0	>60	2	1	0	0	0	0	1	1	0	1	0	1	1	1	0	0	0	0	0	0	0	69	1	1	94	0	1	37.2222	0	1	93	0	0	0	0	1	206	0	1	1.6	0	1	11	0	1
1	1	2	0	0-60	0	1	0	0	0	0	0	0	0	1	0	0	0	0	1	1	0	0	0	0	0	49	0	1	99	0	1	36.6667	0	1	115.667	0	1	0.26999	0	1	210	0	1	1.1	0	1	8	0	1
1	1	7	0	0-60	2	1	0	0	0	0	0	0	1	0	1	0	0	0	0	0	0	0	0	0	0	58	0	1	100	0	1	37.6667	0	1	102.667	0	0	0	0	1	239	0	1	1.2	0	1	66	1	1
1	0	0	0	0-60	3	0	0	0	1	0	1	0	0	0	0	0	0	0	0	0	0	0	0	0	0	47	0	1	92	1	1	39.6111	1	1	82.3333	0	1	0.52	0	1	140	1	1	1.2	0	1	13	0	1
1	0	0	0	>80	3	1	0	0	0	0	1	0	0	1	0	0	0	0	0	0	0	0	0	0	0	91	3	1	100	0	1	38	0	1	91.3333	0	0	0	0	1	305	0	1	1	0	1	15	0	1
1	1	6	1	>70	6	1	0	0	0	0	0	0	0	1	0	0	0	0	0	0	0	0	0	0	0	73	2	1	99	0	1	38	0	1	72.3333	0	1	1.06	0	1	132	1	1	1.2	0	1	31	1	1
1	1	5	0	>80	5	1	0	0	0	0	0	0	0	0	0	0	0	0	0	0	0	0	0	0	0	91	3	1	91	1	1	36.5556	0	1	80.6667	0	1	18.23	1	1	181	0	1	1.1	1	1	8	0	1
1	1	11	0	0-60	3	0	0	0	1	0	0	0	1	0	0	0	0	0	0	0	0	0	0	0	0	51	0	1	86	1	1	37.4444	0	1	89.3333	0	1	1.64	0	1	255	0	1	1.1	0	1	25	0	1
1	1	6	1	>70	4	0	1	0	0	0	0	0	0	0	1	0	0	0	0	0	0	0	0	0	0	79	2	1	84	1	1	36.8333	0	1	101	0	1	1.76	0	1	166	0	1	1.1	0	1	22	0	1
1	1	3	0	0-60	0	0	0	0	1	0	0	0	0	0	0	0	0	0	0	0	0	0	0	0	0	35	0	1	94	0	1	37.4444	0	1	95	0	1	0.92	0	1	241	0	1	1.1	0	1	13	0	1
1	1	12	1	>80	9	1	0	0	0	0	0	0	1	0	0	0	0	0	0	0	0	0	0	0	0	83	3	1	92	1	1	37.1667	0	1	42	1	1	19.1	1	1	160	0	1	1.2	1	1	19	0	1
1	1	4	1	>70	4	0	0	0	1	1	0	0	0	1	0	1	1	1	0	0	0	0	0	0	0	72	2	1	95	0	1	37.6111	0	1	44.6667	1	0	0	0	1	260	0	1	1.1	0	1	33	1	1
1	1	5	1	>80	5	0	0	0	1	0	0	0	0	0	1	0	0	1	0	0	0	0	0	0	0	85	3	1	94	0	1	38.9444	1	1	90	0	0	0	0	1	167	0	1	1.1	0	1	17	0	1
1	1	3	0	>80	3	0	0	0	1	0	0	1	0	0	1	0	0	1	0	0	0	0	0	0	0	90	3	1	100	0	1	36.2222	0	1	70.3333	0	0	0	0	1	240	0	1	1.2	0	1	21	0	1
1	1	12	1	>60	3	1	0	0	0	0	0	0	0	0	0	0	0	0	0	0	0	0	0	0	0	62	1	1	96	0	1	36.9444	0	1	112	0	1	2.93	0	1	292	0	1	0.9	0	1	7	0	1
1	1	9	0	>80	4	0	0	0	1	0	0	0	0	0	1	1	1	0	0	0	0	0	0	0	0	88	3	1	95	0	1	36.2778	0	1	87	0	0	0	0	1	196	0	1	1.5	0	1	21	0	1
1	1	1	0	>70	2	0	0	0	1	0	1	0	0	1	0	0	0	0	0	0	0	0	0	0	0	77	2	1	100	0	1	36.9444	0	1	80.3333	0	1	1.37	0	1	290	0	1	1.1	0	1	12	0	1
1	1	6	1	>80	6	0	1	0	0	0	0	0	1	0	0	0	0	1	0	0	0	0	0	0	0	85	3	1	93	1	1	37.2222	0	1	81.3333	0	1	1.04	0	1	192	0	1	2.2	0	1	32	1	1
1	1	3	1	>80	9	1	0	0	0	0	1	1	1	0	0	0	0	1	1	1	0	0	0	0	0	82	3	1	100	0	1	36.7778	0	1	46.6667	1	1	4.09	1	1	163	0	1	1.3	1	1	54	1	1
1	1	5	0	>60	3	1	0	0	0	0	0	1	1	0	0	1	1	1	0	0	0	0	0	0	0	61	1	1	97	0	1	37.1111	0	1	106.333	0	1	1.37	0	1	423	0	0	0	0	1	18	0	1
1	1	14	1	>60	6	1	0	0	0	0	0	1	0	1	1	0	0	1	0	0	0	0	0	0	0	65	1	1	89	1	1	37.2778	0	1	35.6667	1	1	20	1	1	133	1	1	1.1	1	0	0	0	1
1	1	1	0	>70	3	0	0	0	1	0	1	1	0	0	0	1	1	1	0	0	0	0	0	0	0	71	2	1	95	0	1	37.1111	0	1	76	0	1	0.28	0	1	296	0	1	1	0	1	9	0	1
1	1	7	0	>60	4	0	0	0	1	0	0	0	1	0	0	0	0	0	0	0	0	0	0	0	0	64	1	1	100	0	1	39.3333	1	1	74.3333	0	1	2.93	0	1	208	0	1	1.2	0	1	69	1	1
1	1	4	0	>60	4	1	0	0	0	0	0	0	0	0	0	0	0	0	0	0	0	0	0	0	0	62	1	1	93	1	1	37.2778	0	1	95	0	1	13.68	1	1	214	0	1	1	1	1	17	0	1
1	1	4	0	0-60	1	0	0	0	1	0	0	0	0	1	0	0	0	0	0	0	0	0	0	0	0	29	0	1	99	0	1	39.0556	1	1	83	0	1	0.42	0	1	240	0	1	1	0	1	10	0	1
1	1	4	0	0-60	3	0	0	0	0	0	0	0	0	0	0	0	0	0	0	0	0	0	0	0	0	52	0	1	92	1	1	37.1667	0	1	80.3333	0	1	5.41	1	1	214	0	1	1.2	1	1	8	0	1
1	1	2	0	0-60	5	1	0	0	0	0	0	1	0	0	1	1	1	1	0	0	0	0	0	0	0	47	0	1	88	1	1	38.0556	1	1	108	0	1	4.55	1	1	107	1	1	1	1	1	11	0	1
1	1	31	1	0-60	3	0	0	0	1	0	0	0	0	0	0	1	1	1	0	0	0	0	0	0	0	53	0	1	55	1	1	37.4444	0	1	81.3333	0	1	1	0	1	189	0	1	1.1	0	0	0	0	1
1	1	2	0	>70	2	0	0	0	1	0	0	0	0	0	0	0	0	0	0	0	0	0	0	0	0	72	2	1	96	0	1	36.5556	0	1	76.3333	0	1	1.11	0	1	273	0	1	1.1	0	1	19	0	1
1	1	5	0	>60	2	0	1	0	0	0	0	0	0	0	0	0	0	0	1	1	0	0	1	0	0	68	1	1	100	0	1	38.3333	1	1	72	0	1	0.47	0	1	238	0	1	1.8	0	1	14	0	1
1	1	3	0	>60	2	1	0	0	0	0	0	0	0	0	0	0	0	0	0	0	0	0	0	0	0	70	1	1	97	0	1	36.6111	0	1	100	0	1	7.01	1	1	223	0	1	1.2	1	0	0	0	1
1	1	25	1	0-60	1	0	0	0	1	0	1	1	1	1	1	1	1	1	0	0	0	0	0	0	0	57	0	1	97	0	1	37.1667	0	1	62	1	1	0.59	0	1	400	0	1	1.1	0	0	0	0	1
1	1	1	0	>70	3	0	0	0	1	1	0	1	0	0	0	1	1	1	0	0	0	0	0	0	0	71	2	1	99	0	1	36.2222	0	1	103.333	0	1	0.39	0	1	214	0	1	1.1	0	1	7	0	1
1	1	4	0	0-60	2	1	0	0	0	0	0	0	0	0	0	0	0	0	0	0	0	0	0	0	0	60	0	1	93	1	1	37.0556	0	1	121	0	1	1.14	0	1	168	0	1	1	0	1	12	0	1
1	1	5	0	>80	5	1	0	0	0	0	0	1	0	1	0	0	0	0	0	0	0	0	0	0	0	84	3	1	95	0	1	36.7778	0	1	97	0	0	0	0	1	117	1	1	1.1	0	1	17	0	1
1	1	3	0	>70	6	1	0	0	0	0	0	1	0	0	1	0	0	1	0	0	0	0	0	0	0	77	2	1	92	1	1	37	0	1	74	0	1	11.48	1	1	239	0	1	1.2	1	1	33	1	1
1	1	27	0	>80	5	1	0	0	0	0	0	0	0	0	0	1	1	1	1	1	0	0	0	0	0	91	3	1	100	0	1	37.3333	0	1	80.6667	0	0	0	0	1	272	0	1	1.3	0	1	58	1	1
1	1	7	0	0-60	0	0	0	0	0	0	0	0	0	0	0	0	0	0	0	0	0	0	0	0	0	52	0	1	94	0	1	37.8889	0	1	76	0	0	0	0	1	178	0	0	0	0	1	5	0	1
1	1	5	0	0-60	2	1	0	0	0	0	0	0	0	0	0	0	0	0	0	0	0	0	0	0	0	43	0	1	93	1	1	35	0	1	115	0	1	3.1	1	1	247	0	1	1	1	0	0	0	1
1	1	10	0	>70	4	0	0	0	1	0	0	0	0	0	0	0	0	0	0	0	0	0	0	0	0	73	2	1	94	0	1	38.1111	1	1	98	0	1	1.13	0	1	124	1	1	1.1	0	1	17	0	1
1	1	7	0	>60	2	0	0	0	0	0	0	0	0	0	0	0	0	0	0	0	0	0	0	0	0	62	1	1	100	0	1	38.8333	1	1	69.3333	0	1	2.49	0	1	169	0	1	1	0	1	25	0	1
1	1	4	0	>80	6	1	0	0	0	0	0	0	1	0	0	0	0	1	0	0	0	0	0	0	0	88	3	1	92	1	1	35.7778	0	1	106.667	0	1	2.82	0	1	432	0	1	1.3	0	1	85	1	1
1	1	7	1	>70	8	0	0	0	1	0	0	0	0	0	1	0	0	0	0	0	0	0	0	0	0	80	2	1	92	1	1	37.2778	0	1	83.6667	0	1	1.18	0	1	235	0	1	2.3	0	1	120	1	1
1	1	3	0	>80	3	0	0	0	1	0	0	0	0	0	0	0	0	0	0	0	0	0	0	0	0	86	3	1	96	0	1	36.8889	0	1	76.6667	0	1	0.64	0	1	272	0	1	1	0	1	6	0	1
1	0	0	0	0-60	2	0	0	0	1	0	1	0	0	1	1	0	0	0	1	0	0	1	1	0	0	53	0	0	0	1	0	0	0	0	0	0	0	0	0	0	0	0	1	2.2	0	0	0	0	1
1	0	0	0	>70	4	0	0	1	0	0	0	0	1	1	0	1	1	1	0	0	0	0	0	0	0	72	2	1	97	0	1	37.6667	0	1	110	0	1	1.18	0	1	172	0	1	0.9	0	1	17	0	1
1	1	4	1	>70	6	0	0	0	1	0	0	0	0	0	0	0	0	0	0	0	0	0	0	0	0	79	2	1	100	0	1	37.7222	0	1	59	0	1	0.85	0	1	137	1	1	2	0	1	107	1	1
1	1	3	0	>80	3	1	0	0	0	0	0	0	0	0	0	0	0	0	0	0	0	0	0	0	0	83	3	1	97	0	1	36.5	0	1	79	0	1	1.29	0	1	168	0	1	1.2	0	1	19	0	1
1	1	5	0	0-60	1	0	0	0	1	0	0	0	1	1	1	1	1	1	0	0	0	0	0	0	0	48	0	1	94	0	1	37.7778	0	1	81.3333	0	1	1.51	0	1	185	0	0	0	0	1	17	0	1
1	0	0	0	>60	4	0	0	0	0	0	1	0	0	0	0	0	0	0	0	0	0	0	0	0	0	65	1	1	100	0	1	36.8889	0	1	64	0	1	0.28	0	1	82	2	1	2.7	0	1	19	0	1
1	1	30	1	0-60	7	1	0	0	0	0	0	1	0	0	0	0	0	1	0	0	0	0	0	0	0	40	0	1	92	1	1	39.3333	1	1	94.6667	0	1	4.61	1	1	79	2	1	1.2	1	1	55	1	1
1	1	7	0	>60	4	0	0	0	1	0	0	0	0	0	0	0	0	0	0	0	0	0	0	0	0	70	1	1	83	1	0	0	0	1	69	0	1	1.31	0	1	167	0	1	1	0	1	11	0	1
1	1	6	0	>80	9	1	0	0	0	0	0	0	0	0	0	0	0	0	0	0	0	0	0	0	0	91	3	1	99	0	1	37.9444	0	1	89	0	1	0.89	0	1	64	2	1	1.4	0	0	0	0	1
1	1	15	0	>80	6	1	0	0	0	0	0	0	0	1	0	0	0	0	0	0	0	0	0	0	0	85	3	1	92	1	1	38.3889	1	1	79.3333	0	1	1.9	0	1	235	0	1	1.4	0	1	21	0	1
1	1	14	0	0-60	2	1	0	0	0	0	0	0	1	0	0	1	1	1	0	0	0	0	0	0	0	46	0	1	94	0	1	36.7222	0	1	92	0	1	2.46	0	1	255	0	1	1	0	1	14	0	1
1	1	1	1	>70	9	0	0	1	0	0	0	0	0	0	0	0	0	0	1	1	0	0	0	0	0	79	2	1	92	1	1	39.1111	1	1	83.3333	0	1	1.4	0	1	130	1	1	1.5	0	1	25	0	1
1	1	4	1	>80	7	1	0	0	0	0	0	0	0	0	0	0	0	0	0	0	0	0	0	0	0	92	3	1	86	1	1	36.9444	0	1	87.6667	0	0	0	0	1	189	0	0	0	0	1	81	1	1
1	1	7	0	0-60	2	1	0	0	0	0	1	0	0	1	0	0	0	0	0	0	0	0	0	0	0	55	0	1	92	1	1	37.2778	0	1	108.667	0	1	0.52	0	1	300	0	1	1.1	0	1	13	0	1
1	1	22	1	>80	5	0	0	1	0	0	0	0	0	1	0	1	1	1	0	0	0	0	0	0	0	85	3	1	87	1	1	38.3333	1	1	72.3333	0	1	1.14	0	1	152	0	1	1	0	1	11	0	1
1	1	4	1	0-60	2	0	0	0	1	0	1	1	0	0	0	0	0	1	0	0	0	0	0	0	0	59	0	1	100	0	1	37.3333	0	1	76.3333	0	1	0	0	1	281	0	1	1.2	0	1	59	1	1
1	1	1	0	>60	1	0	1	0	0	0	0	0	1	0	0	0	0	0	0	0	0	0	0	0	0	62	1	1	96	0	1	36.7222	0	1	95.3333	0	1	0.31	0	1	216	0	1	1.1	0	1	17	0	1
1	1	2	0	>70	2	0	0	0	1	0	1	0	0	0	0	0	0	0	0	0	0	0	0	0	0	77	2	1	100	0	1	36	0	1	67.6667	0	1	1.64	0	1	518	0	1	1.1	0	1	23	0	1
1	0	0	0	>80	4	0	1	0	0	0	1	0	0	0	0	0	0	0	0	0	0	0	0	0	0	92	3	1	97	0	1	38	0	1	110	0	1	2.39	0	1	443	0	1	1.4	0	1	36	1	1
1	1	6	0	>60	7	1	0	0	0	0	0	0	0	0	0	0	0	0	0	0	0	0	0	0	0	65	1	1	100	0	1	37.6667	0	1	107.333	0	1	3.54	1	1	219	0	1	1.4	1	1	65	1	1
1	1	2	0	>60	4	1	0	0	0	0	0	0	0	0	0	0	0	0	0	0	0	0	0	0	0	67	1	1	92	1	1	36.9444	0	1	75	0	1	0.78	0	1	274	0	1	1.1	0	1	23	0	1
1	1	7	0	0-60	1	1	0	0	0	0	0	0	0	0	0	0	0	0	0	0	0	0	0	0	0	32	0	1	99	0	1	38.5556	1	1	80.3333	0	1	2.18	0	1	441	0	1	1.2	0	1	10	0	1
1	1	11	1	>60	7	1	0	0	0	0	0	0	0	0	0	0	0	0	0	0	0	0	0	0	0	62	1	1	69	1	1	37	0	1	59.6667	1	1	1.89	0	1	179	0	1	1.1	0	0	0	0	1
1	1	2	0	>70	3	0	0	0	1	0	0	0	0	0	0	0	0	0	0	0	0	0	0	0	0	75	2	1	96	0	1	36.2778	0	1	86.3333	0	1	3.15	1	1	459	0	1	1	1	1	14	0	1
1	1	8	1	>70	5	0	0	0	0	1	0	0	0	1	0	1	1	1	0	0	0	0	0	0	0	73	2	1	91	1	1	36.6667	0	1	98.3333	0	1	0.75	0	1	182	0	1	1.1	0	1	35	1	1
1	1	9	1	>70	4	0	0	0	1	0	0	0	0	0	0	0	0	0	0	0	0	0	0	0	0	77	2	1	96	0	1	37.8889	0	1	75	0	1	3.11	1	1	284	0	1	1	1	1	23	0	1
1	1	3	1	>80	6	0	0	0	1	0	0	0	0	0	0	0	0	0	0	0	0	0	0	0	0	81	3	1	83	1	1	36.8889	0	1	96	0	1	0.82	0	1	193	0	1	1.1	0	0	0	0	1
1	1	9	1	>60	3	1	0	0	0	0	1	0	0	0	0	1	1	1	0	0	0	0	0	0	0	61	1	1	86	1	1	37.0556	0	1	82	0	0	0	0	1	181	0	1	1	0	0	0	0	1
1	1	4	1	>70	8	0	0	0	0	0	0	1	1	1	0	0	0	0	0	0	0	0	0	0	0	72	2	1	92	1	1	37.3333	0	1	50	1	1	2.16	0	1	155	0	1	1.2	0	1	108	1	1
1	1	20	0	>60	3	0	0	0	1	1	0	0	1	1	0	0	1	0	0	0	0	0	0	0	0	70	1	1	88	1	1	37	0	1	76	0	1	5.78	1	1	168	0	1	1	1	1	20	0	1
1	1	13	0	0-60	0	0	0	0	1	0	0	0	0	0	0	0	0	0	0	0	0	0	0	0	0	52	0	1	98	0	1	36.8889	0	1	86.6667	0	1	1.87	0	1	171	0	1	1.1	0	1	19	0	1
1	1	5	0	>60	6	1	0	0	0	0	0	0	0	0	0	0	0	0	0	0	0	0	0	0	0	70	1	1	94	0	1	36.2778	0	1	119.333	0	0	0	0	1	51	2	0	0	0	1	32	1	1
1	1	8	0	>70	3	0	0	0	1	0	0	0	0	0	0	1	1	1	0	0	0	0	0	0	0	77	2	1	95	0	0	0	0	1	103.667	0	1	1.04	0	1	174	0	1	1	0	1	11	0	1
1	1	9	0	>70	6	0	0	0	1	0	0	0	0	1	0	1	1	1	0	0	0	0	0	0	0	71	2	1	90	1	1	36.6667	0	1	94.6667	0	1	6.9	1	1	303	0	1	1.1	1	1	46	1	1
1	1	1	1	>80	3	1	0	0	0	0	0	0	1	0	0	1	1	0	0	0	0	0	0	0	0	84	3	1	98	0	1	36.2778	0	1	80.6667	0	0	0	0	1	351	0	0	0	0	1	9	0	1
1	1	6	1	>60	3	0	0	1	0	0	0	1	0	1	1	0	0	0	0	0	0	0	0	0	0	66	1	1	93	1	1	39.5	1	1	69	0	0	0	0	1	230	0	1	1.1	0	0	0	0	1
1	1	6	0	0-60	2	1	0	0	0	0	0	0	0	0	0	0	0	0	0	0	0	0	0	0	0	59	0	1	92	1	1	35.8333	0	1	85	0	0	0	0	1	398	0	1	1.2	0	1	43	1	1
1	1	6	0	0-60	2	1	0	0	0	0	0	0	0	0	0	0	0	0	0	0	0	0	0	0	0	60	0	1	92	1	1	36.4444	0	1	90.6667	0	1	1.23	0	1	302	0	1	1	0	0	0	0	1
1	1	22	0	0-60	3	0	0	0	0	0	0	0	0	1	0	0	0	0	1	1	0	0	0	1	0	53	0	1	92	1	1	37	0	1	94.6667	0	1	0.91	0	1	131	1	1	1.1	0	1	8	0	1
1	1	2	0	0-60	1	1	0	0	0	0	0	0	0	1	0	0	0	0	0	0	0	0	0	0	0	59	0	1	97	0	1	36.6667	0	1	96.3333	0	0	0	0	1	264	0	1	1	0	1	21	0	1
1	1	7	1	0-60	2	0	0	0	1	0	0	0	0	1	0	0	0	0	0	0	0	0	0	0	0	59	0	1	95	0	1	36.9444	0	1	72.6667	0	1	2.63	0	1	111	1	1	1.1	0	0	0	0	1
1	1	10	1	>80	5	1	0	0	0	0	0	1	0	0	0	1	1	1	0	0	0	0	0	0	0	101	3	1	96	0	1	36.4444	0	1	106	0	1	6.35	1	1	391	0	1	1.1	1	1	32	1	1
1	1	12	1	>70	6	0	0	0	0	0	0	0	1	0	0	1	1	1	1	1	0	0	0	0	0	79	2	1	94	0	1	37.5556	0	1	69.6667	0	1	1.73	0	1	153	0	1	1.1	0	1	59	1	1
1	1	5	0	>80	4	0	0	0	0	0	0	0	0	0	0	0	0	0	0	0	0	0	0	0	0	81	3	1	100	0	1	35.9444	0	1	75.6667	0	1	3.34	1	1	260	0	1	1	1	1	23	0	1
1	1	4	0	0-60	1	1	0	0	0	0	0	0	0	0	0	0	0	0	0	0	0	0	0	0	0	49	0	1	92	1	1	37.3333	0	1	115.333	0	1	0.75	0	1	209	0	1	1.1	0	1	9	0	1
1	1	6	0	>70	3	0	1	0	1	0	0	1	1	0	0	0	0	0	1	1	0	0	0	1	0	76	2	1	95	0	1	35.5556	0	1	79.6667	0	1	10.93	1	1	291	0	1	1.2	1	1	40	1	1
1	1	3	0	0-60	0	0	1	0	0	1	1	0	0	1	0	0	1	1	0	0	0	0	0	0	0	49	0	1	97	0	1	36.7778	0	1	98	0	1	0.75	0	1	441	0	1	1.1	0	1	21	0	1
1	1	3	0	>60	5	0	0	0	1	0	0	0	0	0	0	0	0	0	0	0	0	0	0	0	0	70	1	1	92	1	1	37.4444	0	1	92.3333	0	1	1.53	0	1	140	1	1	1.1	0	1	19	0	1
1	1	1	0	>60	2	0	0	0	1	0	0	0	0	0	0	0	0	0	0	0	0	0	0	0	0	66	1	1	94	0	1	37.8333	0	1	86	0	1	0.56	0	1	209	0	1	1.1	0	1	11	0	1
1	0	0	0	>70	4	1	0	0	0	1	0	0	0	0	0	0	1	0	0	0	0	0	0	0	0	79	2	1	82	1	1	37	0	1	77.6667	0	1	5.39	1	1	187	0	1	1.1	1	1	13	0	1
1	1	3	1	>70	4	0	0	0	0	0	0	0	0	0	0	0	0	1	0	0	0	0	0	0	0	73	2	1	91	1	1	37.2222	0	1	101.667	0	1	0.81	0	1	297	0	1	1	0	1	30	0	1
1	1	12	1	0-60	6	0	0	0	1	0	0	0	0	0	0	0	0	0	0	0	0	0	0	0	0	56	0	1	55	1	1	37.8889	0	1	108.667	0	1	6.22	1	1	254	0	1	1	1	0	0	0	1
1	1	2	1	>60	4	1	0	0	0	0	0	0	0	1	0	0	0	0	0	0	0	0	0	0	0	69	1	1	92	1	1	37.8333	0	1	96.6667	0	1	0.74	0	1	165	0	1	1	0	1	18	0	1
1	1	11	0	>80	5	1	0	0	0	0	0	0	0	0	1	0	0	0	1	1	0	0	0	0	0	86	3	1	94	0	1	37.1667	0	1	82.6667	0	1	1.75	0	1	96	2	1	1.2	0	1	14	0	1
1	1	4	0	>60	3	0	0	0	1	0	0	0	0	0	0	1	1	0	0	0	0	0	0	0	0	61	1	1	96	0	1	37	0	1	90	0	1	0.68	0	1	157	0	1	1.3	0	1	9	0	1
1	1	6	0	>70	4	1	0	0	0	0	0	0	0	0	0	0	0	0	0	0	0	0	0	0	0	72	2	1	92	1	1	36.7222	0	1	90.6667	0	0	0	0	1	208	0	0	0	0	1	14	0	1
1	1	18	0	>70	7	0	0	0	1	0	0	0	0	0	0	0	0	0	0	0	0	0	0	0	0	79	2	1	82	1	1	34.2778	0	1	107.667	0	1	2.37	0	1	171	0	1	1.5	0	0	0	0	1
1	0	0	0	>70	8	1	0	0	0	0	0	0	0	0	0	0	0	0	0	0	0	0	0	0	0	78	2	1	99	0	1	37	0	1	74.3333	0	1	19.1	1	1	130	1	1	1.1	1	1	52	1	1
1	1	8	0	>60	3	0	0	0	0	0	0	0	0	0	0	0	0	0	0	0	0	0	0	0	0	66	1	1	94	0	1	39.1111	1	1	85.3333	0	1	1.62	0	1	159	0	1	1.2	0	1	11	0	1
1	1	28	0	0-60	2	0	1	0	1	0	0	0	1	1	0	0	0	1	0	0	0	0	0	0	0	53	0	1	96	0	1	36.5	0	1	66	0	1	20	1	1	227	0	1	1	1	1	15	0	1
1	1	11	0	0-60	5	0	0	0	0	0	0	0	0	0	0	0	0	0	0	0	0	0	0	0	0	55	0	1	96	0	1	36.5556	0	1	85	0	1	4.83	1	1	88	2	1	1.2	1	1	88	1	1
1	1	6	0	0-60	1	1	0	0	0	0	0	0	0	0	0	0	0	0	0	0	0	0	0	0	0	54	0	1	95	0	1	38.8333	1	1	75.6667	0	1	0.41	0	1	389	0	1	1	0	1	9	0	1
1	1	4	1	0-60	5	0	0	0	1	0	0	0	0	0	0	0	0	1	0	0	0	0	0	0	0	59	0	1	94	0	1	36.5	0	1	110	0	1	7.73	1	1	367	0	1	1.5	1	1	64	1	1
1	1	2	0	0-60	3	1	0	0	0	0	0	0	0	0	0	0	0	0	0	0	0	0	0	0	0	58	0	1	98	0	1	37.3889	0	1	88	0	1	3.13	1	1	236	0	1	1	1	1	18	0	1
1	1	5	0	>60	2	0	0	0	1	0	0	0	0	0	0	0	0	0	0	0	0	0	0	0	0	62	1	1	97	0	1	38.5556	1	1	95	0	1	1.35	0	1	174	0	1	1	0	1	16	0	1
1	1	1	1	>60	6	1	0	0	0	0	0	1	1	0	0	0	0	0	0	0	0	0	0	0	0	63	1	1	100	0	1	36.6111	0	1	106.667	0	1	3.75	1	1	171	0	1	1.9	1	1	91	1	1
1	1	18	1	>60	4	0	1	0	0	0	0	0	0	1	0	1	1	1	0	0	0	0	0	0	0	70	1	1	50	1	1	38.9444	1	1	58.3333	0	1	4.51	1	1	169	0	1	1	1	0	0	0	1
1	1	6	0	0-60	1	1	0	0	0	0	1	0	0	0	0	0	0	0	0	0	0	0	0	0	0	56	0	0	0	1	0	0	0	0	0	0	0	0	0	0	0	0	0	0	0	0	0	0	0
1	1	1	1	0-60	8	1	0	0	0	0	0	1	1	0	0	0	0	1	0	0	0	0	0	0	0	57	0	1	82	1	1	38.8333	1	1	42.6667	1	1	13.46	1	1	112	1	1	1.5	1	1	56	1	1
1	1	3	0	0-60	2	1	0	0	0	0	0	0	0	0	0	0	0	0	0	0	0	0	0	0	0	44	0	1	93	1	1	38.7778	1	1	92	0	1	0.79	0	1	229	0	1	1	0	1	11	0	1
1	1	1	0	0-60	2	0	0	0	1	0	0	0	1	1	0	0	0	0	0	0	0	0	0	0	0	56	0	1	95	0	1	36.4444	0	1	104.667	0	1	1.3	0	1	327	0	1	1	0	1	9	0	1
1	1	8	0	0-60	4	1	0	0	1	0	0	0	0	1	0	0	0	0	0	0	0	0	0	0	0	60	0	1	92	1	1	37.1111	0	1	67.3333	0	1	3.29	1	1	155	0	1	1.2	1	1	13	0	1
1	1	3	1	>70	5	0	0	0	1	0	0	0	0	0	0	0	0	0	0	0	0	0	0	0	0	75	2	1	68	1	1	38.0556	1	1	69	0	0	0	0	1	259	0	1	1.1	0	1	32	1	1
1	1	10	0	>70	6	1	0	0	0	0	0	0	0	0	0	0	0	0	0	0	0	0	0	0	0	75	2	1	94	0	1	37.7778	0	1	77.3333	0	1	10.72	1	1	114	1	1	1	1	1	28	0	1
1	1	6	0	0-60	0	0	0	0	1	0	0	1	0	0	0	1	1	1	0	0	0	0	0	0	0	59	0	1	94	0	1	37.1667	0	1	81.3333	0	0	0	0	1	169	0	1	1	0	1	16	0	1
1	1	3	0	>80	4	1	0	0	0	0	1	0	0	0	0	0	0	0	0	0	0	0	0	0	0	93	3	1	97	0	1	36.6111	0	1	113.667	0	1	7.52	1	1	345	0	1	1	1	1	40	1	1
1	1	25	0	>60	6	1	0	0	0	0	0	0	0	0	0	1	1	0	0	0	0	0	0	0	0	62	1	1	79	1	1	36.6111	0	1	93	0	1	2.45	0	1	247	0	1	1	0	1	62	1	1
1	1	11	0	0-60	4	1	0	0	0	0	0	0	0	0	0	0	0	0	0	0	0	0	0	0	0	58	0	1	82	1	1	37.9444	0	1	86.3333	0	1	20	1	1	407	0	1	1.2	1	1	29	0	1
1	1	5	0	0-60	1	1	0	0	0	0	0	0	0	1	0	1	1	1	0	0	0	0	0	0	0	28	0	0	0	1	0	0	0	0	0	0	1	0.32	0	1	348	0	1	1	0	1	8	0	1
1	1	4	0	>70	4	1	0	0	0	0	0	0	0	0	0	0	0	0	1	1	0	0	0	1	0	72	2	1	100	0	1	38	0	1	89.3333	0	1	0.78	0	1	224	0	1	1	0	1	14	0	1
1	1	11	0	>80	4	1	0	0	0	0	0	0	0	0	0	0	0	0	0	0	0	0	0	0	0	87	3	1	96	0	1	38.8333	1	1	83	0	1	2.13	0	1	160	0	1	1.2	0	1	18	0	1
1	1	5	1	>80	7	0	0	0	1	0	0	0	0	1	0	0	0	0	0	0	0	0	0	0	0	91	3	1	91	1	1	36.5556	0	1	82.6667	0	1	1.12	0	1	190	0	1	1.4	0	1	45	1	1
1	1	9	0	>70	4	0	0	0	1	0	0	0	0	1	0	0	0	0	0	0	0	0	0	0	0	80	2	1	89	1	1	36.8889	0	1	83.6667	0	1	0.74	0	1	210	0	1	1	0	1	22	0	1
1	1	10	0	>80	6	0	1	0	0	0	0	0	1	0	0	0	0	0	0	0	0	0	0	0	0	84	3	1	86	1	1	36.3333	0	1	88.6667	0	1	3.37	1	1	288	0	1	1.2	1	1	96	1	1
1	1	3	0	0-60	0	0	1	0	0	0	0	0	0	0	0	0	0	0	0	0	0	0	0	0	0	54	0	1	98	0	1	36.6667	0	1	104.667	0	1	0.39	0	1	185	0	1	1	0	1	11	0	1
1	0	0	0	>80	7	1	0	0	0	0	2	1	0	1	0	0	0	0	0	0	0	0	0	0	0	81	3	1	99	0	1	37.7222	0	1	90.3333	0	1	3.85	1	1	184	0	1	1.1	1	1	55	1	1
1	1	1	0	0-60	1	1	0	0	0	0	0	0	0	0	0	0	0	0	0	0	0	0	0	0	0	58	0	1	96	0	1	36.7222	0	1	90	0	1	0.58	0	1	535	0	1	1.1	0	1	10	0	1
1	1	5	1	>70	6	1	0	0	0	0	0	0	0	0	0	1	1	1	1	1	0	0	0	0	0	77	2	1	78	1	1	37.0556	0	1	52.3333	1	1	0.26999	0	1	180	0	1	1	0	1	37	1	1
1	1	14	1	0-60	1	0	1	0	0	0	0	0	0	1	0	0	0	0	0	0	0	0	0	0	0	59	0	1	100	0	1	39.6111	1	1	108.333	0	1	2.82	0	1	115	1	1	1.1	0	1	10	0	1
1	1	5	1	>80	7	1	0	0	0	0	0	0	0	0	0	0	0	0	0	0	0	0	0	0	0	88	3	1	93	1	1	37.2222	0	1	63	0	1	20	1	1	219	0	1	1.5	1	1	17	0	1
1	1	5	1	>70	8	0	0	0	0	0	0	0	0	0	0	1	1	1	0	0	0	0	0	0	0	80	2	1	90	1	1	37.1667	0	1	63.6667	0	1	2.28	0	1	324	0	1	1.3	0	1	100	1	1
1	1	4	0	>70	2	0	0	0	1	0	0	0	0	0	0	0	0	0	0	0	0	0	0	0	0	80	2	1	98	0	1	36.8889	0	1	90	0	1	1.45	0	1	259	0	1	1	0	1	22	0	1
1	1	4	1	>60	4	0	1	0	0	0	0	0	0	0	0	0	0	0	1	1	0	0	0	0	0	66	1	1	92	1	1	37.1667	0	1	105.333	0	1	1.12	0	1	693	0	1	17.0001	0	1	19	0	1
1	1	8	0	>70	5	0	0	0	1	0	0	0	0	0	0	1	1	1	1	1	0	0	0	0	0	72	2	1	98	0	1	37.5556	0	1	87	0	1	3.77	1	1	267	0	1	1.2	1	1	57	1	1
1	1	6	0	0-60	2	0	1	0	1	0	0	0	0	0	0	0	0	0	0	0	0	0	0	0	0	57	0	1	94	0	1	37.0556	0	1	99.3333	0	1	2.78	0	1	547	0	1	1.1	0	1	53	1	1
1	1	12	1	>60	5	1	0	0	0	0	0	0	0	0	0	0	0	0	0	0	0	0	0	0	0	66	1	1	96	0	1	38.0556	1	1	27.3333	1	1	3.23	1	1	112	1	1	1	1	1	21	0	1
1	1	1	0	0-60	1	0	0	0	1	0	0	0	0	0	0	0	0	0	0	0	0	0	0	0	0	59	0	1	93	1	1	37.0556	0	1	87.3333	0	1	0.94	0	1	331	0	1	1.1	0	1	26	0	1
1	0	0	0	>80	4	0	1	0	0	0	1	1	0	0	0	0	0	0	0	0	0	0	0	0	0	85	3	1	98	0	1	36.2222	0	1	109	0	1	0.57	0	1	134	1	1	1.1	0	1	20	0	1
1	1	1	1	>70	6	1	0	0	0	0	0	0	0	0	0	0	0	0	0	0	0	0	0	0	0	79	2	1	95	0	1	36.5	0	1	83.6667	0	1	3.59	1	1	336	0	1	1.4	1	1	200	1	1
1	1	14	0	>60	7	1	0	0	0	0	0	0	0	0	0	0	0	0	0	0	0	0	0	0	0	66	1	1	55	1	1	38.4444	1	1	98	0	1	8.43	1	1	323	0	1	1.2	1	1	46	1	1
1	0	0	0	0-60	0	0	0	0	1	0	0	0	0	1	0	0	0	0	1	1	0	0	0	1	0	30	0	1	99	0	1	36.5556	0	1	91	0	0	0	0	1	415	0	1	1.2	0	1	4.999	0	1
1	1	1	1	>70	7	0	1	0	0	0	0	0	0	0	0	1	1	1	0	0	0	0	0	0	0	76	2	1	98	0	1	36.3889	0	1	37.3333	1	1	3.07	1	1	165	0	1	1.2	1	1	49	1	1
1	1	1	0	>60	4	0	0	0	0	0	0	0	0	1	0	0	0	0	0	0	0	0	0	0	0	67	1	1	98	0	1	38.2222	1	1	89.3333	0	1	4.22	1	1	216	0	1	1.1	1	1	25	0	1
1	1	8	0	>60	7	0	1	0	0	0	0	0	0	0	0	0	0	0	0	0	0	0	0	0	0	70	1	1	88	1	1	37.0556	0	1	73.6667	0	1	20	1	1	147	1	1	1.3	1	1	46	1	1
1	1	6	0	>60	2	0	0	0	0	0	0	0	0	1	0	0	0	0	0	0	0	0	0	0	0	62	1	1	98	0	1	36.7222	0	1	84.3333	0	1	0.27	0	1	314	0	1	1.7	0	1	12	0	1
1	1	2	0	0-60	0	0	0	0	1	0	0	0	0	0	0	0	0	0	0	0	0	0	0	0	0	30	0	1	100	0	1	37	0	1	86.3333	0	1	2.57	0	1	184	0	1	1.1	0	1	6	0	1
1	1	6	0	0-60	2	1	0	0	0	0	0	0	0	0	0	0	0	0	0	0	0	0	0	0	0	28	0	0	0	1	1	36.7778	0	0	0	0	1	2.03	0	1	206	0	1	1.1	0	1	9	0	1
1	1	7	0	>60	1	1	0	0	0	0	0	0	0	0	0	0	0	0	1	1	0	0	0	1	0	62	1	1	98	0	1	37	0	1	98.6667	0	1	1.87	0	1	218	0	1	1	0	0	0	0	1
1	1	13	1	>60	2	1	0	0	0	0	0	0	0	1	0	1	1	1	0	0	0	0	0	0	0	66	1	1	100	0	1	37.4444	0	1	81.3333	0	0	0	0	1	246	0	1	1	0	1	14	0	1
1	1	17	0	>70	3	1	0	0	0	0	0	0	0	0	0	0	0	0	0	0	0	0	0	0	0	75	2	1	95	0	1	36.7222	0	1	80.6667	0	1	1.29	0	1	110	1	1	0.9	0	1	12	0	1
1	1	10	0	0-60	2	0	0	0	1	0	1	1	0	0	0	0	1	1	0	0	0	0	0	0	0	58	0	1	99	0	1	36.3889	0	1	99.3333	0	1	3.46	1	1	408	0	1	1.1	1	1	13	0	1
1	1	3	0	0-60	0	1	0	0	0	0	0	0	0	0	0	0	0	0	0	0	0	0	0	0	0	57	0	1	97	0	1	37.0556	0	1	103.667	0	1	1.54	0	1	555	0	1	1.2	0	1	20	0	1
1	1	6	0	>60	3	1	0	0	0	0	0	0	0	0	0	0	0	0	0	0	0	0	0	0	0	65	1	1	94	0	1	37.7222	0	1	76.6667	0	0	0	0	1	143	1	1	1.1	0	1	16	0	1
1	1	9	0	>70	8	0	0	0	1	0	0	0	0	0	0	0	0	0	0	0	0	0	0	0	0	77	2	1	96	0	1	36.5556	0	1	101.667	0	1	20	1	1	74	2	1	2	1	1	68	1	1
1	1	16	1	>70	8	1	0	0	0	0	0	0	1	0	0	1	1	1	0	0	0	0	0	0	0	77	2	1	75	1	1	36.8889	0	1	62.6667	0	1	7	1	1	291	0	1	1.3	1	1	50	1	1
1	1	10	0	>70	4	0	0	0	1	0	0	0	0	0	0	0	0	0	0	0	0	0	0	0	0	76	2	1	96	0	1	36.7222	0	1	83.6667	0	1	1.37	0	1	277	0	1	1	0	1	93	1	1
1	1	4	1	>60	7	0	0	0	0	0	0	0	1	0	0	0	0	0	0	0	0	0	0	0	0	66	1	1	92	1	1	40.3333	1	1	59	1	0	0	0	1	253	0	1	1.3	0	1	22	0	1
1	1	11	0	>70	3	0	0	0	1	0	0	0	0	0	0	0	0	0	0	0	0	0	0	0	0	72	2	1	96	0	1	37.0556	0	1	84	0	1	6.54	1	1	219	0	1	1	1	1	7	0	1
1	1	14	0	>60	3	0	1	0	0	0	0	0	0	1	0	0	0	0	0	0	0	0	0	0	0	67	1	1	95	0	1	39.3889	1	1	88.3333	0	1	3.65	1	1	170	0	1	1	1	1	14	0	1
1	1	7	1	>60	4	1	0	0	0	1	0	1	0	0	1	0	1	0	0	0	0	0	0	0	0	67	1	1	60	1	1	37.5556	0	1	77.3333	0	1	1.91	0	1	209	0	1	1.1	0	1	40	1	1
1	1	5	0	>60	2	0	0	0	0	0	0	0	0	0	0	0	0	0	1	1	0	0	0	1	0	68	1	1	100	0	1	36.7778	0	1	83	0	1	0.46	0	1	188	0	1	1.1	0	1	16	0	1
1	1	3	1	>80	6	0	0	0	1	0	0	0	1	0	0	0	0	1	0	0	0	0	0	0	0	90	3	1	61	1	1	37.1667	0	1	54.6667	0	1	2.5	0	1	134	1	1	1.1	0	1	19	0	1
1	1	4	0	>70	3	1	0	0	0	0	0	0	1	0	0	0	0	0	1	1	0	0	0	0	0	73	2	1	97	0	1	38.4444	1	1	89.3333	0	1	2.73	0	1	156	0	1	1	0	1	31	1	1
1	1	7	0	>60	4	0	0	0	1	0	0	0	0	1	0	0	0	0	0	0	0	0	0	0	0	63	1	1	82	1	1	37.0556	0	1	83	0	1	2.24	0	1	339	0	1	1.1	0	1	19	0	1
1	1	4	0	>70	5	0	0	0	1	0	0	0	0	0	0	0	0	0	0	0	0	0	0	0	0	72	2	1	90	1	1	37.3333	0	1	80.3333	0	1	0.93	0	1	197	0	1	1.1	0	1	22	0	1
1	1	5	1	>70	2	0	0	0	0	0	0	0	0	0	0	0	0	0	0	0	0	0	0	0	0	78	2	1	95	0	1	36.8889	0	1	77	0	0	0	0	1	322	0	0	0	0	1	11	0	1
1	1	13	0	>70	6	1	0	0	0	0	0	0	0	0	0	0	0	0	0	0	0	0	0	0	0	72	2	1	96	0	1	36.6667	0	1	86.6667	0	1	1.36	0	1	255	0	1	1.2	0	1	150	1	1
1	1	14	1	>80	8	0	0	0	0	0	0	0	0	0	0	0	0	0	0	0	0	0	0	0	0	82	3	1	84	1	1	37	0	1	53	0	1	1.63	0	1	312	0	1	1.3	0	1	28	0	1
1	1	3	0	>80	4	0	0	0	0	0	0	0	0	0	0	0	0	0	1	1	0	0	0	1	0	86	3	1	100	0	1	36.6667	0	1	102.333	0	0	0	0	1	377	0	1	1	0	1	44	1	1
1	1	7	0	0-60	3	0	0	0	0	0	0	0	0	0	0	0	0	0	0	0	0	0	0	0	0	60	0	1	89	1	1	37.3333	0	1	98	0	1	1.03	0	1	200	0	1	1	0	1	9	0	1
1	1	11	1	>60	5	0	0	0	0	0	0	0	0	1	0	0	0	0	0	0	0	0	0	0	0	66	1	1	99	0	1	37.6111	0	1	80.6667	0	1	5.98	1	1	172	0	1	1	1	0	0	0	1
1	1	10	0	>70	8	0	0	0	1	0	0	0	1	0	0	0	0	0	0	0	0	0	0	0	0	73	2	1	84	1	1	37	0	1	77.3333	0	1	4.17	1	1	168	0	1	1	1	1	83	1	1
1	1	2	1	>60	6	1	0	0	0	0	0	0	0	0	0	0	0	0	0	0	0	0	0	0	0	65	1	1	98	0	1	37.1111	0	1	58	1	1	4.44	1	1	632	0	1	2	1	1	39	1	1
1	1	2	0	0-60	1	1	0	0	0	0	0	1	0	0	0	0	0	0	0	0	0	0	0	0	0	38	0	1	95	0	1	36.9444	0	1	102.333	0	0	0	0	1	227	0	1	1	0	1	18	0	1
1	1	7	1	>60	3	1	0	0	0	0	0	0	0	0	0	0	0	0	1	0	1	0	0	0	0	66	1	1	95	0	1	36.8333	0	1	79.3333	0	1	9.27	1	1	247	0	1	1	1	1	14	0	1
1	1	6	1	>70	6	1	0	0	0	0	0	0	0	0	0	1	1	0	0	0	0	0	0	0	0	72	2	1	89	1	1	37.1111	0	1	75.6667	0	0	0	0	1	244	0	1	1.1	0	1	18	0	1
1	1	1	1	>80	5	0	0	0	1	0	0	0	0	0	0	0	0	0	0	0	0	0	0	0	0	82	3	1	100	0	1	39.6667	1	1	90	0	1	0.26999	0	1	339	0	1	1.2	0	1	31	1	1
1	1	5	0	0-60	1	1	0	0	0	0	0	0	0	0	0	0	0	0	0	0	0	0	0	0	0	57	0	1	94	0	1	37.0556	0	1	84.6667	0	0	0	0	1	599	0	0	0	0	1	27	0	1
1	1	3	1	>80	6	0	0	0	1	0	2	1	1	1	0	0	1	1	0	0	0	0	0	0	0	89	3	1	81	1	1	39.7778	1	1	60	0	1	1.81	0	1	181	0	1	1	0	1	31	1	1
1	1	6	1	>60	3	0	0	0	1	0	0	0	1	0	0	0	0	0	0	0	0	0	0	0	0	64	1	1	87	1	1	38.8889	1	1	86	0	1	0.59	0	1	174	0	1	1	0	1	24	0	1
1	1	20	1	>80	6	0	1	0	0	0	0	0	1	0	0	0	0	0	0	0	0	0	0	0	0	88	3	1	100	0	1	36.6111	0	1	48.3333	1	0	0	0	1	227	0	1	1.1	0	1	64	1	1
1	1	18	0	0-60	6	1	0	0	0	0	0	0	0	0	0	0	0	0	1	0	1	0	0	0	0	55	0	1	90	1	1	37.2778	0	1	76	0	1	3.99	1	1	391	0	1	1.1	1	0	0	0	1
1	1	2	0	>60	1	1	0	0	0	0	1	0	0	0	0	0	0	0	0	0	0	0	0	0	0	63	1	1	98	0	1	37.5	0	1	92.6667	0	1	1.44	0	1	196	0	1	1.1	0	1	8	0	1
1	1	3	0	>80	6	0	0	0	1	0	0	0	0	0	0	0	0	0	0	0	0	0	0	0	0	95	3	1	96	0	1	36.8889	0	1	72.6667	0	1	3.99	1	1	152	0	1	1.3	1	1	8	0	1
1	1	12	1	0-60	4	1	0	0	0	0	1	0	1	1	0	0	0	1	0	0	0	0	0	0	0	56	0	1	94	0	1	39.3889	1	1	32.6667	1	1	0.97	0	1	105	1	1	1.1	0	1	42	1	1
1	1	8	1	>70	7	0	0	0	1	1	0	1	0	0	0	1	1	1	0	0	0	0	0	0	0	73	2	1	96	0	1	38.5556	1	0	0	0	1	2.84	0	1	92	2	1	1.1	0	0	0	0	1
1	1	26	0	>60	3	0	1	0	0	0	1	0	0	0	0	0	0	0	0	0	0	0	0	0	0	70	1	0	0	1	0	0	0	0	0	0	0	0	0	1	211	0	0	0	0	1	78	1	1
1	1	9	0	>60	8	1	0	0	0	0	0	0	0	0	0	0	0	0	0	0	0	0	0	0	0	66	1	1	89	1	1	36.7222	0	1	84.6667	0	1	8.94	1	1	216	0	1	1.4	1	1	136	1	1
1	1	22	0	0-60	4	0	0	0	1	0	0	0	0	0	0	0	0	0	0	0	0	0	0	0	0	52	0	1	95	0	1	37.1667	0	1	85.6667	0	1	2.86	0	1	252	0	1	1.3	0	0	0	0	1
1	1	2	0	>70	4	1	0	0	0	0	0	0	0	0	0	0	0	0	0	0	0	0	0	0	0	76	2	1	96	0	1	37	0	1	92.6667	0	1	0.43	0	1	39	2	1	1	0	1	12	0	1
1	1	4	0	>80	5	1	0	0	0	0	0	0	0	0	0	0	0	1	0	0	0	0	0	0	0	83	3	1	97	0	1	37.8333	0	1	82	0	0	0	0	1	261	0	1	1	0	1	19	0	1
1	0	0	0	>60	3	1	0	0	0	0	0	0	0	1	0	0	0	0	1	1	0	0	0	0	0	63	1	1	100	0	1	36.3889	0	1	89	0	1	6.2	1	1	364	0	1	1.1	1	1	19	0	1
1	1	13	0	0-60	2	0	0	0	1	0	0	0	0	0	0	0	0	0	0	0	0	0	0	0	0	49	0	1	87	1	1	37.4444	0	1	89.6667	0	1	0.31	0	1	275	0	1	1	0	1	9	0	1
1	1	3	0	0-60	3	0	0	0	1	0	0	0	1	0	0	1	1	0	0	0	0	0	0	0	0	50	0	1	92	1	1	36.1667	0	1	93.3333	0	1	0.72	0	1	193	0	1	1	0	1	11	0	1
1	1	2	0	>70	3	1	0	0	0	0	0	0	0	0	0	0	0	0	0	0	0	0	0	0	0	72	2	1	96	0	1	37	0	1	85.3333	0	1	2.33	0	1	374	0	1	1	0	1	6	0	1
1	1	9	0	0-60	0	0	0	0	1	0	0	0	1	0	0	0	0	0	0	0	0	0	0	0	0	44	0	1	96	0	1	37.7222	0	1	90	0	1	2.47	0	1	208	0	1	1.1	0	1	9	0	1
1	1	14	0	0-60	2	0	0	0	1	1	0	1	0	0	0	0	1	1	0	0	0	0	0	0	0	57	0	1	100	0	1	36.4444	0	1	112.333	0	1	2.58	0	1	170	0	1	1	0	1	137	1	1
1	1	5	0	>80	5	0	0	0	1	0	0	0	0	0	0	0	0	0	0	0	0	0	0	0	0	91	3	1	97	0	1	36.2778	0	1	78.3333	0	1	3.3	1	1	227	0	1	1.1	1	1	26	0	1
1	1	4	0	0-60	0	1	0	0	0	0	0	1	0	0	0	1	1	1	0	0	0	0	0	0	0	49	0	1	100	0	1	39.1667	1	1	88.6667	0	1	1.88	0	1	197	0	1	0.9	0	1	14	0	1
1	1	1	1	>70	6	0	1	0	0	0	0	0	0	0	0	0	0	0	0	0	0	0	0	0	0	80	2	1	80	1	1	37.0556	0	1	94.3333	0	0	0	0	1	796	0	1	1.5	0	1	12	0	1
1	1	3	0	>80	3	1	0	0	0	0	0	0	0	0	0	0	0	0	0	0	0	0	0	0	0	97	3	1	96	0	1	35.9444	0	1	84	0	1	1.48	0	1	249	0	1	1.1	0	1	36	1	1
1	1	4	0	>80	4	1	0	0	0	0	0	0	0	0	0	0	0	0	0	0	0	0	0	0	0	88	3	1	100	0	1	36.7222	0	1	92.6667	0	1	1.96	0	1	493	0	1	2.2	0	1	31	1	1
1	1	2	0	>70	2	1	0	0	0	0	1	0	0	0	0	0	1	1	0	0	0	0	0	0	0	75	2	1	97	0	1	37.1667	0	1	102.333	0	1	1.56	0	1	250	0	1	1.2	0	1	9	0	1
1	1	33	0	>70	3	1	0	0	0	0	0	0	0	1	0	0	0	0	1	1	0	0	0	0	0	74	2	1	89	1	1	36.9444	0	1	106	0	1	1.41	0	1	324	0	1	1	0	0	0	0	1
1	1	1	0	0-60	0	0	1	0	0	0	2	0	1	0	0	0	0	0	0	0	0	0	0	0	0	59	0	1	95	0	1	36.6667	0	1	95.6667	0	1	0.28	0	1	358	0	1	1.1	0	1	17	0	1
1	1	6	0	>70	3	1	0	0	0	0	0	1	0	0	1	0	0	0	0	0	0	0	0	0	0	71	2	1	100	0	1	37.3333	0	1	80.3333	0	1	0.27	0	1	161	0	1	1	0	1	12	0	1
1	1	20	1	>60	5	0	0	0	0	0	0	0	0	0	0	0	0	0	0	0	0	0	0	0	0	65	1	1	67	1	1	37.2222	0	1	37.6667	1	1	2.83	0	1	200	0	1	1.1	0	1	17	0	1
1	1	9	0	0-60	1	0	0	0	1	0	0	0	0	0	0	0	0	0	0	0	0	0	0	0	0	60	0	0	0	1	0	0	0	0	0	0	1	0.97	0	0	0	0	1	1.1	0	0	0	0	0
1	1	4	1	>60	9	1	0	0	0	0	0	0	0	0	0	0	0	0	0	0	0	0	0	0	0	68	1	1	92	1	1	35.9444	0	1	87	0	1	20	1	1	54	2	1	1.3	1	1	86	1	1
1	1	8	0	>60	4	1	0	0	0	0	0	0	0	0	0	0	0	0	0	0	0	0	0	0	0	61	1	1	92	1	1	37.3333	0	1	94.6667	0	0	0	0	1	213	0	0	0	0	1	13	0	1
1	1	8	1	>80	9	1	0	0	0	0	0	0	0	0	0	0	0	0	0	0	0	0	0	0	0	87	3	1	93	1	1	36.5556	0	0	0	0	1	15.39	1	1	313	0	1	1.2	1	1	107	1	1
1	1	3	0	>60	3	0	0	0	0	0	0	0	0	0	0	1	1	0	1	0	1	0	0	0	0	64	1	1	99	0	1	36.2222	0	1	98.3333	0	1	0.39	0	1	174	0	1	1.3	0	1	9	0	1
1	1	12	1	>80	10	0	0	0	1	0	0	0	0	0	0	0	0	0	0	0	0	0	0	0	0	90	3	1	88	1	1	36.3889	0	1	49.3333	1	1	10.71	1	1	426	0	1	1.1	1	1	119	1	1
1	1	3	0	0-60	0	0	0	0	1	0	0	1	0	0	0	0	0	0	0	0	0	0	0	0	0	40	0	1	94	0	1	37.8889	0	1	108.333	0	0	0	0	1	288	0	1	1	0	1	12	0	1
1	1	12	0	0-60	5	1	0	0	0	0	0	0	0	0	0	0	0	0	0	0	0	0	0	0	0	55	0	1	96	0	1	38.1667	1	1	75	0	1	4.69	1	1	278	0	1	1.5	1	0	0	0	1
1	1	5	0	>70	2	0	1	0	0	1	0	1	0	0	0	0	1	1	0	0	0	0	0	0	0	72	2	1	97	0	1	36.3889	0	1	82.6667	0	0	0	0	1	240	0	1	0.9	0	1	11	0	1
1	1	5	0	>70	4	0	0	0	1	0	0	0	0	0	0	0	0	0	0	0	0	0	0	0	0	73	2	1	91	1	1	36.7778	0	1	91.6667	0	1	3.78	1	1	163	0	1	1.2	1	1	21	0	1
1	1	1	1	>80	8	1	0	0	0	0	1	0	0	0	0	0	0	1	1	1	0	0	0	0	0	92	3	1	89	1	1	37.6667	0	1	85	0	0	0	0	1	158	0	1	1.4	0	1	61	1	1
1	1	4	0	>70	8	1	0	0	0	1	1	1	1	0	0	0	1	0	0	0	0	0	0	0	0	74	2	1	80	1	1	36.8333	0	1	95.6667	0	1	1.18	0	1	167	0	1	1.3	0	0	0	0	1
1	1	4	0	0-60	0	0	1	0	0	0	0	0	0	0	0	0	0	0	0	0	0	0	0	0	0	60	0	1	99	0	1	37.3889	0	1	98.3333	0	0	0	0	1	162	0	1	0.9	0	1	20	0	1
1	1	4	0	0-60	2	1	0	0	0	0	0	0	0	0	0	1	1	1	0	0	0	0	0	0	0	34	0	0	0	1	0	0	0	0	0	0	1	1.45	0	1	143	1	1	1	0	1	14	0	1
1	1	1	1	>70	7	1	0	0	0	0	0	1	1	0	0	0	0	1	0	0	0	0	0	0	0	76	2	1	45	1	1	36.1111	0	1	108.333	0	1	20	1	1	414	0	1	1.3	1	1	42	1	1
1	1	1	0	>80	4	0	0	0	1	0	1	0	0	0	0	0	0	1	1	1	0	0	0	1	0	87	3	1	95	0	1	37.9444	0	1	99	0	0	0	0	1	295	0	0	0	0	1	9	0	1
1	1	11	1	>60	5	0	1	0	0	0	0	0	0	0	0	0	0	0	0	0	0	0	0	0	0	70	1	1	100	0	1	38.7222	1	1	71.3333	0	1	1.96	0	1	123	1	1	1.3	0	1	40	1	1
1	1	10	0	>60	2	0	1	0	0	0	1	0	0	0	0	0	0	0	1	1	0	0	1	0	0	65	1	1	96	0	1	37.1111	0	1	106.667	0	1	1.48	0	1	204	0	1	1.3	0	1	40	1	1
1	1	6	0	>80	5	0	0	0	1	1	1	1	1	1	1	0	1	1	1	1	0	0	0	0	0	86	3	1	91	1	1	37.3333	0	1	85	0	1	0.73	0	1	139	1	1	1	0	1	19	0	1
1	1	6	0	>60	5	1	0	0	0	0	0	0	0	0	0	0	0	0	0	0	0	0	0	0	0	63	1	1	95	0	1	37.8333	0	1	102.333	0	1	10.84	1	1	58	2	1	1.2	1	1	17	0	1
1	0	0	0	>60	6	1	0	0	1	0	0	0	0	0	0	0	0	0	0	0	0	0	0	0	0	64	1	1	88	1	1	38.2778	1	1	66	0	1	1.65	0	1	102	1	1	0.9	0	1	56	1	1
1	1	4	0	>70	3	0	0	0	1	0	0	0	0	0	0	0	0	0	0	0	0	0	0	0	0	72	2	1	98	0	1	39.1111	1	1	93.3333	0	1	0.52	0	1	212	0	1	1.1	0	1	25	0	1
1	1	4	0	0-60	1	0	0	0	0	0	0	0	0	0	0	0	0	0	0	0	0	0	0	0	0	57	0	1	96	0	1	37.8333	0	1	102	0	1	0.52	0	1	268	0	1	1	0	1	9	0	1
1	1	7	0	>60	6	1	0	0	1	0	0	0	0	0	0	0	0	0	0	0	0	0	0	0	0	69	1	1	92	1	1	39.1111	1	1	108	0	1	1.49	0	1	151	0	1	1.1	0	1	39	1	1
1	1	4	0	>70	3	1	0	0	0	0	0	0	0	0	0	0	0	0	0	0	0	0	0	0	0	79	2	1	88	1	1	38.4444	1	1	79	0	0	0	0	1	220	0	1	1.1	0	1	6	0	1
1	1	10	0	>60	1	1	0	0	0	0	0	1	1	0	0	0	0	0	1	0	0	1	0	0	1	64	1	1	97	0	1	37.3889	0	1	91.6667	0	1	1.31	0	1	152	0	1	1	0	1	22	0	1
1	1	12	0	>60	1	0	0	0	1	0	0	0	1	0	0	0	0	0	0	0	0	0	0	0	0	70	1	1	97	0	1	36.9444	0	1	73.6667	0	1	0.46	0	1	263	0	1	1	0	1	10	0	1
1	1	2	0	>70	5	0	0	0	0	0	1	0	0	0	0	1	1	0	0	0	0	0	0	0	0	77	2	1	94	0	1	36.8333	0	1	87	0	1	20	1	1	188	0	1	1.3	1	1	74	1	1
1	1	13	1	0-60	5	0	0	0	1	0	0	0	0	0	0	0	0	0	0	0	0	0	0	0	0	47	0	1	35	1	1	37.6111	0	1	93.6667	0	1	9.07	1	1	244	0	1	1.1	1	0	0	0	1
1	1	7	0	>70	5	0	1	0	0	0	0	0	1	0	1	0	0	0	0	0	0	0	0	0	0	72	2	1	86	1	1	37.1667	0	1	81.3333	0	1	2.53	0	1	224	0	1	1.3	0	1	19	0	1
1	1	10	0	0-60	5	0	0	0	1	0	0	0	0	0	1	0	0	0	0	0	0	0	0	0	0	57	0	1	92	1	1	37.1667	0	1	98	0	1	3.23	1	1	176	0	1	1.3	1	1	26	0	1
1	1	4	0	0-60	2	0	0	0	0	0	0	0	0	0	0	0	0	0	0	0	0	0	0	0	0	56	0	1	84	1	1	36.7778	0	1	69.3333	0	1	0.95	0	1	358	0	1	1.1	0	1	16	0	1
1	1	5	0	0-60	1	0	0	0	1	0	0	0	0	0	0	0	0	0	0	0	0	0	0	0	0	42	0	1	91	1	1	38.8889	1	1	103.333	0	1	0.66	0	1	157	0	1	1.1	0	1	21	0	1
1	1	11	0	>80	4	0	0	0	1	0	0	0	0	0	0	0	0	0	0	0	0	0	0	0	0	85	3	1	99	0	1	38.1111	1	1	94.6667	0	0	0	0	1	128	1	1	1.1	0	1	24	0	1
1	1	11	0	0-60	0	1	0	0	0	0	1	0	0	0	0	0	0	0	0	0	0	0	0	0	0	32	0	1	100	0	1	38.4444	1	1	78.6667	0	0	0	0	1	190	0	1	1.2	0	1	7	0	1
1	1	6	0	>60	3	1	0	0	0	1	1	0	1	0	0	1	1	1	0	0	0	0	0	0	0	65	1	1	80	1	1	36.8889	0	1	94.6667	0	1	1.2	0	1	301	0	1	1.1	0	0	0	0	1
1	1	3	1	>70	4	1	0	0	0	0	0	0	0	0	0	0	0	1	0	0	0	0	0	0	0	77	2	1	97	0	1	38.4444	1	1	85.6667	0	1	1.44	0	1	252	0	1	1	0	1	28	0	1
1	1	3	1	>70	9	0	0	0	1	0	1	0	0	0	0	0	0	0	0	0	0	0	0	0	0	77	2	1	77	1	1	36.1111	0	1	41.6667	1	0	0	0	1	113	1	1	2	0	1	98	1	1
1	1	2	0	>70	4	0	0	0	1	0	0	1	0	0	0	1	1	0	0	0	0	0	0	0	0	80	2	1	98	0	1	36.9444	0	1	86.6667	0	1	3.21	1	1	141	1	0	0	1	1	15	0	1
1	1	15	1	0-60	3	0	0	0	1	0	0	0	0	0	0	0	0	0	0	0	0	0	0	0	0	30	0	1	98	0	1	36.3333	0	1	107.333	0	1	11.11	1	1	190	0	1	1.2	1	1	69	1	1
1	1	3	0	0-60	1	1	0	0	0	0	0	0	0	0	0	0	0	0	0	0	0	0	0	0	0	44	0	1	93	1	1	37.3889	0	1	103.333	0	1	0.41	0	1	264	0	1	1.1	0	1	8	0	1
1	0	0	0	>60	4	1	0	0	0	0	1	0	0	0	0	0	0	0	0	0	0	0	0	0	0	63	1	1	86	1	1	37.8889	0	1	92.6667	0	1	1.9	0	1	401	0	1	1.4	0	1	12	0	1
1	1	3	0	0-60	1	1	0	0	0	0	1	0	0	0	0	0	0	0	0	0	0	0	0	0	0	43	0	1	95	0	1	37.3889	0	1	111.667	0	1	0.78	0	1	300	0	1	0.9	0	0	0	0	1
1	1	16	0	>70	7	1	0	0	0	0	0	0	1	0	0	1	1	1	0	0	0	0	0	0	0	80	2	1	82	1	1	36.7222	0	1	97	0	1	9.91	1	1	168	0	1	1.5	1	1	15	0	1
1	1	13	1	>60	7	0	0	0	1	0	0	0	0	0	0	0	0	0	0	0	0	0	0	0	0	64	1	1	93	1	1	36.5556	0	1	30	1	1	0.97	0	1	73	2	1	1	0	1	40	1	1
1	1	2	0	0-60	0	1	0	0	0	0	0	0	0	0	0	1	1	0	0	0	0	0	0	0	0	53	0	1	94	0	1	36.6111	0	1	89.6667	0	1	0.7	0	1	365	0	1	1	0	1	17	0	1
1	1	3	0	>80	4	0	1	0	0	1	1	1	1	0	1	0	1	1	1	1	0	0	1	0	0	85	3	0	0	1	0	0	0	0	0	0	0	0	0	1	184	0	0	0	0	1	14	0	1
1	1	1	0	>60	1	0	0	0	1	0	0	0	0	0	0	0	0	1	0	0	0	0	0	0	0	65	1	1	94	0	1	37.2222	0	1	95.6667	0	1	1.62	0	1	264	0	1	1	0	1	16	0	1
1	1	4	0	>70	3	1	0	0	0	0	1	0	0	0	0	0	0	0	0	0	0	0	0	0	0	71	2	1	100	0	1	37.4444	0	1	88	0	1	3.85	1	1	161	0	1	1.1	1	1	14	0	1
1	1	3	1	>60	6	1	0	0	0	0	0	0	0	0	0	0	0	0	0	0	0	0	0	0	0	65	1	1	76	1	1	36.2222	0	1	91	0	1	20	1	1	389	0	1	1.6	1	1	84	1	1
1	1	3	0	>70	2	0	0	0	1	0	0	0	0	0	0	0	0	0	0	0	0	0	0	0	0	71	2	1	98	0	1	38.1111	1	1	82.3333	0	1	0.32	0	1	193	0	1	1.2	0	1	10	0	1
1	1	5	0	0-60	0	0	0	0	1	0	1	0	0	0	0	0	0	0	0	0	0	0	0	0	0	42	0	1	97	0	1	38.2222	1	1	87.6667	0	0	0	0	1	229	0	1	1	0	1	15	0	1
1	1	12	0	>70	5	1	0	0	0	0	0	0	0	0	1	0	0	0	1	1	0	0	0	1	0	80	2	1	96	0	1	37.8889	0	1	77	0	1	5.38	1	1	291	0	1	1.1	1	1	35	1	1
1	1	4	0	>70	2	0	0	0	1	0	0	0	0	0	0	0	0	0	1	1	0	0	0	1	0	75	2	1	97	0	1	36.5556	0	1	89.6667	0	0	0	0	1	151	0	0	0	0	1	35	1	1
1	1	9	0	>70	3	1	0	0	1	0	0	0	0	0	0	0	0	0	0	0	0	0	0	0	0	77	2	1	97	0	1	35.4444	0	1	91.3333	0	1	9.34	1	1	513	0	1	1.2	1	1	9	0	1
1	1	22	1	>60	4	0	0	0	1	0	0	0	0	0	0	0	0	0	0	0	0	0	0	0	0	70	1	1	89	1	1	37.2778	0	1	92.6667	0	1	8.72	1	1	141	1	1	1	1	0	0	0	1
1	1	16	0	>70	6	0	0	0	1	1	1	1	1	0	0	0	1	1	0	0	0	0	0	0	0	71	2	1	99	0	1	37.2778	0	1	69.3333	0	1	1.58	0	1	299	0	1	17.0001	0	1	89	1	1
1	1	6	0	>60	4	1	0	0	0	0	0	0	0	0	0	0	0	0	0	0	0	0	0	0	0	62	1	1	88	1	1	38.6667	1	1	103	0	1	1.87	0	1	262	0	1	1.1	0	1	10	0	1
1	1	8	0	>60	2	0	0	0	1	0	0	0	0	0	0	0	0	0	0	0	0	0	0	0	0	69	1	1	95	0	1	37.1667	0	1	102.667	0	1	0.95	0	1	220	0	1	0.9	0	1	13	0	1
1	1	3	0	>70	5	0	0	0	1	0	0	0	0	0	0	0	0	0	0	0	0	0	0	0	0	71	2	1	92	1	1	38.3889	1	1	86.3333	0	1	2.26	0	1	190	0	1	1	0	1	49	1	1
1	1	7	0	>70	6	0	0	0	1	0	1	0	0	0	0	0	0	1	0	0	0	0	0	0	0	79	2	1	93	1	1	37.0556	0	1	102.667	0	1	0.89	0	1	178	0	1	1.4	0	1	80	1	1
1	1	5	0	>70	5	1	0	0	0	0	1	0	0	0	0	0	0	0	0	0	0	0	0	0	0	77	2	1	97	0	1	37.6667	0	1	89.6667	0	1	4.28	1	1	61	2	1	1.1	1	1	22	0	1
1	1	3	0	0-60	3	0	0	0	0	0	1	0	0	0	0	1	1	0	0	0	0	0	0	0	0	41	0	1	92	1	1	39.1111	1	1	91	0	1	0.55	0	1	313	0	1	1.1	0	1	11	0	1
1	1	2	0	0-60	0	1	0	0	0	0	0	1	1	0	0	0	0	0	0	0	0	0	0	0	0	30	0	1	100	0	1	38.9444	1	1	75.3333	0	1	1.49	0	1	321	0	1	1.1	0	1	11	0	1
1	1	9	0	0-60	2	1	0	0	0	0	0	0	0	0	0	1	1	0	0	0	0	0	0	0	0	55	0	1	94	0	1	37.8333	0	1	99.3333	0	1	1.93	0	1	198	0	1	1	0	1	26	0	1
1	0	0	0	0-60	2	0	0	0	1	0	0	0	0	0	0	1	1	1	0	0	0	0	0	0	0	26	0	1	66	1	1	38.1111	1	1	85	0	1	0.77	0	1	245	0	1	1	0	1	10	0	1
1	1	3	1	>80	8	1	0	0	0	0	0	1	0	0	0	0	0	1	1	1	0	0	0	0	0	82	3	1	100	0	1	35.7778	0	1	53.6667	1	0	0	0	1	194	0	1	1.3	0	1	116	1	1
1	1	3	1	>70	6	1	0	0	0	0	0	0	0	1	0	0	0	0	0	0	0	0	0	0	0	74	2	1	88	1	1	37.5556	0	1	75	0	1	20	1	1	543	0	1	1.2	1	0	0	0	1
1	1	14	1	>60	6	0	0	0	1	0	0	0	1	1	0	0	0	0	0	0	0	0	0	0	0	61	1	1	84	1	1	36.7222	0	1	71.3333	0	1	2.74	0	1	135	1	1	1	0	1	100	1	1
1	1	4	1	>70	2	0	0	0	1	0	0	0	0	0	0	1	1	1	0	0	0	0	0	0	0	80	2	1	97	0	1	36.3889	0	1	110.333	0	1	0.34	0	1	217	0	1	1	0	1	40	1	1
1	1	1	1	>70	9	0	0	0	1	0	1	1	0	0	1	0	0	0	0	0	0	0	0	0	0	77	2	1	88	1	1	36.8889	0	1	66	0	1	3.64	1	1	138	1	1	2.1	1	1	27	0	1
1	1	6	1	0-60	7	0	0	0	1	0	0	0	0	0	0	0	0	1	0	0	0	0	0	0	0	36	0	1	75	1	0	0	0	1	111.333	0	1	9.3	1	1	202	0	1	1.5	1	1	33	1	1
1	1	3	1	>80	9	0	0	0	1	0	0	0	0	0	0	0	0	0	0	0	0	0	0	0	0	92	3	1	65	1	1	37.0556	0	1	32	1	1	16.72	1	1	136	1	1	1.2	1	1	46	1	1
1	1	5	1	>80	4	1	0	0	0	0	0	0	0	0	0	0	0	0	0	0	0	0	0	0	0	83	3	1	97	0	1	38.7222	1	1	81	0	0	0	0	1	208	0	1	1.1	0	1	32	1	1
1	0	0	0	>80	4	0	0	0	1	0	1	0	0	1	0	0	0	0	0	0	0	0	0	0	0	98	3	1	97	0	1	36.1111	0	1	88.3333	0	1	1.99	0	1	261	0	0	0	0	1	42	1	1
1	1	5	0	>80	7	0	0	0	1	1	0	1	0	0	0	0	1	0	0	0	0	0	0	0	0	81	3	1	89	1	1	37	0	1	81.6667	0	1	3.94	1	1	195	0	1	1	1	1	25	0	1
1	1	16	1	0-60	3	0	0	0	1	0	0	0	0	0	0	0	0	0	0	0	0	0	0	0	0	51	0	1	84	1	1	37.2778	0	1	138.333	0	1	2.51	0	1	332	0	1	1.1	0	1	30	0	1
1	1	12	1	>80	5	0	0	0	1	0	0	0	0	0	0	0	1	1	0	0	0	0	0	0	0	87	3	1	96	0	1	37.1111	0	1	61.6667	0	1	2.42	0	1	293	0	1	1.2	0	1	54	1	1
1	1	9	0	>70	8	1	0	0	0	0	0	0	0	0	0	0	0	0	0	0	0	0	0	0	0	76	2	1	80	1	1	36.5556	0	1	99.3333	0	1	19.96	1	1	330	0	1	1.3	1	1	101	1	1
1	1	4	0	>80	4	0	0	0	1	0	0	0	1	1	0	0	0	0	1	1	0	0	0	1	0	82	3	1	99	0	1	36.8333	0	1	101.333	0	0	0	0	1	120	1	1	1.2	0	1	9	0	1
1	0	0	0	0-60	3	0	0	0	0	0	1	1	1	0	0	0	0	0	0	0	0	0	0	0	0	56	0	1	96	0	1	37.1111	0	1	97.3333	0	0	0	0	1	404	0	1	1.2	0	1	44	1	1
1	1	11	0	>70	8	0	0	0	1	0	0	0	0	0	0	0	0	0	0	0	0	0	0	0	0	78	2	1	92	1	1	36.3333	0	1	90.3333	0	1	20	1	1	303	0	1	1.3	1	0	0	0	1
1	1	5	1	>70	4	0	0	0	1	0	0	0	0	0	0	1	1	0	0	0	0	0	0	0	0	73	2	1	73	1	1	36.1111	0	1	88.6667	0	1	0.77	0	1	399	0	1	1.1	0	1	32	1	1
1	1	8	0	>60	4	0	0	0	1	0	1	0	0	0	0	0	0	1	0	0	0	0	0	0	0	69	1	1	82	1	1	37.3333	0	1	87.3333	0	1	2.95	0	1	265	0	1	1.1	0	1	19	0	1
1	1	3	0	0-60	1	0	0	0	1	0	0	0	0	0	0	0	0	0	0	0	0	0	0	0	0	49	0	1	100	0	1	38.7222	1	1	93.3333	0	1	1.03	0	1	191	0	1	1.2	0	1	12	0	1
1	0	0	0	>60	3	1	0	0	0	0	0	0	0	0	0	0	0	0	0	0	0	0	0	0	0	68	1	1	94	0	1	37.6111	0	1	110.667	0	1	0.84	0	1	273	0	1	1.1	0	1	7	0	1
1	1	4	0	>60	3	0	1	0	0	0	0	0	0	0	0	0	0	0	0	0	0	0	0	0	0	65	1	1	91	1	1	36.8333	0	1	96.6667	0	1	2.31	0	1	361	0	1	1.1	0	1	15	0	1
1	1	5	0	>70	4	0	1	0	1	0	0	0	0	0	0	0	0	0	0	0	0	0	0	0	0	74	2	1	93	1	1	37.3333	0	1	95	0	1	0.26999	0	1	160	0	1	1.1	0	1	16	0	1
1	1	8	0	0-60	1	0	1	0	0	0	0	0	0	0	0	0	0	0	0	0	0	0	0	0	0	33	0	1	97	0	1	38.6111	1	0	0	0	1	1.18	0	1	139	1	1	1	0	1	11	0	1
1	1	4	0	0-60	2	0	0	0	1	0	0	0	0	0	0	0	0	0	0	0	0	0	0	0	0	26	0	0	0	1	0	0	0	0	0	0	0	0	0	1	102	1	0	0	0	1	15	0	1
1	0	0	0	>80	8	1	0	0	0	0	2	1	0	1	0	0	0	0	0	0	0	0	0	0	0	86	3	1	88	1	1	36.7222	0	1	120.667	0	1	1.83	0	1	230	0	1	6.2	0	1	62	1	1
1	1	4	0	0-60	3	0	0	0	1	0	1	0	0	0	0	0	0	0	0	0	0	0	0	0	0	50	0	1	89	1	1	37.2778	0	1	89.3333	0	1	1.17	0	1	216	0	1	1.1	0	1	15	0	1
1	1	2	0	>60	1	0	0	0	1	0	1	0	0	1	1	0	0	1	1	1	0	0	0	1	0	67	1	1	97	0	1	36.5556	0	1	113.333	0	0	0	0	1	247	0	1	1.1	0	1	16	0	1
1	1	11	1	>80	8	0	0	0	1	0	0	0	0	0	0	0	0	0	0	0	0	0	0	0	0	86	3	1	100	0	1	39.2222	1	1	64.6667	0	1	1.31	0	1	138	1	1	3	0	1	81	1	1
1	1	10	0	0-60	8	1	0	0	0	0	0	0	0	0	0	0	0	0	0	0	0	0	0	0	0	53	0	1	89	1	1	37.3333	0	1	92	0	1	4.73	1	1	90	2	1	1.3	1	0	0	0	1
1	1	12	0	0-60	2	1	0	0	0	0	0	0	0	0	1	0	0	0	1	1	0	0	0	0	0	60	0	1	96	0	1	37.9444	0	1	89.3333	0	1	3.89	1	1	268	0	1	1.1	1	1	18	0	1
1	1	7	0	0-60	5	0	0	0	1	0	1	0	0	0	0	0	1	1	0	0	0	0	0	0	0	50	0	1	95	0	1	36.7778	0	1	95.6667	0	1	3.62	1	1	351	0	1	1.3	1	1	52	1	1
1	1	13	1	>60	8	1	0	0	0	0	0	0	0	0	0	0	0	0	0	0	0	0	0	0	0	68	1	1	77	1	1	36.4444	0	1	37	1	1	14.78	1	1	192	0	1	1.2	1	1	85	1	1
1	1	5	0	>70	3	1	0	0	0	0	0	0	0	0	0	0	0	0	0	0	0	0	0	0	0	78	2	1	98	0	1	36.7778	0	1	95.3333	0	0	0	0	1	108	1	1	1	0	1	14	0	1
1	1	1	0	>60	2	1	0	0	0	1	0	1	0	0	0	0	1	1	0	0	0	0	0	0	0	62	1	1	98	0	1	37.3333	0	1	90.3333	0	0	0	0	1	268	0	0	0	0	1	16	0	1
1	1	4	0	>80	4	0	0	0	1	1	0	0	0	1	0	0	1	1	0	0	0	0	0	0	0	84	3	1	94	0	1	37.1111	0	1	99.6667	0	1	2.29	0	1	213	0	1	1	0	1	25	0	1
1	1	4	0	>80	4	1	0	0	0	0	0	0	1	0	0	0	0	1	0	0	0	0	0	0	0	83	3	1	94	0	1	36.7222	0	1	99	0	1	0.35	0	1	367	0	1	1.3	0	1	7	0	1
1	1	6	1	>80	5	0	1	0	0	0	0	0	0	0	0	0	0	0	0	0	0	0	0	0	0	86	3	1	99	0	0	0	0	0	0	0	1	2.45	0	1	160	0	1	1.4	0	1	16	0	1
1	1	4	0	>70	3	0	1	0	0	0	0	0	0	0	0	0	0	0	0	0	0	0	0	0	0	75	2	1	98	0	1	36.7778	0	1	88.3333	0	1	1.34	0	1	230	0	1	1.1	0	1	39	1	1
1	1	4	0	0-60	2	0	0	0	1	0	0	0	0	0	0	0	0	0	0	0	0	0	0	0	0	54	0	1	92	1	1	38	0	1	80.3333	0	1	1.04	0	1	159	0	1	1.1	0	1	13	0	1
1	0	0	0	>70	5	0	0	0	1	0	0	0	0	0	0	0	0	0	0	0	0	0	0	0	0	75	2	1	100	0	1	36.8889	0	1	94.6667	0	1	6.89	1	1	107	1	1	1.1	1	1	15	0	1
1	1	1	1	>80	5	0	0	1	0	0	0	0	0	0	0	0	0	0	0	0	0	0	0	0	0	88	3	1	97	0	1	36.5	0	1	97	0	0	0	0	0	0	0	1	1.4	0	1	33	1	1
1	1	3	1	>60	5	0	0	0	1	0	0	0	0	0	0	0	0	0	1	1	0	0	0	0	0	70	1	1	98	0	1	37.5	0	1	92.6667	0	1	20	1	1	572	0	1	1.1	1	1	36	1	1
1	1	10	0	>60	2	1	0	0	0	0	0	0	0	0	0	0	0	0	0	0	0	0	0	0	0	63	1	1	96	0	1	38.0556	1	1	89	0	1	1.88	0	1	208	0	1	1.1	0	1	23	0	1
1	0	0	0	>60	4	0	1	0	0	0	1	0	0	0	0	0	0	0	0	0	0	0	0	0	0	68	1	1	99	0	1	37.6667	0	1	73	0	1	3.33	1	1	151	0	1	1.2	1	1	28	0	1
1	1	3	0	>60	4	0	0	0	1	0	0	0	0	1	0	0	0	0	1	0	0	0	0	0	1	68	1	1	96	0	1	36.8333	0	1	86.3333	0	0	0	0	1	119	1	1	2.2	0	1	16	0	1
1	1	32	0	>70	7	1	0	0	0	1	0	0	0	0	0	0	1	1	0	0	0	0	0	0	0	74	2	1	89	1	1	36.9444	0	1	104.333	0	1	20	1	1	257	0	1	3	1	0	0	0	1
1	1	2	0	>80	6	1	0	0	0	0	0	0	0	0	0	0	0	0	0	0	0	0	0	0	0	90	3	1	94	0	1	38.5	1	1	102	0	1	1.88	0	1	93	2	1	1.1	0	1	10	0	1
1	1	6	0	>80	6	0	0	0	1	0	0	0	0	0	0	0	0	1	0	0	0	0	0	0	0	90	3	1	88	1	1	36.4444	0	1	64.3333	0	1	1.67	0	1	78	2	0	0	0	1	29	0	1
1	1	7	1	>70	7	0	0	0	1	0	0	0	0	0	0	0	0	0	0	0	0	0	0	0	0	79	2	1	79	1	1	36.7222	0	1	67.3333	0	1	2.48	0	1	266	0	1	1.3	0	1	35	1	1
1	0	0	0	>70	5	0	0	0	1	0	0	0	0	0	0	0	0	0	0	0	0	0	0	0	0	79	2	1	94	0	1	36.9444	0	1	69.6667	0	1	2.05	0	1	257	0	1	1.1	0	1	57	1	1
1	1	3	1	>80	4	0	0	0	0	0	0	0	0	0	0	0	0	0	0	0	0	0	0	0	0	81	3	1	100	0	1	38.1111	1	1	112	0	1	0.27	0	1	407	0	1	1.1	0	1	10	0	1
1	1	5	0	0-60	0	0	0	0	1	0	1	0	0	0	0	1	1	0	0	0	0	0	0	0	0	44	0	1	97	0	1	37.7778	0	1	105	0	0	0	0	1	220	0	0	0	0	1	8	0	1
1	1	8	0	>70	2	1	0	0	0	0	1	0	1	0	0	0	0	0	0	0	0	0	0	0	0	72	2	1	100	0	1	36.8889	0	1	103	0	1	0.55	0	1	483	0	1	1.1	0	1	8	0	1
1	1	13	1	>60	2	1	0	0	0	0	0	0	0	0	0	0	0	1	0	0	0	0	0	0	0	61	1	1	94	0	1	37.5	0	1	66.6667	0	0	0	0	1	180	0	1	1.1	0	1	13	0	1
1	1	5	0	>60	2	0	0	0	0	0	0	0	0	0	0	0	0	0	0	0	0	0	0	0	0	62	1	1	96	0	1	37.2778	0	1	87.6667	0	1	1.89	0	1	242	0	1	1.1	0	1	22	0	1
1	1	6	1	>70	5	1	0	0	0	0	0	0	0	0	0	0	0	0	0	0	0	0	0	0	0	76	2	1	98	0	1	35.1667	0	1	88.3333	0	1	18.93	1	1	207	0	1	1.4	1	1	130	1	1
1	1	16	1	>60	3	0	0	0	0	0	1	1	0	0	1	0	0	1	0	0	0	0	0	0	0	67	1	1	93	1	1	37.2222	0	1	65.6667	0	1	2.34	0	1	143	1	1	1	0	1	35	1	1
1	1	2	0	0-60	3	1	0	0	0	0	2	0	1	0	0	0	0	0	0	0	0	0	0	0	0	60	0	1	97	0	1	36.8333	0	1	83.6667	0	0	0	0	1	648	0	1	17.0001	0	1	23	0	1
1	1	5	0	>70	4	1	0	0	0	1	1	0	1	0	0	1	1	0	0	0	0	0	0	0	0	74	2	1	96	0	1	36.5556	0	1	80	0	1	20	1	1	184	0	1	1.5	1	1	17	0	1
1	1	1	1	>60	4	0	0	0	1	0	0	0	0	0	0	0	0	0	1	1	0	0	0	0	0	70	1	1	97	0	1	37.3333	0	1	114.667	0	1	12.59	1	1	328	0	1	1.1	1	1	15	0	1
1	1	3	0	>60	2	0	0	0	1	0	1	0	0	0	0	1	1	0	0	0	0	0	0	0	0	67	1	1	96	0	1	38.6111	1	1	115.667	0	1	2.09	0	1	259	0	1	1.2	0	1	11	0	1
1	1	4	0	>70	4	0	1	0	0	0	0	0	0	0	0	1	1	0	1	1	0	0	1	0	0	75	2	0	0	1	0	0	0	0	0	0	1	2.4	0	1	139	1	1	1.1	0	1	43	1	1
1	1	2	0	0-60	2	0	0	0	1	0	0	0	0	0	0	0	0	0	0	0	0	0	0	0	0	48	0	1	100	0	1	36	0	1	82	0	1	0	0	1	287	0	1	0.9	0	1	35	1	1
1	1	12	0	>60	4	1	0	0	0	0	0	0	0	0	0	0	0	0	0	0	0	0	0	0	0	61	1	1	96	0	1	37.5556	0	1	93	0	1	1.69	0	1	155	0	1	1.1	0	1	28	0	1
1	1	2	0	>60	4	1	0	0	0	0	0	0	0	0	1	0	0	0	0	0	0	0	0	0	0	65	1	1	95	0	1	36.6111	0	1	95.3333	0	1	6.21	1	1	278	0	1	1.1	1	1	35	1	1
1	1	1	0	>60	6	0	0	0	1	0	0	0	1	0	0	0	0	1	0	0	0	0	0	0	0	68	1	1	96	0	1	36.5556	0	1	121.667	0	1	5.88	1	1	125	1	1	1.2	1	1	53	1	1
1	1	2	1	>80	7	0	0	0	1	0	0	0	0	0	0	0	0	0	0	0	0	0	0	0	0	84	3	1	96	0	1	36.8333	0	1	69	0	1	3.02	1	1	186	0	1	1.4	1	1	122	1	1
1	1	2	0	0-60	0	0	0	0	1	0	0	0	0	0	0	0	0	0	0	0	0	0	0	0	0	51	0	1	98	0	1	36.8333	0	1	78.6667	0	1	0.48	0	1	253	0	1	1	0	1	8	0	1
1	0	0	0	>60	5	1	0	0	0	0	0	0	0	0	0	0	0	0	0	0	0	0	0	0	0	69	1	1	90	1	1	37.9444	0	1	115.667	0	1	1.22	0	1	197	0	1	1.3	0	1	99	1	1
1	1	9	1	0-60	3	1	0	0	0	0	0	1	0	0	0	0	0	0	0	0	0	0	0	0	0	51	0	1	90	1	1	37.0556	0	1	97.6667	0	0	0	0	1	286	0	1	1.2	0	1	61	1	1
1	1	6	0	0-60	3	1	0	0	0	0	0	0	0	0	0	0	0	0	0	0	0	0	0	0	0	60	0	1	98	0	1	36.8889	0	1	82	0	1	0.71	0	1	111	1	1	1	0	1	30	0	1
1	1	4	0	>70	4	0	0	0	1	0	0	0	0	0	0	1	1	0	0	0	0	0	0	0	0	71	2	1	96	0	1	38.3333	1	1	83	0	1	0.77	0	1	216	0	1	1	0	1	9	0	1
1	0	0	0	>60	6	1	0	0	0	0	0	0	0	0	0	0	0	0	0	0	0	0	0	0	0	69	1	1	97	0	1	36.7222	0	1	79.3333	0	1	3.18	1	1	186	0	1	1.1	1	1	136	1	1
1	1	19	1	0-60	4	1	0	0	0	1	0	1	0	0	0	0	1	1	0	0	0	0	0	0	0	55	0	1	95	0	1	39.2222	1	1	39	1	1	2.77	0	1	113	1	1	1.1	0	0	0	0	1
1	1	2	1	>80	11	0	0	0	1	0	0	0	0	0	1	0	0	0	0	0	0	0	0	0	0	88	3	1	90	1	1	36.6111	0	1	63	1	1	20	1	1	102	1	1	3.9	1	1	104	1	1
1	1	6	0	0-60	2	0	0	0	1	0	1	0	0	0	0	0	0	0	0	0	0	0	0	0	0	32	0	1	94	0	1	36.7222	0	1	116	0	0	0	0	1	240	0	0	0	0	1	17	0	1
1	1	6	0	0-60	2	1	0	0	0	0	0	0	0	0	0	0	0	0	0	0	0	0	0	0	0	57	0	1	91	1	1	37.9444	0	1	77	0	1	0.83	0	1	227	0	1	1	0	1	16	0	1
1	1	7	0	0-60	2	0	0	0	1	0	0	0	0	0	0	1	1	1	0	0	0	0	0	0	0	33	0	1	88	1	1	37	0	1	79	0	1	1.01	0	1	217	0	1	1.1	0	1	15	0	1
1	1	6	1	>80	7	0	0	0	1	1	0	0	1	0	0	0	1	0	0	0	0	0	0	0	0	83	3	1	95	0	1	37.7778	0	1	110	0	1	1.25	0	1	192	0	1	3.7	0	1	56	1	1
1	1	5	0	>60	5	0	0	0	1	0	0	0	0	0	0	0	0	0	0	0	0	0	0	0	0	68	1	1	82	1	1	37.2222	0	1	82	0	1	0.56	0	1	324	0	1	2.8	0	1	47	1	1
1	1	2	0	0-60	0	1	0	0	0	0	0	0	0	0	0	0	0	0	0	0	0	0	0	0	0	45	0	1	100	0	1	36.2222	0	1	112.667	0	1	0.27	0	1	306	0	1	1	0	1	11	0	1
1	1	9	0	>60	1	0	0	0	1	0	0	0	0	0	0	0	0	0	0	0	0	0	0	0	0	63	1	1	94	0	1	38.2778	1	1	88.3333	0	0	0	0	1	160	0	1	1	0	1	16	0	1
1	1	6	0	>70	3	0	0	0	1	0	1	1	0	0	0	0	0	0	0	0	0	0	0	0	0	74	2	0	0	1	0	0	0	0	0	0	0	0	0	0	0	0	0	0	0	0	0	0	0
1	1	6	0	>60	1	0	1	0	1	0	0	1	0	0	0	0	0	0	0	0	0	0	0	0	0	62	1	1	97	0	1	36.9444	0	1	105	0	0	0	0	1	232	0	1	1.1	0	1	20	0	1
1	1	7	0	>60	3	0	0	0	0	0	1	0	0	0	0	0	0	0	0	0	0	0	0	0	0	69	1	1	100	0	1	37.5556	0	1	105	0	1	0	0	1	0	2	1	0	0	0	0	0	0
1	1	1	0	>70	2	0	0	0	1	0	0	0	1	0	1	0	0	1	0	0	0	0	0	0	0	74	2	1	98	0	1	37.4444	0	1	93.3333	0	1	1.51	0	1	426	0	1	1	0	1	21	0	1
1	1	13	0	0-60	1	1	0	0	0	0	0	0	0	0	0	1	1	0	0	0	0	0	0	0	0	43	0	1	95	0	1	37.6111	0	1	79	0	1	0.41	0	1	227	0	1	1	0	0	0	0	1
1	1	5	0	>70	3	1	0	0	0	1	0	1	0	1	0	0	1	0	1	1	0	0	0	0	0	77	2	1	95	0	1	37.2778	0	1	65.6667	0	0	0	0	1	279	0	1	1.1	0	1	25	0	1
1	1	2	1	0-60	3	0	0	0	1	0	0	0	0	0	0	0	0	0	0	0	0	0	0	0	0	46	0	1	95	0	1	38.6667	1	0	0	0	1	0.26999	0	1	102	1	1	1.5	0	1	21	0	1
1	1	6	0	>60	6	0	0	0	1	0	0	0	0	0	0	0	0	0	0	0	0	0	0	0	0	65	1	1	89	1	1	37.9444	0	1	86	0	1	4.06	1	1	158	0	1	1.1	1	1	35	1	1
1	1	4	0	0-60	0	0	0	0	1	0	1	1	0	0	0	1	1	1	0	0	0	0	0	0	0	60	0	1	94	0	1	36.8889	0	1	82.3333	0	0	0	0	1	209	0	1	1	0	1	41	1	1
1	1	4	0	0-60	2	1	0	0	0	0	0	0	0	0	0	0	0	0	0	0	0	0	0	0	0	50	0	1	100	0	1	36.1667	0	1	76.6667	0	1	4.26	1	1	413	0	1	1.1	1	1	18	0	1
1	1	11	0	>60	5	0	0	0	1	0	0	0	0	0	0	0	0	0	0	0	0	0	0	0	0	63	1	1	91	1	1	37.0556	0	1	68	0	0	0	0	1	216	0	1	1.1	0	1	80	1	1
1	1	6	0	>60	4	1	0	0	0	0	0	0	0	0	0	0	0	0	0	0	0	0	0	0	0	69	1	1	97	0	1	37.1111	0	1	94	0	1	2.6	0	1	116	1	1	1.2	0	1	39	1	1
1	1	3	1	>70	7	1	0	0	0	0	0	1	0	1	0	0	0	0	1	1	0	0	0	0	0	72	2	1	89	1	1	36.7222	0	1	64.6667	0	1	20	1	1	132	1	1	1.1	1	1	51	1	1
1	1	6	0	>70	9	1	0	0	0	0	0	0	0	0	0	0	0	0	0	0	0	0	0	0	0	75	2	1	92	1	1	36.5	0	1	98.6667	0	1	5.26	1	1	258	0	1	1.3	1	1	51	1	1
1	1	9	0	>80	5	0	0	0	1	0	1	0	1	0	1	0	0	1	0	0	0	0	0	0	0	84	3	1	100	0	1	36.7222	0	1	76	0	0	0	0	1	144	1	1	1.2	0	1	26	0	1
1	1	7	0	0-60	6	1	0	0	0	0	0	0	0	0	0	0	0	0	0	0	0	0	0	0	0	47	0	1	100	0	1	36.7222	0	1	80	0	1	5.3	1	1	8	2	1	1.2	1	1	98	1	1
1	1	15	1	>60	5	0	0	0	1	0	0	1	0	0	0	1	1	1	0	0	0	0	0	0	0	68	1	1	96	0	1	38.4444	1	1	119.333	0	1	16.39	1	1	312	0	1	1.3	1	1	8	0	1
1	0	0	0	>60	4	1	0	0	0	0	0	0	0	0	0	0	0	0	0	0	0	0	0	0	0	62	1	1	86	1	1	36.5556	0	1	75.3333	0	1	4.48	1	1	231	0	1	1	1	1	11	0	1
1	1	6	0	0-60	3	0	0	0	1	0	1	1	1	1	0	1	1	1	0	0	0	0	0	0	0	54	0	1	95	0	1	37.3889	0	1	95.3333	0	0	0	0	1	149	1	1	1.5	0	1	19	0	1
1	1	6	0	0-60	2	1	0	0	0	0	0	0	0	0	0	0	0	1	0	0	0	0	0	0	0	57	0	1	93	1	1	36.8889	0	1	105.667	0	1	0.55	0	1	205	0	1	1.1	0	1	18	0	1
1	1	11	0	>60	4	0	0	0	0	0	0	0	0	0	0	0	0	0	0	0	0	0	0	0	0	68	1	1	94	0	1	36.8333	0	1	86.3333	0	1	1.07	0	1	148	1	1	1	0	0	0	0	1
1	0	0	0	>80	4	1	0	0	0	0	1	1	0	0	0	0	0	0	0	0	0	0	0	0	0	83	3	1	100	0	1	36.4444	0	1	79	0	1	20	1	1	228	0	1	1	1	1	15	0	1
1	1	4	0	0-60	0	0	1	0	0	0	0	1	0	0	1	0	0	0	0	0	0	0	0	0	0	33	0	1	97	0	1	37.1111	0	1	82.6667	0	0	0	0	1	241	0	1	1	0	1	11	0	1
1	1	11	0	>70	7	0	0	0	1	0	0	0	0	0	0	0	0	1	0	0	0	0	0	0	0	77	2	1	98	0	1	36.7778	0	1	79	0	1	7.05	1	1	346	0	1	1.3	1	1	91	1	1
1	1	1	0	>60	1	0	0	0	1	0	0	0	0	0	0	0	0	0	0	0	0	0	0	0	0	63	1	1	99	0	1	36.2778	0	1	102	0	1	0.73	0	1	352	0	1	0.9	0	1	14	0	1
1	1	4	1	>80	8	1	0	0	0	0	0	1	1	1	0	1	1	1	0	0	0	0	0	0	0	83	3	1	95	0	1	37.1667	0	1	56.6667	0	0	0	0	1	117	1	1	1.2	0	1	62	1	1
1	1	2	1	>80	5	1	0	0	0	0	0	0	0	0	0	1	1	0	0	0	0	0	0	0	0	93	3	1	98	0	1	35.2222	0	1	118.333	0	0	0	0	1	215	0	1	1	0	1	66	1	1
1	1	17	0	0-60	1	0	0	0	0	0	0	0	0	0	0	0	0	0	0	0	0	0	0	0	0	55	0	1	100	0	1	36.8889	0	1	88.3333	0	1	0.82	0	1	179	0	1	0.9	0	1	51	1	1
1	1	9	0	>70	3	0	1	0	0	0	0	0	0	0	0	0	0	0	1	1	0	0	0	1	0	76	2	1	96	0	1	36.4444	0	1	74	0	0	0	0	1	147	1	1	1.1	0	1	22	0	1
1	1	10	0	>70	7	0	0	0	0	0	1	0	1	1	0	0	0	0	0	0	0	0	0	0	0	72	2	1	95	0	1	38.6111	1	1	87.3333	0	1	7.87	1	1	95	2	1	1	1	1	16	0	1
1	1	5	1	>60	3	0	0	0	0	0	0	0	0	0	0	0	0	0	0	0	0	0	0	0	0	63	1	1	95	0	1	36.6667	0	1	93.3333	0	1	2.25	0	1	331	0	1	1.2	0	1	72	1	1
1	1	3	0	0-60	2	0	0	0	1	0	0	0	0	0	0	0	0	0	1	1	0	0	0	1	0	25	0	1	98	0	1	36.6667	0	1	105.667	0	1	1.39	0	1	132	1	1	1.1	0	1	9	0	1
1	1	6	0	0-60	2	0	0	0	0	0	0	0	0	0	0	1	1	0	0	0	0	0	0	0	0	55	0	1	94	0	1	39.4444	1	1	94.6667	0	1	2.03	0	1	138	1	1	1.1	0	1	15	0	1
1	1	4	0	>60	3	0	0	0	0	0	0	0	0	1	0	0	0	0	0	0	0	0	0	0	0	64	1	1	99	0	1	36.9444	0	1	105	0	1	0.42	0	1	184	0	1	1.3	0	1	35	1	1
1	0	0	0	>60	1	0	0	0	1	0	1	1	1	1	0	0	0	0	0	0	0	0	0	0	0	66	1	1	100	0	1	36.1667	0	1	82.3333	0	1	0.87	0	1	405	0	1	1.2	0	1	31	1	1
1	1	3	0	>60	2	0	0	0	1	0	0	0	0	0	0	0	0	0	0	0	0	0	0	0	0	65	1	1	100	0	1	36.5556	0	1	97.6667	0	1	0.49	0	1	281	0	1	1.1	0	1	13	0	1
1	1	9	0	>60	7	1	0	0	0	0	0	0	0	0	0	0	0	1	0	0	0	0	0	0	0	69	1	1	97	0	1	38.0556	1	1	95.3333	0	1	2.88	0	1	91	2	1	1.3	0	1	21	0	1
1	1	11	0	0-60	0	0	0	0	0	0	0	0	1	1	0	0	0	0	0	0	0	0	0	0	0	24	0	1	100	0	1	36.8333	0	1	91.6667	0	0	0	0	1	281	0	0	0	0	1	11	0	1
1	1	2	0	>60	2	0	0	0	1	0	0	0	0	0	0	0	0	0	0	0	0	0	0	0	0	66	1	0	0	1	0	0	0	0	0	0	0	0	0	0	0	0	0	0	0	0	0	0	0
1	1	8	1	>60	3	0	0	0	1	0	0	0	0	0	0	0	0	0	0	0	0	0	0	0	0	65	1	1	95	0	1	36.7222	0	1	107.333	0	0	0	0	1	146	1	1	1	0	1	14	0	1
1	1	12	1	>60	5	1	0	0	0	0	1	0	0	0	0	0	0	1	0	0	0	0	0	0	0	70	1	1	81	1	1	36.8333	0	1	69	0	1	1.38	0	1	129	1	1	0.9	0	1	39	1	1
1	1	2	0	0-60	1	0	0	0	1	0	1	0	0	0	0	0	0	0	0	0	0	0	0	0	0	36	0	1	97	0	1	36.5556	0	1	94	0	1	10.55	1	0	0	0	1	1	1	1	8	0	1
1	0	0	0	>70	10	0	1	0	0	0	1	0	1	0	0	0	0	0	0	0	0	0	0	0	0	79	2	1	88	1	1	39.1667	1	1	71.3333	0	1	20	1	1	117	1	1	1.3	1	1	45	1	1
1	1	56	0	0-60	1	0	0	0	1	0	0	0	0	0	1	0	0	0	1	1	0	0	0	0	0	57	0	1	81	1	1	36.5556	0	1	81.3333	0	1	2.41	0	1	338	0	1	1	0	0	0	0	1
1	1	9	0	0-60	4	0	0	0	1	0	0	0	0	0	0	0	0	1	0	0	0	0	0	0	0	53	0	1	93	1	1	37.1667	0	1	88.6667	0	1	1.81	0	1	38	2	1	1	0	1	19	0	1
1	1	6	0	0-60	2	0	0	0	1	0	0	0	0	0	1	0	0	0	0	0	0	0	0	0	0	47	0	1	98	0	1	37.2222	0	1	87	0	1	2.2	0	1	57	2	1	1.2	0	1	21	0	1
1	1	2	0	0-60	2	1	0	0	0	0	0	0	0	0	0	0	0	1	0	0	0	0	0	0	0	52	0	1	95	0	1	37.5556	0	1	79	0	0	0	0	1	188	0	0	0	0	1	13	0	1
1	1	19	0	0-60	2	1	0	0	0	0	0	1	1	1	0	0	0	1	0	0	0	0	0	0	0	50	0	1	97	0	1	38.0556	1	1	91	0	1	1.14	0	1	196	0	1	0.9	0	1	34	1	1
1	0	0	0	>80	5	0	0	0	0	0	1	0	0	0	0	0	0	0	0	0	0	0	0	0	0	84	3	1	97	0	1	36.5	0	1	85	0	1	5.42	1	1	537	0	1	1.1	1	1	9	0	1
1	1	28	1	>60	7	1	0	0	0	0	0	0	0	0	0	0	0	0	0	0	0	0	0	0	0	67	1	1	92	1	1	39.4444	1	1	71.3333	0	1	4.66	1	1	143	1	1	1.1	1	0	0	0	1
1	1	8	0	>60	2	0	0	0	1	0	0	0	0	0	0	0	0	0	0	0	0	0	0	0	0	61	1	1	93	1	1	38.5	1	1	90.3333	0	1	0.6	0	1	158	0	1	1.1	0	1	7	0	1
1	1	2	0	>80	8	1	0	0	0	0	0	0	0	0	0	0	0	0	0	0	0	0	0	0	0	95	3	1	93	1	1	36.4444	0	1	76.6667	0	1	20	1	1	105	1	1	1.1	1	1	27	0	1
1	1	13	0	>60	3	1	0	0	0	0	0	0	0	0	0	0	0	0	1	1	0	0	0	1	0	69	1	1	96	0	1	37	0	1	107.333	0	1	20	1	1	156	0	1	1	1	1	13	0	1
1	1	12	0	0-60	5	1	0	0	0	0	0	1	0	0	0	0	0	0	0	0	0	0	0	0	0	59	0	1	95	0	1	36.8333	0	1	82.3333	0	1	4.96	1	1	247	0	1	1.5	1	0	0	0	1
1	1	12	1	>60	5	1	0	0	0	0	0	0	0	0	0	0	0	0	0	0	0	0	0	0	0	70	1	1	79	1	1	36	0	1	111.667	0	1	3.74	1	1	190	0	1	1.2	1	1	98	1	1
1	1	5	0	>60	1	0	0	0	0	0	0	1	1	0	0	0	0	1	0	0	0	0	0	0	0	62	1	1	100	0	1	36.1667	0	1	87	0	1	0.44	0	1	201	0	1	1	0	1	9	0	1
1	1	2	0	>60	3	0	0	0	0	0	0	0	0	0	0	0	0	1	0	0	0	0	0	0	0	61	1	1	87	1	1	37.0556	0	1	79.3333	0	1	0.61	0	1	246	0	1	1	0	1	16	0	1
1	1	10	1	>70	8	0	0	0	1	0	0	0	1	0	0	0	0	1	0	0	0	0	0	0	0	77	2	1	86	1	1	38.0556	1	1	99.6667	0	1	4.17	1	1	289	0	1	1.4	1	1	94	1	1
1	1	8	1	>70	6	1	0	0	0	0	0	1	0	0	0	0	0	1	1	1	0	0	0	0	0	79	2	1	89	1	1	39.2778	1	1	92.6667	0	1	3.06	1	1	107	1	0	0	1	1	10	0	1
1	1	4	1	>60	3	0	1	0	0	0	0	0	0	0	0	0	0	0	0	0	0	0	0	0	0	67	1	1	100	0	1	40	1	1	44.3333	1	0	0	0	1	183	0	1	1.1	0	1	16	0	1
1	1	26	1	>80	7	0	1	0	0	0	0	0	0	0	0	0	0	1	0	0	0	0	0	0	0	82	3	1	94	0	1	37.7778	0	1	57	1	1	3.53	1	1	138	1	1	0.9	1	1	10	0	1
1	1	4	0	>80	4	0	0	0	1	0	0	0	0	0	0	0	0	0	0	0	0	0	0	0	0	82	3	1	95	0	1	36.5	0	1	85	0	1	1.59	0	1	237	0	1	1	0	1	9	0	1
1	1	24	1	>70	7	0	0	0	1	0	0	0	0	0	0	0	0	0	0	0	0	0	0	0	0	77	2	1	68	1	1	38.1667	1	1	32.6667	1	1	0.27	0	1	259	0	1	2.1	0	0	0	0	1
1	1	12	0	0-60	3	0	0	0	1	0	1	0	0	0	0	1	1	1	0	0	0	0	0	0	0	49	0	1	97	0	1	37.1111	0	1	114.333	0	1	3.87	1	1	113	1	1	0.9	1	1	12	0	1
1	1	2	0	>70	3	1	0	0	0	0	1	0	1	0	0	1	1	1	0	0	0	0	0	0	0	79	2	1	97	0	1	37.6667	0	1	90.3333	0	1	1.12	0	1	232	0	1	1.1	0	1	14	0	1
1	1	4	0	>70	3	0	0	0	0	0	1	0	0	0	0	0	0	0	0	0	0	0	0	0	0	71	2	1	95	0	1	37.1111	0	1	95	0	1	8.4	1	1	224	0	1	1	1	1	18	0	1
1	1	19	1	>70	4	1	0	0	0	0	0	0	0	0	0	0	0	0	0	0	0	0	0	0	0	76	2	1	78	1	1	39.5	1	1	83	0	1	1.65	0	1	143	1	1	0.9	0	1	64	1	1
1	1	21	0	>60	2	0	1	0	1	0	0	0	0	0	0	0	0	1	0	0	0	0	0	0	0	68	1	1	95	0	1	39.4444	1	1	73	0	1	0.69	0	1	191	0	1	1.2	0	1	47	1	1
1	1	6	1	>70	7	1	0	0	0	0	0	0	0	0	0	0	0	0	0	0	0	0	0	0	0	75	2	1	79	1	1	38.3333	1	1	47.3333	1	1	20	1	1	425	0	1	1.1	1	0	0	0	1
1	1	18	0	>60	6	1	0	0	0	0	0	0	0	0	0	0	0	0	0	0	0	0	0	0	0	69	1	1	100	0	1	36.3889	0	1	69.3333	0	1	2.93	0	1	205	0	1	1.3	0	1	38	1	1
1	1	4	0	>70	5	0	1	0	0	0	0	0	0	1	0	0	0	1	0	0	0	0	0	0	0	73	2	1	97	0	1	37.5556	0	1	89.3333	0	0	0	0	1	125	1	1	1.9	0	1	31	1	1
1	0	0	0	0-60	0	0	0	0	1	0	1	0	0	0	0	0	0	0	0	0	0	0	0	0	0	59	0	1	98	0	1	36.3333	0	1	79.3333	0	1	0.76	0	1	344	0	1	1	0	1	13	0	1
1	0	0	0	>70	4	0	0	0	1	0	0	0	0	0	0	0	0	0	0	0	0	0	0	0	0	75	2	1	98	0	1	38.2222	1	1	86.6667	0	1	1.38	0	1	213	0	1	1	0	1	18	0	1
1	1	8	0	0-60	1	0	1	0	0	1	1	1	0	0	0	0	1	1	0	0	0	0	0	0	0	42	0	1	96	0	1	36.5556	0	1	76.6667	0	0	0	0	1	168	0	1	1	0	1	32	1	1
1	1	14	0	>70	3	0	0	0	1	0	0	0	0	0	0	0	0	0	0	0	0	0	0	0	0	77	2	1	98	0	1	37.2778	0	1	79	0	1	1.41	0	1	189	0	1	1.1	0	1	19	0	1
1	1	27	0	>70	4	0	0	0	1	0	0	0	0	0	0	0	0	0	0	0	0	0	0	0	0	74	2	1	94	0	1	36.3889	0	1	88	0	1	16.78	1	1	242	0	1	1.1	1	1	9	0	1
1	1	11	0	>80	8	0	0	0	0	0	0	0	0	0	0	0	0	0	0	0	0	0	0	0	0	81	3	1	76	1	1	37.1667	0	1	88.3333	0	1	3.68	1	1	237	0	1	1.2	1	1	43	1	1
1	1	5	1	>80	7	1	0	0	0	0	0	0	0	1	0	0	0	1	0	0	0	0	0	0	0	87	3	1	91	1	1	36.3333	0	1	92.3333	0	0	0	0	1	106	1	1	1.1	0	1	115	1	1
1	1	3	0	>70	4	1	0	0	0	0	0	0	0	0	0	0	0	0	1	1	0	0	1	0	0	79	2	1	97	0	1	36.7778	0	1	91.6667	0	0	0	0	1	39	2	1	1	0	1	19	0	1
1	1	5	0	>80	6	1	0	0	0	0	0	0	0	0	0	0	0	0	0	0	0	0	0	0	0	84	3	1	93	1	1	37.0556	0	1	106	0	1	2.7	0	1	210	0	0	0	0	1	13	0	1
1	1	3	0	0-60	0	0	0	0	1	0	0	1	0	0	0	0	0	0	0	0	0	0	0	0	0	44	0	1	99	0	1	37.0556	0	1	81	0	0	0	0	1	199	0	1	0.9	0	1	10	0	1
1	1	4	0	0-60	3	1	0	0	0	0	0	0	0	0	0	0	0	0	1	1	0	0	0	0	0	49	0	1	80	1	1	37.8889	0	1	100.667	0	1	2.95	0	1	194	0	1	1.2	0	1	49	1	1
1	0	0	0	>60	2	1	0	0	0	0	1	0	0	0	0	0	0	0	0	0	0	0	0	0	0	63	1	1	95	0	1	39	1	1	87.6667	0	1	1.85	0	1	155	0	1	1.1	0	1	22	0	1
1	1	6	0	0-60	5	1	0	0	0	0	0	0	0	0	0	1	1	1	0	0	0	0	0	0	0	60	0	1	92	1	1	37.4444	0	1	66.6667	0	1	2.47	0	1	259	0	1	1.2	0	1	26	0	1
1	1	4	1	>70	5	1	0	0	0	0	0	0	0	0	0	0	0	0	0	0	0	0	0	0	0	75	2	1	70	1	1	36.6667	0	1	99.3333	0	0	0	0	1	261	0	0	0	0	1	45	1	1
1	1	2	0	>60	1	1	0	0	0	0	0	0	0	0	0	0	0	0	0	0	0	0	0	0	0	67	1	1	100	0	1	37.2222	0	1	91.6667	0	0	0	0	1	191	0	1	1.1	0	1	13	0	1
1	1	13	0	>70	7	1	0	0	0	0	0	1	0	0	1	0	0	1	0	0	0	0	0	0	0	77	2	1	95	0	1	37.5556	0	1	86.3333	0	0	0	0	1	81	2	1	1.1	0	1	30	0	1
1	1	4	1	>70	8	1	0	0	0	0	0	0	0	0	0	0	0	0	1	1	0	0	0	1	0	75	2	1	83	1	1	36.4444	0	1	59.3333	1	1	20	1	1	407	0	1	1.2	1	0	0	0	1
1	1	1	0	>60	2	1	0	0	0	0	1	1	0	0	0	0	0	1	0	0	0	0	0	0	0	61	1	1	90	1	1	37.2222	0	1	72	0	1	0.38	0	1	244	0	1	1.1	0	1	16	0	1
1	1	2	0	0-60	0	0	0	0	1	0	0	1	0	0	0	1	1	1	0	0	0	0	0	0	0	24	0	1	98	0	1	37.7222	0	1	75.3333	0	0	0	0	1	254	0	1	1	0	0	0	0	0
1	1	3	0	>60	1	0	0	0	1	0	0	0	0	0	0	0	0	0	0	0	0	0	0	0	0	62	1	1	95	0	1	39.5556	1	1	92.3333	0	1	0.8	0	1	312	0	1	1	0	1	13	0	1
1	1	6	0	0-60	3	0	1	0	1	0	1	1	1	0	0	0	0	0	0	0	0	0	0	0	0	57	0	1	95	0	1	36.7778	0	1	79	0	1	1.37	0	1	143	1	1	1.2	0	1	13	0	1
1	1	8	0	>70	4	0	0	0	1	0	0	0	0	0	0	0	0	1	0	0	0	0	0	0	0	77	2	1	99	0	1	37.2778	0	1	90.6667	0	1	0.64	0	1	114	1	1	0.9	0	1	27	0	1
1	1	13	0	0-60	4	1	0	0	0	0	0	1	0	1	0	0	0	1	0	0	0	0	0	0	0	49	0	1	96	0	1	37.3333	0	1	77	0	1	3.67	1	1	136	1	1	1.1	1	1	14	0	1
1	1	1	0	>80	4	1	0	0	0	0	0	0	0	0	0	0	0	0	0	0	0	0	0	0	0	82	3	1	100	0	1	36.4444	0	1	94.3333	0	1	0.51	0	1	183	0	1	1.7	0	1	29	0	1
1	1	3	1	>80	6	0	0	0	1	0	0	0	0	0	0	0	0	0	1	1	0	0	0	1	0	88	3	1	82	1	1	36.7778	0	1	61.3333	0	1	1.16	0	1	169	0	1	1	0	1	32	1	1
1	1	16	0	0-60	2	0	0	0	1	0	0	0	0	0	0	0	0	1	0	0	0	0	0	0	0	58	0	1	98	0	1	36.7222	0	1	95	0	1	0.82	0	1	249	0	1	1	0	1	8	0	1
1	1	5	1	0-60	5	0	0	0	1	0	0	0	0	0	0	0	0	0	1	1	0	0	0	0	0	58	0	1	93	1	1	38.3333	1	1	97.6667	0	1	1.83	0	1	107	1	1	1.1	0	1	80	1	1
1	1	8	1	>70	7	0	0	0	1	0	0	0	0	0	0	0	0	0	0	0	0	0	0	0	0	75	2	1	83	1	1	36.7778	0	1	85	0	1	17.68	1	1	206	0	1	1.1	1	0	0	0	1
1	1	2	0	0-60	0	0	0	0	0	0	0	0	0	0	0	1	1	0	0	0	0	0	0	0	0	27	0	1	100	0	1	36.6667	0	1	98	0	0	0	0	1	201	0	0	0	0	1	4.999	0	1
1	1	6	1	>80	5	0	1	0	0	0	0	0	0	0	0	0	0	0	0	0	0	0	0	0	0	88	3	1	92	1	1	37.2778	0	1	86.6667	0	0	0	0	1	158	0	1	2.4	0	1	32	1	1
1	0	0	0	>60	4	0	0	0	1	0	0	1	1	0	0	0	0	1	0	0	0	0	0	0	0	64	1	1	86	1	1	38	0	1	97.3333	0	1	1.61	0	1	194	0	1	1.1	0	1	12	0	1
1	1	1	0	>60	3	1	0	0	0	1	1	1	1	0	0	1	1	1	0	0	0	0	0	0	0	65	1	1	99	0	1	37.1111	0	1	87.3333	0	1	0	0	1	0	2	1	0	0	0	0	0	0
1	1	6	1	>70	5	1	0	0	0	0	0	0	0	0	0	1	1	0	1	1	0	0	0	1	0	79	2	1	100	0	1	37.3333	0	1	66.6667	0	0	0	0	1	223	0	1	1	0	1	43	1	1
1	1	39	0	>70	4	0	0	0	1	0	0	0	0	0	0	0	0	0	0	0	0	0	0	0	0	72	2	1	95	0	1	38.2778	1	1	86.3333	0	1	12.37	1	1	221	0	1	1.2	1	1	22	0	1
1	1	5	0	0-60	2	0	1	0	0	0	0	1	0	1	0	0	0	0	0	0	0	0	0	0	0	60	0	1	91	1	1	37.5	0	1	112	0	1	3.06	1	1	154	0	1	1	1	1	18	0	1
1	1	19	1	0-60	4	1	0	0	0	0	0	0	0	0	0	0	0	1	1	1	0	0	0	0	0	40	0	1	100	0	1	37.2778	0	1	95.6667	0	1	6.49	1	1	218	0	1	1.5	1	1	29	0	1
1	1	11	0	>80	5	0	0	0	0	0	0	0	0	0	0	0	0	0	0	0	0	0	0	0	0	88	3	1	94	0	1	36.3333	0	1	65.6667	0	1	7.42	1	1	256	0	1	1	1	1	59	1	1
1	1	8	0	0-60	4	0	0	0	1	0	1	0	0	0	0	1	1	1	1	1	0	0	0	0	0	53	0	1	87	1	1	37.7778	0	1	93.3333	0	1	3.34	1	1	186	0	1	1.2	1	1	63	1	1
1	1	4	1	0-60	4	0	0	0	1	0	0	0	0	0	0	1	1	1	0	0	0	0	0	0	0	60	0	1	68	1	1	36.8889	0	1	37.3333	1	0	0	0	1	170	0	1	1	0	1	30	0	1
1	1	10	1	>70	3	1	0	0	0	0	0	0	0	1	1	0	0	0	0	0	0	0	0	0	0	75	2	1	93	1	1	37.7222	0	1	83.6667	0	0	0	0	1	232	0	1	1	0	1	13	0	1
1	1	3	0	0-60	0	0	0	0	1	0	0	0	0	0	0	0	0	0	0	0	0	0	0	0	0	33	0	1	99	0	1	36.7222	0	1	80	0	1	2.61	0	1	267	0	1	1.1	0	1	11	0	1
1	1	9	0	0-60	2	0	0	0	1	0	0	0	0	0	0	1	1	1	0	0	0	0	0	0	0	50	0	1	92	1	1	38.3333	1	1	76.6667	0	1	0.36	0	1	286	0	1	1.1	0	1	10	0	1
1	1	4	0	>60	1	0	0	0	0	1	0	1	0	1	0	0	1	0	0	0	0	0	0	0	0	61	1	1	98	0	1	37.2222	0	1	98.6667	0	0	0	0	1	197	0	1	1.1	0	1	11	0	1
1	1	10	1	0-60	5	1	0	0	0	0	1	0	0	0	0	0	0	0	0	0	0	0	0	0	0	60	0	1	79	1	1	36.8889	0	1	77.3333	0	1	2.59	0	1	213	0	1	1.2	0	0	0	0	1
1	1	12	1	>70	5	1	0	0	0	0	0	0	1	0	0	0	0	0	0	0	0	0	0	0	0	79	2	1	95	0	1	36.5	0	1	91	0	1	20	1	1	150	0	1	1.4	1	1	10	0	1
1	1	10	0	0-60	2	1	0	0	0	0	1	0	1	0	0	0	0	0	0	0	0	0	0	0	0	58	0	1	100	0	1	36.7778	0	1	98.3333	0	1	0.45	0	1	225	0	1	8.6	0	1	32	1	1
1	1	2	0	0-60	2	0	0	0	1	0	1	0	0	0	0	0	0	0	0	0	0	0	0	0	0	44	0	0	0	1	1	-17.7778	0	1	105.667	0	0	0	0	1	269	0	0	0	0	1	4.999	0	1
1	1	1	0	0-60	3	1	0	0	0	0	1	0	1	1	0	0	0	1	0	0	0	0	0	0	0	27	0	1	95	0	1	39.0556	1	1	85	0	1	9.06	1	1	1	2	1	1.2	1	1	15	0	1
1	1	13	0	>80	7	1	0	0	0	0	0	0	0	0	0	0	0	0	0	0	0	0	0	0	0	85	3	1	98	0	1	36.4444	0	1	100.667	0	1	9.38	1	1	324	0	1	1.1	1	1	144	1	1
1	1	4	0	0-60	3	0	1	0	0	0	1	1	0	0	1	0	0	1	0	0	0	0	0	0	0	54	0	1	84	1	1	38.2222	1	1	93	0	1	1.83	0	1	192	0	1	1.2	0	1	15	0	1
1	1	8	0	0-60	3	0	0	0	0	0	1	0	0	0	0	0	0	0	0	0	0	0	0	0	0	59	0	1	97	0	1	36.5556	0	1	91.3333	0	1	3.22	1	1	356	0	1	1.1	1	1	52	1	1
1	1	9	0	>80	5	0	0	0	1	0	0	0	0	0	0	0	0	0	0	0	0	0	0	0	0	91	3	1	96	0	1	36.5556	0	1	80	0	1	0.79	0	1	312	0	1	1.3	0	1	39	1	1
1	0	0	0	0-60	4	0	0	0	1	1	1	1	1	1	0	0	1	1	0	0	0	0	0	0	0	31	0	1	40	1	1	36.7778	0	1	93.3333	0	1	0.72	0	1	223	0	1	1.3	0	1	7	0	1
1	1	7	0	0-60	1	0	0	0	1	0	1	0	0	0	0	0	0	0	0	0	0	0	0	0	0	34	0	0	0	1	0	0	0	0	0	0	1	0.34	0	0	0	0	0	0	0	0	0	0	0
1	1	3	1	>60	4	0	0	0	1	0	0	0	1	0	0	0	0	0	1	1	0	0	0	1	0	65	1	1	50	1	1	37.1111	0	1	93.6667	0	1	2.85	0	1	264	0	1	1.1	0	1	27	0	1
1	0	0	0	>60	6	0	1	0	1	0	0	1	0	0	0	0	0	0	1	1	0	0	0	0	0	62	1	1	97	0	1	36	0	1	94.6667	0	1	3.83	1	1	235	0	1	1.7	1	1	118	1	1
1	1	7	0	0-60	3	1	0	0	0	0	0	0	0	0	0	0	0	0	0	0	0	0	0	0	0	51	0	1	93	1	1	38.0556	1	1	73.6667	0	1	2.13	0	1	190	0	1	1.2	0	1	9	0	1
1	1	8	1	>80	9	0	0	0	1	0	1	0	0	0	0	0	0	0	0	0	0	0	0	0	0	90	3	1	99	0	1	36.3889	0	1	35	1	1	20	1	1	145	1	1	1.1	1	1	58	1	1
1	1	3	0	0-60	2	1	0	0	0	0	0	1	0	1	0	0	0	1	0	0	0	0	0	0	0	60	0	1	98	0	1	36.6667	0	1	106.667	0	0	0	0	1	228	0	1	1.2	0	1	23	0	1
1	1	8	0	>70	2	0	0	0	1	0	0	0	0	0	0	0	0	0	0	0	0	0	0	0	0	76	2	1	97	0	1	36.6111	0	1	88	0	1	1.94	0	1	345	0	1	1	0	1	31	1	1
1	1	6	0	>60	5	0	0	0	1	1	0	1	1	0	0	0	1	1	0	0	0	0	0	0	0	62	1	1	92	1	1	37.5	0	1	87.3333	0	1	1.27	0	1	82	2	1	1.1	0	1	12	0	1
1	1	13	0	>60	2	0	0	0	0	0	0	0	0	0	0	0	0	0	0	0	0	0	0	0	0	64	1	1	97	0	1	36.8889	0	1	74.3333	0	1	2.06	0	1	163	0	1	1.1	0	1	9	0	1
1	1	20	1	0-60	4	0	0	0	1	0	1	0	0	0	0	0	0	0	0	0	0	0	0	0	0	60	0	1	94	0	1	36.8333	0	1	60.6667	1	1	1.71	0	1	178	0	1	1.2	0	1	53	1	1
1	1	9	1	>80	7	0	0	0	1	0	0	0	0	0	0	0	0	0	0	0	0	0	0	0	0	81	3	1	84	1	1	36.5	0	1	96.3333	0	1	2.99	0	1	117	1	1	2.3	0	1	54	1	1
1	1	2	0	>60	2	0	0	0	1	0	0	0	0	0	0	0	0	0	0	0	0	0	0	0	0	66	1	1	95	0	1	37.1111	0	1	104	0	1	2.38	0	1	334	0	1	1	0	1	14	0	1
1	1	3	0	>60	1	0	1	0	0	0	1	0	0	0	0	0	0	0	0	0	0	0	0	0	0	67	1	1	96	0	1	36.8333	0	1	80.3333	0	1	0.98	0	1	306	0	1	1	0	1	16	0	1
1	1	5	1	>60	3	0	1	0	0	0	0	0	0	0	0	0	0	0	1	1	0	0	0	1	0	67	1	1	96	0	1	36.6111	0	1	43.3333	1	0	0	0	1	327	0	1	1.6	0	1	23	0	1
1	1	1	0	>60	1	1	0	0	0	0	1	1	1	0	0	0	0	0	0	0	0	0	0	0	0	68	1	1	98	0	1	37.4444	0	1	70.6667	0	1	0.26999	0	1	238	0	1	0.9	0	1	10	0	1
1	1	4	0	0-60	1	0	1	0	0	0	0	0	0	0	0	0	0	0	1	1	0	0	0	0	0	60	0	0	0	1	0	0	0	0	0	0	1	1.18	0	1	195	0	1	1	0	1	18	0	1
1	1	10	0	0-60	3	1	0	0	0	0	0	0	0	0	0	0	0	0	0	0	0	0	0	0	0	35	0	1	93	1	1	37.8333	0	1	76	0	1	4.4	1	1	346	0	1	1	1	1	8	0	1
1	1	12	0	0-60	3	0	1	0	0	0	0	0	0	0	0	0	0	0	0	0	0	0	0	0	0	42	0	1	89	1	1	38.7778	1	1	95.6667	0	0	0	0	1	277	0	0	0	0	1	11	0	1
1	0	0	0	0-60	1	1	0	0	0	0	0	0	0	0	0	0	0	0	0	0	0	0	0	0	0	52	0	1	98	0	1	38.7222	1	1	69.6667	0	1	1.41	0	1	202	0	1	0.9	0	1	17	0	1
1	1	3	0	>70	2	1	0	0	0	0	0	0	0	0	0	1	1	1	0	0	0	0	0	0	0	74	2	1	94	0	1	37.1667	0	1	70.3333	0	1	1.74	0	1	259	0	1	1.2	0	1	12	0	1
1	1	1	1	>70	5	0	0	0	1	0	0	0	0	0	0	0	0	0	0	0	0	0	0	0	0	71	2	1	60	1	1	36.4444	0	1	68.3333	0	0	0	0	1	352	0	1	1.2	0	1	19	0	1
1	1	3	1	>60	7	0	0	0	1	0	1	0	0	0	0	0	0	0	0	0	0	0	0	0	0	64	1	1	27	1	1	38.0556	1	1	86.6667	0	1	1.77	0	1	280	0	1	1.3	0	0	0	0	1
1	1	2	0	>70	3	0	0	0	0	0	0	0	1	0	0	0	0	0	0	0	0	0	0	0	0	73	2	1	96	0	1	37.7778	0	1	96	0	1	0.83	0	1	264	0	1	1	0	1	8	0	1
1	1	5	0	0-60	2	1	0	0	0	0	0	0	1	0	0	0	0	0	0	0	0	0	0	0	0	60	0	1	96	0	1	39.4444	1	1	93.6667	0	0	0	0	1	165	0	1	1	0	1	22	0	1
1	1	2	0	>70	2	1	0	0	0	0	1	0	0	0	0	0	0	0	0	0	0	0	0	0	0	76	2	1	100	0	1	37.9444	0	1	72	0	0	0	0	1	190	0	1	1	0	1	32	1	1
1	1	2	0	0-60	2	1	0	0	0	0	0	0	0	0	0	0	0	0	0	0	0	0	0	0	0	49	0	1	91	1	1	37.4444	0	1	93.6667	0	1	0.91	0	1	277	0	1	1.1	0	1	16	0	1
1	1	19	0	0-60	2	0	0	0	0	0	0	0	0	0	0	0	0	0	0	0	0	0	0	0	0	54	0	1	100	0	1	36.7778	0	1	95.3333	0	1	8.11	1	1	301	0	1	1.6	1	1	24	0	1
1	1	6	0	>70	4	0	0	0	1	0	0	0	0	0	0	0	0	0	0	0	0	0	0	0	0	76	2	1	98	0	1	36.5	0	1	100.333	0	1	2.7	0	1	230	0	1	1.2	0	1	80	1	1
1	1	4	0	>70	2	0	0	0	1	0	0	0	0	0	0	0	0	0	0	0	0	0	0	0	0	75	2	1	95	0	1	37.0556	0	1	88	0	1	0.78	0	1	150	0	1	1	0	1	23	0	1
1	1	1	0	>80	6	0	0	0	1	0	1	0	0	1	0	0	0	0	0	0	0	0	0	0	0	89	3	1	99	0	1	36.2222	0	1	65.6667	0	1	0.98	0	1	736	0	1	1.3	0	1	123	1	1
1	1	4	1	0-60	1	0	0	0	1	0	0	0	0	0	0	0	0	0	1	1	0	0	0	1	0	59	0	1	98	0	1	37.3889	0	1	79.3333	0	1	0.81	0	1	201	0	1	1	0	0	0	0	1
1	1	9	0	>60	4	1	0	0	0	0	0	0	0	0	1	0	0	0	0	0	0	0	0	0	0	64	1	1	98	0	1	37.8333	0	1	95	0	1	1.97	0	1	57	2	1	1.1	0	1	13	0	1
1	1	12	0	>70	7	0	1	0	0	0	0	0	0	0	0	0	0	0	0	0	0	0	0	0	0	72	2	1	98	0	1	38.9444	1	1	92.6667	0	1	2.11	0	1	77	2	1	1.1	0	1	49	1	1
1	1	5	1	>80	3	0	1	0	0	0	0	0	1	0	0	0	0	0	0	0	0	0	0	0	0	93	3	1	96	0	1	36.7222	0	1	78	0	1	0.82	0	1	158	0	1	1.1	0	1	15	0	1
1	1	6	0	0-60	1	0	0	0	1	0	0	0	0	0	0	0	0	0	0	0	0	0	0	0	0	41	0	1	95	0	1	37.3889	0	1	98.3333	0	1	0.62	0	1	172	0	1	0.9	0	1	21	0	1
1	1	31	0	>60	6	1	0	0	0	0	0	0	0	0	0	0	0	0	0	0	0	0	0	0	0	66	1	1	97	0	1	37.8889	0	1	98.6667	0	1	0.88	0	1	108	1	1	1.4	0	1	133	1	1
1	1	2	0	>60	5	0	0	0	0	0	1	0	0	0	0	0	0	0	0	0	0	0	0	0	0	65	1	1	93	1	1	35.5556	0	1	91.3333	0	1	2.25	0	1	89	2	0	0	0	1	16	0	1
1	1	8	0	0-60	2	0	0	0	0	0	0	0	0	0	0	0	0	0	0	0	0	0	0	0	0	60	0	1	97	0	1	36.3333	0	1	94.3333	0	1	8.86	1	1	318	0	1	2	1	1	39	1	1
1	1	22	0	0-60	2	1	0	0	0	0	0	0	0	0	0	0	0	0	0	0	0	0	0	0	0	58	0	1	98	0	1	33.3333	0	1	93	0	1	1.95	0	1	332	0	1	1.3	0	0	0	0	1
1	1	10	0	>70	5	1	0	0	0	1	1	1	1	0	0	0	1	1	0	0	0	0	0	0	0	75	2	1	91	1	1	37.1667	0	1	89	0	1	1.34	0	1	268	0	1	1.1	0	1	35	1	1
1	1	17	0	>60	4	0	1	0	0	0	0	0	0	0	0	0	0	0	0	0	0	0	0	0	0	67	1	1	84	1	1	36.6667	0	1	76	0	1	10.03	1	1	365	0	1	1	1	1	17	0	1
1	1	2	0	0-60	2	1	0	0	0	0	0	0	0	0	1	0	0	0	0	0	0	0	0	0	0	56	0	0	0	1	0	0	0	0	0	0	1	1.67	0	1	289	0	1	1.1	0	1	32	1	1
1	1	12	1	0-60	5	0	0	0	0	0	1	1	1	0	0	1	1	1	0	0	0	0	0	0	0	56	0	1	55	1	1	38.7778	1	1	55.3333	1	1	20	1	1	360	0	1	1.2	1	0	0	0	1
1	1	16	0	0-60	2	1	0	0	0	0	0	0	0	0	0	0	0	0	0	0	0	0	0	0	0	59	0	1	86	1	1	38.9444	1	1	95.6667	0	1	1.89	0	1	185	0	1	1.1	0	0	0	0	1
1	1	1	0	>80	5	0	0	0	1	0	0	0	0	0	1	1	1	1	1	1	0	0	1	0	0	92	3	1	96	0	1	37.0556	0	1	85.3333	0	1	0.26999	0	1	212	0	1	1.2	0	1	23	0	1
1	1	12	0	>60	4	0	0	0	1	0	0	0	0	0	0	0	0	0	0	0	0	0	0	0	0	61	1	1	86	1	1	37.1667	0	1	83	0	1	0.92	0	1	110	1	1	0.9	0	1	14	0	1
1	1	13	1	>80	11	0	0	0	0	0	0	0	0	0	0	0	0	0	0	0	0	0	0	0	0	82	3	1	93	1	1	37.2778	0	1	44.3333	1	1	20	1	1	133	1	1	3.5	1	0	0	0	1
1	1	6	0	0-60	1	1	0	0	0	0	0	0	0	0	0	0	0	0	0	0	0	0	0	0	0	37	0	1	97	0	1	39.3889	1	1	82.3333	0	1	1.32	0	1	291	0	1	1.1	0	1	4.999	0	1
1	1	2	0	0-60	0	0	0	0	1	0	0	0	1	1	0	1	1	1	0	0	0	0	0	0	0	28	0	1	96	0	1	36.8333	0	1	87.3333	0	1	0.62	0	1	293	0	1	1.1	0	1	4.999	0	1
1	1	9	0	>80	5	1	0	0	0	0	0	0	0	0	0	0	0	1	0	0	0	0	0	0	0	98	3	1	95	0	1	35.4444	0	1	78	0	1	0.49	0	1	407	0	1	1.2	0	1	142	1	1
1	1	7	0	0-60	2	0	0	0	0	0	0	0	0	0	0	0	0	0	0	0	0	0	0	0	0	26	0	1	88	1	1	37.1111	0	1	87	0	1	0.73	0	1	351	0	1	1.1	0	1	10	0	1
1	1	3	0	>70	2	0	1	0	0	0	0	0	0	0	0	0	0	0	0	0	0	0	0	0	0	75	2	1	98	0	1	36.6111	0	1	89.3333	0	1	1.97	0	1	233	0	1	1	0	1	52	1	1
1	1	8	0	>70	5	1	0	0	0	0	0	0	0	0	0	0	0	0	0	0	0	0	0	0	0	75	2	1	94	0	1	37.7778	0	1	97.3333	0	1	0.79	0	1	262	0	1	1.7	0	0	0	0	1
1	1	25	1	>60	4	0	0	0	1	0	1	1	0	1	1	0	0	1	0	0	0	0	0	0	0	68	1	1	81	1	1	37.3889	0	0	0	0	1	2.77	0	1	429	0	1	1.1	0	0	0	0	1
1	1	6	0	>70	3	1	0	0	0	0	0	0	0	0	0	0	0	0	0	0	0	0	0	0	0	73	2	1	94	0	1	37.0556	0	1	82.3333	0	0	0	0	1	169	0	0	0	0	1	20	0	1
1	1	12	0	0-60	1	1	0	0	0	0	0	0	0	0	0	0	0	0	0	0	0	0	0	0	0	23	0	1	99	0	1	36.7222	0	1	99	0	1	1.56	0	1	249	0	1	1	0	0	0	0	1
1	1	8	0	0-60	3	0	0	0	0	0	0	1	1	1	0	0	0	0	0	0	0	0	0	0	0	58	0	1	90	1	1	37.1667	0	1	94	0	1	2.04	0	1	161	0	1	1.1	0	1	17	0	1
1	1	2	0	>60	7	0	0	0	1	0	0	1	0	0	1	1	1	1	1	1	0	0	0	0	0	62	1	1	92	1	1	37.9444	0	1	95	0	1	2.33	0	1	71	2	1	1.1	0	1	15	0	1
1	0	0	0	0-60	2	0	0	0	1	0	1	0	0	0	0	0	0	0	0	0	0	0	0	0	0	56	0	1	100	0	1	37.8889	0	1	85.3333	0	1	2.34	0	1	1226	0	1	1.3	0	1	37	1	1
1	1	4	0	>80	7	0	0	0	1	0	0	0	0	0	0	0	0	0	0	0	0	0	0	0	0	82	3	1	95	0	1	36.6667	0	1	75.6667	0	1	3.15	1	1	276	0	1	1.9	1	1	18	0	1
1	1	1	0	0-60	2	0	0	0	1	0	0	0	0	0	0	0	0	0	0	0	0	0	0	0	0	23	0	1	99	0	1	36.3889	0	1	82.6667	0	1	0.51	0	1	266	0	1	1.7	0	1	11	0	1
1	1	4	0	>80	7	0	0	0	1	0	0	0	0	0	0	0	0	0	0	0	0	0	0	0	0	92	3	1	92	1	1	35.7778	0	1	99.3333	0	1	2.04	0	1	212	0	1	1.1	0	1	64	1	1
1	1	5	0	0-60	0	1	0	0	0	0	0	0	0	0	0	0	0	0	0	0	0	0	0	0	0	54	0	1	99	0	1	36.7222	0	1	90	0	1	0.34	0	1	299	0	1	1.2	0	1	25	0	1
1	1	11	0	>70	4	0	0	0	1	0	0	0	0	0	0	0	0	0	0	0	0	0	0	0	0	79	2	1	96	0	1	38.1111	1	1	86	0	0	0	0	1	158	0	1	1.1	0	1	27	0	1
1	0	0	0	>70	4	0	1	0	0	0	0	0	0	0	0	0	0	0	0	0	0	0	0	0	0	73	2	1	91	1	1	36.6111	0	1	90.6667	0	1	2.8	0	1	241	0	1	1.1	0	1	15	0	1
1	1	12	0	0-60	0	1	0	0	0	0	0	0	0	0	0	0	0	1	0	0	0	0	0	0	0	60	0	1	95	0	1	37.5	0	1	77	0	1	0.36	0	1	291	0	0	0	0	1	13	0	1
1	1	5	0	>80	5	1	0	0	0	1	1	1	1	0	1	0	1	1	1	1	0	0	0	0	0	87	3	1	98	0	1	39.3333	1	1	83.3333	0	1	1.68	0	1	131	1	1	1	0	1	33	1	1
1	1	4	1	>70	3	1	0	0	0	0	0	0	0	0	0	0	0	0	0	0	0	0	0	0	0	73	2	1	98	0	1	36.9444	0	1	94.6667	0	0	0	0	1	136	1	1	1.2	0	1	30	0	1
1	1	7	0	>60	3	1	0	0	0	0	0	0	0	0	0	0	0	0	0	0	0	0	0	0	0	69	1	1	99	0	1	38.1667	1	1	92	0	1	2.12	0	1	135	1	1	1.1	0	1	37	1	1
1	1	12	0	0-60	4	0	0	0	1	0	0	0	0	1	0	0	0	0	0	0	0	0	0	0	0	53	0	1	99	0	1	39.7222	1	1	86	0	1	2.52	0	1	111	1	1	1.1	0	1	39	1	1
1	0	0	0	>60	3	1	0	0	0	0	1	0	0	0	0	0	0	0	1	1	0	0	1	0	0	65	1	0	0	1	0	0	0	0	0	0	0	0	0	0	0	0	1	1.4	0	0	0	0	1
1	1	2	0	>70	5	0	0	0	1	0	0	0	0	0	0	0	0	0	0	0	0	0	0	0	0	78	2	1	89	1	1	37.9444	0	1	93	0	1	1.62	0	1	220	0	1	1.1	0	1	16	0	1
1	1	7	0	>60	3	0	0	0	1	0	0	0	0	0	0	0	0	0	0	0	0	0	0	0	0	61	1	1	88	1	1	37.6667	0	1	94	0	1	0.55	0	1	261	0	1	1.1	0	1	8	0	1
1	1	9	0	>70	4	0	0	0	1	0	0	0	0	0	0	0	0	1	0	0	0	0	0	0	0	77	2	1	96	0	1	37.6111	0	1	92.3333	0	1	1.15	0	1	188	0	1	1.1	0	1	9	0	1
1	1	25	1	>80	5	1	0	0	0	0	1	1	0	0	0	0	0	1	0	0	0	0	0	0	0	86	3	1	95	0	1	36.7778	0	1	55	1	1	1.1	0	1	369	0	1	0.9	0	1	46	1	1
1	1	12	0	>80	5	0	0	1	0	0	0	0	0	0	0	0	0	0	0	0	0	0	0	0	0	86	3	1	95	0	1	37.0556	0	1	107.333	0	1	0.58	0	1	222	0	1	1	0	1	78	1	1
1	0	0	0	>80	8	1	0	0	0	0	0	0	0	0	0	0	0	0	1	1	0	0	0	0	0	99	3	1	90	1	1	33.8889	0	1	85	0	1	20	1	1	160	0	1	1.6	1	1	48	1	1
1	1	6	0	0-60	3	1	0	0	0	0	0	0	0	0	0	0	0	0	0	0	0	0	0	0	0	55	0	1	93	1	1	37.2222	0	1	91	0	1	1.4	0	1	219	0	1	1.1	0	1	29	0	1
1	1	2	1	0-60	2	0	0	0	0	0	0	1	0	1	0	0	0	1	0	0	0	0	0	0	0	57	0	1	100	0	1	35.6111	0	1	71	0	0	0	0	1	249	0	1	2.4	0	1	23	0	1
1	1	14	1	>60	4	0	0	0	1	0	0	0	0	0	0	0	0	0	0	0	0	0	0	0	0	67	1	1	92	1	1	37.0556	0	1	61.3333	0	1	0.96	0	1	184	0	1	1	0	1	29	0	1
1	1	22	0	>70	2	1	0	0	0	0	0	0	0	0	0	0	0	0	0	0	0	0	0	0	0	71	2	1	97	0	1	36.7778	0	1	79	0	1	1.74	0	1	219	0	1	0.9	0	0	0	0	1
1	1	3	0	>70	6	0	0	0	0	0	1	0	0	0	0	0	0	0	0	0	0	0	0	0	0	72	2	1	89	1	1	36.5556	0	1	109.667	0	1	4.55	1	1	105	1	1	1.1	1	1	22	0	1
1	1	6	0	>60	2	0	1	0	0	0	0	0	0	1	0	0	0	1	0	0	0	0	0	0	0	65	1	1	98	0	1	36.9444	0	1	72.3333	0	1	1.01	0	1	151	0	1	1.9	0	1	20	0	1
1	1	3	0	>70	5	1	0	0	0	0	1	0	1	0	1	0	0	0	0	0	0	0	0	0	0	78	2	0	0	1	0	0	0	0	0	0	1	2.16	0	1	279	0	1	3.4	0	1	35	1	1
1	1	2	1	>80	9	1	0	0	0	0	0	0	0	0	0	0	0	0	0	0	0	0	0	0	0	83	3	1	77	1	1	36.3333	0	1	73	0	1	20	1	1	170	0	1	1.5	1	1	149	1	1
1	1	3	0	>60	2	0	0	0	1	0	0	0	0	0	0	0	0	0	0	0	0	0	0	0	0	70	1	1	97	0	1	36.6667	0	1	89	0	1	3.96	1	1	303	0	1	1	1	1	6	0	1
1	1	9	1	>80	4	0	0	0	1	0	0	1	0	0	0	0	0	1	0	0	0	0	0	0	0	92	3	1	98	0	1	38.1111	1	1	42	1	1	1.88	0	1	186	0	1	1.1	0	1	16	0	1
1	1	6	0	0-60	1	0	0	0	0	0	0	0	0	0	0	0	0	0	0	0	0	0	0	0	0	39	0	1	93	1	1	37.3333	0	1	82.6667	0	0	0	0	1	161	0	0	0	0	1	12	0	1
1	1	8	0	0-60	3	0	1	0	0	0	0	1	0	0	0	1	1	0	0	0	0	0	0	0	0	38	0	1	76	1	1	36.9444	0	1	87	0	1	2.2	0	1	235	0	1	1.1	0	1	11	0	1
1	1	7	0	>70	6	1	0	0	0	0	1	1	0	0	1	0	0	1	0	0	0	0	0	0	0	78	2	1	81	1	1	37.5	0	1	87.3333	0	1	3.05	1	1	452	0	1	1.2	1	1	28	0	1
1	1	7	1	0-60	3	1	0	0	0	1	0	0	0	0	0	0	1	0	0	0	0	0	0	0	0	54	0	1	94	0	1	36.9444	0	1	70	0	0	0	0	1	704	0	1	1.2	0	1	76	1	1
1	1	4	1	>70	4	0	0	1	0	1	0	0	0	1	0	0	1	0	1	1	0	0	0	1	0	75	2	1	100	0	1	37.2778	0	1	96.6667	0	0	0	0	1	310	0	1	1.1	0	1	60	1	1
1	1	4	0	>80	5	1	0	0	0	0	0	0	0	0	0	0	0	0	0	0	0	0	0	0	0	89	3	1	97	0	1	37.3889	0	1	88.3333	0	1	10.74	1	1	287	0	1	1.1	1	1	42	1	1
1	1	2	0	0-60	2	1	0	0	0	0	1	0	1	0	0	0	0	0	0	0	0	0	0	0	0	60	0	1	95	0	1	37.2222	0	1	75.3333	0	1	1.25	0	1	198	0	1	1	0	1	26	0	1
1	1	4	0	>80	4	0	0	0	1	0	0	0	0	0	0	0	0	0	0	0	0	0	0	0	0	84	3	1	94	0	1	36.6667	0	1	94.6667	0	1	1.26	0	1	188	0	1	1	0	1	50	1	1
1	1	5	0	>70	3	0	0	0	1	0	1	0	0	0	0	1	1	1	1	1	0	0	0	1	0	78	2	1	98	0	1	36.3333	0	1	85.6667	0	1	0.92	0	1	213	0	1	1.2	0	1	8	0	1
1	1	4	0	0-60	4	1	0	0	0	0	0	0	0	0	0	0	0	0	0	0	0	0	0	0	0	56	0	1	96	0	1	36.1111	0	1	94.6667	0	1	5	1	1	301	0	1	1.5	1	1	13	0	1
1	1	5	0	>60	2	0	1	0	0	0	0	0	0	0	0	0	0	0	0	0	0	0	0	0	0	70	1	1	92	1	1	37.0556	0	1	102.333	0	0	0	0	1	201	0	1	1	0	1	19	0	1
1	1	4	0	0-60	3	1	0	0	0	0	0	0	0	0	0	1	1	1	0	0	0	0	0	0	0	38	0	1	97	0	1	37.3333	0	1	99.6667	0	1	0.92	0	1	156	0	1	1	0	1	39	1	1
1	1	1	1	0-60	1	0	0	0	1	0	0	0	0	0	0	0	0	1	0	0	0	0	0	0	0	56	0	0	96	0	0	36.7778	0	1	105.333	0	0	0	0	0	310	0	0	0	0	1	56	1	1
1	1	10	0	>60	3	1	0	0	0	0	0	0	0	0	0	0	0	0	0	0	0	0	0	0	0	65	1	1	98	0	1	37.5556	0	1	104.667	0	1	6.12	1	1	172	0	1	1.1	1	1	9	0	1
1	1	5	1	>70	7	1	0	0	0	0	1	0	0	0	0	0	0	0	0	0	0	0	0	0	0	77	2	1	69	1	1	36.7222	0	1	69.3333	0	1	7.96	1	1	150	0	1	1.2	1	1	90	1	1
1	1	8	1	>70	6	0	0	0	1	0	0	0	0	0	0	0	0	0	0	0	0	0	0	0	0	80	2	1	89	1	1	37.7222	0	0	0	0	1	3.66	1	1	230	0	1	1	1	1	26	0	1
1	1	2	0	0-60	0	1	0	0	0	0	1	0	0	0	0	0	0	0	0	0	0	0	0	0	0	35	0	1	97	0	1	36.8889	0	1	79.3333	0	1	2.02	0	1	275	0	1	0.9	0	1	9	0	1
1	1	1	0	0-60	1	0	0	0	0	0	0	0	0	0	0	0	0	0	0	0	0	0	0	0	0	40	0	1	85	1	1	37.0556	0	1	91.3333	0	1	0.36	0	1	253	0	1	1	0	1	8	0	1
1	1	12	1	>70	8	1	0	0	0	0	0	1	1	0	0	0	0	1	1	1	0	0	0	1	0	71	2	1	84	1	1	36.5556	0	1	51.6667	1	1	3.91	1	1	301	0	1	1.1	1	1	36	1	1
1	1	2	0	>60	4	0	0	0	1	0	1	0	1	0	0	1	1	1	1	1	0	0	0	1	0	67	1	1	92	1	1	37	0	1	95.6667	0	1	1.89	0	1	210	0	1	1.1	0	1	27	0	1
1	1	4	1	0-60	2	0	0	0	1	0	0	0	0	0	0	0	0	0	0	0	0	0	0	0	0	60	0	1	96	0	1	38.3333	1	1	59.3333	1	0	0	0	1	220	0	1	1.1	0	1	20	0	1
1	1	5	0	>80	6	1	0	0	0	0	0	0	0	0	0	0	0	0	0	0	0	0	0	0	0	81	3	1	93	1	1	36.5556	0	1	89.6667	0	1	1.73	0	1	173	0	1	1.2	0	1	37	1	1
1	1	5	0	0-60	3	0	0	0	1	1	0	0	0	1	0	0	1	0	0	0	0	0	0	0	0	47	0	1	88	1	1	37.5	0	1	96.3333	0	1	0.91	0	1	209	0	1	1.2	0	1	19	0	1
1	1	10	0	>60	3	0	0	0	1	0	0	0	0	0	0	0	0	0	0	0	0	0	0	0	0	61	1	1	91	1	1	37.2222	0	1	83.6667	0	1	2.33	0	1	112	1	1	1	0	1	18	0	1
1	1	10	0	>60	2	0	1	0	0	0	1	0	0	0	0	0	0	0	0	0	0	0	0	0	0	65	1	0	0	1	1	-17.7778	0	1	100.333	0	0	0	0	0	0	0	0	0	0	0	0	0	0
1	1	4	0	>70	5	0	0	0	0	0	1	0	0	0	0	0	1	1	0	0	0	0	0	0	0	74	2	1	97	0	1	36.3333	0	1	90	0	1	0.58	0	1	251	0	1	1	0	1	38	1	1
1	1	10	1	>70	7	1	0	0	0	0	0	0	0	0	0	0	0	0	0	0	0	0	0	0	0	74	2	1	100	0	1	38.8333	1	1	42	1	0	0	0	1	104	1	1	1.1	0	1	35	1	1
1	1	3	0	0-60	2	1	0	0	0	0	1	0	0	0	0	0	0	0	0	0	0	0	0	0	0	23	0	1	86	1	1	37.7222	0	1	100	0	1	1.2	0	1	274	0	1	1	0	1	9	0	1
1	1	3	0	0-60	0	1	0	0	0	0	0	0	0	0	0	0	0	1	0	0	0	0	0	0	0	51	0	1	100	0	1	36.8333	0	1	96	0	1	0.83	0	1	151	0	1	1.1	0	1	6	0	1
1	1	24	1	>70	7	0	0	0	0	0	1	1	1	0	0	0	0	0	0	0	0	0	0	0	0	77	2	1	44	1	1	37.1111	0	1	71.3333	0	1	20	1	1	318	0	1	1	1	0	0	0	1
1	1	5	0	>80	5	0	0	0	0	0	0	0	0	1	0	1	1	0	1	1	0	0	1	0	0	81	3	1	98	0	1	36.6667	0	1	87.6667	0	0	0	0	1	436	0	1	1.1	0	1	98	1	1
1	1	18	1	0-60	6	0	0	0	1	0	0	1	0	0	0	0	0	0	0	0	0	0	0	0	0	56	0	0	0	1	1	-17.7778	0	1	21.3333	1	0	0	0	1	237	0	0	0	0	1	79	1	1
1	1	7	0	>70	7	1	0	0	0	0	1	0	1	0	0	0	0	0	0	0	0	0	0	0	0	77	2	1	96	0	1	38.0556	1	1	107	0	1	2.25	0	1	173	0	1	1.4	0	1	45	1	1
1	1	1	0	0-60	1	0	0	0	1	0	0	0	0	0	0	0	0	0	0	0	0	0	0	0	0	27	0	1	98	0	1	37.5	0	1	88.3333	0	0	0	0	1	360	0	1	1.1	0	1	9	0	1
1	1	2	0	>70	5	0	0	0	1	0	1	1	1	0	0	0	0	1	1	0	0	0	0	0	1	72	2	1	100	0	1	36.4444	0	1	88.6667	0	0	0	0	1	91	2	0	0	0	1	16	0	1
1	1	2	1	>80	6	1	0	0	0	0	0	0	0	0	0	0	0	0	0	0	0	0	0	0	0	93	3	1	96	0	1	36.5	0	1	85.3333	0	0	0	0	1	119	1	1	1.6	0	1	67	1	1
1	1	11	0	>80	8	0	0	0	1	0	0	1	1	0	0	0	0	0	0	0	0	0	0	0	0	85	3	1	100	0	1	37.4444	0	1	75.6667	0	1	1.23	0	1	94	2	0	0	0	1	45	1	1
1	1	43	0	>60	5	0	0	0	0	0	0	0	0	0	0	0	0	0	1	1	0	0	0	0	0	63	1	1	90	1	1	37.8889	0	1	73.3333	0	1	2.55	0	1	104	1	1	1	0	1	36	1	1
1	1	14	1	>70	7	1	0	0	0	0	0	0	0	0	0	0	0	0	0	0	0	0	0	0	0	74	2	1	87	1	1	36.9444	0	1	93.6667	0	1	1.39	0	1	198	0	1	1.1	0	1	61	1	1
1	1	4	0	>70	2	0	0	0	1	0	0	0	1	0	0	0	0	0	1	1	0	0	0	1	0	75	2	1	100	0	1	36.8889	0	1	95.3333	0	0	0	0	1	565	0	1	1	0	1	11	0	1
1	1	2	0	0-60	1	1	0	0	0	0	0	0	0	0	0	0	0	0	0	0	0	0	0	0	0	46	0	1	94	0	1	38.7222	1	1	86.6667	0	1	0.97	0	1	199	0	1	1.1	0	1	11	0	1
1	1	1	0	0-60	1	1	0	0	0	0	1	0	0	0	0	0	0	0	0	0	0	0	0	0	0	28	0	0	0	1	0	0	0	0	0	0	1	1.05	0	0	0	0	0	0	0	0	0	0	0
1	1	1	0	>60	3	1	0	0	0	0	0	0	0	0	0	0	0	0	0	0	0	0	0	0	0	64	1	1	96	0	1	37.0556	0	1	103.667	0	1	0.89	0	1	219	0	1	1	0	1	6	0	1
1	1	3	0	>60	5	1	0	0	0	1	0	1	0	0	1	0	1	1	0	0	0	0	0	0	0	66	1	1	94	0	1	37.7778	0	1	76.6667	0	1	1.28	0	1	198	0	1	1.4	0	1	90	1	1
1	1	2	1	>70	5	1	0	0	0	0	0	0	0	0	0	0	0	0	0	0	0	0	0	0	0	80	2	1	98	0	1	37.7778	0	1	57.3333	1	0	0	0	1	176	0	1	1	0	1	92	1	1
1	0	0	0	0-60	0	0	0	0	0	0	0	0	0	0	0	0	0	0	0	0	0	0	0	0	0	57	0	1	100	0	1	35.7778	0	1	115.333	0	1	2.08	0	1	339	0	1	1.1	0	1	41	1	1
1	1	5	0	0-60	3	1	0	0	0	0	0	0	0	0	0	0	0	0	0	0	0	0	0	0	0	59	0	1	90	1	1	37	0	1	75.3333	0	0	0	0	1	275	0	1	1	0	1	18	0	1
1	1	9	0	>70	8	0	0	0	1	0	0	0	0	0	0	0	0	0	0	0	0	0	0	0	0	75	2	1	93	1	1	36.7778	0	1	86.3333	0	1	3.1	1	1	93	2	1	1.2	1	1	75	1	1
1	1	25	1	>70	8	1	0	0	0	0	0	0	0	0	0	0	0	0	1	0	0	0	0	0	1	77	2	1	94	0	1	37.6667	0	1	42.6667	1	1	20	1	1	250	0	1	1.3	1	0	0	0	1
1	1	6	1	>80	7	0	0	0	1	0	0	0	0	0	0	0	0	1	0	0	0	0	0	0	0	82	3	1	94	0	1	37.2778	0	1	68	0	0	0	0	1	143	1	1	1.5	0	1	18	0	1
1	1	3	1	0-60	5	0	0	0	0	0	0	0	1	0	1	0	0	0	0	0	0	0	0	0	0	56	0	1	90	1	1	39.2222	1	1	34.3333	1	1	20	1	1	212	0	1	1.1	1	1	6	0	1
1	1	9	1	>70	8	0	0	1	0	0	0	0	0	0	0	0	0	0	0	0	0	0	0	0	0	77	2	1	84	1	1	36.9444	0	1	70.3333	0	1	1.66	0	1	117	1	1	1.2	0	0	0	0	1
1	1	9	0	>70	6	0	1	0	0	0	0	0	0	0	0	0	0	0	0	0	0	0	0	0	0	74	2	1	88	1	1	36.7778	0	1	81.6667	0	1	1.5	0	1	92	2	1	1.1	0	1	17	0	1
1	1	2	0	>80	5	1	0	0	0	0	1	0	1	1	0	0	0	0	0	0	0	0	0	0	0	87	3	1	99	0	1	36.5556	0	1	104.333	0	1	6.83	1	1	114	1	1	1	1	1	19	0	1
1	1	8	0	>70	4	0	1	0	0	0	0	0	0	0	0	0	0	0	1	1	0	0	0	1	0	76	2	1	95	0	1	39.2778	1	1	62.3333	0	0	0	0	1	106	1	1	1.1	0	1	24	0	1
1	1	8	0	>70	5	1	0	0	0	0	0	0	0	0	0	0	0	0	0	0	0	0	0	0	0	76	2	1	100	0	1	36.5	0	1	95.3333	0	1	2.72	0	1	331	0	1	1.3	0	1	125	1	1
1	1	3	0	0-60	0	0	0	0	1	1	1	1	0	0	1	0	1	1	0	0	0	0	0	0	0	44	0	1	99	0	1	36.8333	0	1	88.3333	0	1	0.32	0	1	220	0	1	1	0	1	8	0	1
1	1	13	1	>80	6	0	1	0	0	0	0	0	0	0	0	0	0	0	0	0	0	0	0	0	0	82	3	1	92	1	1	36.7778	0	1	49	1	1	2.13	0	1	188	0	1	1	0	1	20	0	1
1	1	4	0	>60	4	1	0	0	0	0	0	0	1	0	0	0	0	0	0	0	0	0	0	0	0	61	1	1	88	1	1	37.7222	0	1	100.667	0	1	0.57	0	1	180	0	1	1.1	0	1	13	0	1
1	1	18	0	>80	5	0	0	0	0	0	0	0	0	0	0	1	1	0	0	0	0	0	0	0	0	81	3	1	89	1	1	37.5	0	1	92.3333	0	1	3.67	1	1	191	0	1	1.2	1	1	42	1	1
1	1	1	0	>80	4	0	1	0	0	0	0	0	0	0	0	0	0	0	0	0	0	0	0	0	0	86	3	1	97	0	1	36.7222	0	1	90.6667	0	1	0.96	0	1	264	0	1	0.9	0	1	14	0	1
1	1	34	0	>60	7	1	0	0	0	0	0	0	0	0	0	0	0	0	0	0	0	0	0	0	0	64	1	1	78	1	1	36.3889	0	1	91.3333	0	1	3.82	1	1	132	1	1	1.1	1	0	0	0	1
1	1	5	0	>70	3	1	0	0	0	0	0	1	0	0	1	0	0	0	0	0	0	0	0	0	0	79	2	1	94	0	1	39	1	1	84	0	0	0	0	1	182	0	1	1.1	0	1	26	0	1
1	1	3	1	>80	6	0	0	0	1	0	0	0	0	0	0	0	0	0	0	0	0	0	0	0	0	90	3	1	90	1	1	38.3333	1	0	0	0	1	7.29	1	1	248	0	1	1.1	1	1	19	0	1
1	1	16	1	>80	7	1	0	0	0	0	1	1	0	0	0	0	0	0	0	0	0	0	0	0	0	82	3	1	73	1	1	36.8333	0	1	70.3333	0	1	4.5	1	1	184	0	1	1.1	1	1	22	0	1
1	1	6	1	>60	7	0	0	0	1	0	0	0	0	0	0	0	0	1	0	0	0	0	0	0	0	69	1	1	86	1	1	39.1111	1	1	46.6667	1	1	0.75	0	1	96	2	1	1	0	1	13	0	1
1	1	7	1	>80	4	1	0	0	0	0	0	0	0	1	0	0	0	1	0	0	0	0	0	0	0	84	3	1	100	0	1	37.0556	0	1	98	0	0	0	0	1	256	0	1	1	0	1	30	0	1
1	1	8	0	0-60	2	0	0	0	0	0	0	0	0	0	0	0	0	0	0	0	0	0	0	0	0	35	0	1	96	0	1	37.2222	0	1	76	0	1	0.49	0	1	175	0	1	1.1	0	1	24	0	1
1	1	35	0	>70	3	1	0	0	0	1	0	1	0	0	0	0	1	0	1	1	0	0	0	1	0	71	2	0	0	1	0	0	0	0	0	0	0	0	0	0	0	0	0	0	0	0	0	0	0
1	1	12	1	>70	7	0	0	0	1	0	0	0	0	0	0	0	0	0	0	0	0	0	0	0	0	71	2	1	60	1	1	36.8333	0	1	26.6667	1	1	3.92	1	1	262	0	1	1	1	0	0	0	1
1	1	5	0	0-60	3	0	0	0	1	0	0	0	0	0	0	0	0	0	0	0	0	0	0	0	0	60	0	1	96	0	1	36.8333	0	1	106.667	0	1	1.42	0	1	159	0	1	1.4	0	1	22	0	1
1	0	0	0	0-60	0	1	0	0	0	0	0	0	0	0	0	0	0	0	0	0	0	0	0	0	0	23	0	1	99	0	1	36.9444	0	1	68	0	0	0	0	1	156	0	1	1	0	0	0	0	0
1	1	11	1	>60	3	1	0	0	0	0	0	0	0	0	0	0	0	0	0	0	0	0	0	0	0	69	1	1	99	0	1	39.5	1	1	83	0	1	12.74	1	1	182	0	1	1.1	1	1	27	0	1
1	1	4	0	>60	1	0	1	0	0	0	0	0	0	0	0	0	0	0	0	0	0	0	0	0	0	63	1	1	94	0	1	37	0	1	101	0	1	0.93	0	1	382	0	1	1.1	0	1	15	0	1
1	1	4	0	>60	3	0	0	0	1	0	0	0	0	0	0	0	0	0	0	0	0	0	0	0	0	63	1	1	94	0	1	37.1111	0	1	97.3333	0	1	1.14	0	1	218	0	1	1	0	1	39	1	1
1	1	3	1	>60	4	1	0	0	0	0	0	0	0	0	0	0	0	0	0	0	0	0	0	0	0	70	1	1	92	1	1	37.3889	0	1	83	0	0	0	0	1	145	1	1	1	0	1	13	0	1
1	1	1	0	>60	4	0	0	0	1	0	0	0	0	0	0	0	0	0	0	0	0	0	0	0	0	70	1	1	93	1	1	37.0556	0	1	91.3333	0	1	1.66	0	1	170	0	1	1	0	1	13	0	1
1	1	4	1	>80	5	0	0	0	1	0	0	1	0	0	1	0	0	1	0	0	0	0	0	0	0	82	3	1	52	1	1	38.1667	1	1	74	0	1	1.91	0	1	186	0	1	1.2	0	1	26	0	1
1	1	4	1	>60	3	1	0	0	0	0	0	0	0	0	0	1	1	1	0	0	0	0	0	0	0	63	1	1	88	1	1	38.7222	1	1	63	0	1	1.58	0	1	309	0	1	1	0	1	43	1	1
1	1	14	0	>70	7	0	0	0	1	0	1	1	1	1	0	1	1	1	1	1	0	0	0	1	0	73	2	1	95	0	1	36.9444	0	1	83.3333	0	1	3.22	1	1	324	0	1	1	1	1	41	1	1
1	1	31	1	>80	7	1	0	0	0	0	0	0	0	0	0	0	0	0	0	0	0	0	0	0	0	90	3	1	84	1	1	36.8333	0	1	89.6667	0	1	0.77	0	1	148	1	1	1	0	1	35	1	1
1	1	6	0	0-60	0	0	0	0	1	0	1	0	0	0	0	0	0	0	0	0	0	0	0	0	0	46	0	1	96	0	1	37.3889	0	1	100.667	0	1	1.04	0	1	488	0	1	1	0	1	4.999	0	1
1	1	8	0	>60	2	0	0	0	1	0	0	0	0	0	0	0	0	0	0	0	0	0	0	0	0	68	1	1	94	0	1	37.2222	0	1	82	0	1	1.75	0	1	263	0	1	1.1	0	0	0	0	1
1	1	6	1	>70	8	1	0	0	1	0	0	0	0	0	0	0	0	0	0	0	0	0	0	0	0	77	2	1	64	1	1	37.1111	0	1	75.3333	0	1	19.59	1	1	418	0	1	1.1	1	1	90	1	1
1	1	2	0	>70	3	0	1	0	0	0	0	0	0	0	0	0	0	0	0	0	0	0	0	0	0	71	2	1	100	0	1	36.8333	0	1	89.6667	0	0	0	0	1	108	1	1	1	0	1	13	0	1
1	1	6	1	>80	9	1	0	0	0	0	0	0	0	0	0	1	1	0	0	0	0	0	0	0	0	88	3	1	100	0	1	36.6111	0	1	78	0	1	5.73	1	1	365	0	1	2.2	1	0	0	0	1
1	1	25	1	>70	7	1	0	0	0	0	1	0	0	0	0	0	0	0	1	1	0	0	1	0	0	76	2	1	89	1	1	37.2222	0	1	122	0	1	8.01	1	1	110	1	1	1.1	1	0	0	0	1
1	1	3	0	>80	4	0	0	0	1	0	1	1	1	0	0	0	0	1	0	0	0	0	0	0	0	91	3	1	99	0	1	36.3333	0	1	85.3333	0	1	20	1	1	386	0	1	0.9	1	1	44	1	1
1	1	2	0	>60	3	1	0	0	0	0	0	0	0	0	0	0	0	0	0	0	0	0	0	0	0	61	1	1	95	0	1	37.0556	0	1	74.6667	0	1	0.38	0	1	219	0	1	1	0	1	31	1	1
1	0	0	0	0-60	0	1	0	0	0	0	1	1	1	0	0	1	1	1	0	0	0	0	0	0	0	55	0	1	96	0	1	36.6111	0	1	84.3333	0	1	2.99	0	1	256	0	1	1.2	0	1	39	1	1
1	1	6	0	>60	2	0	1	0	0	0	0	1	0	0	0	1	1	1	0	0	0	0	0	0	0	65	1	1	92	1	1	37.1111	0	1	86.3333	0	0	0	0	1	274	0	1	1	0	1	29	0	1
1	1	6	0	0-60	2	1	0	0	0	0	0	0	0	0	0	0	0	0	0	0	0	0	0	0	0	55	0	1	100	0	1	37.3889	0	1	123	0	1	0.57	0	1	187	0	1	0.9	0	1	24	0	1
1	1	2	0	>70	2	0	1	0	0	0	0	0	0	0	0	1	1	0	0	0	0	0	0	0	0	77	2	1	96	0	1	37.8333	0	1	77	0	0	0	0	1	271	0	1	1.1	0	1	16	0	1
1	0	0	0	0-60	7	1	0	0	1	1	0	1	1	0	0	0	1	1	1	1	0	0	0	0	0	53	0	1	97	0	1	37	0	1	78.6667	0	1	3.16	1	1	6	2	1	1.4	1	1	22	0	1
1	1	1	0	0-60	1	1	0	0	0	0	0	0	0	0	0	0	0	0	0	0	0	0	0	0	0	48	0	1	92	1	1	35.5556	0	1	116.333	0	1	1.78	0	1	201	0	1	0.9	0	1	11	0	1
1	1	4	0	>80	5	1	0	0	0	0	1	0	1	0	0	0	0	1	0	0	0	0	0	0	0	90	3	1	98	0	1	36.7222	0	1	82	0	1	5.54	1	1	263	0	1	1.2	1	1	27	0	1
1	1	3	0	0-60	0	0	0	0	1	0	1	0	0	0	0	0	0	0	0	0	0	0	0	0	0	25	0	1	98	0	1	37.2778	0	1	93.3333	0	1	0.26999	0	1	353	0	1	1	0	1	11	0	1
1	1	2	0	0-60	2	1	0	0	0	0	0	0	0	0	0	0	0	0	0	0	0	0	0	0	0	33	0	1	92	1	1	37.7778	0	1	91.6667	0	1	1.65	0	1	321	0	1	1.1	0	1	12	0	1
1	1	2	0	0-60	1	0	0	0	1	0	1	0	0	0	0	0	0	0	0	0	0	0	0	0	0	26	0	0	0	1	0	0	0	0	0	0	0	0	0	0	0	0	0	0	0	0	0	0	0
1	1	3	0	0-60	3	1	0	0	0	0	0	0	0	0	0	0	0	0	0	0	0	0	0	0	0	55	0	1	93	1	1	37.6111	0	1	93.3333	0	1	0.69	0	1	290	0	1	1	0	1	19	0	1
1	1	15	0	0-60	3	0	0	0	1	0	0	0	0	0	0	0	0	0	0	0	0	0	0	0	0	53	0	1	86	1	1	37.5556	0	1	73.6667	0	1	0.26999	0	1	191	0	1	1.1	0	1	18	0	1
1	1	7	1	>70	3	0	0	0	1	0	0	0	0	0	0	1	1	1	1	1	0	0	0	0	0	76	2	1	98	0	1	36.6667	0	1	45	1	0	0	0	1	202	0	1	1	0	1	16	0	1
1	0	0	0	0-60	2	0	0	0	1	0	0	0	0	0	0	0	0	0	1	1	0	0	0	1	0	54	0	1	84	1	1	36.8333	0	1	72	0	1	1.56	0	1	250	0	1	1.1	0	1	17	0	1
1	1	1	0	>70	2	1	0	0	0	0	0	0	0	0	0	1	1	0	0	0	0	0	0	0	0	73	2	1	97	0	1	37	0	1	80	0	0	0	0	1	380	0	0	1.3	0	1	22	0	1
1	1	6	1	>80	6	0	0	0	1	0	0	0	0	0	0	0	0	0	0	0	0	0	0	0	0	91	3	1	100	0	1	38.0556	1	1	106	0	0	0	0	1	87	2	1	1	0	1	26	0	1
1	1	4	1	>60	1	1	0	0	0	0	0	0	0	0	0	0	0	0	0	0	0	0	0	0	0	61	1	1	97	0	1	37.4444	0	1	95.3333	0	0	0	0	1	164	0	1	1	0	1	12	0	1
1	1	9	0	>70	4	0	0	0	1	0	0	0	0	0	0	0	0	0	0	0	0	0	0	0	0	72	2	1	93	1	1	36.9444	0	1	115.333	0	0	0	0	1	171	0	1	1.1	0	1	46	1	1
1	1	1	0	0-60	0	1	0	0	0	0	1	0	0	0	0	1	1	0	0	0	0	0	0	0	0	56	0	1	97	0	1	36.1111	0	1	104.667	0	1	0.29	0	1	326	0	1	1	0	1	18	0	1
1	1	18	1	0-60	4	0	0	0	1	0	0	0	0	0	0	0	0	0	0	0	0	0	0	0	0	44	0	1	47	1	1	37.5	0	1	82.6667	0	1	3.97	1	1	238	0	1	1	1	1	23	0	1
1	1	7	0	>70	5	1	0	0	0	0	1	0	1	1	0	0	0	0	0	0	0	0	0	0	0	76	2	1	98	0	1	37.5556	0	1	90.3333	0	1	3.78	1	1	356	0	1	1.1	1	1	44	1	1
1	0	0	0	>70	8	1	0	0	0	0	2	0	1	0	0	0	0	0	0	0	0	0	0	0	0	77	2	1	92	1	1	36	0	1	85	0	1	3.49	1	1	238	0	1	2.3	1	1	42	1	1
1	1	33	1	>70	4	0	0	0	1	0	0	0	0	0	0	0	0	0	0	0	0	0	0	0	0	72	2	0	0	1	0	0	0	0	0	0	1	4.66	1	0	0	0	0	0	1	0	0	0	0
1	1	8	1	>70	8	0	0	0	0	0	0	0	0	0	0	0	0	0	0	0	0	0	0	0	0	71	2	1	30	1	1	37.0556	0	1	48.6667	1	1	20	1	1	385	0	1	1.6	1	1	14	0	1
1	1	5	0	>60	5	1	0	0	0	0	1	0	0	0	0	0	0	0	0	0	0	0	0	0	0	69	1	1	95	0	1	36.2778	0	1	108.333	0	1	4.58	1	1	127	1	1	1	1	1	46	1	1
1	1	3	0	0-60	1	1	0	0	0	0	0	0	0	0	0	0	0	0	1	1	0	0	0	1	0	59	0	1	95	0	1	37.2778	0	1	108.333	0	1	0.8	0	1	213	0	1	1	0	1	21	0	1
1	1	7	0	0-60	0	0	0	0	1	0	0	0	0	0	0	0	0	0	0	0	0	0	0	0	0	49	0	1	99	0	1	37.1111	0	1	90.3333	0	0	0	0	1	203	0	1	1	0	1	10	0	1
1	1	23	0	0-60	0	1	0	0	0	0	1	0	0	0	0	1	1	1	0	0	0	0	0	0	0	30	0	1	100	0	1	36.7778	0	1	104	0	0	0	0	1	280	0	1	1.1	0	1	6	0	1
1	1	6	0	>70	6	1	0	0	0	0	0	1	0	0	0	0	0	1	0	0	0	0	0	0	0	77	2	1	90	1	1	39.0556	1	1	87.6667	0	1	2.74	0	1	285	0	1	1.2	0	1	48	1	1
1	1	6	0	0-60	0	1	0	0	0	0	0	0	0	0	1	0	0	0	0	0	0	0	0	0	0	39	0	1	96	0	1	36.6667	0	1	111.333	0	0	0	0	1	321	0	1	1.2	0	1	10	0	1
1	1	2	0	>80	4	0	0	0	1	0	1	0	0	1	0	0	0	1	0	0	0	0	0	0	0	84	3	1	93	1	1	37.0556	0	1	90.6667	0	1	0.99	0	1	308	0	1	1	0	1	11	0	1
1	1	6	0	>60	5	1	0	0	0	0	0	0	0	0	0	0	0	1	0	0	0	0	0	0	0	61	1	1	87	1	1	36.9444	0	1	81.6667	0	1	7.76	1	1	376	0	1	1.2	1	1	29	0	1
1	1	2	1	>60	6	1	0	0	0	0	0	0	0	0	0	0	0	0	0	0	0	0	0	0	0	68	1	1	100	0	1	36.3333	0	1	55	1	0	0	0	1	299	0	1	1.4	0	1	144	1	1
1	1	2	1	>80	10	1	0	0	0	0	0	0	0	0	0	0	0	0	1	1	0	0	0	0	0	83	3	1	88	1	1	37.5	0	1	64	0	1	20	1	1	309	0	1	1.3	1	0	0	0	1
1	1	10	1	>60	2	1	0	0	0	0	0	0	0	0	0	0	0	0	0	0	0	0	0	0	0	67	1	0	0	1	1	-17.7778	0	1	75.6667	0	0	0	0	0	0	0	0	0	0	0	0	0	0
1	1	29	0	>80	5	0	0	0	1	0	0	0	0	0	0	0	0	0	0	0	0	0	0	0	0	81	3	0	0	1	0	0	0	0	0	0	0	0	0	1	249	0	1	1.1	0	1	47	1	1
1	1	10	0	0-60	4	0	0	0	1	0	0	0	1	1	0	0	0	1	0	0	0	0	0	0	0	56	0	1	93	1	1	37.7222	0	1	98.6667	0	1	1.84	0	1	129	1	1	1.1	0	1	18	0	1
1	1	5	0	>60	6	1	0	0	0	0	0	0	0	0	0	0	0	0	0	0	0	0	0	0	0	69	1	1	88	1	1	36.8333	0	1	97	0	1	2.41	0	1	205	0	1	1.3	0	1	30	0	1
1	0	0	0	>70	5	1	0	0	0	0	0	0	0	0	0	0	1	1	0	0	0	0	0	0	0	71	2	1	94	0	1	34.8889	0	1	94.3333	0	1	17.77	1	1	278	0	1	0.9	1	1	53	1	1
1	1	19	1	>80	7	0	0	0	1	0	0	0	0	0	0	0	0	0	0	0	0	0	0	0	0	89	3	1	100	0	1	36.6667	0	1	57	1	1	2.79	0	1	298	0	1	1.1	0	0	0	0	1
1	1	9	0	>80	6	1	0	0	0	0	1	1	0	0	0	1	1	1	1	1	0	0	0	0	0	82	3	1	0	1	1	0	0	0	0	0	1	0	0	1	0	2	1	0	0	0	0	0	0
1	1	4	0	0-60	0	1	0	0	0	0	0	0	0	0	0	0	0	1	0	0	0	0	0	0	0	34	0	1	94	0	1	39.1111	1	1	84	0	1	0.74	0	1	298	0	1	1	0	1	7	0	1
1	1	2	0	0-60	2	0	0	0	0	0	0	0	0	0	0	0	0	0	0	0	0	0	0	0	0	58	0	1	95	0	1	38.6667	1	1	87	0	1	3.88	1	1	241	0	1	1.1	1	1	16	0	1
1	1	1	0	0-60	0	1	0	0	0	1	0	0	1	0	0	0	1	1	0	0	0	0	0	0	0	42	0	1	99	0	1	37.1667	0	1	102	0	0	0	0	1	320	0	1	1	0	1	11	0	1
1	1	4	0	>80	3	0	0	0	1	0	0	1	0	0	0	0	0	1	0	0	0	0	0	0	0	94	3	1	98	0	1	36.8889	0	1	105	0	1	2.42	0	1	218	0	1	1.1	0	1	34	1	1
1	0	0	0	0-60	4	0	0	0	1	0	1	0	0	0	0	0	0	0	0	0	0	0	0	0	0	57	0	1	55	1	1	37.2222	0	1	65.6667	0	1	1.25	0	1	218	0	1	1.1	0	1	46	1	1
1	1	5	0	>60	3	0	0	0	1	0	0	0	1	0	0	0	0	0	0	0	0	0	0	0	0	63	1	1	89	1	1	37.1667	0	1	82.3333	0	0	0	0	1	194	0	1	1	0	1	8	0	1
1	1	4	0	>70	4	1	0	0	0	0	1	0	1	0	0	0	0	0	0	0	0	0	0	0	0	72	2	1	98	0	1	36.3889	0	1	76.3333	0	1	0.86	0	1	117	1	1	1	0	1	53	1	1
1	1	2	0	>60	2	1	0	0	0	1	1	1	0	0	0	1	1	1	1	1	0	0	1	0	0	63	1	0	0	1	0	0	0	0	0	0	1	1.15	0	1	174	0	1	1.1	0	1	9	0	1
1	1	1	0	>80	3	0	1	0	0	0	1	0	0	0	0	0	0	0	0	0	0	0	0	0	0	82	3	1	95	0	1	36.9444	0	1	101.667	0	1	0.7	0	1	299	0	1	1.1	0	1	25	0	1
1	1	9	0	>60	4	1	0	0	0	0	0	0	0	0	0	0	0	0	0	0	0	0	0	0	0	68	1	1	100	0	1	37.3889	0	1	91.6667	0	0	0	0	1	89	2	1	1	0	1	25	0	1
1	0	0	0	0-60	2	0	0	0	1	0	1	1	0	0	0	0	0	0	0	0	0	0	0	0	0	37	0	1	97	0	1	38.6667	1	1	79	0	1	4.71	1	1	534	0	1	1.5	1	1	15	0	1
1	1	3	0	0-60	0	0	0	0	1	0	1	0	0	0	0	0	0	1	0	0	0	0	0	0	0	51	0	1	94	0	1	37.6111	0	1	85	0	1	0.46	0	1	209	0	1	1	0	1	16	0	1
1	1	1	0	0-60	0	0	0	0	1	0	1	0	0	0	0	0	0	0	0	0	0	0	0	0	0	37	0	1	97	0	1	37	0	1	76.6667	0	1	1.69	0	1	433	0	1	1.1	0	1	17	0	1
1	1	8	1	>80	7	0	0	0	1	0	0	0	0	0	0	0	0	0	0	0	0	0	0	0	0	82	3	1	96	0	1	37.3333	0	1	75	0	1	0.98	0	1	113	1	1	1.4	0	1	51	1	1
1	1	3	0	>60	3	1	0	0	0	0	1	0	0	0	0	1	1	0	0	0	0	0	0	0	0	67	1	1	99	0	1	37.0556	0	1	96	0	1	1.25	0	1	107	1	1	1.1	0	1	20	0	1
1	1	2	0	>80	4	0	1	0	0	0	2	0	0	0	0	0	1	1	0	0	0	0	0	0	0	88	3	1	97	0	1	37.4444	0	1	95.3333	0	1	0.84	0	1	273	0	1	1.1	0	1	19	0	1
1	1	16	1	>60	5	0	0	0	0	0	0	0	0	0	0	0	0	0	0	0	0	0	0	0	0	62	1	1	39	1	1	39.4444	1	1	91	0	1	2.17	0	1	315	0	1	1.2	0	0	0	0	1
1	1	14	1	>60	7	0	0	0	1	0	1	0	0	0	0	0	0	0	0	0	0	0	0	0	0	61	1	1	87	1	1	38.1667	1	1	58	1	1	5.67	1	1	350	0	1	1.3	1	1	53	1	1
1	1	2	1	>60	7	1	0	0	0	0	0	0	0	1	0	0	0	0	0	0	0	0	0	0	0	63	1	1	75	1	1	37.6667	0	1	74.6667	0	1	1.76	0	1	73	2	1	1.1	0	1	57	1	1
1	1	2	0	0-60	1	0	0	0	1	0	1	0	0	0	0	1	1	0	0	0	0	0	0	0	0	58	0	1	96	0	1	36.8889	0	1	93.6667	0	1	0.42	0	1	323	0	1	1	0	1	13	0	1
1	1	16	1	0-60	1	0	0	0	1	0	1	0	1	0	0	0	0	0	0	0	0	0	0	0	0	29	0	1	97	0	1	39.0556	1	1	95.3333	0	1	2.2	0	1	403	0	1	1.1	0	1	9	0	1
1	1	5	0	0-60	1	0	0	0	1	0	0	0	0	0	0	0	0	0	1	0	0	1	0	0	0	48	0	0	0	1	0	0	0	0	0	0	0	0	0	1	354	0	0	0	0	1	16	0	1
1	0	0	0	0-60	4	0	0	0	1	0	1	0	0	0	0	0	0	0	0	0	0	0	0	0	0	58	0	1	81	1	1	38.3889	1	1	83.3333	0	1	3.69	1	1	154	0	1	1	1	1	13	0	1
1	1	6	0	0-60	1	0	0	0	1	0	0	0	0	0	0	0	0	0	0	0	0	0	0	0	0	58	0	1	95	0	1	38.1111	1	1	92.6667	0	0	0	0	1	294	0	1	1.2	0	1	12	0	1
1	1	10	0	0-60	2	1	0	0	0	0	0	0	0	0	0	0	0	0	0	0	0	0	0	0	0	37	0	1	88	1	1	37.5556	0	1	93.3333	0	1	1	0	1	152	0	1	1	0	1	12	0	1
1	1	4	0	>60	4	0	0	0	1	0	0	0	0	0	0	0	0	0	1	1	0	0	1	0	0	63	1	1	99	0	1	37	0	1	91.6667	0	1	0.87	0	1	93	2	1	1	0	1	21	0	1
1	1	2	0	>60	1	0	0	0	1	0	0	0	0	0	0	0	0	1	0	0	0	0	0	0	0	63	1	1	95	0	1	38.9444	1	1	86.6667	0	0	0	0	1	254	0	1	1	0	1	13	0	1
1	1	5	0	>80	4	1	0	0	0	0	0	0	0	0	0	0	0	0	0	0	0	0	0	0	0	81	3	1	100	0	1	36.6111	0	1	84.3333	0	0	0	0	1	307	0	1	1.1	0	1	60	1	1
1	1	32	0	0-60	2	1	0	0	1	0	0	0	0	0	0	0	0	1	0	0	0	0	0	0	0	49	0	1	80	1	1	37.2778	0	1	80	0	1	0.44	0	1	242	0	1	1.1	0	0	0	0	1
1	1	8	1	>60	6	0	0	0	1	0	1	0	1	0	0	0	0	1	1	1	0	0	0	1	0	65	1	1	84	1	1	37.3889	0	1	54.3333	1	1	3.55	1	1	294	0	1	1.2	1	0	0	0	1
1	1	30	1	0-60	5	0	0	0	1	0	0	0	1	1	0	0	0	0	1	0	0	1	0	0	0	53	0	1	84	1	1	37.6111	0	1	46.6667	1	1	7.42	1	1	160	0	1	1	1	1	15	0	1
1	1	11	0	>80	4	0	1	0	0	0	0	0	0	0	0	0	0	0	0	0	0	0	0	0	0	88	3	1	95	0	1	36.8333	0	1	83.3333	0	1	0.76	0	1	281	0	1	1.3	0	1	39	1	1
1	1	8	0	>60	3	0	1	0	1	0	0	0	0	0	0	0	0	1	0	0	0	0	0	0	0	67	1	1	84	1	1	36.8889	0	1	88	0	1	2	0	1	219	0	1	1.1	0	1	34	1	1
1	1	4	0	0-60	2	1	0	0	1	0	1	0	0	0	0	0	0	0	0	0	0	0	0	0	0	57	0	1	89	1	1	36.8333	0	1	91.3333	0	1	1.41	0	1	198	0	1	1.2	0	1	18	0	1
1	1	19	0	0-60	4	0	0	0	1	1	1	1	0	1	0	0	1	1	0	0	0	0	0	0	0	57	0	1	92	1	1	37.3333	0	1	103.333	0	1	0.77	0	1	254	0	1	1.4	0	1	7	0	1
1	1	5	1	>60	5	0	0	0	1	0	1	0	0	0	0	0	0	0	0	0	0	0	0	0	0	68	1	1	72	1	1	37.1111	0	1	79	0	0	0	0	1	280	0	1	1	0	1	77	1	1
1	1	11	1	>60	5	0	0	0	0	1	1	1	0	0	1	1	1	1	0	0	0	0	0	0	0	63	1	1	92	1	1	36.5556	0	1	85.3333	0	1	20	1	1	198	0	1	1	1	1	11	0	1
1	1	5	1	>70	5	1	0	0	0	0	0	0	0	0	0	0	0	0	0	0	0	0	0	0	0	77	2	1	88	1	1	37.1667	0	1	118	0	1	0.46	0	1	201	0	1	1.5	0	1	18	0	1
1	1	2	0	0-60	2	1	0	0	0	0	0	0	0	0	0	0	0	0	1	1	0	0	0	0	0	60	0	1	99	0	1	36.8889	0	1	86	0	1	2.21	0	1	299	0	1	1.1	0	1	38	1	1
1	1	6	0	0-60	2	1	0	0	0	0	0	0	0	0	0	0	0	0	0	0	0	0	0	0	0	49	0	1	92	1	1	37.1667	0	1	88.6667	0	0	0	0	1	199	0	1	1	0	1	8	0	1
1	1	8	0	0-60	3	1	0	0	0	0	1	0	1	0	1	0	0	0	0	0	0	0	0	0	0	39	0	1	90	1	1	37.4444	0	1	110.667	0	1	0.26999	0	1	317	0	1	1.1	0	1	12	0	1
1	1	5	0	>70	4	0	0	0	1	0	0	1	0	0	0	1	1	1	0	0	0	0	0	0	0	72	2	1	95	0	1	37.7222	0	1	92	0	1	0.92	0	1	133	1	1	1	0	1	22	0	1
1	1	3	1	>60	5	0	0	0	1	0	0	0	1	1	0	0	0	1	0	0	0	0	0	0	0	66	1	1	89	1	1	37.3889	0	1	72.3333	0	1	6.18	1	1	225	0	1	1	1	0	0	0	1
1	1	8	0	>70	5	0	1	0	0	0	0	0	1	1	0	1	1	1	0	0	0	0	0	0	0	76	2	1	90	1	1	38.3333	1	1	96.3333	0	1	4.33	1	1	212	0	1	1.2	1	1	27	0	1
1	1	11	0	>70	3	0	1	0	0	0	0	0	0	0	0	0	0	0	0	0	0	0	0	0	0	78	2	1	100	0	1	37.0556	0	1	85.3333	0	1	0.86	0	1	117	1	1	1	0	1	18	0	1
1	1	10	0	>80	5	0	0	0	1	0	0	0	0	0	0	0	0	0	0	0	0	0	0	0	0	90	3	1	95	0	1	36.7222	0	1	74	0	1	20	1	1	276	0	1	1.6	1	1	20	0	1
1	1	2	0	>60	2	0	0	0	1	1	1	1	0	0	0	0	1	1	0	0	0	0	0	0	0	65	1	1	100	0	1	37.8889	0	1	95.3333	0	1	0.83	0	1	275	0	1	1.2	0	1	24	0	1
1	1	18	0	>80	10	1	0	0	0	0	0	0	0	0	0	0	0	0	0	0	0	0	0	0	0	82	3	1	98	0	1	36.4444	0	1	85.6667	0	1	20	1	1	87	2	1	1.3	1	1	149	1	1
1	1	4	0	>60	6	0	0	0	1	0	0	0	0	0	0	0	0	0	0	0	0	0	0	0	0	70	1	1	100	0	1	36.6667	0	1	109.667	0	1	14.89	1	1	125	1	1	1.9	1	1	50	1	1
1	1	6	0	>80	7	0	0	0	1	0	0	0	0	0	0	0	0	1	0	0	0	0	0	0	0	86	3	1	97	0	1	36.7222	0	1	76	0	0	0	0	1	232	0	1	1.5	0	1	76	1	1
1	1	14	0	>70	3	0	0	0	1	0	0	0	0	0	0	0	0	0	0	0	0	0	0	0	0	77	2	1	94	0	1	37	0	1	83.6667	0	1	0.93	0	1	173	0	1	1	0	1	21	0	1
1	1	10	0	>70	5	0	1	0	1	0	0	0	0	0	0	1	1	0	0	0	0	0	0	0	0	79	2	1	93	1	1	38	0	1	70.3333	0	1	1.67	0	1	273	0	0	0	0	1	63	1	1
1	1	1	0	>60	3	0	0	0	0	0	0	0	0	0	0	0	0	0	0	0	0	0	0	0	0	70	1	1	93	1	1	35.6111	0	1	87	0	1	0.67	0	1	283	0	1	1	0	1	30	0	1
1	0	0	0	0-60	0	0	0	0	1	0	1	0	0	0	0	0	0	0	0	0	0	0	0	0	0	38	0	1	100	0	1	36.5	0	1	90.6667	0	1	0.41	0	1	193	0	0	0	0	1	7	0	1
1	1	5	1	>60	5	1	0	0	0	0	0	0	1	1	1	0	0	1	0	0	0	0	0	0	0	68	1	1	98	0	1	36.7778	0	0	0	0	1	1.35	0	1	574	0	1	2.3	0	1	72	1	1
1	1	1	0	>60	3	1	0	0	0	0	1	0	0	0	0	0	0	0	0	0	0	0	0	0	0	63	1	1	93	1	1	37.0556	0	1	89	0	1	2.4	0	1	471	0	1	1.2	0	1	11	0	1
1	1	7	0	0-60	3	1	0	0	0	0	0	0	0	1	0	0	0	0	0	0	0	0	0	0	0	46	0	1	95	0	1	37	0	1	90	0	0	0	0	1	344	0	1	1.1	0	1	66	1	1
1	0	0	0	0-60	3	1	0	0	0	0	0	0	0	0	0	0	0	0	0	0	0	0	0	0	0	44	0	1	99	0	1	36.6111	0	1	86.3333	0	1	3.15	1	1	457	0	1	1	1	1	107	1	1
1	1	4	0	>70	2	0	0	0	0	0	1	1	1	0	0	1	1	1	0	0	0	0	0	0	0	74	2	1	98	0	1	36.6111	0	1	90	0	1	0	0	1	547	0	1	0	0	1	11	0	1
1	1	4	0	0-60	3	0	0	0	1	0	1	1	1	1	0	0	0	1	0	0	0	0	0	0	0	52	0	1	91	1	1	39.5	1	1	93.6667	0	1	2.17	0	1	226	0	1	1	0	1	13	0	1
1	1	26	0	>60	4	0	0	0	0	0	0	0	0	1	0	0	0	1	0	0	0	0	0	0	0	66	1	1	93	1	1	38.8889	1	1	79.3333	0	1	1.73	0	1	172	0	1	1	0	1	21	0	1
1	1	4	0	>60	3	0	0	0	1	0	0	0	0	0	0	0	0	0	0	0	0	0	0	0	0	69	1	1	93	1	1	37.0556	0	1	93.3333	0	1	1.84	0	1	332	0	1	1	0	1	38	1	1
1	1	4	0	0-60	0	1	0	0	0	0	0	0	0	0	0	0	0	0	0	0	0	0	0	0	0	42	0	1	94	0	1	37.5556	0	1	103.333	0	1	2.24	0	1	306	0	1	1.1	0	1	8	0	1
1	1	7	0	0-60	2	0	0	0	0	0	0	0	0	0	1	0	0	1	0	0	0	0	0	0	0	22	0	1	96	0	1	34.2778	0	1	89.3333	0	1	0.35	0	1	99	2	1	1	0	1	13	0	1
1	1	5	1	>70	9	0	0	0	0	0	0	1	0	0	0	1	1	1	0	0	0	0	0	0	0	80	2	1	77	1	1	37.3889	0	1	35.3333	1	1	20	1	1	267	0	0	0	1	1	140	1	1
1	1	5	0	0-60	0	0	0	0	1	0	0	0	0	0	0	0	0	0	0	0	0	0	0	0	0	59	0	1	94	0	1	37.5556	0	1	97.6667	0	0	0	0	1	238	0	1	1	0	1	10	0	1
1	1	14	0	0-60	3	0	1	0	1	0	0	0	0	0	0	0	0	0	0	0	0	0	0	0	0	49	0	1	98	0	1	37.2222	0	1	92	0	0	0	0	1	156	0	1	1.1	0	1	68	1	1
1	1	2	0	>70	3	1	0	0	0	0	1	1	0	0	0	1	1	1	0	0	0	0	0	0	0	80	2	1	97	0	1	36.8333	0	1	86.6667	0	0	0	0	1	156	0	1	1	0	1	12	0	1
1	1	13	1	>60	4	1	0	0	0	0	0	0	0	0	0	0	0	0	0	0	0	0	0	0	0	69	1	1	97	0	1	37.4444	0	1	74.3333	0	1	20	1	1	356	0	1	1.2	1	0	0	0	1
1	0	0	0	>80	7	0	0	0	0	0	2	1	1	0	1	0	0	0	0	0	0	0	0	0	0	81	3	1	97	0	1	36.6667	0	1	78	0	1	1.52	0	1	191	0	1	1.8	0	1	47	1	1
1	1	1	0	>60	2	1	0	0	0	0	0	0	0	0	0	0	0	0	1	1	0	0	0	0	0	65	1	1	94	0	1	37.1667	0	1	116.333	0	0	0	0	1	250	0	1	1.1	0	1	38	1	1
1	1	13	0	0-60	1	1	0	0	0	0	0	0	0	0	0	0	0	0	0	0	0	0	0	0	0	21	0	1	100	0	1	36.7778	0	1	82.6667	0	0	0	0	1	234	0	0	0	0	1	14	0	1
1	1	12	0	>60	6	0	0	0	1	0	0	0	0	0	1	0	0	0	0	0	0	0	0	0	0	66	1	1	97	0	1	37.1111	0	1	66.3333	0	1	4.48	1	1	323	0	1	1.2	1	1	64	1	1
1	1	3	0	>70	3	0	0	0	1	0	0	0	0	0	0	0	0	0	0	0	0	0	0	0	0	77	2	1	97	0	1	36.7778	0	1	98.3333	0	1	0.42	0	1	256	0	1	1.2	0	1	15	0	1
1	1	3	0	>70	4	0	0	0	1	0	0	0	0	0	0	0	0	0	0	0	0	0	0	0	0	72	2	1	98	0	1	36.7222	0	1	74	0	1	1.2	0	1	312	0	1	0.9	0	1	43	1	1
1	1	1	0	>60	1	0	0	0	0	0	0	0	0	0	0	0	0	0	0	0	0	0	0	0	0	69	1	1	97	0	1	37.0556	0	1	84	0	1	0.44	0	1	247	0	1	1.2	0	1	20	0	1
1	1	13	1	>60	5	0	0	0	1	0	0	1	0	0	1	0	0	1	0	0	0	0	0	0	0	61	1	1	79	1	1	36.5556	0	1	85.6667	0	1	3.51	1	1	220	0	1	1.1	1	1	86	1	1
1	0	0	0	>70	5	0	0	0	0	0	0	0	0	0	0	0	0	1	0	0	0	0	0	0	0	73	2	1	100	0	1	36.3889	0	1	93.3333	0	0	0	0	1	44	2	1	1	0	1	21	0	1
1	1	3	0	0-60	0	0	0	0	1	0	0	0	0	0	0	0	0	0	0	0	0	0	0	0	0	25	0	1	98	0	1	36.2222	0	1	85	0	1	0.34	0	1	281	0	1	1	0	1	10	0	1
1	1	7	0	0-60	2	1	0	0	0	0	0	0	0	0	0	0	0	0	0	0	0	0	0	0	0	46	0	1	92	1	1	39.5556	1	1	78	0	1	1.38	0	1	204	0	1	1	0	1	18	0	1
1	1	17	0	>60	2	1	0	0	0	0	0	0	0	0	0	0	0	0	0	0	0	0	0	0	0	70	1	0	0	1	0	0	0	0	0	0	0	0	0	0	0	0	0	0	0	0	0	0	0
1	1	2	0	0-60	0	0	0	0	1	0	0	0	0	0	0	0	0	0	0	0	0	0	0	0	0	24	0	1	100	0	1	36.5556	0	1	92.6667	0	1	0.26999	0	1	261	0	1	1	0	1	9	0	1
1	1	1	0	0-60	1	0	0	0	1	0	0	0	0	0	0	0	0	1	0	0	0	0	0	0	0	52	0	1	99	0	1	37.2778	0	1	84.6667	0	1	2.89	0	1	263	0	0	0	0	1	22	0	1
1	1	2	1	>80	8	0	0	0	0	0	0	0	0	0	0	0	0	0	0	0	0	0	0	0	0	86	3	1	100	0	1	38.0556	1	1	57.6667	0	1	15.84	1	1	167	0	1	1.1	1	1	71	1	1
1	1	3	0	>60	3	1	0	0	0	0	0	0	0	0	0	0	0	0	0	0	0	0	0	0	0	66	1	1	90	1	1	37.1667	0	1	77.6667	0	0	0	0	1	303	0	1	1.3	0	1	12	0	1
1	1	1	0	>60	1	0	0	0	1	1	1	1	0	0	0	1	1	1	0	0	0	0	0	0	0	64	1	1	98	0	1	36.6111	0	1	98.6667	0	1	0.52	0	1	180	0	1	1	0	1	31	1	1
1	1	4	0	>60	4	0	0	0	1	1	1	0	1	1	0	0	1	0	0	0	0	0	0	0	0	67	1	1	88	1	1	36.8889	0	1	86.6667	0	1	14.19	1	1	220	0	1	1	1	1	18	0	1
1	1	4	0	>80	6	0	0	0	1	0	0	0	0	0	0	0	0	0	0	0	0	0	0	0	0	93	3	1	94	0	1	36.8889	0	1	103.333	0	1	2.38	0	1	132	1	1	1.1	0	1	34	1	1
1	1	17	0	0-60	2	0	1	0	0	0	0	0	0	0	0	0	0	0	0	0	0	0	0	0	0	56	0	1	87	1	1	38.7222	1	1	105.333	0	1	1.06	0	1	149	1	1	0.9	0	1	18	0	1
1	1	2	0	0-60	0	0	0	0	1	0	0	0	0	0	0	0	0	1	0	0	0	0	0	0	0	42	0	1	98	0	1	36.9444	0	1	88	0	0	0	0	1	158	0	0	0	0	1	5	0	1
1	1	2	1	>70	9	1	0	0	0	0	0	0	0	0	0	0	0	0	0	0	0	0	0	0	0	73	2	1	73	1	1	35.3889	0	1	65	0	1	20	1	1	187	0	1	1.3	1	1	102	1	1
1	1	1	0	>60	2	0	1	0	0	0	0	0	0	0	0	0	0	0	0	0	0	0	0	0	0	68	1	1	94	0	1	36.5556	0	1	93	0	1	4.83	1	1	309	0	1	1.2	1	1	23	0	1
1	1	30	1	>80	4	0	0	0	1	0	1	0	0	0	0	0	0	1	1	1	0	0	0	0	0	84	3	1	97	0	1	36.4444	0	1	118	0	1	6.13	1	1	404	0	1	1.1	1	0	0	0	1
1	1	21	1	>60	5	1	0	0	0	0	1	1	0	1	0	1	1	1	0	0	0	0	0	0	0	67	1	1	93	1	1	38.2778	1	1	55	1	1	1.35	0	1	157	0	1	1.2	0	0	0	0	1
1	1	6	0	>80	4	1	0	0	0	0	0	0	0	0	0	0	0	0	0	0	0	0	0	0	0	81	3	1	100	0	1	36.3333	0	1	89	0	0	0	0	1	250	0	1	1.1	0	1	38	1	1
1	1	16	0	>60	3	0	0	0	1	0	0	0	0	0	0	1	1	0	0	0	0	0	0	0	0	67	1	1	93	1	1	37.7778	0	1	104.333	0	1	4.55	1	1	303	0	1	1	1	1	11	0	1
1	1	5	0	0-60	1	0	0	0	0	0	1	0	0	1	0	0	0	0	0	0	0	0	0	0	0	46	0	1	90	1	1	38.4444	1	1	94.6667	0	1	0.78	0	1	182	0	1	1.1	0	1	10	0	1
1	1	9	0	0-60	3	1	0	0	0	0	0	0	0	0	0	0	0	0	0	0	0	0	0	0	0	58	0	1	89	1	1	37.0556	0	1	97.3333	0	1	1.64	0	1	416	0	1	1.1	0	1	8	0	1
1	1	3	0	>60	2	0	0	0	1	0	0	0	0	0	0	1	1	0	1	0	1	0	0	0	0	62	1	0	0	1	0	0	0	0	0	0	1	1.04	0	0	0	0	0	0	0	0	0	0	0
1	1	7	0	>70	4	1	0	0	0	0	0	0	0	0	0	0	0	0	0	0	0	0	0	0	0	80	2	1	97	0	1	34.6667	0	1	94	0	1	17.72	1	1	237	0	1	1	1	1	21	0	1
1	1	12	1	0-60	1	0	0	0	0	1	0	1	0	0	0	0	1	1	0	0	0	0	0	0	0	37	0	1	95	0	1	37.5	0	1	66.6667	0	1	1.36	0	1	183	0	1	1	0	1	13	0	1
1	1	4	0	0-60	1	0	0	0	1	0	0	0	0	0	0	0	0	1	0	0	0	0	0	0	0	60	0	1	95	0	1	38.3889	1	1	84.6667	0	0	0	0	1	208	0	1	0.9	0	1	7	0	1
1	1	2	0	>60	1	0	1	0	0	0	0	0	0	0	0	0	0	1	1	1	0	0	0	0	0	62	1	1	94	0	1	36.9444	0	1	79.3333	0	1	1.89	0	1	302	0	1	1.1	0	0	0	0	1
1	1	8	0	>60	6	1	0	0	0	0	0	0	0	0	0	0	0	0	0	0	0	0	0	0	0	70	1	1	100	0	1	37.5	0	1	64.6667	0	1	0.88	0	1	149	1	1	1.6	0	1	38	1	1
1	1	10	0	0-60	1	0	0	0	1	0	2	0	0	0	0	0	0	0	0	0	0	0	0	0	0	43	0	0	0	1	0	0	0	0	0	0	0	0	0	0	0	0	0	0	0	0	0	0	0
1	1	12	1	0-60	4	0	1	0	0	0	1	0	0	0	0	1	1	1	0	0	0	0	0	0	0	58	0	1	100	0	1	36.5556	0	0	0	0	1	4.16	1	1	156	0	1	1.1	1	1	143	1	1
1	1	10	0	>60	5	1	0	0	0	0	0	0	0	0	0	0	0	0	1	1	0	0	0	0	0	70	1	1	99	0	1	39.2778	1	1	108.667	0	1	9.73	1	1	156	0	1	1	1	0	0	0	1
1	1	5	0	>60	2	1	0	0	0	0	0	0	0	0	1	0	0	0	0	0	0	0	0	0	0	69	1	1	98	0	1	37.7778	0	1	69.6667	0	1	0.76	0	1	217	0	1	1	0	1	21	0	1
1	1	3	1	>70	4	1	0	0	0	0	0	0	0	0	0	0	0	0	0	0	0	0	0	0	0	74	2	1	94	0	1	37.8333	0	1	84.6667	0	1	2.19	0	1	253	0	1	1.1	0	1	17	0	1
1	1	7	0	>70	4	0	0	0	0	1	1	0	1	0	0	0	1	1	1	1	0	0	0	0	0	74	2	1	84	1	1	37.2778	0	1	104	0	1	1.85	0	1	378	0	1	1.2	0	1	42	1	1
1	1	7	1	>70	5	0	0	0	1	0	0	0	0	0	0	0	0	0	1	1	0	0	1	0	0	76	2	1	94	0	1	37.3333	0	1	55.3333	1	1	1.24	0	1	102	1	1	1	0	0	0	0	1
1	1	8	0	>60	5	0	0	0	1	0	0	0	0	0	0	0	0	0	0	0	0	0	0	0	0	62	1	1	94	0	1	39.4444	1	1	78.3333	0	1	1.72	0	1	309	0	1	1.3	0	1	55	1	1
1	1	6	0	>70	2	1	0	0	0	0	0	0	0	0	0	0	0	0	0	0	0	0	0	0	0	80	2	1	94	0	1	37.0556	0	1	75.6667	0	1	1.44	0	1	440	0	1	1.1	0	1	17	0	1
1	1	4	0	>70	4	0	0	0	1	0	0	0	0	0	0	0	0	1	0	0	0	0	0	0	0	79	2	1	94	0	1	36.8889	0	1	80.3333	0	1	1.19	0	1	211	0	1	1.3	0	1	14	0	1
1	1	4	0	>70	11	1	0	0	0	0	0	1	0	0	0	1	1	0	0	0	0	0	0	0	0	76	2	1	83	1	1	36.9444	0	1	84.3333	0	1	12.74	1	1	62	2	1	3.8	1	1	105	1	1
1	1	7	0	>60	2	0	0	0	1	0	0	0	0	0	0	0	0	0	0	0	0	0	0	0	0	64	1	0	0	1	0	0	0	0	0	0	1	1.4	0	1	615	0	1	1.2	0	1	11	0	1
1	1	5	1	0-60	7	1	0	0	0	0	0	0	0	0	0	0	0	0	0	0	0	0	0	0	0	44	0	1	74	1	1	37	0	1	38.6667	1	1	20	1	1	290	0	1	1.2	1	1	62	1	1
1	1	2	0	>80	3	1	0	0	0	0	0	1	0	0	0	1	1	1	0	0	0	0	0	0	0	87	3	1	99	0	1	37.7222	0	1	78.6667	0	0	0	0	1	213	0	1	1.1	0	1	13	0	1
1	1	5	0	0-60	2	1	0	0	0	0	1	0	0	0	0	0	0	0	0	0	0	0	0	0	0	56	0	0	95	0	0	36.4444	0	1	82	0	0	0	0	0	207	0	0	1	0	1	32	1	1
1	1	17	0	>70	6	1	0	0	0	0	0	0	0	0	0	0	0	0	0	0	0	0	0	0	0	78	2	1	88	1	1	36.4444	0	1	87.3333	0	1	2.8	0	1	309	0	1	1.1	0	0	0	0	1
1	1	1	1	>80	6	1	0	0	0	0	0	0	0	0	1	0	0	1	1	1	0	0	0	0	0	86	3	1	99	0	0	0	0	0	0	0	0	0	0	1	155	0	0	0	0	1	152	1	1
1	1	5	0	>70	5	1	0	0	0	0	0	0	0	0	0	0	0	0	0	0	0	0	0	0	0	75	2	1	93	1	1	37.7222	0	1	67	0	1	0.69	0	1	259	0	1	1	0	1	32	1	1
1	1	6	0	>70	4	1	0	0	0	0	0	0	0	0	0	0	0	0	1	1	0	0	0	0	0	77	2	1	91	1	1	36.3333	0	1	76	0	1	0.44	0	1	270	0	1	11.7	0	1	53	1	1
1	1	2	0	0-60	1	1	0	0	0	0	0	1	0	0	0	0	0	1	1	0	0	1	0	0	0	31	0	1	95	0	1	36.9444	0	1	113.333	0	1	1.05	0	1	372	0	1	1	0	1	15	0	1
1	1	1	0	0-60	2	0	0	0	0	0	2	0	0	0	0	0	1	1	0	0	0	0	0	0	0	53	0	1	99	0	1	36.2778	0	1	113.333	0	1	2.86	0	1	214	0	1	1	0	1	80	1	1
1	1	17	0	0-60	0	0	0	0	1	0	0	0	1	0	0	0	0	0	1	1	0	0	0	1	0	58	0	1	100	0	1	37.3889	0	1	108.667	0	1	0	0	1	158	0	1	1	0	1	18	0	1
1	1	12	0	0-60	1	1	0	0	0	0	0	0	0	0	0	0	0	0	1	1	0	0	0	1	0	36	0	1	97	0	1	38.5	1	1	77.3333	0	1	0.33	0	1	156	0	1	1	0	1	12	0	1
1	1	3	0	0-60	0	0	0	0	1	0	0	1	0	0	0	0	0	1	0	0	0	0	0	0	0	51	0	1	94	0	1	37	0	1	108.333	0	0	0	0	1	166	0	1	1	0	1	13	0	1
1	1	14	0	>60	5	0	0	0	1	0	0	1	0	0	1	0	0	1	1	1	0	0	0	1	0	67	1	1	100	0	1	37.4444	0	1	75.6667	0	1	20	1	1	96	2	1	1.3	1	1	20	0	1
1	1	5	0	>80	8	1	0	0	0	0	0	0	0	0	0	0	0	0	0	0	0	0	0	0	0	83	3	1	95	0	1	38	0	1	90	0	1	3.64	1	1	196	0	1	1.2	1	1	42	1	1
1	1	4	0	>70	4	1	0	0	0	0	0	0	0	0	0	1	1	1	0	0	0	0	0	0	0	72	2	1	100	0	1	36.8889	0	1	85.6667	0	1	3.68	1	1	297	0	1	1	1	1	14	0	1
1	1	7	1	>70	5	0	0	0	1	0	0	1	0	0	0	1	1	1	0	0	0	0	0	0	0	79	2	1	82	1	1	37	0	1	111	0	1	0.59	0	1	155	0	1	1.1	0	1	14	0	1
1	1	2	1	0-60	0	0	0	0	1	0	0	0	0	0	0	0	0	1	1	0	1	0	0	0	0	48	0	1	98	0	1	36.5	0	1	137.667	0	0	0	0	1	174	0	0	0	0	1	7	0	1
1	0	0	0	>70	9	1	0	0	1	0	0	0	0	0	0	0	0	0	0	0	0	0	0	0	0	74	2	1	97	0	1	36.7778	0	1	101.667	0	1	5.68	1	1	18	2	1	1.5	1	1	48	1	1
1	1	5	0	0-60	3	1	0	0	0	0	0	0	0	0	0	0	0	0	0	0	0	0	0	0	0	57	0	1	96	0	1	36.6111	0	1	98	0	1	0.52	0	1	266	0	1	1.9	0	1	56	1	1
1	1	2	0	>80	4	1	0	0	0	0	0	1	1	1	0	1	1	1	0	0	0	0	0	0	0	81	3	1	97	0	1	37.1111	0	1	94	0	0	0	0	1	172	0	1	1.1	0	1	11	0	1
1	1	7	0	0-60	0	0	0	0	1	0	1	0	0	0	0	0	0	0	0	0	0	0	0	0	0	29	0	1	100	0	1	37.1667	0	1	107	0	1	1.9	0	1	380	0	0	0	0	1	5	0	1
1	1	7	0	0-60	2	0	0	0	1	0	0	0	0	0	0	0	0	0	0	0	0	0	0	0	0	49	0	1	94	0	1	37.6111	0	1	84	0	1	3.46	1	1	242	0	1	1.1	1	1	57	1	1
1	1	11	0	0-60	3	0	0	0	1	0	1	1	1	0	0	0	0	0	0	0	0	0	0	0	0	48	0	1	94	0	1	38.4444	1	1	91.3333	0	1	0.57	0	1	146	1	1	1	0	1	10	0	1
1	1	3	0	0-60	5	1	0	0	0	0	0	0	0	0	0	0	0	0	0	0	0	0	0	0	0	28	0	1	98	0	1	38.2778	1	1	75.3333	0	1	0.82	0	1	105	1	1	1	0	1	11	0	1
1	1	12	0	>80	4	1	0	0	0	0	0	0	0	0	0	0	0	0	0	0	0	0	0	0	0	81	3	1	100	0	1	37.2222	0	1	76.6667	0	0	0	0	1	151	0	1	1	0	1	20	0	1
1	1	8	1	>80	5	1	0	0	0	0	0	0	0	0	0	0	0	0	0	0	0	0	0	0	0	85	3	1	100	0	1	35.3333	0	1	90.6667	0	1	2.15	0	1	266	0	1	1	0	0	0	0	1
1	1	8	1	>70	7	0	0	0	1	0	1	0	0	0	0	0	0	0	1	1	0	0	0	0	0	75	2	1	93	1	1	38.0556	1	1	67	0	1	5.36	1	1	247	0	1	1.3	1	1	20	0	1
1	1	3	1	>80	8	0	0	0	1	0	0	0	0	0	0	0	0	0	0	0	0	0	0	0	0	87	3	1	90	1	1	38.1667	1	1	73.6667	0	1	2.61	0	1	149	1	1	1.1	0	1	30	0	1
1	1	4	0	0-60	2	0	1	0	0	0	0	0	0	1	0	1	1	1	0	0	0	0	0	0	0	58	0	1	94	0	1	37	0	1	70	0	1	1.78	0	1	99	2	1	1	0	1	6	0	1
1	1	3	0	0-60	2	0	1	0	0	0	0	0	0	0	0	0	0	0	0	0	0	0	0	0	0	55	0	1	93	1	1	38	0	1	99.6667	0	1	0.6	0	1	134	1	1	1.1	0	1	15	0	1
1	1	4	0	>60	5	0	0	0	1	1	0	0	0	0	0	0	1	0	1	1	0	0	0	1	0	67	1	1	98	0	1	36.7222	0	1	90.3333	0	1	3.61	1	1	165	0	1	1	1	1	55	1	1
1	0	0	0	>60	1	0	0	0	0	0	1	0	0	1	0	0	0	0	0	0	0	0	0	0	0	70	1	1	100	0	1	36.1667	0	1	89.3333	0	0	0	0	1	150	0	1	1	0	1	17	0	1
1	1	4	0	0-60	0	0	0	0	1	0	0	0	0	0	0	0	0	0	0	0	0	0	0	0	0	49	0	1	97	0	1	38.1111	1	1	100.667	0	0	0	0	1	199	0	0	0	0	1	16	0	1
1	1	1	0	0-60	1	1	0	0	0	0	0	0	0	0	0	1	1	1	0	0	0	0	0	0	0	22	0	1	100	0	1	36.9444	0	1	81.6667	0	0	0	0	1	582	0	0	0	0	1	7	0	1
1	1	4	0	>80	3	1	0	0	0	0	1	1	0	0	1	1	1	1	0	0	0	0	0	0	0	84	3	1	98	0	1	36.7222	0	1	95.6667	0	1	0.28	0	1	156	0	1	1	0	1	35	1	1
1	1	5	0	>60	4	0	1	0	0	0	0	0	0	0	0	1	1	1	1	0	0	0	0	0	1	68	1	1	88	1	1	36.5556	0	1	97.6667	0	1	3.87	1	1	172	0	1	1	1	1	28	0	1
1	1	6	0	>60	1	1	0	0	0	1	1	1	1	1	1	0	1	1	0	0	0	0	0	0	0	65	1	1	100	0	1	37	0	1	90.6667	0	0	0	0	1	159	0	0	0	0	1	7	0	1
1	1	3	0	0-60	1	0	0	0	1	1	1	1	1	0	0	0	1	0	0	0	0	0	0	0	0	51	0	1	94	0	1	37.2222	0	1	91.6667	0	0	0	0	1	233	0	1	1.2	0	1	13	0	1
1	1	2	0	0-60	0	1	0	0	0	0	0	0	0	0	0	0	0	0	0	0	0	0	0	0	0	53	0	1	98	0	1	37.9444	0	1	83.3333	0	1	0.64	0	1	405	0	1	1.1	0	1	11	0	1
1	1	14	1	>70	4	1	0	0	0	0	0	1	0	0	0	0	0	1	0	0	0	0	0	0	0	76	2	1	94	0	1	36.9444	0	1	54.6667	1	1	1.03	0	1	359	0	1	1	0	1	21	0	1
1	1	3	0	>60	2	0	0	0	1	0	0	0	0	0	0	0	0	0	0	0	0	0	0	0	0	66	1	1	91	1	1	37.1667	0	1	84.3333	0	1	2.38	0	1	407	0	1	1.1	0	1	12	0	1
1	1	4	0	>60	3	0	0	0	0	0	0	0	0	0	1	0	0	1	0	0	0	0	0	0	0	65	1	1	88	1	1	36.7222	0	1	94.6667	0	1	1.28	0	1	348	0	1	1.1	0	1	16	0	1
1	1	19	0	>60	7	1	0	0	0	0	0	0	0	0	0	0	0	0	0	0	0	0	0	0	0	68	1	1	99	0	1	37.1111	0	1	84.3333	0	1	6.99	1	1	214	0	1	1.3	1	1	72	1	1
1	1	3	0	>60	1	0	0	0	0	0	0	1	0	0	0	0	0	1	0	0	0	0	0	0	0	61	1	1	94	0	1	37.0556	0	1	93	0	0	0	0	1	209	0	0	0	0	1	9	0	1
1	1	6	1	>60	2	0	0	0	1	0	0	0	0	0	0	0	0	0	0	0	0	0	0	0	0	64	1	1	95	0	1	38.2222	1	1	88	0	0	0	0	1	142	1	1	1.1	0	1	23	0	1
1	1	7	0	>60	5	1	0	0	0	0	0	0	0	0	0	0	0	0	0	0	0	0	0	0	0	67	1	1	93	1	1	37.4444	0	1	108.667	0	1	3.88	1	1	190	0	1	1.2	1	1	130	1	1
1	1	31	1	>60	5	1	0	0	0	0	0	0	0	0	0	0	0	0	1	1	0	0	0	0	0	62	1	1	95	0	1	37.7222	0	1	79.6667	0	1	1.11	0	1	103	1	1	1.1	0	0	0	0	1
1	1	1	0	>70	4	0	0	0	1	0	0	0	0	0	0	0	0	0	0	0	0	0	0	0	0	76	2	1	95	0	1	36.3333	0	1	87.6667	0	1	1.5	0	1	209	0	1	1.2	0	1	13	0	1
1	1	3	0	0-60	0	1	0	0	0	0	0	0	0	0	0	0	0	0	0	0	0	0	0	0	0	21	0	1	100	0	1	37	0	1	81.6667	0	0	0	0	1	181	0	1	1	0	1	14	0	1
1	1	3	1	>60	7	1	0	0	0	0	0	0	0	0	0	0	0	0	0	0	0	0	0	0	0	63	1	1	88	1	1	37.6111	0	1	62	1	1	12.12	1	1	214	0	1	1.4	1	1	70	1	1
1	0	0	0	0-60	2	0	0	0	0	0	0	0	0	0	0	0	0	0	0	0	0	0	0	0	0	60	0	1	100	0	1	39.3889	1	1	78.6667	0	1	2.14	0	1	189	0	1	1	0	1	24	0	1
1	1	10	0	>70	4	0	0	0	1	0	0	0	1	0	0	0	0	0	0	0	0	0	0	0	0	77	2	1	90	1	1	39.1111	1	1	81.3333	0	1	1.48	0	1	193	0	0	0	0	1	18	0	1
1	1	14	1	>70	9	0	0	0	1	0	0	1	0	0	0	0	0	0	1	0	1	0	0	0	0	75	2	1	88	1	1	39.2222	1	1	72.6667	0	1	2.89	0	1	133	1	1	1.5	0	1	80	1	1
1	1	9	0	>80	5	0	0	0	1	0	0	0	0	0	0	0	0	0	1	1	0	0	1	0	0	85	3	1	96	0	1	38.2222	1	1	96.6667	0	1	5.24	1	1	284	0	1	1.1	1	1	24	0	1
1	1	3	0	0-60	2	1	0	0	0	0	0	1	1	1	0	0	0	1	0	0	0	0	0	0	0	56	0	1	94	0	1	39.0556	1	1	104.333	0	1	1.33	0	1	137	1	1	1.1	0	1	13	0	1
1	1	5	0	>60	5	0	0	0	0	0	0	0	0	0	0	0	0	0	0	0	0	0	0	0	0	62	1	1	89	1	1	37	0	1	78	0	0	0	0	1	135	1	1	1	0	1	11	0	1
1	1	4	1	>70	4	1	0	0	0	0	0	0	0	0	0	0	0	0	0	0	0	0	0	0	0	76	2	1	93	1	1	36.2222	0	1	107	0	0	0	0	1	222	0	1	1.1	0	1	32	1	1
1	1	3	0	0-60	3	1	0	0	0	0	0	0	0	1	0	0	0	0	0	0	0	0	0	0	0	53	0	1	90	1	1	36.6111	0	1	97	0	1	1.13	0	1	315	0	1	1.1	0	1	12	0	1
1	1	1	0	0-60	0	0	1	0	0	0	1	0	1	0	0	1	1	0	0	0	0	0	0	0	0	48	0	1	94	0	1	37	0	1	119	0	1	0.46	0	1	447	0	1	0.9	0	1	11	0	1
1	1	11	0	>70	3	0	0	1	0	0	0	0	1	0	0	0	0	0	1	1	0	0	0	0	0	71	2	1	100	0	1	36.6111	0	1	91.6667	0	1	7.13	1	1	281	0	1	1	1	1	34	1	1
1	1	5	1	0-60	3	1	0	0	0	0	0	0	0	0	0	0	0	0	0	0	0	0	0	0	0	56	0	1	94	0	1	38.3333	1	1	51.6667	1	1	0.78	0	1	236	0	1	1	0	1	33	1	1
1	1	4	1	>60	3	0	0	0	0	0	0	0	0	0	0	0	0	0	0	0	0	0	0	0	0	64	1	1	89	1	1	37	0	1	111.667	0	1	1.34	0	1	186	0	1	1	0	1	28	0	1
1	1	4	0	0-60	1	1	0	0	0	0	0	0	0	0	0	0	0	0	0	0	0	0	0	0	0	58	0	1	96	0	1	38	0	1	84	0	1	0.48	0	1	227	0	1	1	0	1	9	0	1
1	1	32	0	0-60	3	1	0	0	0	0	0	0	0	0	0	0	0	0	0	0	0	0	0	0	0	53	0	1	96	0	1	37.1667	0	1	100	0	1	8.57	1	1	136	1	1	1.1	1	1	14	0	1
1	1	28	0	>60	6	0	1	0	0	0	0	0	0	0	0	0	0	0	1	1	0	0	0	1	0	65	1	1	100	0	1	38.1111	1	1	85	0	1	17.81	1	1	141	1	1	1.4	1	1	40	1	1
1	1	4	0	0-60	2	0	0	0	0	0	0	0	0	0	0	0	0	0	0	0	0	0	0	0	0	28	0	1	98	0	1	38.8889	1	1	84	0	0	0	0	1	144	1	1	1	0	1	10	0	1
1	1	3	0	>70	2	0	0	0	1	0	0	0	0	0	0	0	0	0	0	0	0	0	0	0	0	75	2	1	99	0	1	36.9444	0	1	94	0	1	0.81	0	1	181	0	1	1	0	1	38	1	1
1	1	5	1	0-60	2	0	0	0	1	0	0	1	0	0	0	1	1	0	0	0	0	0	0	0	0	40	0	1	98	0	1	38.8333	1	1	87.6667	0	0	0	0	1	159	0	0	0	0	1	38	1	1
1	1	15	0	0-60	2	0	0	0	1	1	1	1	1	0	0	1	1	1	0	0	0	0	0	0	0	53	0	1	99	0	1	39.1667	1	1	90.6667	0	1	3.2	1	1	192	0	1	1	1	1	22	0	1
1	1	7	0	>60	2	0	0	0	1	0	0	0	1	0	0	1	1	0	0	0	0	0	0	0	0	67	1	1	78	1	1	36.3333	0	1	81.3333	0	1	0.68	0	1	349	0	1	1	0	1	31	1	1
1	1	10	1	>80	8	1	0	0	0	0	0	0	1	1	0	0	0	0	0	0	0	0	0	0	0	97	3	1	76	1	1	38.2222	1	1	46	1	1	5.5	1	1	154	0	1	1	1	1	11	0	1
1	1	5	0	>70	5	0	0	0	0	0	0	0	0	0	0	0	0	0	0	0	0	0	0	0	0	71	2	1	85	1	1	36.8889	0	1	102	0	1	1.25	0	1	288	0	0	0	0	1	29	0	1
1	1	5	0	>80	5	1	0	0	0	0	0	0	0	0	0	0	0	0	0	0	0	0	0	0	0	89	3	1	98	0	1	36.4444	0	1	91	0	1	2.05	0	1	310	0	1	1.1	0	1	89	1	1
1	1	14	0	0-60	1	0	0	0	0	0	0	0	0	0	0	0	0	0	0	0	0	0	0	0	0	53	0	1	95	0	1	37.1667	0	1	105.333	0	1	0.65	0	1	153	0	1	1.1	0	1	15	0	1
1	1	6	0	>80	6	1	0	0	0	0	0	0	0	0	0	0	0	0	0	0	0	0	0	0	0	85	3	1	84	1	1	38.2778	1	1	104.333	0	1	6.79	1	1	414	0	1	1.2	1	1	50	1	1
1	1	4	0	>60	1	0	1	0	0	0	0	0	0	0	0	0	0	0	0	0	0	0	0	0	0	61	1	1	100	0	1	38.3333	1	1	106.333	0	1	0.73	0	1	170	0	1	1.1	0	1	14	0	1
1	1	1	0	0-60	0	1	0	0	0	0	0	0	1	0	0	0	0	0	1	0	1	0	0	0	0	43	0	1	100	0	1	36.8889	0	1	82.6667	0	1	0.6	0	1	731	0	1	1.1	0	1	6	0	1
1	1	2	0	0-60	1	0	0	0	1	0	0	0	0	0	0	0	0	0	0	0	0	0	0	0	0	54	0	1	96	0	1	36.3333	0	1	80.3333	0	1	0.26999	0	1	274	0	1	2.7	0	1	12	0	1
1	1	12	1	>60	5	0	0	0	1	0	0	0	0	0	0	0	0	0	0	0	0	0	0	0	0	67	1	1	82	1	1	37	0	1	63	0	1	20	1	1	225	0	1	1.4	1	1	22	0	1
1	1	5	0	0-60	0	0	0	0	0	0	0	0	0	0	0	0	0	0	0	0	0	0	0	0	0	54	0	1	97	0	1	37.1111	0	1	78.6667	0	1	0.53	0	1	252	0	1	1	0	1	8	0	1
1	1	3	1	>80	7	0	0	0	1	0	0	0	0	0	0	0	0	0	0	0	0	0	0	0	0	83	3	1	89	1	1	38.2778	1	1	105.333	0	1	2.25	0	1	191	0	1	1.3	0	1	46	1	1
1	1	5	1	0-60	4	0	0	0	0	0	0	0	0	0	0	0	0	0	0	0	0	0	0	0	0	35	0	1	94	0	1	37.3333	0	1	39	1	1	3.92	1	1	256	0	1	1.1	1	0	0	0	1
1	1	21	1	>70	5	0	0	0	1	0	1	1	1	0	0	1	1	1	0	0	0	0	0	0	0	77	2	1	98	0	1	36.7778	0	1	81.3333	0	1	9.98	1	1	178	0	1	1.1	1	0	0	0	1
1	1	4	1	>60	7	0	0	0	1	0	0	0	1	0	0	0	0	1	0	0	0	0	0	0	0	66	1	1	77	1	1	40	1	1	59	1	1	20	1	1	357	0	1	1.2	1	1	71	1	1
1	1	16	0	0-60	2	0	0	0	0	0	1	0	0	0	0	0	0	0	0	0	0	0	0	0	0	47	0	1	96	0	1	36.6667	0	1	70.6667	0	1	3.17	1	1	331	0	1	1.1	1	1	7	0	1
1	1	2	0	0-60	3	1	0	0	0	0	0	0	0	0	0	0	0	0	0	0	0	0	0	0	0	60	0	1	91	1	1	37.6667	0	1	90.6667	0	1	2.02	0	1	262	0	1	1.1	0	1	21	0	1
1	1	1	0	>70	4	0	1	0	0	0	0	0	0	0	0	0	0	0	0	0	0	0	0	0	0	73	2	1	97	0	1	36.3889	0	1	81	0	1	2.41	0	1	114	1	1	1.2	0	0	0	0	1
1	1	2	0	>60	4	0	0	0	1	0	0	0	0	0	0	0	0	1	1	1	0	0	0	1	0	65	1	1	99	0	1	36.6111	0	1	76.6667	0	1	1.17	0	1	34	2	1	1.6	0	1	32	1	1
1	1	1	1	>70	5	0	1	0	0	0	0	0	0	0	0	0	0	0	0	0	0	0	0	0	0	73	2	1	98	0	1	37.2222	0	1	70.6667	0	0	0	0	1	167	0	0	0	0	1	190	1	1
1	1	6	1	>70	6	0	0	0	1	0	0	0	0	0	0	0	0	0	0	0	0	0	0	0	0	80	2	1	86	1	1	36.5	0	1	92	0	1	3.5	1	1	275	0	1	0.9	1	0	0	0	1
1	1	2	0	0-60	2	1	0	0	0	0	0	0	0	0	0	0	0	0	0	0	0	0	0	0	0	50	0	1	98	0	1	36.0556	0	1	102.333	0	1	5.36	1	1	180	0	1	0.9	1	1	66	1	1
1	1	12	0	>80	8	1	0	0	0	0	0	0	0	0	0	0	0	0	0	0	0	0	0	0	0	82	3	1	100	0	1	34.2222	0	1	78.6667	0	1	16.68	1	1	232	0	1	1.4	1	1	52	1	1
1	1	1	1	>80	11	0	1	0	0	0	0	0	0	0	0	0	0	0	0	0	0	0	0	0	0	84	3	1	85	1	1	36.5556	0	1	57	1	1	7.81	1	1	235	0	1	1.4	1	1	102	1	1
1	1	8	0	0-60	2	0	0	0	0	0	0	0	1	0	0	0	0	0	0	0	0	0	0	0	0	31	0	1	94	0	1	37	0	1	92.3333	0	1	1.04	0	1	103	1	1	1	0	1	11	0	1
1	1	11	0	>60	2	0	0	0	1	0	0	0	0	0	0	0	0	0	0	0	0	0	0	0	0	65	1	1	98	0	1	38.6667	1	1	65	0	0	0	0	1	157	0	1	1	0	1	11	0	1
1	1	8	1	>70	5	0	0	0	1	0	0	0	0	0	0	0	0	0	0	0	0	0	0	0	0	73	2	1	100	0	1	38.4444	1	1	104.333	0	0	0	0	1	157	0	1	1	0	1	91	1	1
1	1	6	1	>60	5	1	0	0	0	0	0	0	0	0	0	0	0	0	0	0	0	0	0	0	0	69	1	1	85	1	1	38.6667	1	1	87.6667	0	0	0	0	1	144	1	1	1	0	1	22	0	1
1	1	4	1	>60	3	0	0	0	1	0	0	0	0	0	1	0	0	1	0	0	0	0	0	0	0	66	1	1	95	0	1	37.7222	0	1	89.3333	0	1	2.94	0	1	264	0	1	1.3	0	1	18	0	1
1	1	3	0	>60	2	1	0	0	0	0	0	0	1	0	0	0	0	0	0	0	0	0	0	0	0	62	1	0	0	1	1	-17.7778	0	1	102.333	0	0	0	0	0	0	0	0	0	0	0	0	0	0
1	1	8	1	>70	5	0	0	0	1	0	0	1	1	0	0	0	0	1	0	0	0	0	0	0	0	71	2	1	96	0	1	37.0556	0	1	96.6667	0	1	1.49	0	1	151	0	1	0.9	0	1	18	0	1
1	1	3	0	>80	8	1	0	0	0	0	0	0	0	0	0	0	0	0	0	0	0	0	0	0	0	86	3	1	98	0	1	36.6667	0	1	94	0	1	7.48	1	1	125	1	1	1.1	1	1	53	1	1
1	1	7	1	>70	5	0	1	0	0	0	0	1	0	0	0	0	0	1	0	0	0	0	0	0	0	71	2	1	80	1	1	37.0556	0	1	109.667	0	1	1.08	0	1	142	1	1	1.1	0	1	16	0	1
1	1	1	0	0-60	0	0	0	0	1	0	0	0	0	0	0	0	0	0	0	0	0	0	0	0	0	51	0	1	99	0	1	37.7222	0	1	109.333	0	0	0	0	1	173	0	1	1	0	1	10	0	1
1	0	0	0	>70	4	1	0	0	0	0	0	0	0	0	0	0	0	1	0	0	0	0	0	0	0	80	2	1	97	0	1	37.6111	0	1	80.6667	0	1	2.54	0	1	161	0	1	1.3	0	1	15	0	1
1	1	8	0	>60	3	0	1	0	0	0	0	0	0	0	0	0	0	0	0	0	0	0	0	0	0	65	1	1	80	1	1	36.9444	0	1	81.3333	0	1	2.85	0	1	196	0	1	1.2	0	1	62	1	1
1	1	3	0	>70	3	0	0	0	0	0	0	0	0	0	0	0	0	0	0	0	0	0	0	0	0	74	2	1	100	0	1	37.5556	0	1	86.3333	0	0	0	0	1	113	1	0	0	0	1	18	0	1
1	1	9	0	>60	1	0	1	0	0	0	0	0	0	0	0	0	0	0	0	0	0	0	0	0	0	63	1	1	99	0	1	36.4444	0	1	99.6667	0	1	1.81	0	1	228	0	1	1	0	1	18	0	1
1	1	17	1	0-60	2	1	0	0	0	0	0	0	0	0	0	0	0	0	1	1	0	0	0	0	0	47	0	0	98	0	0	33.7778	0	1	80.3333	0	0	1.69	0	0	77	0	0	1.3	0	0	0	0	1
1	1	6	1	>70	4	0	0	0	0	0	0	0	0	0	0	0	0	0	0	0	0	0	0	0	0	80	2	1	97	0	1	38.8333	1	1	57.6667	1	1	1.87	0	1	168	0	1	1	0	1	39	1	1
1	1	13	0	>70	5	1	0	0	0	0	1	0	0	0	0	0	0	0	0	0	0	0	0	0	0	72	2	1	96	0	1	36.4444	0	1	81.6667	0	1	14.45	1	1	457	0	1	1.2	1	1	98	1	1
1	1	5	1	>60	5	0	0	0	1	0	0	0	0	0	0	0	0	0	0	0	0	0	0	0	0	68	1	1	77	1	1	36.8889	0	1	56	1	1	0.75	0	1	147	1	1	0.9	0	0	0	0	1
1	1	42	1	>60	9	0	0	0	1	0	0	0	0	0	1	0	0	0	1	1	0	0	0	1	0	64	1	1	90	1	1	38.4444	1	1	58.3333	1	1	5.3	1	1	76	2	1	1	1	1	47	1	1
1	1	21	1	>80	9	0	0	0	1	0	0	0	0	1	0	0	0	0	1	1	0	0	0	1	0	86	3	1	94	0	1	39.1111	1	1	82.6667	0	1	1.46	0	1	147	1	1	1.4	0	1	74	1	1
1	1	2	0	0-60	2	0	0	0	1	0	0	0	0	0	0	0	0	0	0	0	0	0	0	0	0	58	0	1	94	0	1	38.4444	1	1	76	0	1	1.29	0	1	249	0	1	1.1	0	1	7	0	1
1	1	3	1	>80	6	1	0	0	0	0	0	0	1	0	0	1	1	0	0	0	0	0	0	0	0	84	3	1	88	1	1	36.6111	0	1	92.6667	0	0	0	0	1	148	1	1	1.1	0	1	43	1	1
1	1	1	1	0-60	2	1	0	0	0	1	1	1	1	0	1	0	1	1	0	0	0	0	0	0	0	49	0	1	70	1	1	38	0	1	88	0	0	0	0	1	193	0	1	1.1	0	1	12	0	1
1	1	3	0	0-60	0	0	0	0	1	0	1	0	0	0	0	0	1	1	0	0	0	0	0	0	0	52	0	1	99	0	1	37.0556	0	1	91.6667	0	0	0	0	1	416	0	1	1	0	1	5	0	1
1	1	6	1	0-60	5	0	0	0	1	0	0	0	0	0	1	0	0	1	0	0	0	0	0	0	0	60	0	1	93	1	1	36.6667	0	1	35.6667	1	0	0	0	1	155	0	1	1.1	0	1	17	0	1
1	1	8	0	0-60	4	1	0	0	0	0	0	0	0	0	0	0	0	1	0	0	0	0	0	0	0	58	0	1	93	1	1	38.1111	1	1	92.6667	0	0	0	0	1	96	2	1	1.1	0	1	24	0	1
1	1	15	0	>60	4	1	0	0	0	0	0	0	0	0	0	0	0	1	0	0	0	0	0	0	0	64	1	1	91	1	1	39.0556	1	1	102.667	0	1	1.44	0	1	218	0	1	1	0	1	14	0	1
1	1	25	0	0-60	3	1	0	0	0	0	0	0	0	0	0	0	0	0	0	0	0	0	0	0	0	43	0	1	92	1	1	37.0556	0	1	89	0	1	0.33	0	1	25	2	1	1	0	1	12	0	1
1	1	3	0	0-60	0	0	0	1	0	0	0	0	0	0	0	0	0	0	0	0	0	0	0	0	0	52	0	1	99	0	1	36.7222	0	1	90.3333	0	1	0.8	0	1	529	0	1	1	0	1	5	0	1
1	1	4	1	>70	8	0	0	0	1	0	0	0	0	0	0	0	0	0	0	0	0	0	0	0	0	78	2	1	83	1	1	36.7778	0	1	28	1	1	20	1	1	147	1	1	1.1	1	1	30	0	1
1	1	31	0	>60	2	0	0	0	1	0	0	0	0	0	0	0	0	0	0	0	0	0	0	0	0	64	1	1	83	1	1	37.5556	0	1	96.6667	0	1	0.81	0	1	192	0	1	1.1	0	1	17	0	1
1	1	5	0	0-60	1	0	0	0	1	0	0	0	0	0	0	0	0	0	0	0	0	0	0	0	0	53	0	1	94	0	1	37.5	0	1	105.667	0	0	0	0	1	191	0	0	0	0	1	13	0	1
1	1	5	0	>60	1	0	0	0	1	0	0	0	0	0	0	0	0	0	0	0	0	0	0	0	0	62	1	1	98	0	1	37.0556	0	1	106.333	0	1	2.03	0	1	425	0	1	0.9	0	0	0	0	1
1	1	3	0	0-60	0	0	0	0	1	0	0	0	0	0	0	0	0	0	0	0	0	0	0	0	0	45	0	1	100	0	1	37.1667	0	1	75	0	0	0	0	1	312	0	1	1.1	0	1	10	0	1
1	1	2	0	0-60	2	0	0	0	1	0	0	0	0	0	0	0	0	0	0	0	0	0	0	0	0	48	0	1	92	1	1	37.8889	0	1	84	0	1	0.44	0	1	173	0	0	0	0	1	7	0	1
1	1	2	0	>70	3	0	0	0	1	0	0	0	0	0	0	0	0	0	0	0	0	0	0	0	0	80	2	1	92	1	1	37.3889	0	1	91	0	1	0.66	0	1	213	0	1	1.1	0	1	14	0	1
1	1	4	0	>70	3	0	0	0	1	0	0	0	0	0	0	0	0	0	0	0	0	0	0	0	0	77	2	1	98	0	1	36.7222	0	1	95.6667	0	1	0.9	0	1	345	0	1	1	0	1	7	0	1
1	1	5	0	0-60	2	0	0	0	1	0	0	0	0	0	0	0	0	0	0	0	0	0	0	0	0	49	0	1	93	1	1	37.3333	0	1	90.6667	0	1	1.24	0	1	215	0	1	1	0	1	16	0	1
1	1	12	0	0-60	0	0	0	0	0	0	0	0	0	0	0	0	0	0	0	0	0	0	0	0	0	51	0	1	100	0	1	37.2778	0	1	71	0	1	0.26999	0	1	187	0	1	1	0	0	0	0	1
1	1	45	0	>60	5	1	0	0	0	0	0	0	0	0	0	0	0	0	1	1	0	0	0	1	0	63	1	1	97	0	1	37.1667	0	1	94.6667	0	1	1.51	0	1	84	2	1	1	0	0	0	0	1
1	1	7	0	>60	3	0	0	0	0	0	0	0	0	0	0	0	0	0	0	0	0	0	0	0	0	61	1	1	95	0	1	39.3333	1	1	105.667	0	0	0	0	1	182	0	1	1	0	1	13	0	1
1	0	0	0	0-60	0	0	0	0	1	0	0	0	0	0	0	0	0	0	1	1	0	0	0	1	0	49	0	1	100	0	1	35.9444	0	1	76.3333	0	0	0	0	1	239	0	0	0	0	1	4.999	0	1
1	1	10	0	>80	5	1	0	0	0	0	0	0	0	0	0	0	0	0	1	1	0	0	0	0	0	92	3	1	100	0	1	37.7222	0	1	84.3333	0	1	1.21	0	1	460	0	1	1.9	0	1	150	1	1
1	1	18	0	>70	5	1	0	0	0	0	0	0	0	0	0	0	0	0	0	0	0	0	0	0	0	78	2	1	97	0	1	36.5	0	1	73.6667	0	1	6.44	1	1	236	0	1	1.2	1	1	140	1	1
1	1	9	0	>80	4	0	0	0	1	0	0	0	0	0	0	0	0	0	0	0	0	0	0	0	0	90	3	1	96	0	1	37	0	1	86.3333	0	1	3.09	1	1	393	0	1	1.1	1	1	15	0	1
1	1	2	0	0-60	2	0	0	0	1	0	1	0	0	0	0	0	0	0	0	0	0	0	0	0	0	46	0	1	96	0	1	39.7778	1	1	77.3333	0	1	0.98	0	1	216	0	1	1.1	0	1	10	0	1
1	1	8	1	>60	7	0	1	0	0	0	0	0	1	0	0	1	1	0	0	0	0	0	0	0	0	69	1	1	94	0	1	37.8333	0	1	81.6667	0	1	4.94	1	1	61	2	1	1.4	1	1	81	1	1
1	1	4	0	0-60	0	1	0	0	0	0	0	0	0	0	0	0	0	0	1	1	0	0	0	1	0	32	0	1	98	0	1	37.5556	0	1	85	0	1	0.56	0	1	249	0	1	1	0	1	5	0	1
1	1	3	0	>70	2	0	0	0	1	0	0	0	0	0	0	0	0	0	1	1	0	0	1	0	0	75	2	1	99	0	1	36.6667	0	1	77	0	1	0.43	0	1	170	0	1	1	0	1	11	0	1
1	1	6	0	>80	3	1	0	0	0	0	0	0	0	0	0	0	0	0	0	0	0	0	0	0	0	81	3	1	96	0	1	39.5	1	1	95	0	0	0	0	1	303	0	0	0	0	1	50	1	1
1	1	2	0	>70	4	0	0	0	1	0	1	0	1	0	0	0	0	0	1	1	0	0	0	0	0	75	2	1	100	0	1	37	0	1	73.6667	0	0	0	0	1	180	0	1	1.5	0	1	16	0	1
1	1	12	0	0-60	5	1	0	0	0	0	0	0	0	0	1	0	0	0	0	0	0	0	0	0	0	38	0	1	95	0	1	38	0	1	84.3333	0	1	2.92	0	1	127	1	1	1.1	0	1	32	1	1
1	1	3	1	>80	6	1	0	0	0	0	0	0	0	0	0	0	0	0	0	0	0	0	0	0	0	91	3	1	100	0	1	36.8889	0	1	128.333	0	1	5.93	1	1	174	0	1	1.2	1	1	21	0	1
1	1	9	1	0-60	5	1	0	0	0	0	0	0	0	0	0	0	0	0	0	0	0	0	0	0	0	57	0	1	100	0	1	36.6111	0	1	71	0	1	20	1	1	184	0	1	7	1	0	0	0	1
1	1	3	0	0-60	0	1	0	0	0	0	0	0	0	0	0	0	0	0	0	0	0	0	0	0	0	60	0	1	94	0	1	36.7222	0	1	77	0	1	0.58	0	1	153	0	1	1	0	1	15	0	1
1	1	6	0	>80	7	1	0	0	0	0	0	0	0	0	0	0	0	0	0	0	0	0	0	0	0	84	3	1	92	1	1	36.7778	0	1	82.3333	0	1	0.49	0	1	464	0	1	1.9	0	1	31	1	1
1	1	12	0	0-60	0	1	0	0	0	0	0	0	0	0	0	0	0	0	0	0	0	0	0	0	0	34	0	1	100	0	1	36.1111	0	1	94.3333	0	1	0	0	1	309	0	0	0	0	1	11	0	1
1	1	18	1	>60	5	1	0	0	0	0	0	0	0	0	1	0	0	1	1	1	0	0	0	1	0	70	1	1	100	0	1	38.1111	1	1	67.6667	0	1	0.53	0	1	191	0	1	2.2	0	1	36	1	1
1	1	1	0	>70	2	0	0	0	1	0	1	0	0	0	0	1	1	0	0	0	0	0	0	0	0	79	2	1	96	0	1	37.1111	0	1	97.3333	0	1	1.92	0	1	309	0	1	1.1	0	1	9	0	1
1	1	13	1	>70	6	0	0	0	1	0	0	0	0	0	0	0	0	0	0	0	0	0	0	0	0	78	2	1	100	0	1	36.4444	0	1	30.6667	1	1	0.58	0	1	77	2	1	1.4	0	0	0	0	1
1	1	6	0	>70	2	0	0	0	1	0	0	0	0	0	0	0	0	0	0	0	0	0	0	0	0	79	2	1	95	0	1	37.6667	0	1	76	0	1	0.55	0	1	197	0	1	1.2	0	1	14	0	1
1	1	6	0	0-60	2	0	0	0	0	0	0	0	1	1	0	0	0	0	0	0	0	0	0	0	0	57	0	0	0	1	1	-17.7778	0	1	94.6667	0	1	0.54	0	1	532	0	1	1.4	0	1	30	0	1
1	0	0	0	0-60	4	1	0	0	0	0	0	0	0	0	0	0	0	0	0	0	0	0	0	0	0	52	0	1	96	0	1	36.6667	0	1	76.3333	0	1	3.32	1	1	232	0	1	1.3	1	1	13	0	1
1	1	5	0	0-60	0	0	0	0	0	0	0	0	0	0	0	0	0	0	0	0	0	0	0	0	0	57	0	1	95	0	1	37.0556	0	1	81.3333	0	1	0.78	0	1	213	0	1	1	0	1	10	0	1
1	1	5	1	>60	2	1	0	0	0	0	0	0	0	0	0	0	0	0	0	0	0	0	0	0	0	70	1	0	0	1	1	-17.7778	0	0	0	0	0	0	0	0	0	0	0	0	0	0	0	0	0
1	1	2	0	0-60	1	0	0	0	0	1	1	1	0	0	0	1	1	1	0	0	0	0	0	0	0	57	0	1	96	0	1	37.3889	0	1	76.6667	0	1	0.77	0	1	156	0	1	1	0	1	11	0	1
1	1	20	1	0-60	4	0	0	1	0	0	0	1	0	0	0	0	0	0	0	0	0	0	0	0	0	30	0	1	97	0	1	38.8333	1	1	46.6667	1	1	3.09	1	1	280	0	1	1	1	0	0	0	1
1	0	0	0	0-60	3	0	0	0	1	0	0	0	0	0	0	0	0	0	0	0	0	0	0	0	0	60	0	1	76	1	1	38.7222	1	1	80	0	1	1.5	0	1	279	0	1	1	0	1	18	0	1
1	1	3	1	>80	8	1	0	0	0	1	0	1	1	0	0	0	1	1	0	0	0	0	0	0	0	91	3	1	100	0	1	39.5556	1	1	92.6667	0	1	15.58	1	1	223	0	1	1.1	1	1	51	1	1
1	1	13	0	0-60	2	1	0	0	0	0	0	0	0	0	0	0	0	0	0	0	0	0	0	0	0	60	0	1	90	1	1	37.4444	0	1	94.6667	0	1	0.92	0	1	160	0	0	0	0	1	12	0	1
1	1	2	0	0-60	1	1	0	0	0	0	1	0	0	0	0	0	0	0	0	0	0	0	0	0	0	51	0	1	98	0	1	37.4444	0	1	98	0	1	19.88	1	1	293	0	1	1	1	1	14	0	1
1	1	31	0	>70	7	0	0	0	0	0	0	0	0	0	0	0	0	0	0	0	0	0	0	0	0	71	2	1	90	1	1	36.8889	0	1	94.6667	0	1	20	1	1	310	0	1	1.3	1	1	27	0	1
1	1	3	0	0-60	1	1	0	0	0	0	1	0	0	0	0	0	0	0	0	0	0	0	0	0	0	44	0	0	0	1	1	-17.7778	0	1	83.3333	0	0	0	0	0	0	0	0	0	0	0	0	0	0
1	1	4	1	>70	9	0	0	0	1	0	0	0	0	0	0	0	0	0	0	0	0	0	0	0	0	80	2	1	89	1	1	36.5	0	1	105.667	0	1	12.25	1	1	164	0	1	1.5	1	1	115	1	1
1	1	20	1	>80	7	0	1	0	0	0	1	0	0	0	0	1	1	1	0	0	0	0	0	0	0	86	3	1	88	1	1	36.9444	0	1	88	0	1	18.16	1	1	305	0	1	0.9	1	1	12	0	1
1	1	8	0	>70	4	0	0	0	1	0	0	0	0	0	0	0	0	0	0	0	0	0	0	0	0	72	2	1	92	1	1	38.3333	1	1	87.6667	0	1	0.89	0	1	159	0	1	0.9	0	0	0	0	1
1	1	9	1	>60	3	0	0	0	1	0	0	0	0	0	0	0	0	1	0	0	0	0	0	0	0	65	1	1	93	1	1	38.7222	1	1	89.6667	0	1	2.26	0	1	130	1	1	1	0	1	53	1	1
1	1	3	0	0-60	0	0	0	0	1	0	0	0	0	0	0	0	0	0	1	0	0	0	1	0	1	50	0	1	98	0	1	37.7222	0	1	89	0	1	0.52	0	1	314	0	1	1	0	1	7	0	1
1	0	0	0	>60	3	0	0	0	1	0	0	0	0	0	0	0	0	0	0	0	0	0	0	0	0	61	1	1	96	0	1	37	0	1	96.3333	0	1	14.74	1	1	179	0	0	0	1	1	73	1	1
1	1	9	0	>70	6	1	0	0	0	0	0	0	0	0	0	0	0	1	0	0	0	0	0	0	0	75	2	1	86	1	1	37.6667	0	1	77	0	1	20	1	1	264	0	1	1.2	1	1	12	0	1
1	1	6	1	>80	7	0	0	0	1	0	0	0	0	0	0	0	0	0	0	0	0	0	0	0	0	88	3	1	99	0	1	36.3333	0	1	44.3333	1	1	20	1	1	151	0	1	2	1	1	79	1	1
1	1	4	1	>60	3	0	0	0	0	0	0	1	0	0	0	0	0	0	0	0	0	0	0	0	0	68	1	1	90	1	1	37.3889	0	1	47.6667	1	0	0	0	1	251	0	1	1.1	0	1	46	1	1
1	1	3	0	0-60	0	1	0	0	0	1	0	1	0	1	0	0	1	1	0	0	0	0	0	0	0	57	0	1	98	0	1	37.2778	0	1	106.333	0	1	0.59	0	1	188	0	1	1	0	1	11	0	1
1	1	7	0	>60	5	1	0	0	0	0	0	0	0	0	0	0	0	0	0	0	0	0	0	0	0	67	1	1	96	0	1	36.5	0	1	95.6667	0	1	12.59	1	1	362	0	1	1.6	1	1	32	1	1
1	1	4	0	>60	3	0	0	0	0	0	0	0	0	0	0	0	0	0	0	0	0	0	0	0	0	66	1	1	93	1	1	37.1111	0	1	82	0	1	1.56	0	1	418	0	1	1.2	0	1	9	0	1
1	1	34	1	>60	5	1	0	0	0	0	0	0	0	0	0	0	0	0	0	0	0	0	0	0	0	68	1	1	54	1	1	39.1667	1	1	88.3333	0	1	20	1	1	302	0	1	1	1	0	0	0	1
1	0	0	0	0-60	0	0	0	0	1	0	1	0	0	0	0	0	0	0	0	0	0	0	0	0	0	54	0	1	96	0	1	36.7778	0	1	89	0	1	0.73	0	1	339	0	1	1.1	0	1	5	0	1
1	1	4	0	>80	4	1	0	0	0	0	0	0	0	0	0	0	0	0	0	0	0	0	0	0	0	83	3	0	0	1	0	0	0	0	0	0	0	0	0	0	0	0	0	0	0	0	0	0	0
1	1	8	0	>80	6	1	0	0	0	0	0	1	0	0	1	0	0	0	0	0	0	0	0	0	0	82	3	1	88	1	1	36.7222	0	1	85.6667	0	0	0	0	1	191	0	1	1	0	1	24	0	1
1	1	13	0	0-60	2	0	0	0	1	0	0	1	0	0	0	0	0	1	0	0	0	0	0	0	0	60	0	1	94	0	1	37.5556	0	1	86	0	1	1.6	0	1	103	1	1	1.2	0	1	15	0	1
1	1	18	1	>60	5	0	0	1	0	0	0	0	0	0	0	0	0	1	0	0	0	0	0	0	0	62	1	1	98	0	1	38.6111	1	1	80.6667	0	1	14.42	1	1	124	1	1	1.2	1	1	20	0	1
1	1	4	1	>60	4	0	0	0	1	0	0	0	0	1	0	1	1	1	0	0	0	0	0	0	0	70	1	1	97	0	1	36.6667	0	1	82.3333	0	0	0	0	1	154	0	0	0	0	1	36	1	1
1	1	3	1	>70	8	1	0	0	0	0	0	0	0	0	0	0	0	0	0	0	0	0	0	0	0	74	2	1	89	1	1	39.3889	1	0	0	0	1	1.48	0	1	189	0	1	1.3	0	1	61	1	1
1	1	3	1	>80	4	0	0	0	1	0	1	0	1	1	0	0	0	0	0	0	0	0	0	0	0	83	3	1	96	0	1	38.1111	1	1	106.667	0	0	0	0	1	157	0	1	1	0	1	27	0	1
1	1	5	0	>70	5	0	0	0	0	0	0	0	0	0	0	0	0	0	1	1	0	0	1	0	0	71	2	1	99	0	1	37.4444	0	1	76.3333	0	1	0.3	0	1	140	1	1	8.9	0	1	33	1	1
1	1	2	0	0-60	1	1	0	0	0	0	0	0	0	0	0	0	0	0	0	0	0	0	0	0	0	46	0	1	92	1	1	38.1667	1	1	97.6667	0	0	0	0	1	197	0	1	1	0	1	9	0	1
1	1	3	0	>70	2	0	0	0	1	0	0	0	0	0	0	0	0	0	0	0	0	0	0	0	0	74	2	1	98	0	1	36.8889	0	1	101.333	0	1	0.43	0	1	252	0	1	1.1	0	1	13	0	1
1	1	13	0	0-60	6	1	0	0	0	0	0	1	0	0	0	1	1	1	0	0	0	0	0	0	0	59	0	1	53	1	1	38.1111	1	1	106.333	0	1	3.33	1	1	191	0	1	1.1	1	0	0	0	1
1	1	4	1	>80	5	1	0	0	0	0	0	0	0	0	0	0	0	0	0	0	0	0	0	0	0	91	3	1	92	1	1	37.3333	0	1	81.3333	0	1	1.75	0	1	223	0	1	1.2	0	1	21	0	1
1	1	2	0	0-60	1	0	0	0	1	0	0	0	0	0	0	0	0	0	1	1	0	0	1	0	0	56	0	1	95	0	1	39	1	1	68	0	0	0	0	1	392	0	1	1	0	1	11	0	1
1	1	9	0	0-60	2	1	0	0	0	0	0	0	0	0	0	0	0	0	0	0	0	0	0	0	0	60	0	1	86	1	1	37.2778	0	1	70.6667	0	1	1.94	0	1	204	0	1	1.1	0	1	24	0	1
1	1	12	1	>60	8	1	0	0	0	0	0	0	0	0	0	0	0	0	0	0	0	0	0	0	0	69	1	1	92	1	1	36.6667	0	1	40	1	1	1.54	0	1	220	0	1	4.3	0	1	60	1	1
1	1	5	0	0-60	2	1	0	0	0	1	1	1	0	0	0	0	1	0	0	0	0	0	0	0	0	59	0	1	98	0	1	37.3333	0	1	99.3333	0	0	0	0	1	194	0	1	1	0	1	16	0	1
1	1	5	0	0-60	3	0	0	0	1	0	1	0	0	1	0	1	1	1	0	0	0	0	0	0	0	49	0	1	93	1	1	37.6111	0	1	84	0	1	1.59	0	1	202	0	1	1	0	1	6	0	1
1	1	1	0	>80	5	0	0	0	1	0	0	0	0	0	0	0	0	0	0	0	0	0	0	0	0	82	3	1	92	1	1	36.4444	0	1	82.6667	0	0	0	0	1	268	0	1	1.1	0	1	18	0	1
1	1	4	0	0-60	3	1	0	0	0	0	0	0	0	0	0	1	1	0	0	0	0	0	0	0	0	49	0	1	95	0	1	38.4444	1	1	72	0	1	0.69	0	1	178	0	1	1.1	0	1	15	0	1
1	1	37	1	0-60	6	1	0	0	0	0	0	0	0	0	0	0	0	0	0	0	0	0	0	0	0	60	0	1	93	1	1	38.1667	1	1	88	0	1	13.51	1	1	192	0	1	1.2	1	1	61	1	1
1	1	2	0	>70	3	1	0	0	0	0	0	0	1	0	0	0	0	1	1	1	0	0	0	0	0	79	2	1	97	0	0	0	0	0	0	0	1	3.68	1	1	204	0	1	1.2	1	1	14	0	1
1	0	0	0	>60	5	0	1	0	0	0	1	1	0	0	0	0	0	0	0	0	0	0	0	0	0	68	1	1	94	0	1	36.3889	0	1	114	0	0	0	0	1	299	0	1	1.9	0	1	138	1	1
1	0	0	0	>80	9	1	0	0	0	0	1	0	0	0	0	0	0	0	0	0	0	0	0	0	0	84	3	1	83	1	1	36.1667	0	1	73.6667	0	1	17.38	1	1	243	0	1	1.4	1	1	100	1	1
1	1	7	1	>60	2	0	0	0	0	0	0	0	0	0	0	0	0	0	0	0	0	0	0	0	0	62	1	1	95	0	1	37.9444	0	1	85.3333	0	1	20	1	1	234	0	1	1.2	1	1	44	1	1
1	1	7	0	>70	5	0	0	0	0	0	0	0	0	0	0	0	0	0	0	0	0	0	0	0	0	72	2	1	94	0	1	37.1111	0	1	108.333	0	1	0.71	0	1	287	0	1	1.4	0	1	126	1	1
1	1	3	0	>70	4	0	0	0	1	0	0	0	0	0	0	0	0	0	0	0	0	0	0	0	0	79	2	1	100	0	1	36.8889	0	1	79.6667	0	1	15.64	1	1	273	0	1	1.2	1	1	15	0	1
1	1	6	0	0-60	3	1	0	0	0	0	0	0	0	0	0	0	0	0	0	0	0	0	0	0	0	39	0	1	98	0	1	38.0556	1	1	90.3333	0	1	1.33	0	1	169	0	1	1.3	0	0	0	0	1
1	1	6	0	>60	2	1	0	0	0	0	0	0	0	0	0	0	0	0	0	0	0	0	0	0	0	63	1	1	98	0	1	39.3333	1	1	90.3333	0	0	0	0	1	333	0	1	1	0	1	9	0	1
1	1	34	0	0-60	3	0	0	0	1	0	0	0	0	0	0	0	0	0	0	0	0	0	0	0	0	46	0	1	90	1	1	37.8333	0	1	106.333	0	1	0.28	0	1	130	1	1	1	0	0	0	0	1
1	1	10	0	>70	3	1	0	0	0	0	1	0	1	1	0	0	0	0	0	0	0	0	0	0	0	76	2	1	94	0	1	39.2778	1	1	90	0	1	0.95	0	1	150	0	1	1	0	1	12	0	1
1	1	16	0	0-60	4	0	0	0	1	0	0	0	0	0	1	0	0	0	0	0	0	0	0	0	0	59	0	1	76	1	1	39.3333	1	1	92.3333	0	1	3.65	1	1	204	0	1	1	1	1	14	0	1
1	1	11	0	0-60	4	1	0	0	0	0	0	0	0	0	0	0	0	0	1	1	0	0	0	0	0	55	0	1	100	0	1	36.8333	0	1	92	0	1	3.6	1	1	130	1	1	1	1	1	96	1	1
1	1	3	0	0-60	0	0	0	0	0	0	1	0	1	1	0	1	1	1	0	0	0	0	0	0	0	32	0	1	98	0	1	36.7222	0	1	96.6667	0	0	0	0	1	275	0	0	0	0	1	10	0	1
1	1	1	0	>60	2	1	0	0	0	0	0	1	0	0	0	0	0	1	0	0	0	0	0	0	0	68	1	1	92	1	1	38.1667	1	1	99	0	0	0	0	1	277	0	1	1.1	0	1	13	0	1
1	1	21	1	>80	7	0	1	0	0	0	0	0	0	0	0	0	0	0	0	0	0	0	0	0	0	83	3	1	89	1	1	37	0	1	79.6667	0	1	0.94	0	1	68	2	1	1.2	0	0	0	0	1
1	1	4	0	>70	2	1	0	0	0	0	0	0	0	0	0	1	1	1	0	0	0	0	0	0	0	76	2	1	96	0	1	37.0556	0	1	95.6667	0	0	0	0	1	261	0	1	1.1	0	1	10	0	1
1	1	7	0	>70	5	1	0	0	0	0	0	0	0	0	0	0	0	0	0	0	0	0	0	0	0	71	2	1	96	0	1	36.7778	0	1	76	0	1	5.67	1	1	242	0	1	7.5	1	0	0	0	1
1	1	7	0	>80	6	0	0	0	1	0	0	0	0	0	0	1	1	1	0	0	0	0	0	0	0	86	3	1	95	0	1	36.5	0	1	69.6667	0	1	3.37	1	1	483	0	1	1.2	1	1	20	0	1
1	1	3	1	>70	5	0	0	0	1	0	1	1	1	0	1	1	1	1	0	0	0	0	0	0	0	73	2	1	93	1	1	38.2778	1	1	76	0	1	2.68	0	1	381	0	1	2.2	0	1	35	1	1
1	1	11	0	>70	4	0	0	0	0	0	1	1	0	0	0	1	1	1	0	0	0	0	0	0	0	71	2	1	86	1	1	37	0	1	77	0	1	0.95	0	1	134	1	1	1.1	0	1	13	0	1
1	1	1	0	0-60	5	0	0	0	1	0	1	0	1	1	0	0	0	0	0	0	0	0	0	0	0	52	0	1	91	1	1	36.5556	0	1	85	0	1	10.36	1	1	502	0	1	1.3	1	1	46	1	1
1	1	4	1	>70	3	1	0	0	0	0	0	0	0	0	1	0	0	0	0	0	0	0	0	0	0	78	2	1	99	0	1	40.4444	1	1	66.3333	0	1	2.61	0	1	171	0	0	0	0	1	16	0	1
1	1	5	0	0-60	1	0	0	0	1	0	0	0	0	0	0	0	0	0	0	0	0	0	0	0	0	42	0	1	94	0	1	37.5	0	1	94.3333	0	0	0	0	1	154	0	1	1	0	1	6	0	1
1	1	3	0	>80	5	0	0	0	0	0	1	0	0	0	0	1	1	0	1	1	0	0	1	0	0	89	3	1	95	0	1	36.5556	0	1	66.6667	0	1	1.28	0	1	175	0	1	1.1	0	1	23	0	1
1	1	7	0	>70	2	0	0	0	1	0	0	0	0	0	0	0	0	0	0	0	0	0	0	0	0	80	2	1	95	0	1	37.2222	0	1	78.3333	0	1	2.06	0	1	230	0	1	1	0	1	22	0	1
1	1	4	1	>70	5	0	0	0	1	0	0	0	0	0	0	0	0	0	1	1	0	0	1	0	0	78	2	1	95	0	1	37.0556	0	1	51.3333	1	0	0	0	1	420	0	1	1.3	0	1	49	1	1
1	1	8	1	>80	5	1	0	0	0	1	0	1	0	0	0	0	1	1	0	0	0	0	0	0	0	83	3	1	100	0	1	37.1667	0	1	84.3333	0	1	1.76	0	1	106	1	1	1.2	0	1	23	0	1
1	1	6	1	0-60	5	1	0	0	0	0	0	0	0	0	0	0	0	0	0	0	0	0	0	0	0	43	0	1	95	0	1	36.8333	0	1	76.3333	0	1	12.59	1	1	230	0	1	1.1	1	1	44	1	1
1	1	1	1	>80	6	1	0	0	0	0	0	0	0	0	0	0	0	0	0	0	0	0	0	0	0	83	3	1	97	0	1	37.7222	0	1	109	0	1	3.99	1	1	226	0	1	1.5	1	1	20	0	1
1	1	15	0	>70	2	1	0	0	0	0	0	0	0	0	0	0	0	0	0	0	0	0	0	0	0	74	2	1	95	0	1	37.5556	0	1	91.3333	0	0	0	0	1	169	0	1	0.9	0	1	34	1	1
1	1	5	0	>70	2	1	0	0	0	0	0	1	0	0	0	0	0	1	1	1	0	0	0	0	0	74	2	1	99	0	1	36.7222	0	1	113.667	0	1	1.31	0	1	228	0	1	1	0	0	0	0	1
1	1	10	0	>80	6	1	0	0	0	0	0	0	0	1	0	0	0	1	1	1	0	0	0	0	0	84	3	1	97	0	1	37.7222	0	1	97.3333	0	1	1.02	0	1	125	1	1	1.2	0	1	44	1	1
1	1	18	0	>80	8	1	0	0	0	0	0	1	0	0	0	1	1	1	1	1	0	0	0	0	0	81	3	1	96	0	1	36.9444	0	1	69.3333	0	1	20	1	1	159	0	1	1.4	1	1	101	1	1
1	1	5	1	>80	8	0	0	0	0	0	0	0	0	0	0	0	0	0	0	0	0	0	0	0	0	87	3	1	99	0	1	36.2778	0	1	67.3333	0	1	4.71	1	1	172	0	1	1.7	1	1	131	1	1
1	1	10	0	>70	3	0	0	0	1	0	0	0	0	0	0	0	0	0	0	0	0	0	0	0	0	71	2	1	90	1	1	37.7222	0	1	93.3333	0	1	0.82	0	1	193	0	1	1	0	1	6	0	1
1	1	6	0	>80	5	0	0	0	0	0	0	1	0	0	0	0	0	1	0	0	0	0	0	0	0	93	3	1	97	0	1	37.1667	0	1	91.3333	0	0	0	0	1	66	2	1	0.9	0	1	37	1	1
1	1	7	0	>60	5	1	0	0	0	0	0	0	0	0	0	0	0	0	0	0	0	0	0	0	0	61	1	1	94	0	1	36.7778	0	1	73	0	1	20	1	1	392	0	1	1.2	1	0	0	0	1
1	1	9	0	>60	4	1	0	0	0	0	0	0	0	0	0	0	0	0	0	0	0	0	0	0	0	63	1	1	85	1	1	37.2778	0	1	91.6667	0	1	0.94	0	1	214	0	1	1	0	1	11	0	1
1	1	11	0	>60	2	0	0	0	1	0	0	0	0	0	0	0	0	0	0	0	0	0	0	0	0	70	1	1	97	0	1	38.1111	1	1	99.6667	0	1	2.99	0	1	242	0	1	1.2	0	1	22	0	1
1	1	2	0	>60	3	1	0	0	0	0	0	0	0	0	0	0	0	0	0	0	0	0	0	0	0	67	1	1	98	0	1	36.3333	0	1	94.3333	0	0	0	0	1	187	0	1	1	0	1	25	0	1
1	0	0	0	>60	2	0	0	0	1	0	1	0	0	0	0	0	0	0	0	0	0	0	0	0	0	64	1	1	100	0	1	37	0	1	76.6667	0	1	3.57	1	1	421	0	1	1.1	1	1	15	0	1
1	1	4	1	0-60	5	1	0	0	0	0	1	1	0	0	0	1	1	1	1	1	0	0	0	1	0	56	0	1	96	0	1	38	0	1	57.6667	1	0	0	0	1	255	0	1	1.3	0	1	70	1	1
1	1	10	1	0-60	4	0	0	0	1	0	1	1	1	0	0	0	0	1	0	0	0	0	0	0	0	56	0	1	90	1	1	37.6111	0	1	51.3333	1	0	0	0	1	228	0	1	1	0	1	7	0	1
1	1	2	0	0-60	0	0	0	0	1	0	0	0	0	0	0	0	0	0	0	0	0	0	0	0	0	59	0	1	99	0	1	37	0	1	61.6667	0	0	0	0	1	476	0	1	1.1	0	1	7	0	1
1	1	10	1	>80	7	0	0	0	1	0	0	0	0	0	0	0	0	0	0	0	0	0	0	0	0	82	3	1	93	1	1	37.2778	0	1	75	0	1	0.94	0	1	149	1	1	1	0	1	12	0	1
1	1	4	0	>80	6	0	1	0	0	0	0	0	0	0	0	0	0	0	0	0	0	0	0	0	0	93	3	1	99	0	1	37.0556	0	1	104.333	0	1	20	1	1	121	1	1	1.2	1	1	52	1	1
1	1	2	1	>70	7	1	0	0	0	0	0	0	0	0	0	0	0	1	0	0	0	0	0	0	0	76	2	1	54	1	1	36.2778	0	1	85.6667	0	0	0	0	1	299	0	1	1.5	0	0	0	0	1
1	1	7	0	>70	4	1	0	0	0	0	0	0	0	0	0	0	0	0	0	0	0	0	0	0	0	72	2	1	98	0	1	36.8333	0	1	106.333	0	1	3.57	1	1	306	0	1	1.2	1	0	0	0	1
1	1	3	0	0-60	1	0	0	0	1	1	0	1	0	0	0	1	1	1	0	0	0	0	0	0	0	29	0	1	96	0	1	37.3333	0	1	92.6667	0	1	1.97	0	1	386	0	1	1.2	0	1	11	0	1
1	1	14	1	>80	7	1	0	0	0	0	0	0	0	0	0	0	0	0	0	0	0	0	0	0	0	84	3	1	89	1	1	37.6667	0	1	44.3333	1	0	0	0	1	310	0	0	0	0	1	66	1	1
1	1	8	0	>70	8	0	0	0	1	0	1	0	0	0	0	0	0	0	0	0	0	0	0	0	0	77	2	1	100	0	1	37.5	0	1	75	0	1	1.23	0	1	79	2	1	1.2	0	1	51	1	1
1	1	38	0	0-60	2	1	0	0	0	0	0	0	0	0	1	0	0	0	1	1	0	0	0	1	0	60	0	1	93	1	1	36.8889	0	1	46.3333	1	1	2.91	0	1	336	0	1	1	0	1	22	0	1
1	1	4	0	>60	6	1	0	0	1	1	0	1	0	0	0	0	1	1	0	0	0	0	0	0	0	65	1	1	90	1	1	37.3333	0	1	93.6667	0	1	0.26999	0	1	223	0	1	1.5	0	1	89	1	1
1	1	4	0	>70	3	1	0	0	0	0	0	0	0	0	0	0	0	0	0	0	0	0	0	0	0	71	2	1	95	0	1	36.5556	0	1	84	0	1	10.52	1	1	264	0	1	1	1	0	0	0	1
1	1	16	0	>70	8	1	0	0	0	0	0	0	0	0	0	0	0	0	0	0	0	0	0	0	0	79	2	1	88	1	1	36.6667	0	1	70	0	1	20	1	1	259	0	1	1.2	1	1	71	1	1
1	1	8	0	>70	2	1	0	0	0	0	0	0	0	0	0	0	0	0	1	1	0	0	0	1	0	78	2	1	97	0	1	37.6111	0	1	87.6667	0	0	0	0	1	202	0	1	1	0	1	16	0	1
1	1	1	1	>80	7	1	0	0	0	0	0	0	0	0	0	0	0	0	0	0	0	0	0	0	0	81	3	1	98	0	1	36.3333	0	1	66.6667	0	1	6.12	1	1	327	0	1	1.1	1	0	0	0	1
1	1	4	0	0-60	0	1	0	0	0	0	0	0	1	0	0	0	0	1	0	0	0	0	0	0	0	41	0	1	99	0	1	37.6111	0	1	84.3333	0	0	0	0	1	231	0	1	0.9	0	1	9	0	1
1	1	17	0	0-60	2	1	0	0	0	0	0	1	0	0	0	0	0	0	0	0	0	0	0	0	0	53	0	1	96	0	1	37.0556	0	1	80.3333	0	1	2.87	0	1	208	0	1	1.2	0	0	0	0	1
1	1	16	1	0-60	4	0	0	0	1	0	0	0	0	0	0	0	0	0	0	0	0	0	0	0	0	52	0	1	72	1	1	39.2222	1	1	92.6667	0	1	2.24	0	1	202	0	1	1.1	0	1	39	1	1
1	1	13	1	>80	5	1	0	0	0	1	0	0	0	0	0	0	1	0	1	1	0	0	0	0	0	87	3	1	96	0	1	37.6111	0	1	61	0	1	0.26999	0	1	126	1	1	1	0	0	0	0	1
1	1	2	0	0-60	0	0	1	0	0	0	0	0	0	0	0	0	0	0	1	1	0	0	0	0	0	41	0	1	99	0	1	36.7778	0	1	74	0	1	0.71	0	1	170	0	1	1.1	0	1	9	0	1
1	1	16	0	0-60	2	1	0	0	0	0	0	0	0	0	0	0	0	1	0	0	0	0	0	0	0	39	0	1	100	0	1	37	0	1	66	0	1	7.87	1	1	494	0	1	1.1	1	1	15	0	1
1	1	3	1	>70	5	1	0	0	0	0	0	0	0	0	0	0	0	0	0	0	0	0	0	0	0	71	2	1	80	1	1	38.9444	1	1	74.3333	0	1	1.3	0	1	151	0	1	1.1	0	1	42	1	1
1	1	4	1	>80	7	1	0	0	0	0	0	0	0	0	0	0	0	0	0	0	0	0	0	0	0	91	3	1	62	1	1	37.2222	0	1	89	0	1	20	1	1	393	0	1	1	1	1	60	1	1
1	1	7	0	>80	3	1	0	0	1	0	0	0	0	0	0	0	0	0	1	0	0	0	0	0	1	86	3	1	100	0	1	36.8333	0	1	113.333	0	1	2.55	0	1	263	0	1	1	0	0	0	0	1
1	1	2	0	0-60	0	1	0	0	0	0	0	1	0	0	0	0	0	0	1	1	0	0	0	0	0	58	0	1	99	0	1	36.4444	0	1	94	0	0	0	0	1	201	0	1	0.9	0	1	11	0	1
1	1	7	0	>80	6	0	1	0	1	0	1	0	1	0	0	0	0	0	0	0	0	0	0	0	0	81	3	1	96	0	1	36.6667	0	1	82.3333	0	1	1.49	0	1	144	1	1	1.1	0	1	29	0	1
1	1	42	1	>60	3	1	0	0	0	0	0	0	0	0	0	0	0	0	0	0	0	0	0	0	0	66	1	1	96	0	1	37.9444	0	1	83.3333	0	1	1.96	0	1	213	0	1	1	0	0	0	0	1
1	1	3	0	0-60	0	1	0	0	0	0	0	0	0	0	0	0	0	0	0	0	0	0	0	0	0	53	0	1	95	0	1	37.0556	0	0	0	0	1	0.52	0	1	281	0	1	1.1	0	1	10	0	1
1	1	11	0	>60	7	0	1	0	0	0	0	0	0	0	0	0	0	0	0	0	0	0	0	0	0	64	1	1	89	1	1	37.8333	0	1	81.6667	0	1	20	1	1	203	0	1	1.2	1	1	94	1	1
1	1	10	1	0-60	3	0	0	0	1	0	0	0	0	0	0	0	0	0	0	0	0	0	0	0	0	57	0	1	60	1	1	39.3333	1	1	80.6667	0	1	0.62	0	1	416	0	1	1	0	1	28	0	1
1	1	10	0	>80	6	0	1	0	1	0	0	1	1	0	0	0	0	0	1	1	0	0	0	0	0	83	3	1	96	0	1	36.8333	0	1	101.667	0	1	3.74	1	1	413	0	1	1.2	1	1	28	0	1
1	1	18	0	>80	5	1	0	0	0	0	1	1	1	0	0	1	1	1	1	1	0	0	0	0	0	88	3	1	94	0	1	36.5556	0	1	98	0	1	1.14	0	1	231	0	1	4.7	0	0	0	0	1
1	1	10	0	>80	5	1	0	0	0	0	1	0	0	0	0	0	0	1	0	0	0	0	0	0	0	95	3	1	95	0	1	36.8333	0	1	80	0	0	0	0	1	163	0	1	1	0	1	32	1	1
1	1	4	0	>60	5	1	0	0	0	1	0	1	0	0	0	0	1	1	0	0	0	0	0	0	0	66	1	1	99	0	1	38	0	1	90.6667	0	1	20	1	1	133	1	1	1.2	1	1	148	1	1
1	1	6	0	>70	6	0	0	0	1	0	1	0	0	0	0	0	0	1	0	0	0	0	0	0	0	80	2	1	93	1	1	39.2778	1	1	98.6667	0	1	1.16	0	1	130	1	1	1.2	0	1	17	0	1
1	1	16	1	>70	7	0	1	0	0	0	0	0	0	0	0	0	0	0	0	0	0	0	0	0	0	78	2	1	85	1	1	37.1111	0	1	99.3333	0	1	3.59	1	1	153	0	1	1.2	1	1	46	1	1
1	1	5	1	>70	7	0	0	0	1	0	1	1	1	1	0	1	1	1	0	0	0	0	0	0	0	73	2	1	77	1	1	36.5	0	1	50.3333	1	1	20	1	1	426	0	1	1.4	1	0	0	0	1
1	1	10	0	0-60	4	1	0	0	0	0	0	0	0	0	0	0	0	0	0	0	0	0	0	0	0	52	0	1	84	1	1	40.0556	1	1	108	0	1	1.75	0	1	240	0	1	1	0	1	22	0	1
1	1	4	0	0-60	0	1	0	0	0	0	0	1	0	0	0	1	1	1	0	0	0	0	0	0	0	49	0	1	94	0	1	37.1111	0	1	80.3333	0	0	0	0	1	253	0	0	0	0	1	9	0	1
1	1	4	1	>70	5	1	0	0	0	0	0	0	0	0	0	0	0	0	0	0	0	0	0	0	0	79	2	1	94	0	1	37.2222	0	1	75.6667	0	0	0	0	1	206	0	1	1.1	0	1	71	1	1
1	1	1	1	>80	9	1	0	0	1	0	0	0	0	0	0	0	0	0	0	0	0	0	0	0	0	86	3	1	81	1	1	36.2222	0	1	35.3333	1	1	8.82	1	1	113	1	1	1.9	1	1	39	1	1
1	1	2	0	0-60	0	0	1	0	1	0	0	0	0	0	0	0	0	0	0	0	0	0	0	0	0	46	0	1	95	0	1	37.1111	0	1	68.6667	0	1	0.44	0	1	274	0	1	1	0	1	5	0	1
1	1	2	0	>60	2	0	0	1	0	0	0	0	1	0	0	0	0	0	0	0	0	0	0	0	0	65	1	1	95	0	1	36.9444	0	1	87.3333	0	1	0.9	0	1	405	0	1	1	0	1	8	0	1
1	1	23	0	>60	3	1	0	0	0	0	0	0	0	0	0	1	1	0	0	0	0	0	0	0	0	68	1	1	100	0	1	37.2222	0	1	99.3333	0	1	2.01	0	1	214	0	1	0.9	0	1	14	0	1
1	1	3	0	0-60	1	1	0	0	0	0	0	0	0	0	0	0	0	0	1	1	0	0	0	0	0	38	0	1	98	0	1	37.5	0	1	90.3333	0	1	0.32	0	1	275	0	1	1	0	1	8	0	1
1	1	29	0	>80	5	0	1	0	0	0	0	0	0	1	0	0	0	0	0	0	0	0	0	0	0	87	3	1	100	0	1	38.2222	1	1	80.3333	0	1	2.86	0	1	248	0	1	1	0	0	0	0	1
1	1	18	0	>60	3	0	0	0	0	0	1	0	0	0	0	0	0	0	0	0	0	0	0	0	0	65	1	1	92	1	1	37.1111	0	1	77	0	1	0.84	0	1	145	1	1	1	0	1	30	0	1
1	1	6	0	>70	3	1	0	0	0	0	0	0	0	0	0	0	0	0	0	0	0	0	0	0	0	79	2	1	100	0	1	37	0	1	90.6667	0	0	0	0	1	181	0	1	1.3	0	1	12	0	1
1	1	12	0	>60	6	0	0	0	1	0	0	0	0	0	0	0	0	0	0	0	0	0	0	0	0	65	1	1	89	1	1	37.0556	0	1	104.333	0	1	1.7	0	1	129	1	1	1	0	1	30	0	1
1	1	10	0	>70	3	0	0	1	0	0	0	0	0	0	0	0	0	0	0	0	0	0	0	0	0	80	2	1	96	0	1	36.3889	0	1	100.333	0	1	2.73	0	0	0	0	1	17.0001	0	0	0	0	0
1	1	5	0	>60	1	0	1	0	0	0	0	0	0	0	0	0	0	0	0	0	0	0	0	0	0	67	1	1	94	0	1	36.2778	0	1	106.667	0	1	2.54	0	1	181	0	1	1	0	1	36	1	1
1	1	4	0	>70	2	0	0	0	0	1	0	1	0	0	0	0	1	0	0	0	0	0	0	0	0	71	2	1	98	0	1	36.7222	0	1	95	0	1	2.62	0	1	473	0	1	1.2	0	1	23	0	1
1	1	7	0	0-60	2	0	0	0	1	0	0	0	0	0	0	0	0	0	0	0	0	0	0	0	0	57	0	1	95	0	1	37.1111	0	1	90.3333	0	1	2.29	0	1	605	0	1	1.1	0	1	24	0	1
1	1	11	0	0-60	5	0	0	0	0	0	0	0	0	0	0	0	0	0	0	0	0	0	0	0	0	60	0	1	80	1	1	37.9444	0	1	80.3333	0	1	1.35	0	1	171	0	1	1.3	0	1	46	1	1
1	1	12	1	>80	5	1	0	0	0	0	1	0	0	0	0	0	0	0	1	1	0	0	0	0	0	82	3	1	98	0	1	37.6111	0	1	71.3333	0	1	5.17	1	1	369	0	0	0	1	1	18	0	1
1	1	6	0	>60	3	1	0	0	0	0	0	1	0	0	0	0	0	0	0	0	0	0	0	0	0	70	1	1	93	1	1	38.9444	1	1	96	0	0	0	0	1	226	0	1	0.9	0	1	13	0	1
1	1	13	0	>80	7	0	0	0	0	0	0	0	0	0	0	0	0	0	0	0	0	0	0	0	0	82	3	1	93	1	1	37.9444	0	1	79	0	1	4.34	1	1	227	0	1	1.1	1	1	36	1	1
1	1	5	0	0-60	1	1	0	0	0	0	1	1	1	1	0	0	0	1	0	0	0	0	0	0	0	50	0	1	96	0	1	39.2222	1	1	103	0	1	0.65	0	1	483	0	1	1	0	1	18	0	1
1	1	9	0	>70	3	1	0	0	0	0	0	0	0	0	0	0	0	1	0	0	0	0	0	0	0	78	2	1	100	0	1	37.1111	0	1	82.6667	0	1	2.58	0	1	398	0	1	1	0	1	12	0	1
1	1	1	0	>70	3	0	0	1	0	0	0	0	0	0	0	0	0	0	0	0	0	0	0	0	0	71	2	1	98	0	1	37.6111	0	1	87.6667	0	0	0	0	1	110	1	0	0	0	1	22	0	1
1	1	4	0	0-60	0	1	0	0	0	0	0	1	0	0	0	0	0	1	0	0	0	0	0	0	0	27	0	1	100	0	1	36.4444	0	1	74	0	0	0	0	1	272	0	1	1	0	1	17	0	1
1	1	2	1	>80	5	0	0	1	0	0	0	0	0	0	0	0	0	0	0	0	0	0	0	0	0	95	3	1	97	0	1	38.9444	1	1	51	1	0	0	0	1	155	0	1	1.1	0	1	28	0	1
1	1	11	1	>70	7	1	0	0	0	0	0	0	1	0	1	0	0	1	0	0	0	0	0	0	0	76	2	1	72	1	1	36.8889	0	1	81	0	1	12.74	1	1	175	0	1	1.1	1	1	19	0	1
1	1	4	1	>70	7	1	0	0	0	0	0	0	0	0	0	0	0	0	0	0	0	0	0	0	0	73	2	1	85	1	1	37.7778	0	1	80.3333	0	1	20	1	1	89	2	1	1.7	1	1	65	1	1
1	1	8	1	>60	6	0	0	0	0	0	0	0	0	0	0	0	0	1	1	0	1	0	0	0	0	69	1	1	79	1	1	38.4444	1	1	38.6667	1	1	20	1	1	171	0	1	1	1	1	23	0	1
1	1	1	1	>80	9	1	0	0	0	0	1	1	1	0	0	0	1	1	0	0	0	0	0	0	0	103	3	1	83	1	1	36.8333	0	1	89.3333	0	1	1.63	0	1	149	1	1	1.9	0	1	73	1	1
1	1	12	0	>60	4	0	1	0	0	0	0	0	0	0	0	0	0	0	1	0	1	0	0	0	0	62	1	1	99	0	1	36.9444	0	1	89	0	1	20	1	1	172	0	1	1.3	1	1	11	0	1
1	1	1	0	>60	3	1	0	0	0	0	0	0	0	0	0	0	0	0	0	0	0	0	0	0	0	63	1	1	100	0	1	36.9444	0	1	88.6667	0	0	0	0	1	180	0	1	0.9	0	1	15	0	1
1	1	1	0	>60	6	1	0	0	0	0	0	0	0	0	0	0	0	0	0	0	0	0	0	0	0	61	1	1	92	1	1	37.7778	0	1	89.3333	0	0	0	0	1	189	0	1	1	0	1	52	1	1
1	1	1	1	>70	7	0	0	0	0	0	0	0	0	0	0	0	0	0	0	0	0	0	0	0	0	75	2	1	78	1	1	36.2222	0	1	29	1	1	3.26	1	1	185	0	1	1.1	1	1	44	1	1
1	1	5	0	>60	1	0	0	0	1	0	0	0	1	0	0	0	0	0	0	0	0	0	0	0	0	64	1	1	94	0	1	36.6667	0	1	76.3333	0	0	0	0	1	251	0	1	1	0	1	9	0	1
1	1	6	1	>70	7	1	0	0	0	0	0	0	0	0	0	0	0	0	0	0	0	0	0	0	0	76	2	1	93	1	1	37.3889	0	1	86.6667	0	1	0.37	0	1	174	0	1	2.5	0	0	0	0	1
1	1	8	1	>80	6	1	0	0	0	0	0	0	0	1	0	0	0	0	1	1	0	0	0	0	0	81	3	1	85	1	1	37.2778	0	1	107.333	0	0	0	0	1	187	0	1	1.9	0	1	20	0	1
1	1	2	1	>70	7	0	0	0	1	0	0	0	0	0	0	1	1	1	0	0	0	0	0	0	0	80	2	1	87	1	1	37.8333	0	1	47.6667	1	1	20	1	1	178	0	1	0.9	1	1	20	0	1
1	1	1	0	0-60	3	0	0	0	1	0	1	0	0	0	0	0	0	0	0	0	0	0	0	0	0	55	0	1	0	1	1	0	0	0	0	0	1	0	0	1	0	2	1	0	0	0	0	0	0
1	1	6	0	>80	7	1	0	0	0	0	0	1	0	0	0	0	0	0	0	0	0	0	0	0	0	81	3	1	88	1	1	36.3889	0	1	90.6667	0	0	0	0	1	308	0	1	1.3	0	1	82	1	1
1	1	5	0	>80	5	0	0	1	0	0	0	0	1	0	0	0	0	1	0	0	0	0	0	0	0	81	3	1	98	0	1	37.2222	0	1	90.6667	0	1	1.04	0	1	181	0	1	1	0	1	16	0	1
1	1	2	0	0-60	1	0	1	0	0	0	1	0	0	0	0	0	0	0	0	0	0	0	0	0	0	59	0	1	96	0	1	37.4444	0	1	103.333	0	1	2.35	0	1	148	1	1	1.1	0	1	15	0	1
1	1	13	0	0-60	2	0	1	0	1	1	1	1	0	1	0	0	1	1	0	0	0	0	0	0	0	40	0	1	97	0	1	37.7222	0	1	84.6667	0	1	0.86	0	1	184	0	1	1.1	0	1	16	0	1
1	1	9	1	>60	4	1	0	0	0	0	1	0	1	0	0	0	0	0	0	0	0	0	0	0	0	62	1	1	80	1	1	37.3333	0	1	70.3333	0	0	0	0	1	259	0	1	1.2	0	1	33	1	1
1	1	4	0	>70	3	1	0	0	0	0	0	0	0	0	0	0	0	0	0	0	0	0	0	0	0	80	2	1	98	0	1	38.3889	1	1	116.333	0	1	0.91	0	1	223	0	1	1	0	1	18	0	1
1	1	3	0	0-60	1	1	0	0	0	0	0	0	0	0	0	0	0	0	1	0	1	0	0	0	0	60	0	1	100	0	1	37.0556	0	1	113.333	0	1	20	1	1	330	0	1	1	1	1	11	0	1
1	1	12	1	>70	4	0	0	0	1	0	0	0	0	0	1	0	0	0	1	0	1	0	0	0	0	77	2	1	95	0	1	36.8889	0	1	53.3333	1	1	3.45	1	1	220	0	1	1.1	1	1	24	0	1
1	1	6	0	>80	4	0	0	0	0	0	1	0	1	0	0	1	1	0	0	0	0	0	0	0	0	83	3	1	95	0	1	36.3889	0	1	79.3333	0	0	0	0	1	157	0	1	2.8	0	1	54	1	1
1	1	35	0	0-60	1	0	1	0	0	0	1	1	1	0	0	0	0	1	0	0	0	0	0	0	0	47	0	1	100	0	1	37.1111	0	1	100	0	1	0.79	0	1	186	0	1	1	0	0	0	0	1
1	1	21	1	0-60	3	0	1	0	1	0	0	0	0	0	0	0	0	0	0	0	0	0	0	0	0	54	0	1	65	1	1	37.2222	0	1	54.3333	1	1	0.89	0	1	225	0	1	1	0	0	0	0	1
1	0	0	0	>70	11	0	0	0	1	0	0	1	1	1	0	1	1	1	0	0	0	0	0	0	0	73	2	1	88	1	1	38.2222	1	1	67.6667	0	1	9.88	1	1	69	2	1	1.3	1	1	49	1	1
1	1	14	1	>80	4	0	0	0	1	0	0	0	0	0	0	0	0	0	0	0	0	0	0	0	0	87	3	1	97	0	1	36.7222	0	1	60	1	1	0.84	0	1	213	0	1	1.1	0	1	12	0	1
1	1	9	0	0-60	3	1	0	0	0	0	0	0	0	0	0	0	0	0	0	0	0	0	0	0	0	57	0	1	91	1	1	37.7778	0	1	114.667	0	1	1.46	0	1	180	0	1	1	0	1	32	1	1
1	0	0	0	>60	6	0	0	0	1	0	0	0	0	0	0	0	0	0	0	0	0	0	0	0	0	63	1	1	85	1	1	36.6111	0	1	91.3333	0	1	4.85	1	1	133	1	1	1.1	1	1	15	0	1
1	1	4	0	>70	2	0	0	0	1	0	0	0	0	0	0	0	0	0	0	0	0	0	0	0	0	74	2	1	100	0	1	36.3889	0	1	108.667	0	1	1.31	0	1	159	0	1	1.1	0	1	24	0	1
1	1	14	1	>70	4	0	1	0	0	0	0	0	0	0	0	0	0	0	0	0	0	0	0	0	0	77	2	1	93	1	1	37.2778	0	1	86.6667	0	1	0.71	0	1	169	0	1	1.5	0	1	24	0	1
1	1	4	0	>70	3	0	0	0	1	0	0	0	0	0	0	0	0	0	0	0	0	0	0	0	0	75	2	1	99	0	1	37.1111	0	1	90	0	1	0.4	0	1	648	0	1	1.2	0	1	9	0	1
1	1	1	0	>60	1	0	0	1	0	0	0	0	0	0	0	0	0	0	0	0	0	0	0	0	0	62	1	1	96	0	1	36.6667	0	1	93.6667	0	1	0.59	0	1	346	0	1	1	0	1	18	0	1
1	1	1	1	>80	6	0	0	0	1	0	0	0	0	0	0	0	0	0	0	0	0	0	0	0	0	90	3	1	96	0	1	37.0556	0	1	58	1	0	0	0	1	125	1	0	0	0	1	18	0	1
1	1	6	0	0-60	2	0	0	0	1	0	0	0	0	0	0	0	0	1	1	0	0	1	0	0	0	27	0	1	98	0	1	37.3889	0	1	83.6667	0	0	0	0	1	111	1	1	1.1	0	1	7	0	1
1	1	28	0	>60	4	1	0	0	0	0	1	0	0	0	0	0	0	0	0	0	0	0	0	0	0	65	1	1	97	0	1	39.4444	1	1	80.3333	0	1	0.71	0	1	266	0	1	1.4	0	0	0	0	1
1	1	3	0	>70	4	1	0	0	0	1	0	0	0	0	1	0	1	0	0	0	0	0	0	0	0	77	2	1	94	0	1	36.8889	0	1	80.6667	0	1	0.69	0	1	204	0	1	1.1	0	1	47	1	1
1	1	18	1	>80	4	0	1	0	0	1	0	1	1	0	0	0	1	0	1	1	0	0	0	1	0	86	3	1	68	1	1	36.5	0	1	70.6667	0	0	0	0	1	272	0	1	1.2	0	1	36	1	1
1	1	2	0	>70	4	1	0	0	0	0	0	0	0	0	0	0	0	0	0	0	0	0	0	0	0	74	2	1	91	1	1	37.9444	0	1	87	0	1	1.25	0	1	172	0	1	1	0	1	8	0	1
1	1	5	0	>60	4	0	0	0	1	0	2	1	1	0	0	0	0	0	0	0	0	0	0	0	0	69	1	1	100	0	1	36.9444	0	1	89.6667	0	1	5.11	1	1	427	0	1	1.1	1	1	18	0	1
1	1	5	1	>70	6	0	0	0	0	0	0	0	0	0	0	0	0	0	1	0	1	0	0	0	0	72	2	1	82	1	1	36.6111	0	0	0	0	1	20	1	1	178	0	1	1.2	1	0	0	0	1
1	1	8	1	>60	7	1	0	0	0	0	1	1	1	0	0	0	0	0	1	1	0	0	0	0	0	67	1	1	82	1	1	37.9444	0	1	70	0	1	4.12	1	1	140	1	1	1.1	1	0	0	0	1
1	1	2	1	>80	7	1	0	0	0	0	0	0	0	0	1	0	0	0	0	0	0	0	0	0	0	81	3	1	100	0	1	36.7222	0	1	67	0	1	20	1	1	339	0	1	1.1	1	1	63	1	1
1	1	3	0	0-60	0	0	0	0	0	0	0	0	0	0	0	0	0	0	0	0	0	0	0	0	0	32	0	1	100	0	1	37	0	1	78	0	0	0	0	1	373	0	0	0	0	1	5	0	1
1	1	23	1	>70	7	0	0	0	1	0	0	0	0	0	0	0	0	0	0	0	0	0	0	0	0	71	2	1	77	1	1	38.1111	1	1	24.3333	1	1	20	1	1	225	0	1	1.2	1	0	0	0	1
1	1	28	1	>70	5	0	0	0	1	0	0	0	0	0	0	0	0	0	0	0	0	0	0	0	0	74	2	1	94	0	1	36.8889	0	1	33.3333	1	1	1.01	0	1	150	0	1	1.5	0	1	27	0	1
1	1	2	0	>60	3	0	0	0	0	0	0	0	0	0	0	0	0	0	0	0	0	0	0	0	0	63	1	1	92	1	1	37.5556	0	1	99.3333	0	1	0.83	0	1	327	0	1	1.1	0	1	21	0	1
1	1	8	0	>80	5	1	0	0	0	0	0	0	0	0	0	0	0	0	0	0	0	0	0	0	0	84	3	1	100	0	1	37.3333	0	1	109.667	0	1	7.43	1	1	254	0	1	1.4	1	1	91	1	1
1	1	5	0	>60	5	0	0	0	0	1	0	0	0	0	0	0	1	0	0	0	0	0	0	0	0	62	1	1	96	0	1	37.5556	0	1	76.6667	0	1	20	1	1	366	0	1	1.3	1	1	20	0	1
1	1	3	0	>60	2	0	0	0	1	0	0	0	0	0	0	0	0	0	0	0	0	0	0	0	0	61	1	1	95	0	1	37.2222	0	1	94.6667	0	1	0.4	0	1	104	1	1	1	0	1	38	1	1
1	1	5	0	0-60	2	0	0	0	0	0	0	1	0	1	0	0	0	0	0	0	0	0	0	0	0	57	0	1	89	1	1	37.6667	0	1	73.3333	0	0	0	0	1	225	0	1	1	0	1	9	0	1
1	1	2	0	>60	2	0	0	0	0	0	0	0	0	0	0	0	0	0	0	0	0	0	0	0	0	63	1	1	90	1	1	36.7778	0	1	96.3333	0	1	0.69	0	1	298	0	1	1	0	1	17	0	1
1	1	2	0	>60	3	0	0	0	1	0	0	0	0	0	0	0	0	0	0	0	0	0	0	0	0	66	1	1	90	1	1	36.9444	0	1	110.667	0	1	2.14	0	1	378	0	1	1.2	0	1	19	0	1
1	1	17	0	>70	7	1	0	0	0	0	0	0	0	0	0	0	0	1	0	0	0	0	0	0	0	77	2	1	94	0	1	36.6111	0	1	73.6667	0	1	3.71	1	1	232	0	0	0	1	1	19	0	1
1	0	0	0	0-60	2	0	0	0	0	0	0	0	0	0	0	0	0	0	0	0	0	0	0	0	0	29	0	1	94	0	1	39.2778	1	1	92.6667	0	1	1.1	0	1	381	0	1	1.2	0	0	0	0	1
1	1	17	1	>80	7	1	0	0	0	0	0	0	0	0	0	0	0	0	0	0	0	0	0	0	0	81	3	1	91	1	1	38.2222	1	1	104.333	0	1	1.52	0	1	109	1	1	1.1	0	1	25	0	1
1	1	7	0	0-60	1	1	0	0	0	0	0	1	1	1	0	0	0	1	0	0	0	0	0	0	0	51	0	1	100	0	1	39.0556	1	1	94.3333	0	1	0.6	0	1	229	0	1	1	0	1	20	0	1
1	1	3	1	0-60	7	1	0	0	0	0	0	0	0	0	1	0	0	1	0	0	0	0	0	0	0	59	0	1	86	1	1	37.3889	0	1	117	0	1	15.75	1	1	305	0	1	1.4	1	1	43	1	1
1	1	10	0	>60	4	1	0	0	0	0	0	0	0	0	0	0	0	0	0	0	0	0	0	0	0	69	1	1	100	0	1	36.1111	0	1	94	0	1	2.46	0	1	273	0	1	1.3	0	1	32	1	1
1	1	9	0	>60	5	0	0	0	0	0	1	0	0	0	0	1	1	0	0	0	0	0	0	0	0	61	1	1	90	1	1	37.5556	0	1	94.6667	0	0	0	0	1	118	1	0	0	0	1	13	0	1
1	1	2	0	>60	2	1	0	0	0	0	1	1	0	0	0	0	1	1	0	0	0	0	0	0	0	62	1	1	98	0	1	36.6111	0	1	85.6667	0	0	0	0	1	718	0	1	1.1	0	1	16	0	1
1	1	6	1	>60	6	0	0	0	0	0	0	1	1	0	0	1	1	1	0	0	0	0	0	0	0	70	1	1	57	1	1	37.6111	0	1	103	0	1	20	1	1	379	0	1	1	1	0	0	0	1
1	1	11	1	>80	7	0	0	0	0	0	0	0	0	0	0	0	0	0	1	1	0	0	0	0	0	81	3	1	98	0	1	36.6111	0	1	56.6667	0	1	3.72	1	1	172	0	1	1.1	1	1	63	1	1
1	1	6	0	>60	2	0	0	0	1	0	1	0	0	0	0	1	1	0	0	0	0	0	0	0	0	62	1	0	0	1	1	-17.7778	0	1	98	0	0	0	0	0	0	0	0	0	0	0	0	0	0
1	0	0	0	>60	7	0	0	0	1	0	1	1	0	0	1	0	0	0	1	0	0	0	0	0	1	68	1	1	96	0	1	39.1111	1	1	68.3333	0	1	11.06	1	1	140	1	1	1.2	1	1	71	1	1
1	1	10	1	>80	8	1	0	0	0	0	0	0	0	0	0	0	0	0	0	0	0	0	0	0	0	97	3	1	91	1	1	37.8889	0	1	48.3333	1	1	9.45	1	1	130	1	1	1.1	1	1	15	0	1
1	1	2	0	>70	4	0	1	0	0	0	1	0	0	0	0	1	1	1	1	1	0	0	0	0	0	75	2	1	83	1	1	35.2222	0	1	72	0	1	2.44	0	1	224	0	1	1.1	0	1	25	0	1
1	1	3	1	>70	4	0	0	1	0	0	0	0	0	0	0	0	0	0	0	0	0	0	0	0	0	80	2	1	86	1	1	37.0556	0	1	79.3333	0	1	2.85	0	1	188	0	1	1	0	1	26	0	1
1	1	2	0	>70	4	0	0	0	1	0	0	0	0	0	0	0	0	0	0	0	0	0	0	0	0	71	2	1	95	0	1	36.5556	0	1	90.3333	0	1	0.39	0	1	120	1	1	3.6	0	0	0	0	1
1	1	17	0	0-60	3	1	0	0	0	0	0	0	0	0	0	0	0	0	0	0	0	0	0	0	0	55	0	1	97	0	1	38.7778	1	1	94.6667	0	1	1.9	0	1	122	1	1	1	0	0	0	0	1
1	1	5	0	>70	6	1	0	0	0	0	0	0	0	0	0	0	0	0	1	1	0	0	1	0	0	73	2	1	96	0	1	36.9444	0	1	103	0	1	3.11	1	1	225	0	1	1	1	1	82	1	1
1	1	9	0	>80	8	1	0	0	0	0	0	0	0	0	0	0	0	1	0	0	0	0	0	0	0	91	3	1	97	0	1	36.8333	0	1	86.3333	0	1	4.55	1	1	187	0	1	1.1	1	1	91	1	1
1	1	2	0	>80	4	0	0	0	0	0	0	0	0	0	0	0	0	0	0	0	0	0	0	0	0	82	3	1	100	0	1	38	0	1	86.3333	0	1	2.21	0	1	200	0	1	1.1	0	1	30	0	1
1	1	6	1	>70	5	1	0	0	0	0	0	0	0	0	0	0	0	0	0	0	0	0	0	0	0	78	2	1	96	0	1	37.9444	0	1	78.6667	0	1	2.25	0	1	162	0	1	1	0	1	27	0	1
1	0	0	0	>70	2	1	0	0	0	0	0	0	0	0	1	0	0	0	0	0	0	0	0	0	0	77	2	1	95	0	1	37.6111	0	1	102.667	0	1	2.16	0	1	167	0	1	1	0	1	15	0	1
1	1	5	0	>60	4	0	0	0	0	0	0	0	0	0	0	0	0	0	0	0	0	0	0	0	0	65	1	1	98	0	1	37.6667	0	1	85.3333	0	0	0	0	1	91	2	1	1.4	0	1	6	0	1
1	1	13	1	>60	6	1	0	0	0	0	1	0	0	1	0	0	0	1	0	0	0	0	0	0	0	65	1	1	83	1	1	36.3889	0	1	77.6667	0	1	1.09	0	1	233	0	1	1.4	0	0	0	0	1
1	1	14	0	0-60	3	0	0	0	1	1	1	1	0	0	1	0	1	1	0	0	0	0	0	0	0	19	0	1	89	1	1	37.6667	0	1	88	0	1	0.59	0	1	147	1	1	1.2	0	0	0	0	1
1	1	9	0	0-60	4	1	0	0	1	0	0	0	0	0	0	0	0	0	0	0	0	0	0	0	0	43	0	1	95	0	1	37.3889	0	1	82.6667	0	1	0.7	0	1	94	2	1	0.9	0	1	11	0	1
1	1	16	0	>70	6	1	0	0	0	1	1	1	1	0	0	0	1	1	0	0	0	0	0	0	0	73	2	1	96	0	1	37.6667	0	1	75.6667	0	1	20	1	1	197	0	1	1.2	1	1	103	1	1
1	1	5	1	>70	4	1	0	0	0	0	0	0	0	0	0	0	0	0	0	0	0	0	0	0	0	80	2	1	99	0	1	36.6111	0	1	89.6667	0	1	8.38	1	1	230	0	1	1.2	1	0	0	0	1
1	1	4	0	>60	4	1	0	0	0	0	0	0	0	0	0	0	0	0	1	1	0	0	1	0	0	67	1	1	100	0	1	38.2778	1	1	102	0	1	4.95	1	1	174	0	1	1	1	1	15	0	1
1	1	2	0	>60	2	0	0	0	1	0	1	0	0	0	0	1	1	0	0	0	0	0	0	0	0	66	1	1	94	0	1	36.5556	0	1	75.3333	0	1	3.63	1	1	357	0	1	1.1	1	1	31	1	1
1	0	0	0	>70	7	0	0	0	0	0	0	0	0	0	0	0	0	0	0	0	0	0	0	0	0	79	2	1	97	0	1	37.6111	0	1	89	0	1	20	1	1	159	0	1	1.7	1	1	81	1	1
1	1	3	0	>60	1	1	0	0	0	0	0	0	0	0	0	0	0	0	0	0	0	0	0	0	0	63	1	1	100	0	1	34.7778	0	1	84	0	1	0.54	0	1	328	0	1	0.9	0	1	9	0	1
1	1	6	1	>80	7	0	0	0	1	1	1	1	0	0	0	1	1	1	0	0	0	0	0	0	0	89	3	1	89	1	1	36.9444	0	1	69.6667	0	0	0	0	1	295	0	1	1.5	0	1	63	1	1
1	1	11	0	0-60	0	1	0	0	0	0	0	0	0	0	0	0	0	0	0	0	0	0	0	0	0	36	0	1	96	0	1	36.7222	0	1	91	0	0	0	0	1	157	0	0	0	0	1	17	0	1
1	1	3	1	>70	4	1	0	0	0	0	0	0	0	0	0	0	0	0	0	0	0	0	0	0	0	76	2	1	90	1	1	36.6111	0	1	76	0	1	1.7	0	1	189	0	1	1	0	1	17	0	1
1	1	11	0	>80	9	0	0	0	1	0	0	0	0	0	0	0	0	0	0	0	0	0	0	0	0	81	3	1	86	1	1	39.4444	1	1	111.333	0	1	3.43	1	1	279	0	1	1.3	1	1	53	1	1
1	1	5	0	>60	3	1	0	0	0	0	1	1	0	0	0	1	1	1	0	0	0	0	0	0	0	62	1	1	90	1	1	36.8889	0	1	88.3333	0	1	0.7	0	1	226	0	1	1	0	0	0	0	1
1	1	1	0	0-60	0	0	0	0	1	0	0	0	0	0	0	0	0	0	1	0	0	1	0	0	0	28	0	1	100	0	1	36.2778	0	1	81.3333	0	0	0	0	1	274	0	0	0	0	1	9	0	1
1	1	2	1	>70	7	1	0	0	0	0	0	0	0	0	0	0	0	0	0	0	0	0	0	0	0	71	2	1	91	1	1	37.5	0	1	65.3333	0	0	0	0	1	146	1	1	1.2	0	1	195	1	1
1	1	10	0	>80	4	1	0	0	0	0	0	0	0	0	0	0	0	0	0	0	0	0	0	0	0	84	3	1	92	1	1	38.3889	1	1	101	0	1	1.27	0	1	252	0	1	1	0	1	35	1	1
1	1	1	0	0-60	1	1	0	0	0	0	0	0	0	0	0	0	0	0	1	1	0	0	1	0	0	37	0	1	99	0	1	37.7778	0	1	111	0	0	0	0	1	146	1	1	1.1	0	1	15	0	1
1	1	7	0	0-60	4	1	0	0	0	0	0	0	0	0	0	1	1	1	0	0	0	0	0	0	0	50	0	1	85	1	1	37	0	1	93.6667	0	1	0.74	0	1	142	1	1	1.1	0	1	23	0	1
1	0	0	0	>60	5	1	0	0	0	0	1	1	1	0	0	0	0	0	0	0	0	0	0	0	0	66	1	1	84	1	1	36.5	0	1	73.6667	0	1	1.12	0	1	222	0	1	2.1	0	1	81	1	1
1	1	4	0	>60	3	0	0	0	1	0	0	0	0	0	0	0	0	0	0	0	0	0	0	0	0	61	1	1	93	1	1	38.4444	1	1	96	0	0	0	0	1	213	0	1	1	0	1	8	0	1
1	1	5	0	0-60	0	0	0	0	1	0	0	0	0	0	0	0	0	0	0	0	0	0	0	0	0	52	0	1	94	0	1	36.7222	0	1	101	0	1	0.6	0	1	336	0	1	0.9	0	1	6	0	1
1	1	3	0	0-60	3	1	0	0	0	0	0	0	0	0	0	0	0	0	0	0	0	0	0	0	0	25	0	1	96	0	1	39.2222	1	1	83.6667	0	1	1.46	0	1	138	1	1	1.1	0	1	6	0	1
1	1	2	0	>70	4	1	0	0	0	0	0	0	0	0	0	0	0	0	1	1	0	0	1	0	0	76	2	1	95	0	1	36.7778	0	1	91.3333	0	1	1.99	0	1	117	1	1	1	0	1	16	0	1
1	1	4	0	>80	7	0	0	0	0	0	0	0	0	0	0	0	0	0	0	0	0	0	0	0	0	86	3	1	97	0	1	36.9444	0	1	102.667	0	1	3.57	1	1	171	0	1	1.6	1	1	10	0	1
1	1	25	0	>70	5	0	0	0	1	0	0	1	0	0	0	0	0	0	0	0	0	0	0	0	0	76	2	1	100	0	1	36.9444	0	1	95.3333	0	1	1.64	0	1	301	0	1	1.2	0	1	69	1	1
1	1	2	1	>60	5	0	0	0	1	0	0	0	0	0	0	0	0	0	0	0	0	0	0	0	0	64	1	1	70	1	1	36.5556	0	1	84	0	1	1	0	1	250	0	1	1.1	0	1	68	1	1
1	0	0	0	>60	5	1	0	0	0	0	0	0	0	0	0	0	0	0	0	0	0	0	0	0	0	62	1	1	11	1	1	37.1667	0	1	77.6667	0	1	7.7	1	1	360	0	1	1.1	1	0	0	0	1
1	1	3	1	>70	7	0	0	0	1	0	0	0	0	0	0	0	0	0	1	1	0	0	1	0	0	71	2	1	84	1	1	39.1667	1	1	89.3333	0	1	5.02	1	1	205	0	1	1.2	1	1	36	1	1
1	1	17	1	>60	4	0	0	0	1	0	0	0	0	0	0	0	0	1	0	0	0	0	0	0	0	62	1	1	81	1	1	39.0556	1	0	0	0	1	5.92	1	1	166	0	1	1.1	1	1	14	0	1
1	1	4	0	0-60	2	0	0	0	1	0	0	0	0	0	0	0	0	0	0	0	0	0	0	0	0	47	0	1	94	0	1	39.1111	1	1	97	0	1	0.95	0	1	225	0	1	1	0	1	7	0	1
1	1	8	0	>70	7	0	0	0	1	0	0	0	0	0	1	0	0	0	1	1	0	0	0	0	0	75	2	1	85	1	1	36.6111	0	1	100.667	0	1	10.9	1	1	274	0	1	1.3	1	1	100	1	1
1	1	9	0	>60	6	0	0	0	0	0	0	0	0	0	0	0	0	0	0	0	0	0	0	0	0	63	1	1	99	0	1	36.4444	0	1	87	0	1	20	1	1	356	0	1	1.4	1	1	82	1	1
1	1	6	1	0-60	2	1	0	0	0	0	0	0	0	0	0	0	0	0	1	1	0	0	0	0	0	60	0	1	98	0	1	37.1667	0	1	101.667	0	1	10.25	1	1	282	0	1	1.1	1	1	37	1	1
1	1	3	0	0-60	0	0	0	0	0	1	0	1	1	1	0	0	1	1	0	0	0	0	0	0	0	59	0	1	95	0	1	37.4444	0	1	92.6667	0	0	0	0	1	324	0	0	0	0	1	15	0	1
1	1	9	0	0-60	3	0	0	0	1	0	0	0	0	0	0	0	0	0	0	0	0	0	0	0	0	55	0	1	100	0	1	36.5556	0	1	78.6667	0	1	3.31	1	1	227	0	1	1.1	1	1	98	1	1
1	1	13	1	>70	7	1	0	0	0	0	0	0	0	0	0	0	0	0	0	0	0	0	0	0	0	77	2	1	100	0	1	37.2222	0	1	77.6667	0	1	20	1	1	327	0	1	1.5	1	1	224	1	1
1	1	6	1	>60	6	1	0	0	0	0	0	0	0	0	0	0	0	0	0	0	0	0	0	0	0	64	1	1	100	0	1	36.5	0	1	103	0	1	20	1	1	129	1	1	17.0001	1	1	35	1	1
1	1	21	1	>70	6	1	0	0	0	0	0	0	0	0	0	0	0	0	0	0	0	0	0	0	0	75	2	1	89	1	1	36.8333	0	1	65	0	1	2.1	0	1	100	1	1	1.1	0	0	0	0	1
1	1	16	1	>70	7	1	0	0	0	0	0	0	0	0	0	0	0	0	0	0	0	0	0	0	0	71	2	1	98	0	1	37.9444	0	1	23.6667	1	1	0.73	0	1	178	0	1	1	0	0	0	0	1
1	1	7	1	0-60	1	1	0	0	0	0	0	1	1	0	0	0	0	1	0	0	0	0	0	0	0	42	0	1	94	0	1	38	0	1	84.6667	0	1	1.36	0	1	251	0	1	1.1	0	0	0	0	1
1	1	10	0	>60	6	1	0	0	0	0	0	0	0	0	0	0	0	0	1	1	0	0	0	0	0	61	1	1	93	1	1	37.1667	0	1	98.6667	0	1	20	1	1	351	0	1	1.3	1	1	10	0	1
1	1	4	0	0-60	1	1	0	0	0	0	0	0	0	0	0	0	0	0	0	0	0	0	0	0	0	49	0	1	90	1	1	36.6667	0	1	101.333	0	0	0	0	1	289	0	1	1	0	1	7	0	1
1	1	12	0	>60	4	0	1	0	0	0	0	1	0	0	0	0	0	1	0	0	0	0	0	0	0	66	1	1	93	1	1	37.1667	0	1	82.6667	0	1	1.09	0	1	251	0	1	1.1	0	1	9	0	1
1	1	16	1	>60	6	1	0	0	0	0	0	0	0	0	0	0	0	0	0	0	0	0	0	0	0	70	1	1	84	1	1	37.2222	0	1	62	0	1	20	1	1	182	0	1	1.3	1	1	20	0	1
1	1	11	0	>70	7	1	0	0	0	0	0	0	0	0	0	0	0	0	0	0	0	0	0	0	0	75	2	1	93	1	1	36.6111	0	1	84.3333	0	1	5.93	1	1	281	0	1	1.1	1	1	41	1	1
1	1	4	0	>60	2	1	0	0	0	0	0	0	0	0	0	0	0	1	0	0	0	0	0	0	0	70	1	1	85	1	1	36.9444	0	1	98.6667	0	1	1.98	0	1	291	0	1	1.1	0	1	11	0	1
1	1	2	0	0-60	1	0	0	0	1	0	0	0	0	0	0	0	0	0	0	0	0	0	0	0	0	60	0	1	98	0	1	36.5556	0	1	92.3333	0	1	1.16	0	1	391	0	1	1	0	1	8	0	1
1	1	2	0	0-60	0	1	0	0	0	0	0	0	0	0	0	0	0	0	0	0	0	0	0	0	0	38	0	1	98	0	1	36.7778	0	1	84	0	1	1.83	0	1	253	0	1	0.9	0	1	7	0	1
1	1	6	1	>60	5	1	0	0	0	0	0	1	0	0	0	0	0	1	1	0	0	1	0	0	0	62	1	1	94	0	1	37.2222	0	1	84.6667	0	1	2.74	0	1	174	0	1	1	0	1	46	1	1
1	1	10	0	0-60	1	0	0	0	0	0	0	0	1	0	0	0	0	0	0	0	0	0	0	0	0	51	0	1	92	1	1	37.6667	0	1	104.667	0	1	0.26999	0	1	189	0	1	0.9	0	1	11	0	1
1	1	2	0	0-60	2	1	0	0	0	1	1	1	0	0	0	1	1	1	0	0	0	0	0	0	0	57	0	1	99	0	1	36.6667	0	1	108	0	0	0	0	1	366	0	1	1	0	1	49	1	1
1	1	3	0	0-60	1	1	0	0	0	0	0	0	0	0	0	0	0	0	0	0	0	0	0	0	0	57	0	1	94	0	1	37.2222	0	1	85	0	1	0.74	0	1	146	1	1	1	0	1	17	0	1
1	1	7	1	>70	6	1	0	0	0	0	0	0	0	0	0	0	0	0	1	1	0	0	0	0	0	80	2	1	96	0	1	37.6667	0	1	53	1	0	0	0	1	299	0	1	1.2	0	1	53	1	1
1	1	5	1	>80	8	0	0	0	1	0	0	0	0	0	0	0	0	0	0	0	0	0	0	0	0	84	3	1	93	1	1	36.6667	0	1	96.6667	0	1	1.55	0	1	221	0	1	1.4	0	1	40	1	1
1	1	5	0	>70	5	1	0	0	0	0	1	0	0	0	0	0	0	0	0	0	0	0	0	0	0	74	2	1	100	0	1	34.5556	0	1	93.3333	0	1	0.88	0	1	245	0	1	1.6	0	1	55	1	1
1	1	4	0	>60	2	0	0	0	0	0	0	0	0	0	0	0	0	0	0	0	0	0	0	0	0	61	1	1	100	0	1	37.8889	0	1	86.6667	0	0	0	0	1	193	0	1	1.1	0	1	26	0	1
1	1	17	0	>60	3	0	1	0	0	0	0	0	0	0	0	1	1	1	0	0	0	0	0	0	0	63	1	1	97	0	1	36.6111	0	1	93.3333	0	1	1.68	0	1	237	0	1	1	0	1	21	0	1
1	1	3	1	>80	6	0	0	0	0	0	0	0	0	0	0	0	0	0	1	1	0	0	1	0	0	90	3	1	91	1	1	36.5	0	1	42.6667	1	0	0	0	1	259	0	1	1	0	1	41	1	1
1	1	10	0	>70	3	1	0	0	0	0	1	1	0	0	0	1	1	1	0	0	0	0	0	0	0	78	2	1	95	0	1	37.3333	0	1	84	0	1	1.98	0	1	321	0	1	1.3	0	1	28	0	1
1	1	12	0	0-60	3	0	0	0	1	0	0	0	0	0	0	1	1	0	0	0	0	0	0	0	0	58	0	1	98	0	1	37.1111	0	1	76	0	1	4.5	1	1	280	0	1	1	1	1	27	0	1
1	1	6	0	0-60	3	0	0	0	0	0	0	0	0	0	0	0	0	1	0	0	0	0	0	0	0	37	0	1	83	1	1	37.1667	0	1	91.3333	0	1	0.77	0	1	198	0	1	1.1	0	1	13	0	1
1	0	0	0	>60	4	1	0	0	0	0	0	0	0	0	0	0	0	0	0	0	0	0	0	0	0	66	1	1	90	1	1	38.3333	1	1	92.3333	0	1	1.86	0	1	243	0	1	1	0	1	17	0	1
1	1	13	0	>70	5	1	0	0	0	0	0	0	0	0	0	0	0	0	1	1	0	0	0	0	0	77	2	1	95	0	1	36.8889	0	1	99.3333	0	1	3.94	1	1	206	0	1	1	1	1	60	1	1
1	1	2	1	>60	5	1	0	0	0	0	0	0	0	0	0	0	0	0	0	0	0	0	0	0	0	64	1	1	100	0	1	37.5	0	1	64.3333	0	0	0	0	1	252	0	1	1.3	0	1	185	1	1
1	1	2	0	0-60	0	0	0	0	1	0	1	0	0	0	0	0	0	0	0	0	0	0	0	0	0	34	0	1	100	0	1	36.4444	0	1	97	0	0	0	0	1	344	0	0	0	0	1	6	0	1
1	1	2	0	0-60	0	1	0	0	0	0	1	0	0	0	0	0	0	0	0	0	0	0	0	0	0	26	0	0	100	0	0	36.7778	0	1	92.6667	0	0	0	0	0	453	0	0	0	0	1	12	0	1
1	1	8	0	>60	2	0	1	0	0	0	0	0	0	0	0	0	0	0	0	0	0	0	0	0	0	67	1	1	91	1	1	37.7222	0	1	102.333	0	1	2.04	0	1	254	0	1	1	0	1	20	0	1
1	1	41	1	>70	6	1	0	0	0	0	0	0	1	0	0	0	0	0	1	1	0	0	0	1	0	74	2	1	90	1	1	37.1667	0	1	63.3333	0	1	5.48	1	1	166	0	1	1	1	1	29	0	1
1	1	2	0	0-60	0	0	0	0	0	0	0	0	0	0	0	0	0	0	0	0	0	0	0	0	0	36	0	1	99	0	1	39.3333	1	1	85.6667	0	0	0	0	1	153	0	0	0	0	1	8	0	1
1	1	2	0	0-60	0	1	0	0	0	0	0	0	0	0	0	0	0	0	0	0	0	0	0	0	0	34	0	1	99	0	1	36.5	0	1	74.6667	0	1	2.37	0	1	203	0	1	1	0	1	4.999	0	1
1	1	2	0	>80	4	1	0	0	1	0	1	0	0	0	0	0	0	0	0	0	0	0	0	0	0	87	3	1	97	0	1	36.6111	0	1	90.6667	0	0	0	0	1	190	0	1	1.2	0	1	13	0	1
1	1	3	1	>60	5	0	0	0	1	0	0	1	1	0	0	0	0	1	1	1	0	0	0	0	0	63	1	1	93	1	1	37.5	0	1	51.6667	1	0	0	0	1	250	0	1	1.2	0	1	66	1	1
1	1	11	0	>60	3	0	0	0	1	0	1	1	0	0	0	1	1	1	0	0	0	0	0	0	0	69	1	1	98	0	1	36.8333	0	1	69.6667	0	1	0.69	0	1	128	1	1	1.4	0	1	32	1	1
1	1	8	0	>80	4	0	0	0	0	0	0	0	0	0	0	0	0	0	0	0	0	0	0	0	0	89	3	1	96	0	1	36.7778	0	1	85.3333	0	1	9.42	1	1	365	0	1	1	1	1	39	1	1
1	0	0	0	>80	3	0	0	0	0	0	1	0	0	0	0	0	0	0	0	0	0	0	0	0	0	85	3	1	97	0	1	36.1111	0	1	89	0	1	2.83	0	1	279	0	1	1.2	0	1	19	0	1
1	1	7	1	>60	4	1	0	0	0	0	0	0	0	0	0	0	0	0	0	0	0	0	0	0	0	69	1	1	99	0	1	37.1667	0	1	59.6667	1	1	20	1	1	157	0	1	1	1	0	0	0	1
1	1	25	0	>60	3	0	0	0	0	0	0	0	1	0	0	0	0	0	1	1	0	0	0	0	0	70	1	1	94	0	1	37.1111	0	1	82.3333	0	1	1.39	0	1	318	0	1	1	0	1	44	1	1
1	1	15	1	>70	7	0	1	0	0	0	0	1	0	0	0	0	0	1	0	0	0	0	0	0	0	80	2	1	88	1	1	36.7222	0	1	61.6667	0	1	20	1	1	173	0	1	1.2	1	0	0	0	1
1	1	4	0	>80	5	0	0	0	1	0	0	0	0	0	0	0	0	0	0	0	0	0	0	0	0	83	3	1	93	1	1	39.3889	1	1	91.3333	0	1	1.69	0	1	291	0	1	1.1	0	1	18	0	1
1	1	7	0	>80	6	1	0	0	0	0	0	0	0	0	0	0	0	0	0	0	0	0	0	0	0	81	3	1	94	0	1	37	0	1	98.6667	0	1	3.47	1	1	278	0	1	1.1	1	1	11	0	1
1	1	5	0	>60	3	0	0	0	1	0	1	0	1	1	0	0	0	0	0	0	0	0	0	0	0	62	1	1	94	0	1	39.5556	1	1	103	0	1	0.8	0	1	179	0	1	1	0	1	13	0	1
1	1	3	0	>60	1	1	0	0	0	0	0	0	0	0	0	0	0	0	0	0	0	0	0	0	0	64	1	1	96	0	1	36.3889	0	1	108	0	1	0.74	0	1	314	0	1	0.9	0	1	11	0	1
1	1	14	0	0-60	3	0	0	0	1	0	0	0	0	1	0	0	0	0	0	0	0	0	0	0	0	47	0	1	54	1	1	36.8889	0	1	78	0	1	2.51	0	1	428	0	1	1.1	0	1	9	0	1
1	1	15	1	0-60	6	0	0	0	1	0	0	0	0	0	1	0	0	0	0	0	0	0	0	0	0	37	0	1	76	1	1	39.2222	1	1	29.3333	1	1	4.61	1	1	108	1	1	1.2	1	1	12	0	1
1	0	0	0	>70	4	1	0	0	0	0	1	0	0	0	0	0	0	0	0	0	0	0	0	0	0	80	2	1	99	0	1	37	0	1	94.6667	0	1	1.59	0	1	137	1	1	2.1	0	1	5	0	1
1	1	7	1	>70	4	1	0	0	0	0	0	0	0	0	0	0	0	0	0	0	0	0	0	0	0	72	2	1	96	0	1	36.5	0	1	86.3333	0	1	20	1	1	327	0	1	1.3	1	1	24	0	1
1	1	9	0	0-60	1	1	0	0	0	0	0	0	0	0	0	0	0	1	0	0	0	0	0	0	0	33	0	1	93	1	1	39.5	1	1	71	0	1	0.9	0	1	212	0	1	1	0	1	7	0	1
1	1	3	0	0-60	0	0	0	0	1	0	0	0	1	0	0	1	1	1	0	0	0	0	0	0	0	53	0	1	96	0	1	37.2222	0	1	80.3333	0	1	0.3	0	1	239	0	1	1	0	1	21	0	1
1	1	5	0	0-60	2	0	0	0	0	0	0	0	0	0	0	0	0	0	0	0	0	0	0	0	0	33	0	1	95	0	1	38.2222	1	1	91.6667	0	1	1.61	0	1	214	0	1	1.1	0	1	16	0	1
1	1	14	0	>60	3	0	0	0	1	0	0	1	0	0	0	0	0	1	0	0	0	0	0	0	0	65	1	1	95	0	1	37.6667	0	1	98	0	1	0.48	0	1	205	0	1	1	0	1	40	1	1
1	1	3	0	>70	2	0	0	0	1	0	1	1	0	0	0	0	0	1	0	0	0	0	0	0	0	78	2	1	100	0	1	36.5	0	1	92	0	1	1	0	1	264	0	1	1.1	0	1	17	0	1
1	1	20	1	0-60	5	1	0	0	0	0	0	0	0	0	0	0	0	0	0	0	0	0	0	0	0	54	0	1	93	1	1	37.8889	0	1	84.6667	0	1	20	1	1	213	0	1	1	1	1	88	1	1
1	1	1	0	0-60	2	0	0	0	1	0	0	0	0	0	0	0	0	0	0	0	0	0	0	0	0	49	0	1	97	0	1	37.3333	0	1	98	0	0	0	0	1	0	2	0	0	0	0	0	0	0
1	1	13	0	>70	5	1	0	0	0	0	0	0	0	0	0	0	0	0	0	0	0	0	0	0	0	76	2	1	99	0	1	37.3333	0	1	109.667	0	1	2.68	0	1	265	0	1	1.2	0	1	175	1	1
1	1	9	0	>70	4	1	0	0	0	0	0	0	0	0	0	0	0	0	1	1	0	0	0	0	0	72	2	1	100	0	1	37.8333	0	1	73.3333	0	1	0.79	0	1	155	0	1	1.4	0	1	13	0	1
1	1	17	0	>60	7	1	0	0	0	0	0	0	0	0	0	0	0	0	0	0	0	0	0	0	0	64	1	1	98	0	1	36.2222	0	1	88	0	1	10.3	1	1	325	0	1	2	1	0	0	0	1
1	1	8	1	>80	7	0	0	0	1	0	0	0	0	0	0	0	0	1	1	1	0	0	1	0	0	86	3	1	89	1	1	36.7222	0	1	80.6667	0	1	20	1	1	217	0	1	1.2	1	1	18	0	1
1	1	2	0	>60	4	1	0	0	0	0	0	0	0	0	0	0	0	0	0	0	0	0	0	0	0	65	1	1	91	1	1	36.6667	0	1	106.333	0	1	2.81	0	1	199	0	1	1.2	0	1	32	1	1
1	1	3	0	>80	3	0	0	0	1	0	0	0	0	0	0	0	0	0	0	0	0	0	0	0	0	81	3	1	98	0	1	36.3889	0	1	86.3333	0	1	1.41	0	1	357	0	1	1	0	1	8	0	1
1	1	7	0	0-60	1	1	0	0	0	0	0	0	0	0	0	0	0	0	0	0	0	0	0	0	0	42	0	1	88	1	1	37.1667	0	1	102.333	0	1	0.57	0	1	242	0	1	1	0	1	11	0	1
1	1	5	1	>70	7	1	0	0	0	0	0	0	0	0	0	0	0	0	1	1	0	0	0	0	0	78	2	1	100	0	1	34.9444	0	1	41	1	0	0	0	1	108	1	1	1.1	0	1	43	1	1
1	1	2	0	>80	4	0	1	0	0	0	1	0	0	0	0	0	0	0	0	0	0	0	0	0	0	85	3	1	98	0	1	36.8889	0	1	80.6667	0	0	0	0	1	312	0	1	1.2	0	1	29	0	1
1	0	0	0	0-60	4	0	1	0	0	0	0	0	0	0	0	0	0	0	0	0	0	0	0	0	0	54	0	1	100	0	1	37.0556	0	1	74.3333	0	1	10.99	1	1	222	0	1	1.5	1	1	14	0	1
1	0	0	0	>60	6	1	0	0	0	0	1	0	1	1	0	1	1	0	0	0	0	0	0	0	0	67	1	1	95	0	1	36.1111	0	1	79	0	1	10.21	1	1	520	0	1	1.6	1	1	62	1	1
1	1	4	1	>80	7	0	0	0	1	0	0	0	0	0	0	0	0	0	0	0	0	0	0	0	0	88	3	1	85	1	1	37.8333	0	1	54.3333	1	1	1.51	0	1	238	0	1	1.1	0	1	21	0	1
1	1	8	0	>70	2	1	0	0	0	0	0	0	0	0	0	0	0	0	1	0	0	1	0	0	0	75	2	1	100	0	1	36.6111	0	1	90.3333	0	0	0	0	1	181	0	1	1.2	0	1	7	0	1
1	1	1	0	0-60	0	0	1	0	1	1	0	0	0	0	0	0	1	0	0	0	0	0	0	0	0	23	0	1	100	0	1	36.8333	0	1	98	0	0	0	0	1	239	0	1	0.9	0	1	9	0	1
1	1	6	0	0-60	3	0	0	1	0	0	0	0	0	0	0	0	0	0	0	0	0	0	0	0	0	58	0	1	78	1	1	38.1667	1	1	94.3333	0	1	1.5	0	1	270	0	1	1.2	0	1	24	0	1
1	1	4	1	>70	6	0	1	0	1	0	0	0	0	0	0	0	0	0	0	0	0	0	0	0	0	73	2	1	77	1	1	36.3333	0	1	92.3333	0	1	20	1	1	250	0	1	1.2	1	1	31	1	1
1	0	0	0	>60	7	1	0	0	0	1	1	1	1	1	0	0	1	0	0	0	0	0	0	0	0	69	1	1	90	1	1	38.7778	1	1	83.6667	0	1	12.7	1	1	236	0	1	1.1	1	1	99	1	1
1	1	12	0	>70	3	1	0	0	0	0	0	0	0	0	0	0	0	0	0	0	0	0	0	0	0	71	2	1	100	0	1	36.2778	0	1	73.3333	0	1	3.49	1	1	157	0	1	1.1	1	1	20	0	1
1	0	0	0	>70	6	1	0	0	0	0	0	0	0	0	0	0	0	0	0	0	0	0	0	0	0	75	2	1	100	0	1	36.7778	0	1	84.3333	0	1	2.85	0	1	300	0	1	1.4	0	1	37	1	1
1	1	7	1	>70	5	0	0	0	0	0	0	0	0	0	1	0	0	0	0	0	0	0	0	0	0	77	2	1	78	1	1	37.8333	0	1	34	1	1	0.41	0	1	188	0	1	0.9	0	1	19	0	1
1	1	9	0	0-60	1	1	0	0	0	0	0	0	0	0	0	0	0	0	0	0	0	0	0	0	0	55	0	1	96	0	1	38.7222	1	1	82.6667	0	1	0.51	0	1	157	0	1	1	0	1	15	0	1
1	0	0	0	0-60	3	1	0	0	0	0	0	0	0	0	0	0	0	0	0	0	0	0	0	0	0	33	0	1	50	1	1	38.7222	1	1	108	0	1	1.82	0	1	234	0	1	1.1	0	1	12	0	1
1	1	3	0	0-60	2	0	0	0	1	0	0	0	1	0	0	0	0	0	0	0	0	0	0	0	0	56	0	1	97	0	1	37.1111	0	1	97	0	1	1.28	0	1	179	0	1	1	0	1	11	0	1
1	1	36	1	0-60	7	0	0	0	0	0	0	0	0	0	0	0	0	0	0	0	0	0	0	0	0	18	0	1	96	0	1	36.8889	0	1	53.6667	1	1	2.27	0	1	125	1	1	1.3	0	0	0	0	1
1	1	1	0	0-60	0	1	0	0	0	0	0	0	1	0	0	0	0	0	0	0	0	0	0	0	0	36	0	1	100	0	1	37	0	1	83.3333	0	1	2.92	0	1	220	0	1	1	0	1	6	0	1
1	1	4	1	>60	8	1	0	0	0	0	0	0	0	0	0	0	0	0	1	1	0	0	1	0	0	65	1	1	98	0	1	34.5556	0	1	56.3333	1	1	4.3	1	1	115	1	1	1.1	1	1	47	1	1
1	1	17	0	>70	5	0	0	0	1	0	0	0	1	0	0	0	0	0	0	0	0	0	0	0	0	74	2	1	91	1	1	38.8333	1	1	86.6667	0	1	0.65	0	1	130	1	1	1	0	0	0	0	1
1	1	11	0	>70	2	0	0	0	1	0	1	0	0	0	0	1	1	0	0	0	0	0	0	0	0	76	2	1	97	0	1	37.7778	0	1	81.6667	0	0	0	0	1	170	0	1	1.1	0	1	18	0	1
1	1	6	0	>60	5	0	0	0	1	0	1	0	0	0	0	0	0	0	0	0	0	0	0	0	0	63	1	1	91	1	1	36.8333	0	1	83.6667	0	1	2.82	0	1	336	0	1	1.1	0	1	25	0	1
1	1	8	1	>80	6	0	0	0	1	0	0	0	0	0	0	0	0	0	1	1	0	0	0	0	0	83	3	0	0	1	0	0	0	0	0	0	1	0.45	0	1	116	1	1	1	0	1	13	0	1
1	1	16	0	0-60	4	1	0	0	0	0	0	0	0	0	0	0	0	0	0	0	0	0	0	0	0	51	0	1	85	1	1	37.6111	0	1	94.3333	0	1	2.42	0	1	252	0	1	1	0	0	0	0	1
1	1	11	0	>70	6	0	0	0	1	0	0	0	0	0	1	0	0	0	0	0	0	0	0	0	0	80	2	1	89	1	1	36.5	0	1	89.3333	0	1	3.71	1	1	421	0	1	1.1	1	1	96	1	1
1	1	9	0	>70	6	0	1	0	0	0	0	1	0	0	1	0	0	0	0	0	0	0	0	0	0	77	2	1	91	1	1	37.1667	0	1	105.667	0	1	12.57	1	1	257	0	1	1	1	1	41	1	1
1	0	0	0	>70	4	1	0	0	0	0	0	0	0	0	0	0	0	0	0	0	0	0	0	0	0	77	2	1	98	0	1	36.8333	0	1	109.667	0	1	2.75	0	1	402	0	1	0.9	0	1	44	1	1
1	0	0	0	>60	2	1	0	0	0	0	1	1	0	0	0	0	0	0	0	0	0	0	0	0	0	63	1	1	100	0	1	36.6667	0	1	93.6667	0	1	1.9	0	1	403	0	1	1.3	0	1	29	0	1
1	1	7	0	>80	5	0	0	0	1	0	0	0	0	0	0	0	0	0	0	0	0	0	0	0	0	83	3	1	90	1	1	37.7222	0	1	85.6667	0	1	1.13	0	1	192	0	1	1.1	0	1	5	0	1
1	1	1	0	0-60	0	0	0	0	1	0	1	0	0	0	0	0	0	0	0	0	0	0	0	0	0	55	0	1	98	0	1	36.7778	0	1	86.3333	0	1	0.34	0	1	318	0	1	1	0	1	10	0	1
1	1	15	0	>70	6	0	1	0	0	0	0	0	0	0	0	0	0	0	0	0	0	0	0	0	0	72	2	1	84	1	1	37.4444	0	1	79.3333	0	1	0.71	0	1	135	1	1	1.1	0	1	12	0	1
1	1	10	0	>60	2	0	0	0	1	0	1	0	0	0	0	0	0	0	0	0	0	0	0	0	0	69	1	1	94	0	1	37.0556	0	1	101.333	0	1	1.71	0	1	229	0	1	1	0	1	9	0	1
1	0	0	0	0-60	0	0	0	0	1	0	1	0	0	0	0	0	0	0	0	0	0	0	0	0	0	57	0	1	95	0	1	36.6667	0	1	103	0	1	1.1	0	1	160	0	1	1	0	1	5	0	1
1	0	0	0	>80	5	0	0	0	1	0	1	0	0	0	0	0	0	0	0	0	0	0	0	0	0	82	3	1	100	0	1	36.1111	0	1	70.6667	0	1	0.89	0	1	192	0	1	2.3	0	1	63	1	1
1	0	0	0	>70	5	0	0	0	1	0	2	0	1	1	0	0	0	0	0	0	0	0	0	0	0	75	2	1	96	0	1	37.6111	0	1	90.6667	0	1	12.42	1	1	264	0	1	1.4	1	1	15	0	1
1	1	6	0	>70	2	1	0	0	0	0	0	0	0	0	0	0	0	1	0	0	0	0	0	0	0	75	2	1	97	0	1	37	0	1	96.6667	0	0	0	0	1	171	0	1	1	0	1	12	0	1
1	1	4	0	0-60	0	1	0	0	0	0	0	0	0	0	0	0	0	0	1	1	0	0	1	0	0	55	0	1	96	0	1	37.1111	0	1	88.3333	0	0	0	0	1	192	0	1	1	0	1	13	0	1
1	1	14	0	0-60	0	1	0	0	0	0	0	0	0	0	0	0	0	1	0	0	0	0	0	0	0	18	0	1	100	0	1	37	0	1	87	0	0	0	0	1	213	0	0	0	0	1	13	0	1
1	1	4	0	0-60	1	1	0	0	0	1	1	1	1	0	0	0	1	1	0	0	0	0	0	0	0	41	0	1	98	0	1	36.6667	0	1	95.3333	0	0	0	0	1	249	0	0	0	0	0	0	0	0
1	1	3	0	0-60	3	1	0	0	0	0	0	0	0	0	0	0	0	0	0	0	0	0	0	0	0	50	0	1	87	1	1	37.3889	0	1	95.6667	0	1	2.65	0	1	182	0	1	1	0	1	18	0	1
1	1	5	0	>70	3	1	0	0	0	0	0	0	0	0	0	0	0	0	0	0	0	0	0	0	0	74	2	1	94	0	1	36.4444	0	1	87.6667	0	1	0.89	0	1	166	0	1	1.1	0	1	15	0	1
1	1	7	0	0-60	0	1	0	0	0	0	0	0	0	0	0	0	0	1	0	0	0	0	0	0	0	58	0	1	94	0	1	35.6667	0	1	89.3333	0	0	0	0	1	181	0	0	0	0	1	19	0	1
1	1	9	0	>60	6	1	0	0	0	0	0	0	0	0	0	1	1	0	0	0	0	0	0	0	0	64	1	1	95	0	1	36.6667	0	1	69	0	1	3	0	1	208	0	1	1.3	0	1	97	1	1
1	1	6	0	0-60	3	1	0	0	0	0	0	0	0	0	0	0	0	0	0	0	0	0	0	0	0	40	0	1	92	1	1	37.3333	0	1	102.667	0	1	20	1	1	258	0	1	1.1	1	1	27	0	1
1	1	4	0	>70	3	0	0	0	1	0	1	0	0	0	0	1	1	0	0	0	0	0	0	0	0	74	2	1	93	1	1	37.3333	0	1	82.6667	0	1	1.05	0	1	249	0	1	1.2	0	1	5	0	1
1	1	11	0	0-60	3	0	0	0	1	0	0	0	0	0	0	0	0	1	0	0	0	0	0	0	0	54	0	1	76	1	1	37.0556	0	1	86.6667	0	1	0.69	0	1	366	0	1	1.1	0	1	16	0	1
1	1	3	0	>70	4	1	0	0	0	0	1	0	1	0	0	0	1	1	0	0	0	0	0	0	0	74	2	1	97	0	1	36.6667	0	1	96.6667	0	1	5.31	1	1	324	0	1	1	1	1	26	0	1
1	1	5	0	0-60	4	0	0	0	0	0	0	0	0	0	0	0	0	0	0	0	0	0	0	0	0	47	0	1	83	1	1	37.1111	0	1	104	0	1	2.73	0	1	439	0	1	0.9	0	1	42	1	1
1	1	12	1	>70	7	0	0	0	1	0	0	1	0	1	1	0	0	1	0	0	0	0	0	0	0	77	2	1	82	1	1	38.5	1	1	119.667	0	1	1.82	0	1	122	1	1	1.1	0	1	67	1	1
1	0	0	0	>80	7	0	1	0	0	0	1	0	0	0	0	0	0	0	0	0	0	0	0	0	0	82	3	1	51	1	1	36.5	0	1	91.6667	0	1	9.49	1	1	476	0	1	1.2	1	1	30	0	1
1	1	3	0	>80	4	0	0	0	1	1	0	0	0	0	1	0	1	0	0	0	0	0	0	0	0	85	3	1	98	0	1	36.7222	0	1	79.3333	0	1	3.19	1	1	275	0	1	1	1	1	11	0	1
1	1	1	1	>80	4	1	0	0	0	0	0	0	0	0	0	0	0	0	0	0	0	0	0	0	0	93	3	1	97	0	1	36.6667	0	1	85	0	0	0	0	1	379	0	1	1.1	0	1	58	1	1
1	1	9	0	0-60	1	0	0	0	1	0	1	0	0	0	0	0	0	0	0	0	0	0	0	0	0	18	0	0	0	1	0	0	0	0	0	0	0	0	0	0	0	0	0	0	0	0	0	0	0
1	1	12	1	0-60	4	1	0	0	0	0	0	0	0	0	1	0	0	0	0	0	0	0	0	0	0	59	0	1	95	0	1	38.8889	1	1	88.3333	0	1	1.96	0	1	46	2	1	1.2	0	1	16	0	1
1	1	2	0	>60	3	1	0	0	0	0	0	0	0	0	0	0	0	1	0	0	0	0	0	0	0	68	1	1	96	0	1	38.3333	1	1	88.6667	0	0	0	0	1	196	0	1	1	0	1	12	0	1
1	1	8	1	>80	9	0	1	0	0	0	0	0	0	0	0	0	0	0	0	0	0	0	0	0	0	83	3	1	84	1	1	37.1111	0	1	77	0	1	2.21	0	1	269	0	1	3	0	1	65	1	1
1	0	0	0	>60	5	0	0	1	0	0	1	0	0	0	0	0	0	0	0	0	0	0	0	0	0	65	1	1	73	1	1	36.3889	0	1	69.6667	0	1	4.15	1	1	382	0	1	1.2	1	1	19	0	1
1	1	2	1	0-60	6	0	0	0	1	0	0	0	0	0	0	0	0	0	1	0	0	1	0	0	0	59	0	1	90	1	1	39.7778	1	1	76	0	0	0	0	1	148	1	1	1.8	0	1	68	1	1
1	1	7	0	>70	5	0	1	0	1	0	0	0	0	0	0	0	0	0	0	0	0	0	0	0	0	71	2	1	92	1	1	37.2222	0	1	93.3333	0	1	2.03	0	1	125	1	1	1.1	0	1	13	0	1
1	1	8	0	0-60	2	1	0	0	0	0	0	0	0	0	0	0	0	0	0	0	0	0	0	0	0	51	0	1	93	1	1	36.3333	0	1	76.3333	0	1	1.1	0	1	321	0	1	1	0	1	23	0	1
1	1	12	0	0-60	3	0	0	0	1	0	0	0	0	0	0	0	0	0	0	0	0	0	0	0	0	37	0	1	97	0	1	36.1111	0	1	96.6667	0	1	0.84	0	1	170	0	1	1.1	0	1	49	1	1
1	1	1	0	>60	3	1	0	0	0	0	0	0	0	0	0	0	0	0	0	0	0	0	0	0	0	66	1	1	90	1	1	38.0556	1	1	90.6667	0	1	0.33	0	1	314	0	1	1	0	1	13	0	1
1	1	10	0	>80	3	0	0	0	1	0	0	0	1	0	0	0	0	1	0	0	0	0	0	0	0	94	3	1	99	0	1	36.6111	0	1	101	0	0	0	0	1	219	0	1	1.1	0	1	17	0	1
1	1	3	0	>60	2	0	0	0	1	0	0	0	0	0	0	0	0	0	0	0	0	0	0	0	0	69	1	1	100	0	1	37.6111	0	1	77.6667	0	1	1	0	1	212	0	1	1	0	1	12	0	1
1	1	8	0	>70	7	1	0	0	0	0	0	0	0	0	0	0	0	0	0	0	0	0	0	0	0	77	2	1	88	1	1	36.3889	0	1	94.6667	0	1	2.02	0	1	257	0	1	1.2	0	1	52	1	1
1	1	4	0	>60	4	0	0	0	1	0	0	0	0	0	0	0	0	0	1	1	0	0	0	0	0	64	1	1	90	1	1	37.7222	0	1	98.3333	0	1	1.58	0	1	271	0	1	1.1	0	1	25	0	1
1	1	10	0	>70	7	1	0	0	0	0	0	0	0	0	0	0	0	0	0	0	0	0	0	0	0	74	2	1	97	0	1	39.2778	1	1	94	0	1	5.85	1	1	140	1	1	1	1	1	37	1	1
1	1	5	0	>80	6	0	0	0	0	0	0	0	0	0	0	0	0	0	0	0	0	0	0	0	0	83	3	1	96	0	1	36.1667	0	1	81.3333	0	1	4.76	1	1	153	0	1	0.9	1	1	42	1	1
1	1	21	0	0-60	0	1	0	0	0	0	0	0	0	0	0	0	0	0	0	0	0	0	0	0	0	46	0	1	94	0	1	37.5	0	1	86.3333	0	1	0.49	0	1	204	0	1	1.1	0	0	0	0	1
1	1	30	1	>70	8	1	0	0	1	0	0	0	0	0	0	0	0	0	0	0	0	0	0	0	0	74	2	1	95	0	1	37.6667	0	1	98.6667	0	1	16.49	1	1	142	1	1	1.2	1	0	0	0	1
1	1	2	0	0-60	0	1	0	0	0	0	1	0	0	0	0	0	0	0	0	0	0	0	0	0	0	29	0	1	97	0	1	36.8333	0	1	94	0	1	1	0	1	183	0	0	0	0	1	7	0	1
1	1	7	0	0-60	2	0	1	0	0	0	0	0	0	0	0	0	0	0	0	0	0	0	0	0	0	42	0	1	92	1	1	38.7222	1	1	95.6667	0	1	1.19	0	1	219	0	1	1.1	0	1	13	0	1
1	1	5	0	>80	5	0	0	0	0	0	0	0	0	0	0	0	0	0	0	0	0	0	0	0	0	85	3	1	95	0	1	37.3889	0	1	78	0	1	0.54	0	1	199	0	1	1.1	0	1	16	0	1
1	1	6	0	>70	4	0	1	0	1	0	0	0	0	0	0	0	0	0	0	0	0	0	0	0	0	77	2	1	92	1	1	37.7778	0	1	79	0	1	0.55	0	1	140	1	1	1.2	0	1	9	0	1
1	1	22	0	0-60	0	0	0	0	0	0	0	0	1	0	0	0	0	1	0	0	0	0	0	0	0	50	0	1	96	0	1	36.8333	0	1	87	0	0	0	0	1	162	0	0	0	0	1	21	0	1
1	1	2	1	>70	7	0	0	0	0	0	0	0	0	0	0	0	0	0	0	0	0	0	0	0	0	71	2	1	77	1	1	36.7778	0	1	102.333	0	1	4.44	1	1	183	0	1	1.1	1	1	79	1	1
1	1	5	0	>80	4	1	0	0	0	0	0	0	0	0	0	1	1	0	1	1	0	0	0	0	0	81	3	1	91	1	1	36.7222	0	1	75.3333	0	1	0.91	0	1	221	0	1	1.1	0	1	22	0	1
1	1	1	0	0-60	2	0	0	0	1	0	0	0	0	0	0	0	0	0	0	0	0	0	0	0	0	57	0	1	96	0	1	37.7222	0	1	91	0	1	0.28	0	1	144	1	1	1.2	0	1	16	0	1
1	1	2	0	0-60	1	1	0	0	0	0	0	0	0	0	0	0	0	0	0	0	0	0	0	0	0	38	0	0	0	1	0	0	0	0	0	0	0	0	0	0	0	0	0	0	0	0	0	0	0
1	1	4	0	>60	1	0	0	0	1	0	0	0	0	0	0	0	0	0	1	1	0	0	1	0	0	65	1	1	98	0	1	36.9444	0	1	98.6667	0	0	0	0	1	224	0	1	1	0	1	21	0	1
1	1	18	0	>80	4	1	0	0	0	0	0	0	0	0	0	0	0	0	1	1	0	0	0	0	0	82	3	0	0	1	0	0	0	0	0	0	1	2.58	0	1	236	0	0	0	0	1	18	0	1
1	1	3	0	>60	1	1	0	0	0	0	1	0	0	0	0	0	0	0	0	0	0	0	0	0	0	61	1	1	100	0	1	36.9444	0	1	97.3333	0	1	0	0	1	180	0	1	1	0	1	14	0	1
1	1	5	1	>70	8	1	0	0	0	0	0	0	0	0	1	0	0	0	0	0	0	0	0	0	0	77	2	1	78	1	1	37.1111	0	1	60.6667	1	1	20	1	1	178	0	1	1.1	1	1	23	0	1
1	1	25	1	>60	3	0	0	1	0	0	1	1	0	0	0	0	0	1	0	0	0	0	0	0	0	64	1	1	98	0	1	37.1111	0	1	89	0	1	1.21	0	1	123	1	1	1	0	0	0	0	1
1	1	3	0	>60	2	1	0	0	0	0	0	0	0	0	0	0	0	0	0	0	0	0	0	0	0	70	1	1	97	0	1	39.3889	1	1	94.6667	0	1	0.65	0	1	249	0	1	1	0	0	0	0	1
1	0	0	0	>80	3	0	1	0	1	0	1	0	1	0	0	0	0	0	0	0	0	0	0	0	0	93	3	1	95	0	1	36.4444	0	1	85.3333	0	1	2.36	0	1	279	0	1	1.2	0	1	21	0	1
1	1	2	0	0-60	1	0	0	0	1	0	0	0	0	0	0	0	0	0	0	0	0	0	0	0	0	44	0	1	98	0	1	39.1111	1	1	91	0	0	0	0	1	115	1	1	1	0	1	13	0	1
1	1	1	0	>80	3	1	0	0	0	0	0	0	0	0	0	0	0	0	0	0	0	0	0	0	0	82	3	1	97	0	1	37.2778	0	1	74.6667	0	1	0.44	0	1	162	0	1	1	0	1	25	0	1
1	1	15	1	0-60	6	1	0	0	0	0	0	0	0	0	0	0	0	0	0	0	0	0	0	0	0	57	0	1	81	1	1	37.2222	0	1	77	0	1	11.2	1	1	422	0	1	1.2	1	1	61	1	1
1	1	25	1	>60	8	1	0	0	0	0	0	0	0	0	0	0	0	0	1	1	0	0	0	1	0	70	1	1	86	1	1	37.5556	0	1	55.6667	1	1	20	1	1	196	0	1	1.8	1	0	0	0	1
1	1	6	0	>70	5	0	0	0	1	0	1	1	1	0	0	1	1	0	0	0	0	0	0	0	0	72	2	1	96	0	1	37.0556	0	1	94.3333	0	1	5.2	1	1	353	0	1	1.1	1	1	10	0	1
1	1	2	0	0-60	1	0	0	0	1	0	0	0	0	0	0	0	0	0	0	0	0	0	0	0	0	45	0	1	97	0	1	36.5556	0	1	98.3333	0	1	1.09	0	1	395	0	1	1.3	0	1	5	0	1
1	1	3	0	0-60	0	0	0	0	1	0	0	0	0	0	1	0	0	0	1	0	0	1	0	0	0	56	0	1	96	0	1	37.1667	0	1	77	0	1	1.04	0	1	180	0	1	1	0	1	11	0	1
1	0	0	0	>80	4	1	0	0	0	0	0	0	0	0	0	0	0	0	0	0	0	0	0	0	0	90	3	1	99	0	1	36.6667	0	1	77	0	1	6.22	1	1	209	0	1	1.1	1	1	23	0	1
1	1	16	1	>80	10	1	0	0	0	0	0	0	0	0	0	0	0	0	0	0	0	0	0	0	0	83	3	1	98	0	1	35.7222	0	1	38.6667	1	1	20	1	1	66	2	1	1.2	1	1	226	1	1
1	1	4	0	>60	3	0	1	0	1	0	1	1	0	1	0	1	1	1	0	0	0	0	0	0	0	63	1	1	95	0	1	37.9444	0	1	103.667	0	1	0.6	0	1	315	0	1	1.3	0	1	14	0	1
1	1	3	0	0-60	1	1	0	0	0	0	0	0	0	0	0	0	0	0	0	0	0	0	0	0	0	43	0	1	96	0	1	39.3889	1	1	130.333	0	1	0.96	0	1	255	0	1	1.1	0	1	15	0	1
1	1	7	0	0-60	3	1	0	0	0	0	1	0	1	0	0	0	0	0	0	0	0	0	0	0	0	58	0	1	89	1	1	37.8889	0	1	84	0	0	0	0	1	133	1	1	0.9	0	1	11	0	1
1	1	4	0	>80	4	0	1	0	0	0	0	0	0	0	0	0	0	0	0	0	0	0	0	0	0	85	3	1	96	0	1	37.2222	0	1	88.3333	0	0	0	0	1	154	0	1	1.3	0	1	22	0	1
1	1	7	1	>60	3	0	0	0	1	0	1	0	0	0	0	0	0	0	0	0	0	0	0	0	0	70	1	1	94	0	1	36.4444	0	1	79.6667	0	1	3.35	1	1	508	0	1	1.1	1	1	15	0	1
1	1	4	0	0-60	1	0	0	0	1	0	0	0	0	0	0	1	1	0	0	0	0	0	0	0	0	54	0	1	97	0	1	36.6667	0	1	81.6667	0	1	0.78	0	1	169	0	1	1.1	0	1	16	0	1
1	1	4	0	>60	2	1	0	0	0	0	0	0	0	0	0	0	0	1	0	0	0	0	0	0	0	67	1	1	85	1	1	37.1111	0	1	101	0	1	1.3	0	1	354	0	1	1.1	0	1	25	0	1
1	1	6	0	0-60	2	0	0	0	1	0	0	0	0	0	0	0	0	0	0	0	0	0	0	0	0	56	0	1	89	1	1	37.1667	0	1	105.667	0	1	1.58	0	1	278	0	1	1.2	0	1	16	0	1
1	1	6	1	>60	4	0	1	0	0	0	0	0	0	0	0	0	0	0	0	0	0	0	0	0	0	68	1	1	81	1	1	36.3889	0	1	69.6667	0	0	0	0	1	253	0	1	1	0	1	62	1	1
1	1	11	0	>80	5	0	0	0	1	0	0	0	0	0	0	0	0	0	0	0	0	0	0	0	0	86	3	1	98	0	1	36.8889	0	1	94	0	1	0.53	0	1	157	0	1	1.2	0	1	26	0	1
1	1	4	0	0-60	1	1	0	0	0	0	0	0	0	0	0	0	0	0	0	0	0	0	0	0	0	45	0	1	99	0	1	39.1667	1	1	106	0	1	1.21	0	1	155	0	1	1.1	0	1	10	0	1
1	1	3	0	0-60	2	0	0	0	0	0	0	0	0	0	0	0	0	0	0	0	0	0	0	0	0	52	0	1	97	0	1	40.1111	1	1	102.667	0	0	0	0	1	133	1	1	1.1	0	1	13	0	1
1	0	0	0	>80	6	1	0	0	0	0	0	0	0	0	0	0	0	0	0	0	0	0	0	0	0	82	3	1	0	1	1	0	0	0	0	0	1	0	0	1	0	2	1	0	0	0	0	0	0
1	1	9	0	0-60	4	1	0	0	0	0	0	0	0	0	0	0	0	0	1	0	1	0	0	0	0	57	0	1	100	0	1	36.3889	0	1	96.3333	0	1	15.16	1	1	322	0	1	1.3	1	1	108	1	1
1	1	8	0	0-60	2	0	0	1	0	1	0	0	1	0	0	1	1	0	0	0	0	0	0	0	0	39	0	1	98	0	1	38.7778	1	1	72.6667	0	1	1.41	0	1	299	0	1	1.1	0	1	10	0	1
1	1	6	0	>70	4	0	1	0	0	0	1	0	0	0	0	0	0	0	0	0	0	0	0	0	0	74	2	1	93	1	1	37.1667	0	1	97	0	1	3.56	1	1	293	0	1	1	1	1	25	0	1
1	1	11	1	>80	5	0	1	0	0	0	0	0	0	0	0	0	0	0	0	0	0	0	0	0	0	85	3	1	98	0	1	36.5	0	1	51.3333	1	1	0.54	0	1	108	1	1	1	0	0	0	0	1
1	1	22	1	0-60	5	0	0	1	0	1	1	1	0	0	0	0	1	0	0	0	0	0	0	0	0	55	0	1	50	1	1	37.6667	0	1	49	1	1	4.66	1	1	248	0	1	1.1	1	1	15	0	1
1	1	5	1	>80	8	0	0	0	1	0	0	0	0	0	0	0	0	0	0	0	0	0	0	0	0	94	3	1	83	1	1	37.0556	0	1	69.3333	0	1	6.24	1	1	191	0	1	1	1	1	62	1	1
1	1	1	1	>60	6	1	0	0	0	0	0	0	0	0	0	0	0	1	1	1	0	0	0	0	0	69	1	1	80	1	1	36.8889	0	1	51.3333	1	0	0	0	1	313	0	1	1.1	0	1	70	1	1
1	1	8	1	>70	7	0	0	0	1	1	1	1	1	1	0	0	1	1	0	0	0	0	0	0	0	77	2	1	80	1	1	39.6667	1	1	40.3333	1	1	3.33	1	1	235	0	1	1.2	1	1	48	1	1
1	1	4	0	>70	3	0	0	0	1	0	2	1	1	0	0	0	1	1	0	0	0	0	0	0	0	72	2	0	0	1	1	-17.7778	0	1	76.6667	0	0	0	0	0	0	0	0	0	0	0	0	0	0
1	1	7	0	>80	7	1	0	0	0	0	0	0	0	0	0	0	0	0	0	0	0	0	0	0	0	90	3	1	100	0	1	36.4444	0	1	105.667	0	1	7.59	1	1	657	0	1	1.3	1	1	70	1	1
1	1	4	0	>60	5	1	0	0	0	0	0	0	0	0	0	0	0	1	0	0	0	0	0	0	0	67	1	1	95	0	1	37.5556	0	1	95.3333	0	1	2.51	0	1	450	0	1	1.3	0	1	65	1	1
1	1	5	0	0-60	0	1	0	0	0	0	0	0	0	1	1	0	0	1	0	0	0	0	0	0	0	60	0	1	97	0	1	37.6667	0	1	91.6667	0	0	0	0	1	179	0	1	1	0	1	11	0	1
1	1	3	0	0-60	0	1	0	0	0	0	0	0	0	0	0	0	0	1	0	0	0	0	0	0	0	56	0	1	98	0	1	36.5556	0	1	92	0	1	2.3	0	1	450	0	1	1	0	1	12	0	1
1	1	10	0	>60	3	1	0	0	0	0	0	0	0	0	0	0	0	0	0	0	0	0	0	0	0	65	1	1	85	1	1	38.0556	1	1	79.3333	0	1	1.84	0	1	163	0	1	1	0	1	19	0	1
1	1	7	1	>80	7	0	0	0	1	0	0	0	0	0	0	0	0	0	0	0	0	0	0	0	0	92	3	1	86	1	1	39.2222	1	1	85.6667	0	1	3.98	1	1	234	0	1	1.1	1	1	16	0	1
1	1	1	1	>80	5	0	0	0	1	0	0	0	0	0	1	0	0	1	1	0	1	0	0	0	0	86	3	1	100	0	1	37.1667	0	1	80.6667	0	0	0	0	1	148	1	0	0	0	1	41	1	1
1	1	4	1	>60	3	0	0	0	1	1	1	0	1	0	0	0	1	0	0	0	0	0	0	0	0	69	1	1	96	0	1	36.8889	0	1	65.6667	0	0	0	0	1	197	0	1	1.1	0	1	11	0	1
1	1	7	0	>70	3	0	0	0	0	0	0	0	0	0	0	0	0	0	0	0	0	0	0	0	0	78	2	1	91	1	1	38.5556	1	1	86.3333	0	1	0.9	0	1	177	0	1	1	0	1	11	0	1
1	1	4	0	0-60	1	0	1	0	1	0	1	0	1	0	0	0	0	0	0	0	0	0	0	0	0	56	0	1	95	0	1	36.5556	0	1	87.6667	0	1	0.4	0	1	160	0	1	1.5	0	1	16	0	1
1	1	27	1	>70	6	1	0	0	0	0	0	0	0	0	0	1	1	1	1	0	1	0	0	0	0	73	2	1	96	0	1	39.4444	1	1	60.6667	0	1	1.52	0	1	5	2	1	1	0	1	18	0	1
1	1	7	0	>70	3	0	0	0	1	0	0	0	0	0	0	0	0	0	0	0	0	0	0	0	0	79	2	1	100	0	1	36.7778	0	1	86.3333	0	1	0.81	0	1	135	1	1	1.2	0	1	21	0	1
1	1	5	0	>60	6	0	0	0	0	0	0	0	0	0	0	0	0	0	0	0	0	0	0	0	0	70	1	1	99	0	1	38.3889	1	1	74.6667	0	1	3.48	1	1	113	1	1	1.4	1	1	16	0	1
1	1	6	1	>70	4	1	0	0	0	0	0	0	0	0	0	0	0	0	1	1	0	0	0	0	0	80	2	1	92	1	1	37.2778	0	1	64.3333	0	0	0	0	1	125	1	1	1	0	1	16	0	1
1	1	5	0	>60	4	1	0	0	0	0	0	0	0	0	0	0	0	0	0	0	0	0	0	0	0	67	1	1	97	0	1	36.8889	0	1	96	0	1	3.41	1	1	421	0	1	1.1	1	1	51	1	1
1	0	0	0	>60	4	0	0	0	1	0	0	0	0	0	1	0	0	0	1	0	1	0	0	0	0	66	1	1	100	0	1	36.3889	0	1	88	0	1	2.94	0	1	199	0	1	1.8	0	1	52	1	1
1	1	5	0	>70	2	0	1	0	0	0	0	0	0	0	0	0	0	0	0	0	0	0	0	0	0	74	2	1	98	0	1	37	0	1	95	0	0	0	0	1	379	0	0	0	0	1	13	0	1
1	1	3	0	0-60	3	1	0	0	0	0	0	0	0	0	0	0	0	0	0	0	0	0	0	0	0	50	0	1	90	1	1	36.7778	0	1	113	0	1	6.86	1	1	287	0	1	1.3	1	0	0	0	1
1	1	2	0	0-60	1	1	0	0	0	0	0	0	0	0	0	0	0	0	0	0	0	0	0	0	0	56	0	1	96	0	1	37.1111	0	1	93	0	0	0	0	1	242	0	0	0	0	1	7	0	1
1	1	11	0	>60	8	1	0	0	0	0	0	0	0	0	0	0	0	0	0	0	0	0	0	0	0	69	1	1	95	0	1	37.0556	0	1	95.3333	0	1	3.92	1	1	51	2	1	1.3	1	1	70	1	1
1	1	7	0	>80	5	0	0	0	1	0	0	0	0	0	0	0	0	0	1	0	1	0	0	0	0	81	3	1	93	1	1	38.3889	1	1	98	0	1	1.18	0	1	409	0	1	1.2	0	1	14	0	1
1	1	10	0	>60	3	0	0	0	1	0	0	1	0	0	0	1	1	1	0	0	0	0	0	0	0	68	1	1	90	1	1	38.8889	1	1	104.333	0	0	0	0	1	142	1	1	1	0	1	13	0	1
1	1	40	1	0-60	5	1	0	0	0	0	0	0	0	0	0	0	0	0	0	0	0	0	0	0	0	41	0	1	91	1	1	37.6667	0	1	32.6667	1	1	3.26	1	1	152	0	1	1.1	1	1	12	0	1
1	1	2	0	>70	3	0	0	0	1	0	0	0	0	0	0	0	0	0	0	0	0	0	0	0	0	77	2	1	93	1	1	37.1111	0	1	84.6667	0	1	1.07	0	1	218	0	1	1.1	0	1	16	0	1
1	1	8	0	>60	5	1	0	0	1	0	0	0	1	0	0	0	0	0	0	0	0	0	0	0	0	62	1	1	92	1	1	38.5	1	1	99	0	1	2.36	0	1	216	0	1	1.4	0	1	21	0	1
1	1	5	0	>60	3	0	0	1	1	1	0	1	1	0	0	0	1	0	0	0	0	0	0	0	0	62	1	1	90	1	1	37	0	1	109.667	0	1	1.31	0	1	472	0	1	1.3	0	1	20	0	1
1	1	7	0	>70	4	0	0	0	0	0	0	0	1	0	1	0	0	0	0	0	0	0	0	0	0	71	2	1	92	1	1	38.1111	1	1	103.667	0	1	0.87	0	1	222	0	1	1	0	1	18	0	1
1	0	0	0	0-60	0	1	0	0	0	0	1	0	0	0	0	0	0	0	0	0	0	0	0	0	0	28	0	1	99	0	1	36.1111	0	1	77.3333	0	1	0.28	0	1	296	0	1	0.9	0	1	14	0	1
1	1	1	0	0-60	0	0	0	0	0	0	0	0	0	0	0	0	0	0	0	0	0	0	0	0	0	51	0	1	95	0	1	36.6111	0	1	95.3333	0	1	0.9	0	1	233	0	1	1	0	1	14	0	1
1	1	16	1	>80	9	0	0	0	0	0	0	0	0	0	0	0	0	0	0	0	0	0	0	0	0	83	3	1	79	1	1	36.6111	0	0	0	0	1	20	1	1	236	0	1	1.5	1	1	62	1	1
1	1	4	0	>60	3	1	0	0	0	0	0	0	0	0	0	0	0	0	1	1	0	0	1	0	0	66	1	1	96	0	1	37.7222	0	1	105.667	0	1	1.13	0	1	151	0	1	1.1	0	1	17	0	1
1	1	2	0	0-60	2	0	0	0	1	0	0	0	0	0	0	0	0	0	0	0	0	0	0	0	0	60	0	1	95	0	1	37.4444	0	1	97	0	1	2.7	0	1	116	1	1	1	0	1	9	0	1
1	1	7	0	>80	4	1	0	0	0	0	0	0	0	0	0	0	0	0	0	0	0	0	0	0	0	84	3	1	92	1	1	37.5	0	1	79.3333	0	1	0.65	0	1	163	0	1	0.9	0	1	17	0	1
1	1	8	1	0-60	3	1	0	0	0	0	0	0	0	0	1	0	0	1	0	0	0	0	0	0	0	52	0	1	94	0	1	39.6667	1	1	67.6667	0	1	0.54	0	1	154	0	1	1	0	1	27	0	1
1	1	5	0	>70	3	1	0	0	0	0	0	0	0	0	0	0	0	0	0	0	0	0	0	0	0	76	2	1	96	0	1	36.1667	0	1	110.667	0	1	1.11	0	1	234	0	1	1	0	0	0	0	1
1	1	5	1	>70	6	1	0	0	0	1	1	1	1	0	1	0	1	1	0	0	0	0	0	0	0	73	2	1	78	1	1	37.0556	0	1	73.3333	0	0	0	0	1	119	1	1	1.2	0	1	87	1	1
1	1	3	0	0-60	0	0	0	0	1	0	0	0	0	0	0	0	0	0	0	0	0	0	0	0	0	52	0	1	100	0	1	38.1111	1	1	97	0	1	0.26999	0	1	174	0	1	1.1	0	1	13	0	1
1	1	2	0	0-60	0	0	0	0	1	0	1	0	0	0	0	0	0	0	0	0	0	0	0	0	0	54	0	1	100	0	1	36.9444	0	1	103.333	0	1	0.3	0	1	359	0	1	1	0	1	12	0	1
1	1	10	0	>70	6	1	0	0	0	0	0	1	0	0	0	0	0	1	0	0	0	0	0	0	0	78	2	1	100	0	1	36.5	0	1	85.3333	0	1	6.14	1	1	159	0	1	1.1	1	1	47	1	1
1	1	1	0	>60	2	1	0	0	0	0	0	0	0	0	0	1	1	0	0	0	0	0	0	0	0	70	1	1	98	0	1	37.2222	0	1	100.667	0	1	0.4	0	1	177	0	1	3.1	0	1	12	0	1
1	1	6	0	0-60	3	1	0	0	0	0	0	0	0	0	0	0	0	0	0	0	0	0	0	0	0	41	0	1	98	0	1	36.7778	0	1	88	0	1	0.78	0	1	110	1	1	1	0	0	0	0	1
1	1	3	0	0-60	1	1	0	0	0	0	1	1	0	0	0	0	0	1	1	1	0	0	0	1	0	46	0	0	0	1	0	0	0	0	0	0	1	0.52	0	1	391	0	1	1	0	1	4.999	0	1
1	1	6	0	0-60	0	1	0	0	0	0	0	0	0	0	0	0	0	0	0	0	0	0	0	0	0	49	0	1	97	0	1	37.3333	0	1	80.3333	0	1	0.51	0	1	345	0	1	1	0	1	11	0	1
1	1	7	0	0-60	0	0	0	0	0	0	0	0	0	0	0	0	0	0	0	0	0	0	0	0	0	58	0	1	95	0	1	36.8333	0	1	90.6667	0	0	0	0	1	228	0	1	1	0	1	13	0	1
1	1	8	0	>70	4	0	0	0	1	0	1	1	0	0	1	0	0	1	1	1	0	0	0	1	0	72	2	1	98	0	1	37.1111	0	1	85.6667	0	1	0.42	0	1	89	2	0	0	0	1	17	0	1
1	0	0	0	>60	5	0	0	0	1	0	1	0	0	0	0	0	0	0	0	0	0	0	0	0	0	70	1	1	76	1	1	37.4444	0	1	94.3333	0	1	1.6	0	1	130	1	1	1	0	1	19	0	1
1	1	9	0	0-60	2	1	0	0	0	1	1	1	1	1	0	1	1	1	0	0	0	0	0	0	0	41	0	1	93	1	1	37.9444	0	1	86	0	0	0	0	1	283	0	1	1	0	1	7	0	1
1	1	2	0	0-60	2	0	0	0	1	0	2	1	1	0	0	0	1	1	0	0	0	0	0	0	0	46	0	1	96	0	1	36.7222	0	1	82.3333	0	0	0	0	1	159	0	1	1.1	0	1	31	1	1
1	1	2	1	0-60	6	0	0	0	1	0	0	0	0	0	0	0	0	0	0	0	0	0	0	0	0	31	0	1	98	0	1	37.1667	0	1	102	0	1	3.88	1	1	128	1	1	1.2	1	0	0	0	1
1	1	7	0	0-60	3	0	1	0	0	0	0	1	0	0	0	0	0	1	0	0	0	0	0	0	0	54	0	1	94	0	1	38.4444	1	1	102.333	0	1	1.86	0	1	38	2	1	1.1	0	1	11	0	1
1	1	3	0	0-60	1	0	0	0	1	0	0	0	0	0	0	0	0	0	0	0	0	0	0	0	0	22	0	1	99	0	1	36.7778	0	1	103.667	0	1	8.09	1	1	220	0	1	1	1	1	10	0	1
1	1	21	1	>60	2	0	0	0	1	0	0	1	0	0	1	0	0	0	1	1	0	0	0	0	0	67	1	1	95	0	1	36.9444	0	1	103.333	0	0	0	0	1	252	0	1	1.4	0	1	37	1	1
1	1	3	0	0-60	1	0	1	0	0	0	0	0	1	0	0	0	0	0	0	0	0	0	0	0	0	55	0	1	98	0	1	36.9444	0	1	76	0	1	16.09	1	1	166	0	1	1	1	1	12	0	1
1	1	2	1	>80	6	1	0	0	0	0	0	0	0	0	0	0	0	0	0	0	0	0	0	0	0	92	3	1	96	0	1	36.3889	0	1	70.6667	0	1	20	1	1	257	0	1	1.3	1	1	23	0	1
1	1	10	0	0-60	3	0	0	0	1	0	0	0	0	0	0	0	0	1	0	0	0	0	0	0	0	44	0	1	92	1	1	38.2778	1	1	90	0	1	1	0	1	249	0	1	1	0	1	12	0	1
1	1	13	1	>60	4	1	0	0	0	0	0	0	0	0	0	0	0	0	0	0	0	0	0	0	0	70	1	1	100	0	1	36.6111	0	1	80	0	1	20	1	1	262	0	1	1.1	1	1	32	1	1
1	1	2	0	>60	1	1	0	0	0	0	0	0	0	0	0	0	0	0	0	0	0	0	0	0	0	61	1	1	96	0	1	37.3889	0	1	77	0	1	0.55	0	1	184	0	1	1	0	0	0	0	1
1	1	6	0	0-60	1	0	0	0	1	0	0	0	0	0	0	0	0	0	0	0	0	0	0	0	0	48	0	1	99	0	1	37	0	1	110.667	0	1	0.51	0	1	298	0	1	1.3	0	1	10	0	1
1	1	4	0	>70	6	1	0	0	0	0	0	0	0	0	0	0	0	0	0	0	0	0	0	0	0	71	2	1	93	1	1	37.5	0	1	98	0	1	1.74	0	1	147	1	1	1.1	0	1	15	0	1
1	1	3	1	>80	10	0	0	0	1	0	0	0	1	1	0	0	0	0	0	0	0	0	0	0	0	88	3	1	88	1	1	38.1111	1	1	47	1	1	12.13	1	1	339	0	1	1.4	1	1	108	1	1
1	0	0	0	>70	4	0	1	0	0	0	0	0	0	0	0	0	0	0	1	1	0	0	0	1	0	77	2	0	0	1	0	0	0	0	0	0	0	0	0	0	0	0	1	1.1	0	0	0	0	1
1	1	5	0	>60	2	0	1	0	1	0	0	0	0	0	0	0	0	0	0	0	0	0	0	0	0	61	1	1	94	0	1	38	0	1	98.3333	0	1	0.44	0	1	241	0	1	1	0	1	18	0	1
1	1	8	1	>80	10	1	0	0	0	0	1	0	0	0	0	0	0	0	1	1	0	0	1	0	0	84	3	1	87	1	1	36.7222	0	1	28.3333	1	1	20	1	1	157	0	1	1.5	1	1	94	1	1
1	1	5	0	0-60	0	1	0	0	1	0	0	0	0	1	0	0	0	1	0	0	0	0	0	0	0	55	0	1	98	0	1	37.0556	0	1	86.3333	0	1	0.43	0	1	158	0	1	1.1	0	1	11	0	1
1	1	32	0	>70	7	0	1	0	0	0	0	0	0	0	0	0	0	0	0	0	0	0	0	0	0	73	2	1	85	1	1	39.3889	1	1	105	0	1	2.94	0	1	68	2	1	1.3	0	1	38	1	1
1	1	1	0	>70	6	1	0	0	0	0	0	0	0	0	0	0	0	0	0	0	0	0	0	0	0	77	2	1	93	1	1	37.4444	0	1	85.3333	0	1	8.23	1	1	263	0	1	1	1	1	16	0	1
1	1	2	1	0-60	4	0	0	0	1	0	0	0	0	0	0	1	1	0	0	0	0	0	0	0	0	45	0	1	56	1	1	37.6667	0	1	66.3333	0	1	4.02	1	1	291	0	1	1.2	1	1	39	1	1
1	1	16	0	>80	4	0	1	0	1	0	1	1	0	0	0	1	1	1	0	0	0	0	0	0	0	84	3	1	97	0	1	37.6667	0	1	106	0	1	1.58	0	1	154	0	1	1	0	1	18	0	1
1	1	4	0	>70	4	0	0	0	1	0	0	0	0	0	0	0	0	0	0	0	0	0	0	0	0	79	2	1	90	1	1	37.2778	0	1	86.3333	0	1	1.09	0	1	193	0	1	1.2	0	1	18	0	1
1	1	30	1	0-60	4	1	0	0	0	0	0	0	0	0	0	0	0	0	1	1	0	0	0	0	0	58	0	1	95	0	1	36.2778	0	1	84.3333	0	1	2.34	0	1	216	0	1	1.7	0	1	103	1	1
1	1	4	0	>60	3	0	0	0	1	0	0	0	0	0	0	0	0	0	0	0	0	0	0	0	0	62	1	1	95	0	1	37.6111	0	1	86.6667	0	1	0.5	0	1	182	0	1	1.1	0	1	16	0	1
1	1	14	0	>70	5	0	1	0	0	0	1	0	0	0	0	0	0	0	0	0	0	0	0	0	0	78	2	1	100	0	1	37.4444	0	1	81.6667	0	1	6.38	1	1	211	0	1	1.2	1	1	22	0	1
1	1	7	0	>70	7	1	0	0	0	0	0	0	0	0	0	0	0	0	0	0	0	0	0	0	0	74	2	1	96	0	1	36.6111	0	1	87	0	1	9.28	1	1	129	1	1	1.5	1	1	31	1	1
1	1	5	0	0-60	1	1	0	0	0	1	0	0	0	0	0	0	1	0	0	0	0	0	0	0	0	49	0	1	95	0	1	37	0	1	79.3333	0	1	0.27	0	1	236	0	1	1.1	0	1	10	0	1
1	1	30	0	>60	4	0	0	0	1	0	1	1	0	0	0	0	0	0	0	0	0	0	0	0	0	68	1	1	93	1	1	38.5556	1	1	87	0	1	0.91	0	1	265	0	1	1	0	1	17	0	1
1	1	9	0	>60	2	0	0	0	1	0	0	0	0	0	0	0	0	0	1	1	0	0	1	0	0	65	1	1	100	0	1	37.6111	0	1	84.3333	0	0	0	0	1	184	0	1	1	0	1	26	0	1
1	1	1	1	>60	4	1	0	0	0	0	0	0	0	0	0	1	1	1	0	0	0	0	0	0	0	62	1	1	94	0	1	36.7778	0	1	97	0	0	0	0	1	285	0	0	0	0	1	89	1	1
1	1	3	0	>60	4	0	0	0	1	0	0	0	0	0	0	1	1	1	1	0	0	1	0	0	0	66	1	1	100	0	1	36.8333	0	1	95.3333	0	0	0	0	1	36	2	0	0	0	1	11	0	1
1	1	4	0	>70	4	1	0	0	0	0	1	0	0	0	0	0	0	0	0	0	0	0	0	0	0	72	2	1	87	1	1	37.4444	0	1	84.6667	0	1	0.81	0	1	230	0	1	1	0	1	10	0	1
1	1	2	0	>60	1	0	0	0	1	0	0	0	0	0	0	0	0	0	0	0	0	0	0	0	0	70	1	1	100	0	1	36.3333	0	1	84	0	1	0.64	0	1	243	0	1	1	0	1	16	0	1
1	1	9	1	>60	3	1	0	0	0	0	0	0	0	0	1	0	0	0	0	0	0	0	0	0	0	63	1	1	98	0	1	37.8333	0	1	100	0	1	2.38	0	1	123	1	1	1.1	0	1	24	0	1
1	1	4	1	>70	7	0	0	0	0	0	0	0	0	0	0	0	0	0	0	0	0	0	0	0	0	74	2	1	92	1	1	38.8333	1	1	53.6667	1	0	0	0	1	316	0	1	1.2	0	1	41	1	1
1	1	2	0	0-60	2	1	0	0	0	0	0	0	0	0	0	0	0	0	0	0	0	0	0	0	0	54	0	1	95	0	1	36.5556	0	1	89	0	1	2.63	0	1	207	0	1	1	0	1	34	1	1
1	1	6	1	0-60	4	0	0	1	0	0	0	1	0	1	1	0	0	0	0	0	0	0	0	0	0	60	0	1	83	1	1	36.3333	0	1	72.6667	0	0	0	0	1	145	1	1	1	0	1	14	0	1
1	1	2	0	>70	5	1	0	0	0	0	0	0	0	0	0	1	1	1	0	0	0	0	0	0	0	78	2	1	98	0	1	36.3333	0	1	70.6667	0	0	0	0	1	119	1	0	0	0	1	27	0	1
1	1	3	0	>80	7	0	0	0	1	0	0	0	0	0	0	0	0	0	1	1	0	0	0	0	0	91	3	1	94	0	1	36.2778	0	1	37.3333	1	0	20	0	1	190	0	1	1.5	0	1	73	1	1
1	1	4	0	0-60	3	1	0	0	0	0	0	0	0	0	0	0	0	0	0	0	0	0	0	0	0	40	0	1	90	1	1	37.1111	0	1	92	0	1	1.01	0	1	362	0	1	1.2	0	1	17	0	1
1	1	1	0	0-60	1	1	0	0	0	0	0	0	0	0	0	0	0	1	0	0	0	0	0	0	0	46	0	1	98	0	1	37.3333	0	1	98.3333	0	1	0.74	0	1	266	0	1	1	0	1	6	0	1
1	1	3	1	>70	5	0	1	0	0	0	0	1	0	0	0	0	0	0	1	1	0	0	0	0	0	78	2	0	0	1	0	0	0	0	0	0	1	1.14	0	1	187	0	1	1.3	0	1	49	1	1
1	1	11	0	0-60	2	1	0	0	0	0	0	0	0	0	0	0	0	0	0	0	0	0	0	0	0	49	0	1	91	1	1	38.5556	1	1	92.6667	0	1	1.24	0	1	306	0	1	1.2	0	1	26	0	1
1	1	3	0	0-60	3	1	0	0	0	0	0	0	0	0	0	1	1	0	0	0	0	0	0	0	0	35	0	1	96	0	1	39.6667	1	1	103.333	0	0	0	0	1	249	0	1	1	0	1	18	0	1
1	1	1	1	>70	6	0	1	0	0	0	0	0	0	0	0	0	0	1	0	0	0	0	0	0	0	74	2	1	82	1	1	37.2778	0	1	44.6667	1	1	1.76	0	1	246	0	1	1.4	0	1	35	1	1
1	1	2	1	>70	7	0	1	0	0	0	0	1	0	0	0	0	0	1	0	0	0	0	0	0	0	72	2	1	90	1	1	37	0	1	73.6667	0	0	0	0	1	338	0	1	2.4	0	1	30	0	1
1	1	5	0	>60	1	0	0	0	1	0	0	0	0	0	0	0	0	0	0	0	0	0	0	0	0	66	1	1	100	0	1	36.7778	0	1	91	0	0	0	0	1	559	0	1	1.2	0	1	25	0	1
1	1	3	0	>70	4	0	0	0	1	0	1	0	0	1	0	0	0	1	1	1	0	0	1	0	0	75	2	1	97	0	1	36.8333	0	1	87.3333	0	0	0	0	1	48	2	1	1.1	0	1	28	0	1
1	1	3	0	0-60	0	0	0	0	1	0	0	0	0	0	0	0	0	1	0	0	0	0	0	0	0	49	0	1	94	0	1	37.2222	0	1	81.3333	0	1	2.16	0	1	271	0	1	1.1	0	1	11	0	1
1	1	13	0	0-60	3	1	0	0	0	0	0	0	0	0	0	0	0	0	0	0	0	0	0	0	0	51	0	1	91	1	1	37.7778	0	1	72.3333	0	1	2.49	0	1	128	1	1	1	0	0	0	0	1
1	1	13	1	>80	10	0	1	0	0	0	0	0	0	0	0	0	0	0	1	1	0	0	0	0	0	88	3	1	93	1	1	36.3889	0	1	40.6667	1	1	4.56	1	1	169	0	1	2.6	1	1	93	1	1
1	1	7	1	>60	5	1	0	0	0	0	0	0	0	0	0	0	0	0	0	0	0	0	0	0	0	70	1	1	96	0	1	36.6111	0	1	66.3333	0	1	6.23	1	1	316	0	1	1.5	1	1	42	1	1
1	1	7	1	0-60	7	1	0	0	0	0	0	0	0	0	0	1	1	0	0	0	0	0	0	0	0	56	0	0	0	1	1	-17.7778	0	1	79.6667	0	1	20	1	1	167	0	1	1.3	1	1	34	1	1
1	1	3	0	>60	1	0	0	0	1	0	0	0	0	0	0	0	0	0	0	0	0	0	0	0	0	64	1	1	94	0	1	37.1111	0	1	105.667	0	1	0.33	0	1	399	0	1	1.2	0	1	11	0	1
1	1	2	1	>60	7	1	0	0	0	0	0	0	0	0	0	0	0	0	0	0	0	0	0	0	0	63	1	1	89	1	1	37.2222	0	1	87.6667	0	1	20	1	1	139	1	1	1.3	1	1	17	0	1
1	1	7	0	>60	4	0	0	0	0	0	0	0	0	0	0	0	0	0	0	0	0	0	0	0	0	69	1	1	93	1	1	37	0	1	92.6667	0	1	2.04	0	1	222	0	1	1.1	0	0	0	0	1
1	0	0	0	>80	5	0	0	0	1	0	0	0	0	0	0	0	0	0	1	1	0	0	0	1	0	89	3	1	98	0	1	36.6667	0	1	70.6667	0	1	10.06	1	1	283	0	1	1.1	1	1	26	0	1
1	1	14	0	>60	2	0	0	1	0	0	0	0	0	0	0	0	0	0	0	0	0	0	0	0	0	61	1	1	94	0	1	37.0556	0	1	90	0	1	0.97	0	1	235	0	1	1	0	1	8	0	1
1	1	12	0	0-60	3	0	0	0	1	0	0	0	0	0	0	0	0	0	0	0	0	0	0	0	0	41	0	1	89	1	1	37.2222	0	1	80.6667	0	1	1.21	0	1	204	0	1	1.2	0	1	12	0	1
1	1	3	0	>60	1	1	0	0	0	0	0	0	0	0	0	0	0	0	0	0	0	0	0	0	0	61	1	1	94	0	1	36.7778	0	1	92.3333	0	1	2.05	0	1	250	0	1	1.1	0	1	9	0	1
1	1	6	0	>60	6	0	0	0	0	0	0	0	0	0	0	0	0	0	0	0	0	0	0	0	0	66	1	1	92	1	1	36.2778	0	1	112	0	1	20	1	1	361	0	1	1.3	1	1	32	1	1
1	0	0	0	>80	4	0	0	0	1	0	1	1	0	1	0	0	0	0	0	0	0	0	0	0	0	88	3	1	95	0	1	36.5556	0	1	91.3333	0	1	0.9	0	1	221	0	1	1	0	1	27	0	1
1	1	12	0	0-60	4	1	0	0	0	1	0	1	0	0	0	0	1	0	0	0	0	0	0	0	0	53	0	1	92	1	1	38.1111	1	1	100.333	0	0	0	0	1	213	0	1	1	0	1	27	0	1
1	1	11	1	>70	6	1	0	0	0	0	0	0	0	0	0	1	1	0	0	0	0	0	0	0	0	73	2	1	95	0	1	38.6111	1	1	113.333	0	1	16.29	1	1	195	0	1	1	1	0	0	0	1
1	1	5	0	>80	5	0	0	0	1	0	1	0	0	0	1	1	1	0	0	0	0	0	0	0	0	83	3	1	94	0	1	38.2222	1	1	80.3333	0	1	1.8	0	1	260	0	1	1.2	0	1	18	0	1
1	1	2	1	>70	7	0	0	0	0	0	0	0	0	0	0	0	0	0	1	1	0	0	0	0	0	73	2	1	93	1	1	37.5556	0	1	68	0	0	0	0	1	177	0	1	1.3	0	1	109	1	1
1	1	2	0	0-60	4	1	0	0	0	0	0	0	0	0	0	0	0	0	0	0	0	0	0	0	0	34	0	0	0	1	0	0	0	0	0	0	0	0	0	1	103	1	1	1.2	0	1	87	1	1
1	0	0	0	0-60	3	1	0	0	0	0	0	0	0	1	0	1	1	1	0	0	0	0	0	0	0	56	0	1	93	1	1	38.6111	1	1	117.667	0	1	4.79	1	1	181	0	1	1.2	1	1	11	0	1
1	1	8	0	0-60	1	0	0	0	0	0	0	0	0	0	0	0	0	0	1	0	0	1	0	0	0	58	0	1	96	0	1	36.8889	0	1	106.333	0	1	0.32	0	1	246	0	1	1	0	1	37	1	1
1	1	27	0	0-60	5	0	1	0	1	0	0	1	0	0	0	0	0	0	0	0	0	0	0	0	0	56	0	1	89	1	1	39.5	1	1	91.3333	0	1	10.58	1	1	370	0	1	1.3	1	1	26	0	1
1	1	4	0	>80	6	0	1	0	1	0	0	0	0	0	0	0	0	0	0	0	0	0	0	0	0	81	3	1	92	1	1	36.4444	0	1	89.3333	0	1	1.72	0	1	278	0	1	1.1	0	1	32	1	1
1	1	2	0	>60	2	0	0	0	1	0	0	0	0	0	0	0	0	0	1	1	0	0	1	0	0	70	1	1	95	0	1	37.8889	0	1	97.3333	0	1	3.13	1	1	261	0	1	1.1	1	1	17	0	1
1	1	7	0	>70	4	0	0	0	1	0	0	0	0	0	0	0	0	1	1	1	0	0	1	0	0	78	2	1	97	0	1	37.1667	0	1	81.6667	0	0	0	0	1	189	0	1	1	0	1	57	1	1
1	1	6	1	>70	3	0	0	0	1	0	0	1	1	0	0	1	1	1	0	0	0	0	0	0	0	75	2	1	98	0	1	36.6667	0	1	117.667	0	0	0	0	1	305	0	1	1.5	0	1	18	0	1
1	1	32	0	0-60	3	0	0	0	1	0	1	0	0	0	0	0	0	1	0	0	0	0	0	0	0	54	0	1	91	1	1	37.6111	0	1	78.3333	0	1	0.63	0	1	253	0	1	5.9	0	1	21	0	1
1	1	4	0	>70	3	1	0	0	0	0	0	0	0	0	0	0	0	0	0	0	0	0	0	0	0	79	2	1	99	0	1	39.1111	1	1	85.6667	0	1	0.88	0	1	275	0	1	2	0	1	12	0	1
1	1	7	0	0-60	2	0	0	0	1	0	0	0	0	0	0	0	0	0	0	0	0	0	0	0	0	40	0	1	85	1	1	37.2222	0	1	88.3333	0	1	0.92	0	1	395	0	1	1	0	1	6	0	1
1	1	9	0	0-60	5	0	1	0	0	0	0	0	0	0	0	0	0	0	0	0	0	0	0	0	0	47	0	1	92	1	1	36.7222	0	1	76.3333	0	1	7.52	1	1	399	0	1	1.3	1	1	13	0	1
1	1	7	0	>80	8	1	0	0	0	0	0	0	0	0	1	0	0	1	0	0	0	0	0	0	0	89	3	1	92	1	1	37	0	1	90.3333	0	1	1.43	0	1	93	2	1	1.1	0	1	84	1	1
1	1	5	0	0-60	0	0	0	0	1	0	0	0	0	0	0	0	0	0	0	0	0	0	0	0	0	43	0	1	94	0	1	39.7778	1	1	88.6667	0	1	0.48	0	1	258	0	1	1	0	1	10	0	1
1	1	7	0	0-60	1	1	0	0	0	0	0	0	0	0	0	0	0	0	0	0	0	0	0	0	0	58	0	1	97	0	1	37.5556	0	1	93.6667	0	1	0.6	0	1	328	0	1	1.1	0	1	10	0	1
1	1	5	0	0-60	2	0	0	0	1	0	0	1	0	0	0	0	0	1	0	0	0	0	0	0	0	49	0	1	96	0	1	36.6111	0	1	62.6667	0	1	4.24	1	1	333	0	1	1.1	1	1	33	1	1
1	1	6	1	>60	5	1	0	0	0	1	0	1	0	0	1	0	1	1	0	0	0	0	0	0	0	67	1	1	90	1	1	37.7222	0	1	68.3333	0	1	20	1	1	183	0	1	1.1	1	1	37	1	1
1	1	9	1	>60	3	0	0	0	1	0	0	0	0	0	0	1	1	1	0	0	0	0	0	0	0	69	1	1	100	0	1	36.8889	0	1	50.3333	1	1	3.67	1	1	281	0	1	1	1	0	0	0	1
1	1	3	0	>70	3	1	0	0	0	0	1	1	0	0	0	0	0	1	0	0	0	0	0	0	0	77	2	0	0	1	0	0	0	0	0	0	0	0	0	0	0	0	0	0	0	0	0	0	0
1	1	6	0	0-60	1	0	0	0	0	0	0	0	0	0	0	0	0	0	0	0	0	0	0	0	0	47	0	1	98	0	1	37.6667	0	1	90	0	1	1.11	0	1	243	0	1	1	0	1	16	0	1
1	1	25	0	0-60	2	0	0	0	1	0	0	1	0	0	0	1	1	1	0	0	0	0	0	0	0	56	0	1	84	1	1	36.8333	0	1	73.3333	0	1	1.2	0	1	181	0	1	1.1	0	1	15	0	1
1	1	3	0	0-60	3	1	0	0	0	1	1	1	0	0	0	1	1	1	0	0	0	0	0	0	0	36	0	0	0	1	0	0	0	0	0	0	1	1	0	1	212	0	1	1	0	1	11	0	1
1	1	8	0	0-60	1	0	0	0	0	0	0	0	0	0	0	0	0	0	1	1	0	0	0	1	0	50	0	1	98	0	1	37.5556	0	1	82	0	0	0	0	1	221	0	1	0.9	0	1	14	0	1
1	1	3	1	>70	7	0	0	0	0	0	1	0	1	0	0	1	1	1	0	0	0	0	0	0	0	73	2	1	89	1	1	37.2222	0	1	72.3333	0	0	0	0	1	152	0	0	0	0	1	108	1	1
1	1	2	0	>60	3	0	0	0	1	0	1	1	1	0	0	0	0	1	1	0	1	0	0	0	0	68	1	1	96	0	1	36.8333	0	1	101	0	1	3.5	1	1	449	0	1	1	1	1	18	0	1
1	1	9	0	0-60	4	1	0	0	0	0	0	0	0	0	0	0	0	0	0	0	0	0	0	0	0	50	0	1	88	1	1	38.2222	1	1	98	0	1	0.7	0	1	258	0	1	1.1	0	1	27	0	1
1	1	5	0	>80	6	1	0	0	0	0	0	0	0	0	0	0	0	0	0	0	0	0	0	0	0	82	3	1	92	1	1	38.1667	1	1	84.6667	0	1	0.49	0	1	167	0	1	1.8	0	1	25	0	1
1	1	9	0	0-60	2	0	0	0	1	0	0	0	0	0	0	0	0	0	0	0	0	0	0	0	0	59	0	1	82	1	1	37.1667	0	1	86.3333	0	1	1.17	0	1	189	0	1	0.9	0	1	22	0	1
1	1	23	1	>60	6	1	0	0	0	0	0	1	0	0	0	0	0	1	0	0	0	0	0	0	0	68	1	1	76	1	1	38.4444	1	1	92	0	1	1.1	0	1	131	1	1	0.9	0	0	0	0	1
1	1	13	0	0-60	3	0	0	0	0	0	0	0	0	0	0	0	0	0	0	0	0	0	0	0	0	47	0	1	96	0	1	37.9444	0	1	90.3333	0	1	1.5	0	1	183	0	1	1.1	0	1	80	1	1
1	1	11	0	>60	3	0	0	0	0	0	0	0	0	0	0	0	0	0	0	0	0	0	0	0	0	61	1	1	94	0	1	37.0556	0	1	92.3333	0	1	0.65	0	1	406	0	1	17.0001	0	0	0	0	1
1	1	16	1	>70	4	0	0	0	1	0	0	0	0	0	0	0	0	0	0	0	0	0	0	0	0	71	2	1	96	0	1	36.5	0	1	91.3333	0	1	0.69	0	1	199	0	1	1.1	0	1	11	0	1
1	1	4	0	0-60	3	0	0	1	0	0	0	0	1	0	0	0	0	0	0	0	0	0	0	0	0	60	0	1	86	1	1	37.6667	0	1	90.6667	0	1	1.45	0	1	233	0	1	1.1	0	1	24	0	1
1	1	3	0	0-60	1	1	0	0	0	0	1	0	0	0	0	0	0	0	0	0	0	0	0	0	0	55	0	0	0	1	0	0	0	0	0	0	0	0	0	0	0	0	0	0	0	0	0	0	0
1	1	9	0	0-60	3	1	0	0	0	0	1	0	0	0	0	0	0	0	0	0	0	0	0	0	0	53	0	1	94	0	1	37.6111	0	1	113	0	1	1.48	0	1	108	1	1	1.2	0	1	25	0	1
1	1	16	0	>70	7	1	0	0	1	0	0	1	0	1	1	0	0	1	0	0	0	0	0	0	0	71	2	1	93	1	1	36.7222	0	1	89	0	1	4.23	1	1	187	0	1	1.8	1	1	12	0	1
1	1	5	0	0-60	2	0	0	0	0	0	0	0	1	1	0	0	0	1	1	1	0	0	0	1	0	60	0	1	97	0	1	38	0	1	92.3333	0	1	1.07	0	1	114	1	1	1	0	1	7	0	1
1	1	7	0	>80	3	1	0	0	0	0	0	0	0	0	0	0	0	0	0	0	0	0	0	0	0	88	3	1	96	0	1	36.8333	0	1	80.6667	0	1	1.5	0	1	267	0	1	1	0	1	26	0	1
1	1	9	0	>70	6	0	0	0	0	1	0	1	0	0	1	1	1	1	1	1	0	0	0	0	0	78	2	1	98	0	1	36.8889	0	1	77.6667	0	1	4.8	1	1	368	0	1	1.1	1	1	67	1	1
1	1	31	0	>60	7	0	0	0	1	1	1	1	0	0	0	0	1	0	0	0	0	0	0	0	0	65	1	1	70	1	1	36.8889	0	1	72.6667	0	1	3.71	1	1	422	0	1	1	1	1	133	1	1
1	1	9	0	0-60	6	1	0	0	0	0	0	0	1	0	1	0	0	0	1	1	0	0	1	0	0	58	0	1	79	1	1	37.8333	0	1	70	0	1	3.7	1	1	203	0	1	1.1	1	1	49	1	1
1	0	0	0	0-60	1	0	0	0	0	0	1	0	0	0	0	0	0	0	0	0	0	0	0	0	0	59	0	1	97	0	1	36.8333	0	1	90.3333	0	1	0.8	0	1	198	0	1	1.1	0	1	9	0	1
1	1	6	1	0-60	3	1	0	0	0	0	0	0	0	0	0	0	0	0	0	0	0	0	0	0	0	45	0	1	75	1	1	37.4444	0	0	0	0	1	2.5	0	1	215	0	1	1	0	1	13	0	1
1	1	2	1	>80	7	0	1	0	0	0	0	0	0	0	0	0	0	0	0	0	0	0	0	0	0	90	3	1	83	1	1	39.2778	1	1	82	0	1	5.6	1	1	159	0	1	1.2	1	1	62	1	1
1	1	12	0	>60	2	0	0	0	1	0	2	0	0	0	0	0	1	1	0	0	0	0	0	0	0	69	1	1	100	0	1	36.3333	0	1	76.6667	0	1	1.89	0	1	320	0	1	1.3	0	1	15	0	1
1	1	2	0	>60	1	1	0	0	0	0	1	0	0	0	0	0	0	1	0	0	0	0	0	0	0	67	1	1	94	0	1	37.1667	0	1	90	0	1	0.54	0	1	297	0	1	0.9	0	1	14	0	1
1	1	28	1	0-60	4	1	0	0	0	0	0	0	0	0	0	0	0	0	0	0	0	0	0	0	0	60	0	1	91	1	1	36.9444	0	1	87.6667	0	1	13.97	1	1	299	0	1	1	1	0	0	0	1
1	1	46	0	0-60	2	1	0	0	0	0	0	0	0	0	0	1	1	0	0	0	0	0	0	0	0	56	0	1	96	0	1	38.9444	1	1	93	0	1	2.46	0	1	100	1	1	1	0	0	0	0	1
1	1	5	0	>70	8	0	1	0	0	0	0	0	0	0	0	0	0	0	0	0	0	0	0	0	0	74	2	1	95	0	1	36.4444	0	1	99	0	1	15.83	1	1	272	0	1	1.4	1	1	61	1	1
1	1	3	0	0-60	3	1	0	0	0	0	0	0	0	0	0	0	0	0	1	1	0	0	0	0	0	59	0	1	96	0	1	36.5556	0	1	106	0	1	3.64	1	1	98	2	1	1.1	1	1	16	0	1
1	1	2	1	>80	5	0	1	0	0	0	0	0	0	0	0	0	0	0	0	0	0	0	0	0	0	91	3	1	94	0	1	35.1111	0	1	46.3333	1	0	0	0	1	198	0	1	1.1	0	1	27	0	1
1	1	7	0	>70	6	1	0	0	0	0	2	0	0	0	0	1	1	0	0	0	0	0	0	0	0	78	2	1	71	1	1	36.7778	0	1	98.6667	0	1	3.43	1	1	108	1	1	1.5	1	1	39	1	1
1	1	4	0	>60	2	0	0	0	0	0	0	0	0	0	0	0	0	0	0	0	0	0	0	0	0	67	1	1	87	1	1	36.7778	0	1	102.333	0	0	0	0	1	348	0	1	1	0	1	28	0	1
1	1	5	0	>60	2	0	0	0	0	0	1	1	0	1	0	0	0	0	0	0	0	0	0	0	0	64	1	0	0	1	0	0	0	0	0	0	0	0	0	0	0	0	0	0	0	0	0	0	0
1	1	3	0	0-60	1	0	0	0	1	0	1	0	0	0	1	1	1	1	0	0	0	0	0	0	0	24	0	1	97	0	1	36.8333	0	1	95.6667	0	0	0	0	1	231	0	0	0	0	1	13	0	1
1	1	2	0	0-60	4	0	0	0	1	0	1	0	0	0	0	0	0	0	0	0	0	0	0	0	0	47	0	1	93	1	1	38.8889	1	1	81	0	1	3.94	1	1	262	0	1	1.1	1	1	14	0	1
1	0	0	0	>80	5	0	0	0	1	0	1	0	0	0	0	0	0	0	0	0	0	0	0	0	0	81	3	1	93	1	1	36.1111	0	1	76.6667	0	1	0.34	0	1	435	0	1	1.1	0	1	28	0	1
1	1	8	1	>70	8	1	0	0	0	0	0	0	0	0	0	0	0	0	0	0	0	0	0	0	0	72	2	1	83	1	1	37.4444	0	1	46.6667	1	1	3.23	1	1	143	1	1	1	1	1	15	0	1
1	1	39	0	0-60	1	1	0	0	0	0	0	0	0	0	0	0	0	0	0	0	0	0	0	0	0	52	0	1	94	0	1	37.6111	0	1	94.6667	0	1	0.38	0	1	133	1	1	1.1	0	0	0	0	1
1	1	6	0	0-60	3	0	1	0	0	0	0	0	0	0	0	0	0	0	0	0	0	0	0	0	0	56	0	1	96	0	1	38.7222	1	1	91.6667	0	0	0	0	1	518	0	1	1.6	0	1	38	1	1
1	1	29	0	>70	5	1	0	0	0	0	1	1	0	0	1	0	0	1	0	0	0	0	0	0	0	77	2	1	97	0	1	37.8889	0	1	102	0	1	1.69	0	1	162	0	1	1.1	0	0	0	0	1
1	1	1	0	0-60	0	1	0	0	1	0	0	0	0	0	0	0	0	0	0	0	0	0	0	0	0	18	0	1	99	0	1	36.7222	0	1	78	0	1	0.27	0	1	219	0	1	1	0	1	12	0	1
1	1	6	0	0-60	1	1	0	0	0	0	0	0	0	0	0	0	0	0	0	0	0	0	0	0	0	59	0	1	77	1	1	36.8889	0	1	88.6667	0	1	1.41	0	1	416	0	1	1.1	0	1	14	0	1
[truncated: 2,712 more rows]
[truncated: 35 more columns]
